# Supplementary material for: ATP and large signaling metabolites flux through caspase-activated Pannexin 1 channels
Source: eLife. 2021 Jan 7;10:e64787. doi: 10.7554/eLife.64787 (PMC7806264; doi:10.7554/eLife.64787)
Supplement: Figure 1—figure supplement 1—source data 1. [file elife-64787-fig1-figsupp1-data1.xlsx]

## Sheet: Sheet1
Figure 1 Supplmenent 1 C: Diameters of fPanx1 Proteoliposomes
		141.559
		87.5155
		126.1
		93.0815
		88.815
		84.099
		145.833
		91.303
		97.4845
		102.727
		126.632
		86.1815
		113.68
		118.736
		109.368
		98.135
		92.5565
		73.6865
		79.839
		67.2545
		100.124
		92.651
		84.7085
		107.421
		60.516
		113.553
		47.2165
		68.172
		71.93
		66.6425
		81.532
		117.052
		100.924
		108.298
		91.708
		111.472
		100.699
		72.8345
		89.456
		75.072
		123.05
		74.1725
		90.1605
		103.099
		93.0325
		96.1065
		101.043
		92.87
		120.317
		105.147
		116.391
		113.8
		79.2705
		91.707
		123.839
		84.682
		59.2485
		126.042
		121.856
		113.079
		67.259
		86.272
		84.045
		113.623
		71.559
		125.299
		47.5155
		79.2515
		101.942
		95.811
		64.558
		104.38
		62.1475
		117.766
		118.218
		92.4125
		91.975
		83.721
		120.19
		65.6075
		96.8435
		81.258
		85.039
		112.043
		71.541
		113.871
		97.1945
		113.75
		81.9585
		89.744
		164.712
		86.5635
		92.295
		122.152
		133.645
		95.805
		104.185
		108.732
		59.0935
		88.718
		97.5255
		68.739
		155.333
		121.38
		84.6455
		81.27
		86.936
		95.7005
		111.378
		134.019
		112.785
		102.88
		100.993
		106.573
		78.319
		71.3425
		70.1945
		127.644
		116.603
		119.778
		132.861
		112.257
		94.523
		86.181
		90.04
		119.118
		133.964
		70.175
		105.553
		67.304
		71.261
		124.806
		104.611
		174.05
		89.4085
		154.206
		87.976
		62.927
		64.948
		74.5405
		104.643
		106.596
		89.146
		107.238
		79.18
		90.009
		145.561
		129.81
		90.5465
		89.5545
		146.78
		155.477
		128.693
		84.796
		121.832
		109.134
		120.932
		131.962
		106.479
		60.4495
		112.988
		88.2055
		112.695
		89.8795
		116.375
		76.949
		136.822
		179.363
		98.2365
		116.045
		116.386
		141.242
		119.275
		147.929
		77.08
		78.2425
		96.9875
		82.247
		89.0065
		74.736
		68.6035
		74.9395
		125.276
		66.074
		115.7
		94.0085
		108.431
		81.492
		86.438
		117.626
		118.626
		91.367
		98.8275
		106.922
		68.516
		87.32
		96.0555
		62.398
		105.29
		109.234
		103.996
		80.674
		218.104
		131.263
		106.285
		125.936
		88.9325
		73.6055
		111.214
		93.819
		85.1575
		105.502
		100.604
		97.248
		100.166
		90.2435
		78.199
		117.218
		66.7425
		54.0145
		65.4255
		93.3265
		130.617
		58.4245
		52.5955
		81.056
		99.2865
		99.03
		73.7185
		87.964
		98.397
		114.538
		61.5685
		91.44
		88.7425
		89.175
		91.252
		88.6785
		74.8045
		117.725
		135.458
		48.4085
		119.037
		172.75
		68.455
		114.888
		109.168
		99.299
		103.042
		103.144
		130.133
		106.082
		74.765
		73.826
		106.359
		108.239
		87.7465
		109.954
		56.707
		72.9055
		106.564
		80.8665
		86.085
		77.8075
		106.688
		93.445
		103.612
		101.508
		113.273
		102.206
		87.8345
		100.614
		115.037
		104.976
		123.843
		63.485
		102.829
		124.349
		109.751
		117.127
		75.9045
		73.0555
		94.419
		93.1995
		107.595
		114.238
		102.838
		97.273
		70.1745
		106.847
		97.091
		94.5035
		67.7725
		102.13
		120.082
		96.855
		117.026
		89.4415
		64.187
		111.121
		97.0935
		121.828
		126.126
		85.9885
		101.802
		81.235
		103.871
		94.8245
		102.525
		106.85
		86.616
		109.89
		64.7325
		126.344
		94.9945
		161.36
		92.2585
		70.0955
		117.701
		134.369
		124.296
		158.915
		119.684
		143.583
		75.185
		98.6925
		74.122
		120.733
		103.823
		102.455
		56.9805
		145.845
		84.5605
		98.6335
		115.036
		116.032
		88.5205
		86.3315
		87.408
		92.7615
		95.113
		83.714
		102.685
		73.364
		99.023
		102.04
		99.2505
		71.123
		70.146
		71.782
		114.688
		85.9535
		79.7615
		93.525
		113.733
		80.8895
		110.234
		82.906
		97.148
		112.371
		110.212
		113.154
		91.9345
		84.341
		118.415
		112.509
		97.013
		114.548
		102.739
		115.089
		61.9915
		82.5485
		110.915
		69.0655
