# Supplementary material for: ATP and large signaling metabolites flux through caspase-activated Pannexin 1 channels
Source: eLife. 2021 Jan 7;10:e64787. doi: 10.7554/eLife.64787 (PMC7806264; doi:10.7554/eLife.64787)
Supplement: Figure 1—figure supplement 2—source data 1. [file elife-64787-fig1-figsupp2-data1.xlsx]

## Sheet: Sheet1
	Figure 1 Supplement 2 A, B, C In vitro electrophysiology of fPanx1
	A) fPanx1-GFP							B) fPanx1-GFP + Casp-3							C) fPanx1-GFP + Casp3 and hPANX1(TEV) + TEV
	IV of fPanx1-GFP				Inset			IV of fPanx1-GFP + Casp3				Inset			IV of fPanx1-GFP + Casp3 and hPANX1(TEV) + TEV
	Em (mV)	Basal	CBX		Time (min)	Current (pA)		Em (mV)	Basal	CBX		Time (min)	Current (pA)		Em (mV)	hPANX1(TEV) + TEVp	fPanx1-GFP+Casp3
	-129.9	-33.6711	-31.1686		0	50.5371		-129.9	-33.6711	-31.1686		0	40.7715		-129.9	-0.14859	-0.25194
	-129.8	-33.8949	-31.5145		0.11667	53.5278		-129.8	-33.8949	-31.5145		0.11667	37.2314		-129.8	-0.15277	-0.24915
	-129.7	-33.8338	-30.6803		0.23333	50.293		-129.7	-33.8338	-30.6803		0.23333	36.6211		-129.7	-0.15115	-0.2492
	-129.6	-33.488	-31.0262		0.35	52.3071		-129.6	-33.488	-31.0262		0.35	36.1938		-129.6	-0.14831	-0.24155
	-129.5	-33.5286	-30.5379		0.46667	51.2085		-129.5	-33.5286	-30.5379		0.46667	45.105		-129.5	-0.14991	-0.25383
	-129.4	-33.2438	-29.541		0.58333	51.0254		-129.4	-33.2438	-29.541		0.58333	41.3818		-129.4	-0.15367	-0.24506
	-129.3	-33.1828	-31.311		0.7	49.9878		-129.3	-33.1828	-31.311		0.7	47.9126		-129.3	-0.15105	-0.24436
	-129.2	-32.9997	-30.2938		0.81667	58.8989		-129.2	-32.9997	-30.2938		0.81667	41.3208		-129.2	-0.15077	-0.25045
	-129.1	-33.8135	-29.9886		0.93333	52.6123		-129.1	-33.8135	-29.9886		0.93333	49.9267		-129.1	-0.15467	-0.24673
	-129	-34.7493	-29.7241		1.05	58.4106		-129	-34.7493	-29.7241		1.05	44.8608		-129	-0.15063	-0.24919
	-128.9	-34.3628	-30.2531		1.16667	62.3169		-128.9	-34.3628	-30.2531		1.16667	45.3491		-128.9	-0.15628	-0.25048
	-128.8	-33.4676	-29.602		1.28333	54.0161		-128.8	-33.4676	-29.602		1.28333	52.6733		-128.8	-0.14988	-0.25304
	-128.7	-33.4473	-29.1341		1.4	52.9785		-128.7	-33.4473	-29.1341		1.4	48.3398		-128.7	-0.14919	-0.24393
	-128.6	-34.4035	-29.7445		1.51667	50.5981		-128.6	-34.4035	-29.7445		1.51667	75.0122		-128.6	-0.14883	-0.24361
	-128.5	-34.3221	-29.012		1.63333	53.4058		-128.5	-34.3221	-29.012		1.63333	70.8618		-128.5	-0.15001	-0.24862
	-128.4	-34.8104	-28.1169		1.75	54.5654		-128.4	-34.8104	-28.1169		1.75	91.3696		-128.4	-0.1465	-0.24852
	-128.3	-34.7697	-28.6662		1.86667	52.063		-128.3	-34.7697	-28.6662		1.86667	92.5903		-128.3	-0.14824	-0.24505
	-128.2	-33.02	-29.2358		1.98333	54.5044		-128.2	-33.02	-29.2358		1.98333	99.9145		-128.2	-0.14847	-0.24627
	-128.1	-33.4676	-29.1545		2.1	55.9082		-128.1	-33.4676	-29.1545		2.1	145.752		-128.1	-0.15145	-0.24608
	-128	-33.1828	-28.361		2.21667	54.5044		-128	-33.1828	-28.361		2.21667	151.856		-128	-0.14618	-0.24544
	-127.9	-33.5286	-30.2531		2.33333	58.7158		-127.9	-33.5286	-30.2531		2.33333	188.843		-127.9	-0.1507	-0.24431
	-127.8	-31.9621	-29.0934		2.45	59.4482		-127.8	-31.9621	-29.0934		2.45	228.577		-127.8	-0.15621	-0.25045
	-127.7	-32.6945	-29.8258		2.56667	58.7158		-127.7	-32.6945	-29.8258		2.56667	252.685		-127.7	-0.15293	-0.24721
	-127.6	-31.6162	-29.4596		2.68333	56.0913		-127.6	-31.6162	-29.4596		2.68333	296.936		-127.6	-0.15314	-0.24809
	-127.5	-32.6945	-30.2124		2.8	53.6499		-127.5	-32.6945	-30.2124		2.8	297.058		-127.5	-0.15163	-0.24705
	-127.4	-34.8918	-29.0527		2.91667	53.1006		-127.4	-34.8918	-29.0527		2.91667	295.471		-127.4	-0.15172	-0.25013
	-127.3	-32.6741	-29.6427		3.03333	53.9551		-127.3	-32.6741	-29.6427		3.03333	274.963		-127.3	-0.1519	-0.24693
	-127.2	-33.2031	-29.48		3.15	51.1475		-127.2	-33.2031	-29.48		3.15	301.086		-127.2	-0.14954	-0.24353
	-127.1	-33.9966	-30.1717		3.26667	57.5562		-127.1	-33.9966	-30.1717		3.26667	333.496		-127.1	-0.14421	-0.24509
	-127	-33.6304	-30.07		3.38333	51.3916		-127	-33.6304	-30.07		3.38333	341.675		-127	-0.14882	-0.24883
	-126.9	-31.8603	-30.1107		3.5	56.3965		-126.9	-31.8603	-30.1107		3.5	365.356		-126.9	-0.1539	-0.25137
	-126.8	-34.2814	-30.1107		3.61667	55.4809		-126.8	-34.2814	-30.1107		3.61667	364.807		-126.8	-0.15052	-0.24803
	-126.7	-34.4849	-30.1717		3.73333	52.7954		-126.7	-34.4849	-30.1717		3.73333	403.503		-126.7	-0.15177	-0.24787
	-126.6	-32.959	-28.9917		3.85	56.0303		-126.6	-32.959	-28.9917		3.85	379.883		-126.6	-0.15307	-0.25331
	-126.5	-32.5317	-31.4331		3.96667	55.7861		-126.5	-32.5317	-31.4331		3.96667	376.16		-126.5	-0.14808	-0.24532
	-126.4	-31.4331	-30.0903		4.08333	54.0161		-126.4	-31.4331	-30.0903		4.08333	405.029		-126.4	-0.14941	-0.2489
	-126.3	-31.7586	-30.4769		4.2	61.9507		-126.3	-31.7586	-30.4769		4.2	448.975		-126.3	-0.14828	-0.24553
	-126.2	-33.549	-29.2358					-126.2	-33.549	-29.2358		4.31667	438.354		-126.2	-0.15026	-0.24927
	-126.1	-32.2672	-30.0903					-126.1	-32.2672	-30.0903		4.43333	437.561		-126.1	-0.14901	-0.24281
	-126	-32.1045	-30.0496					-126	-32.1045	-30.0496		4.55	474.06		-126	-0.14824	-0.24588
	-125.9	-32.2469	-29.7038					-125.9	-32.2469	-29.7038		4.66667	487.976		-125.9	-0.14702	-0.2412
	-125.8	-31.8197	-30.0903					-125.8	-31.8197	-30.0903		4.78333	506.409		-125.8	-0.14726	-0.25227
	-125.7	-33.1624	-28.951					-125.7	-33.1624	-28.951		4.9	502.869		-125.7	-0.14733	-0.24497
	-125.6	-32.6131	-28.0965					-125.6	-32.6131	-28.0965		5.01667	479.919		-125.6	-0.15268	-0.24671
	-125.5	-31.8197	-30.7821					-125.5	-31.8197	-30.7821		5.13333	500.122		-125.5	-0.15046	-0.24479
	-125.4	-31.6772	-30.1717					-125.4	-31.6772	-30.1717		5.25	472.473		-125.4	-0.14669	-0.23931
	-125.3	-33.1624	-31.1279					-125.3	-33.1624	-31.1279		5.36667	475.22		-125.3	-0.14571	-0.24146
	-125.2	-31.9621	-30.0089					-125.2	-31.9621	-30.0089		5.48333	544.556		-125.2	-0.14858	-0.24026
	-125.1	-33.4066	-27.771					-125.1	-33.4066	-27.771		5.6	591.431		-125.1	-0.15254	-0.23967
	-125	-32.6945	-28.422					-125	-32.6945	-28.422		5.71667	588.989		-125	-0.14969	-0.24534
	-124.9	-30.7617	-27.7913					-124.9	-30.7617	-27.7913		5.83333	648.62		-124.9	-0.15119	-0.24461
	-124.8	-32.6131	-27.0589					-124.8	-32.6131	-27.0589		5.95	690.369		-124.8	-0.15092	-0.24455
	-124.7	-31.6772	-28.4424					-124.7	-31.6772	-28.4424		6.06667	695.251		-124.7	-0.14923	-0.24583
	-124.6	-30.1107	-28.2186					-124.6	-30.1107	-28.2186		6.18333	752.197		-124.6	-0.14634	-0.24457
	-124.5	-31.5959	-28.4424					-124.5	-31.5959	-28.4424		6.3	774.658		-124.5	-0.14887	-0.24914
	-124.4	-30.7414	-28.2796					-124.4	-30.7414	-28.2796		6.41667	790.894		-124.4	-0.1517	-0.25005
	-124.3	-31.4738	-28.0151					-124.3	-31.4738	-28.0151		6.53333	797.058		-124.3	-0.14695	-0.24782
	-124.2	-31.2297	-29.7038					-124.2	-31.2297	-29.7038		6.65	747.375		-124.2	-0.14647	-0.24621
	-124.1	-31.5755	-29.2969					-124.1	-31.5755	-29.2969		6.76667	812.744		-124.1	-0.14884	-0.24819
	-124	-31.311	-29.4596					-124	-31.311	-29.4596		6.88333	792.969		-124	-0.15042	-0.24247
	-123.9	-30.6803	-28.4424					-123.9	-30.6803	-28.4424		7	771.789		-123.9	-0.14576	-0.24092
	-123.8	-32.3893	-31.4331					-123.8	-32.3893	-31.4331		7.11667	800.72		-123.8	-0.15077	-0.24302
	-123.7	-30.9855	-29.8462					-123.7	-30.9855	-29.8462		7.23333	763		-123.7	-0.15414	-0.2372
	-123.6	-30.9652	-28.6051					-123.6	-30.9652	-28.6051		7.35	769.47		-123.6	-0.14973	-0.23569
	-123.5	-31.5755	-30.4769					-123.5	-31.5755	-30.4769		7.46667	785.583		-123.5	-0.14987	-0.24248
	-123.4	-30.7007	-28.6458					-123.4	-30.7007	-28.6458		7.58333	754.822		-123.4	-0.15045	-0.2416
	-123.3	-30.4158	-29.3783					-123.3	-30.4158	-29.3783		7.7	671.204		-123.3	-0.14913	-0.24137
	-123.2	-30.5583	-29.2358					-123.2	-30.5583	-29.2358		7.81667	549.927		-123.2	-0.15033	-0.23561
	-123.1	-31.25	-28.6051					-123.1	-31.25	-28.6051		7.93333	422.424		-123.1	-0.15293	-0.24054
	-123	-29.5817	-29.2358					-123	-29.5817	-29.2358		8.05	358.704		-123	-0.14846	-0.24396
	-122.9	-29.7852	-29.3376					-122.9	-29.7852	-29.3376		8.16667	337.036		-122.9	-0.14898	-0.23941
	-122.8	-31.25	-28.7476					-122.8	-31.25	-28.7476		8.28333	295.959		-122.8	-0.1478	-0.23907
	-122.7	-29.2765	-28.4831					-122.7	-29.2765	-28.4831		8.4	246.46		-122.7	-0.14635	-0.23689
	-122.6	-30.5379	-27.7506					-122.6	-30.5379	-27.7506		8.51667	196.899		-122.6	-0.14427	-0.23712
	-122.5	-31.0059	-27.7506					-122.5	-31.0059	-27.7506		8.63333	184.509		-122.5	-0.14782	-0.23781
	-122.4	-30.66	-27.5472					-122.4	-30.66	-27.5472		8.75	152.954		-122.4	-0.14497	-0.24128
	-122.3	-31.1076	-27.8727					-122.3	-31.1076	-27.8727		8.86667	156.067		-122.3	-0.14713	-0.24472
	-122.2	-30.07	-27.8117					-122.2	-30.07	-27.8117		8.98333	144.287		-122.2	-0.15184	-0.24155
	-122.1	-29.8869	-27.12					-122.1	-29.8869	-27.12		9.1	116.76		-122.1	-0.14573	-0.23875
	-122	-29.5614	-27.9338					-122	-29.5614	-27.9338		9.21667	112.061		-122	-0.14413	-0.23568
	-121.9	-30.6396	-28.4831					-121.9	-30.6396	-28.4831		9.33333	102.478		-121.9	-0.14331	-0.22901
	-121.8	-29.0324	-28.2186					-121.8	-29.0324	-28.2186		9.45	131.103		-121.8	-0.14126	-0.23291
	-121.7	-29.0324	-27.5269					-121.7	-29.0324	-27.5269		9.56667	122.864		-121.7	-0.14369	-0.2357
	-121.6	-29.2358	-28.8696					-121.6	-29.2358	-28.8696		9.68333	109.619		-121.6	-0.14187	-0.2403
	-121.5	-29.7038	-26.2655					-121.5	-29.7038	-26.2655		9.8	99.6094		-121.5	-0.14094	-0.23809
	-121.4	-29.0731	-27.0589					-121.4	-29.0731	-27.0589		9.91667	87.9517		-121.4	-0.14374	-0.24115
	-121.3	-28.9917	-28.361					-121.3	-28.9917	-28.361					-121.3	-0.14201	-0.23577
	-121.2	-29.5003	-26.7944					-121.2	-29.5003	-26.7944					-121.2	-0.14343	-0.23653
	-121.1	-28.2593	-27.7303					-121.1	-28.2593	-27.7303					-121.1	-0.1478	-0.23937
	-121	-30.0293	-27.3641					-121	-30.0293	-27.3641					-121	-0.14484	-0.24129
	-120.9	-29.0934	-27.4048					-120.9	-29.0934	-27.4048					-120.9	-0.14282	-0.24069
	-120.8	-28.6662	-27.3031					-120.8	-28.6662	-27.3031					-120.8	-0.14157	-0.24042
	-120.7	-30.0293	-27.3641					-120.7	-30.0293	-27.3641					-120.7	-0.14161	-0.23063
	-120.6	-29.1748	-27.4658					-120.6	-29.1748	-27.4658					-120.6	-0.14277	-0.23957
	-120.5	-28.7882	-27.771					-120.5	-28.7882	-27.771					-120.5	-0.1388	-0.23127
	-120.4	-28.7272	-27.7506					-120.4	-28.7272	-27.7506					-120.4	-0.14474	-0.23738
	-120.3	-28.8493	-26.9165					-120.3	-28.8493	-26.9165					-120.3	-0.14292	-0.2395
	-120.2	-28.9917	-27.3031					-120.2	-28.9917	-27.3031					-120.2	-0.14553	-0.23682
	-120.1	-28.3	-27.2624					-120.1	-28.3	-27.2624					-120.1	-0.14351	-0.23938
	-120	-28.422	-27.9744					-120	-28.422	-27.9744					-120	-0.14224	-0.23363
	-119.9	-30.0293	-28.5238					-119.9	-30.0293	-28.5238					-119.9	-0.14144	-0.24089
	-119.8	-29.4189	-28.422					-119.8	-29.4189	-28.422					-119.8	-0.1486	-0.23125
	-119.7	-29.0731	-26.8758					-119.7	-29.0731	-26.8758					-119.7	-0.14487	-0.23339
	-119.6	-29.2765	-27.0386					-119.6	-29.2765	-27.0386					-119.6	-0.14746	-0.23563
	-119.5	-28.2186	-27.0386					-119.5	-28.2186	-27.0386					-119.5	-0.14554	-0.23287
	-119.4	-29.1341	-25.7568					-119.4	-29.1341	-25.7568					-119.4	-0.14469	-0.23677
	-119.3	-29.3579	-26.9775					-119.3	-29.3579	-26.9775					-119.3	-0.14205	-0.23867
	-119.2	-30.2124	-26.591					-119.2	-30.2124	-26.591					-119.2	-0.14164	-0.23761
	-119.1	-28.3813	-26.6724					-119.1	-28.3813	-26.6724					-119.1	-0.14249	-0.23387
	-119	-28.6255	-26.4893					-119	-28.6255	-26.4893					-119	-0.14395	-0.24358
	-118.9	-29.1341	-26.7334					-118.9	-29.1341	-26.7334					-118.9	-0.1485	-0.23727
	-118.8	-30.5583	-27.242					-118.8	-30.5583	-27.242					-118.8	-0.14362	-0.23845
	-118.7	-29.7852	-26.1434					-118.7	-29.7852	-26.1434					-118.7	-0.14366	-0.23458
	-118.6	-27.9541	-24.9634					-118.6	-27.9541	-24.9634					-118.6	-0.14304	-0.23283
	-118.5	-29.4393	-25.1872					-118.5	-29.4393	-25.1872					-118.5	-0.14508	-0.23213
	-118.4	-30.4158	-24.5158					-118.4	-30.4158	-24.5158					-118.4	-0.14374	-0.2352
	-118.3	-28.4424	-25.3296					-118.3	-28.4424	-25.3296					-118.3	-0.14572	-0.2347
	-118.2	-28.9307	-25.0041					-118.2	-28.9307	-25.0041					-118.2	-0.14056	-0.22955
	-118.1	-29.1951	-25.9196					-118.1	-29.1951	-25.9196					-118.1	-0.14238	-0.2371
	-118	-28.9714	-27.3844					-118	-28.9714	-27.3844					-118	-0.14263	-0.24007
	-117.9	-29.2155	-26.4282					-117.9	-29.2155	-26.4282					-117.9	-0.14352	-0.23742
	-117.8	-28.422	-26.0824					-117.8	-28.422	-26.0824					-117.8	-0.1474	-0.23434
	-117.7	-29.2358	-26.3468					-117.7	-29.2358	-26.3468					-117.7	-0.14305	-0.23951
	-117.6	-27.9338	-26.1434					-117.6	-27.9338	-26.1434					-117.6	-0.14418	-0.23985
	-117.5	-27.5675	-26.2858					-117.5	-27.5675	-26.2858					-117.5	-0.14578	-0.23476
	-117.4	-28.422	-26.3062					-117.4	-28.422	-26.3062					-117.4	-0.14419	-0.23753
	-117.3	-28.7272	-25.3296					-117.3	-28.7272	-25.3296					-117.3	-0.14656	-0.23145
	-117.2	-29.012	-29.2358					-117.2	-29.012	-29.2358					-117.2	-0.14661	-0.23274
	-117.1	-27.5269	-26.3875					-117.1	-27.5269	-26.3875					-117.1	-0.14659	-0.23102
	-117	-28.2186	-26.3875					-117	-28.2186	-26.3875					-117	-0.14313	-0.23488
	-116.9	-27.8931	-26.8351					-116.9	-27.8931	-26.8351					-116.9	-0.14392	-0.23388
	-116.8	-27.4048	-26.1434					-116.8	-27.4048	-26.1434					-116.8	-0.1459	-0.23366
	-116.7	-27.4862	-27.3437					-116.7	-27.4862	-27.3437					-116.7	-0.14262	-0.23663
	-116.6	-27.5472	-25.6755					-116.6	-27.5472	-25.6755					-116.6	-0.13735	-0.23843
	-116.5	-26.9979	-26.591					-116.5	-26.9979	-26.591					-116.5	-0.14453	-0.23554
	-116.4	-26.7537	-26.2248					-116.4	-26.7537	-26.2248					-116.4	-0.14338	-0.23602
	-116.3	-26.8555	-25.7161					-116.3	-26.8555	-25.7161					-116.3	-0.14267	-0.23022
	-116.2	-26.8758	-24.6582					-116.2	-26.8758	-24.6582					-116.2	-0.14023	-0.23148
	-116.1	-27.2827	-25.3092					-116.1	-27.2827	-25.3092					-116.1	-0.14443	-0.23354
	-116	-27.4658	-24.9227					-116	-27.4658	-24.9227					-116	-0.14076	-0.22861
	-115.9	-26.9368	-25.2889					-115.9	-26.9368	-25.2889					-115.9	-0.14235	-0.22417
	-115.8	-26.5503	-25.2075					-115.8	-26.5503	-25.2075					-115.8	-0.13876	-0.23147
	-115.7	-27.8727	-26.1027					-115.7	-27.8727	-26.1027					-115.7	-0.14012	-0.22989
	-115.6	-27.0386	-26.8351					-115.6	-27.0386	-26.8351					-115.6	-0.14137	-0.23198
	-115.5	-28.0151	-24.8006					-115.5	-28.0151	-24.8006					-115.5	-0.14266	-0.23233
	-115.4	-28.6458	-25.3499					-115.4	-28.6458	-25.3499					-115.4	-0.14037	-0.22787
	-115.3	-28.6051	-24.5361					-115.3	-28.6051	-24.5361					-115.3	-0.14236	-0.23002
	-115.2	-28.5238	-24.7192					-115.2	-28.5238	-24.7192					-115.2	-0.14666	-0.22568
	-115.1	-27.5269	-24.821					-115.1	-27.5269	-24.821					-115.1	-0.1419	-0.22334
	-115	-27.2013	-23.8241					-115	-27.2013	-23.8241					-115	-0.13934	-0.2264
	-114.9	-27.8727	-24.5972					-114.9	-27.8727	-24.5972					-114.9	-0.14177	-0.22932
	-114.8	-27.3031	-24.2513					-114.8	-27.3031	-24.2513					-114.8	-0.14075	-0.23414
	-114.7	-27.3437	-24.5565					-114.7	-27.3437	-24.5565					-114.7	-0.13799	-0.23559
	-114.6	-27.1403	-24.6989					-114.6	-27.1403	-24.6989					-114.6	-0.13951	-0.23485
	-114.5	-26.2655	-24.6785					-114.5	-26.2655	-24.6785					-114.5	-0.14756	-0.23207
	-114.4	-25.9603	-25.4313					-114.4	-25.9603	-25.4313					-114.4	-0.14091	-0.23587
	-114.3	-26.9165	-24.0885					-114.3	-26.9165	-24.0885					-114.3	-0.13828	-0.22854
	-114.2	-26.8555	-25.9196					-114.2	-26.8555	-25.9196					-114.2	-0.1443	-0.2301
	-114.1	-26.2655	-24.6582					-114.1	-26.2655	-24.6582					-114.1	-0.13761	-0.22897
	-114	-27.0793	-25.0244					-114	-27.0793	-25.0244					-114	-0.13932	-0.22668
	-113.9	-26.1027	-24.3937					-113.9	-26.1027	-24.3937					-113.9	-0.14108	-0.22922
	-113.8	-26.8962	-25.1261					-113.8	-26.8962	-25.1261					-113.8	-0.13896	-0.23029
	-113.7	-25.6144	-24.5768					-113.7	-25.6144	-24.5768					-113.7	-0.14289	-0.22491
	-113.6	-27.2013	-24.292					-113.6	-27.2013	-24.292					-113.6	-0.14438	-0.22013
	-113.5	-28.7069	-23.7223					-113.5	-28.7069	-23.7223					-113.5	-0.14694	-0.22535
	-113.4	-26.1841	-25.1058					-113.4	-26.1841	-25.1058					-113.4	-0.14627	-0.22998
	-113.3	-26.001	-25.8789					-113.3	-26.001	-25.8789					-113.3	-0.14379	-0.23087
	-113.2	-26.6724	-24.0682					-113.2	-26.6724	-24.0682					-113.2	-0.14104	-0.23348
	-113.1	-27.0386	-25.3906					-113.1	-27.0386	-25.3906					-113.1	-0.13681	-0.23069
	-113	-26.7334	-25.2889					-113	-26.7334	-25.2889					-113	-0.13538	-0.22683
	-112.9	-26.123	-24.353					-112.9	-26.123	-24.353					-112.9	-0.13843	-0.2232
	-112.8	-27.0182	-23.4375					-112.8	-27.0182	-23.4375					-112.8	-0.13959	-0.22633
	-112.7	-26.7334	-24.882					-112.7	-26.7334	-24.882					-112.7	-0.14103	-0.22482
	-112.6	-26.2451	-24.292					-112.6	-26.2451	-24.292					-112.6	-0.14081	-0.22475
	-112.5	-26.0824	-22.9289					-112.5	-26.0824	-22.9289					-112.5	-0.13995	-0.22338
	-112.4	-26.5706	-25.411					-112.4	-26.5706	-25.411					-112.4	-0.14659	-0.22109
	-112.3	-25.9603	-23.5596					-112.3	-25.9603	-23.5596					-112.3	-0.14943	-0.22298
	-112.2	-25.9196	-23.9461					-112.2	-25.9196	-23.9461					-112.2	-0.14787	-0.22158
	-112.1	-26.6113	-24.4954					-112.1	-26.6113	-24.4954					-112.1	-0.14271	-0.22628
	-112	-25.8586	-23.9461					-112	-25.8586	-23.9461					-112	-0.14229	-0.21923
	-111.9	-25.7975	-23.2951					-111.9	-25.7975	-23.2951					-111.9	-0.14221	-0.22121
	-111.8	-25.2889	-23.5596					-111.8	-25.2889	-23.5596					-111.8	-0.1402	-0.22179
	-111.7	-25.9196	-24.0682					-111.7	-25.9196	-24.0682					-111.7	-0.14385	-0.22604
	-111.6	-26.062	-22.9492					-111.6	-26.062	-22.9492					-111.6	-0.14206	-0.22748
	-111.5	-26.3875	-23.7427					-111.5	-26.3875	-23.7427					-111.5	-0.14123	-0.21915
	-111.4	-26.591	-24.2106					-111.4	-26.591	-24.2106					-111.4	-0.14276	-0.21851
	-111.3	-25.7568	-23.3765					-111.3	-25.7568	-23.3765					-111.3	-0.14075	-0.22181
	-111.2	-25.3499	-22.9085					-111.2	-25.3499	-22.9085					-111.2	-0.14196	-0.2187
	-111.1	-26.7944	-24.1496					-111.1	-26.7944	-24.1496					-111.1	-0.13986	-0.21851
	-111	-25.2075	-23.0509					-111	-25.2075	-23.0509					-111	-0.14285	-0.22584
	-110.9	-25.3906	-23.7223					-110.9	-25.3906	-23.7223					-110.9	-0.14353	-0.22204
	-110.8	-25.1261	-24.6785					-110.8	-25.1261	-24.6785					-110.8	-0.14172	-0.22271
	-110.7	-25.9806	-24.7599					-110.7	-25.9806	-24.7599					-110.7	-0.14094	-0.21962
	-110.6	-25.9806	-23.5189					-110.6	-25.9806	-23.5189					-110.6	-0.14093	-0.2227
	-110.5	-25.4923	-23.4782					-110.5	-25.4923	-23.4782					-110.5	-0.14109	-0.2191
	-110.4	-24.9837	-23.2544					-110.4	-24.9837	-23.2544					-110.4	-0.14116	-0.22292
	-110.3	-23.6003	-24.7396					-110.3	-23.6003	-24.7396					-110.3	-0.14277	-0.21777
	-110.2	-24.6989	-24.6785					-110.2	-24.6989	-24.6785					-110.2	-0.14059	-0.21831
	-110.1	-25.4923	-24.7803					-110.1	-25.4923	-24.7803					-110.1	-0.1405	-0.22016
	-110	-24.9227	-23.4375					-110	-24.9227	-23.4375					-110	-0.14151	-0.21572
	-109.9	-24.7192	-24.6989					-109.9	-24.7192	-24.6989					-109.9	-0.14334	-0.22573
	-109.8	-24.5158	-24.5158					-109.8	-24.5158	-24.5158					-109.8	-0.13993	-0.22257
	-109.7	-24.8006	-24.6175					-109.7	-24.8006	-24.6175					-109.7	-0.14078	-0.21562
	-109.6	-24.5972	-25.4517					-109.6	-24.5972	-25.4517					-109.6	-0.14422	-0.218
	-109.5	-25.2482	-24.3123					-109.5	-25.2482	-24.3123					-109.5	-0.13994	-0.21987
	-109.4	-25.4923	-24.4751					-109.4	-25.4923	-24.4751					-109.4	-0.14122	-0.21519
	-109.3	-25.2279	-24.9227					-109.3	-25.2279	-24.9227					-109.3	-0.14271	-0.21607
	-109.2	-25.3703	-23.5392					-109.2	-25.3703	-23.5392					-109.2	-0.14081	-0.22026
	-109.1	-25.2279	-23.702					-109.1	-25.2279	-23.702					-109.1	-0.14614	-0.21972
	-109	-25.6958	-22.8271					-109	-25.6958	-22.8271					-109	-0.14736	-0.21761
	-108.9	-25.3296	-23.8851					-108.9	-25.3296	-23.8851					-108.9	-0.14475	-0.22685
	-108.8	-24.6989	-22.5627					-108.8	-24.6989	-22.5627					-108.8	-0.14273	-0.22083
	-108.7	-24.4141	-22.6847					-108.7	-24.4141	-22.6847					-108.7	-0.14056	-0.21521
	-108.6	-25.7975	-23.5189					-108.6	-25.7975	-23.5189					-108.6	-0.14038	-0.21399
	-108.5	-25.0651	-23.234					-108.5	-25.0651	-23.234					-108.5	-0.13759	-0.21639
	-108.4	-23.6206	-23.6206					-108.4	-23.6206	-23.6206					-108.4	-0.14166	-0.22024
	-108.3	-25.1058	-23.5799					-108.3	-25.1058	-23.5799					-108.3	-0.13937	-0.21727
	-108.2	-25.2279	-22.9899					-108.2	-25.2279	-22.9899					-108.2	-0.1412	-0.21512
	-108.1	-24.821	-22.7458					-108.1	-24.821	-22.7458					-108.1	-0.13742	-0.2118
	-108	-25.2482	-22.2778					-108	-25.2482	-22.2778					-108	-0.14446	-0.21598
	-107.9	-24.1089	-22.9696					-107.9	-24.1089	-22.9696					-107.9	-0.13915	-0.22142
	-107.8	-24.6989	-22.0947					-107.8	-24.6989	-22.0947					-107.8	-0.14	-0.21964
	-107.7	-24.5768	-22.7254					-107.7	-24.5768	-22.7254					-107.7	-0.13746	-0.22239
	-107.6	-24.4548	-22.9696					-107.6	-24.4548	-22.9696					-107.6	-0.13926	-0.22164
	-107.5	-24.4548	-23.763					-107.5	-24.4548	-23.763					-107.5	-0.14043	-0.21853
	-107.4	-24.882	-22.7865					-107.4	-24.882	-22.7865					-107.4	-0.14087	-0.21548
	-107.3	-23.5596	-23.3154					-107.3	-23.5596	-23.3154					-107.3	-0.14218	-0.21769
	-107.2	-23.6613	-22.8475					-107.2	-23.6613	-22.8475					-107.2	-0.1396	-0.22013
	-107.1	-24.7192	-21.9727					-107.1	-24.7192	-21.9727					-107.1	-0.1403	-0.21964
	-107	-23.6613	-23.0509					-107	-23.6613	-23.0509					-107	-0.13863	-0.21935
	-106.9	-25.0244	-22.1964					-106.9	-25.0244	-22.1964					-106.9	-0.13627	-0.21839
	-106.8	-23.8444	-21.8709					-106.8	-23.8444	-21.8709					-106.8	-0.13699	-0.21571
	-106.7	-24.4954	-22.4202					-106.7	-24.4954	-22.4202					-106.7	-0.13542	-0.21866
	-106.6	-24.5972	-22.7865					-106.6	-24.5972	-22.7865					-106.6	-0.13642	-0.21796
	-106.5	-24.2513	-23.3765					-106.5	-24.2513	-23.3765					-106.5	-0.13716	-0.21659
	-106.4	-25.1668	-22.2778					-106.4	-25.1668	-22.2778					-106.4	-0.13831	-0.21325
	-106.3	-24.2716	-22.9085					-106.3	-24.2716	-22.9085					-106.3	-0.13811	-0.21333
	-106.2	-24.8413	-22.3592					-106.2	-24.8413	-22.3592					-106.2	-0.14091	-0.21329
	-106.1	-25.7365	-21.3826					-106.1	-25.7365	-21.3826					-106.1	-0.14118	-0.21178
	-106	-23.4578	-22.1151					-106	-23.4578	-22.1151					-106	-0.13552	-0.21293
	-105.9	-23.8037	-21.7895					-105.9	-23.8037	-21.7895					-105.9	-0.13909	-0.21075
	-105.8	-24.3937	-22.1558					-105.8	-24.3937	-22.1558					-105.8	-0.14149	-0.21354
	-105.7	-24.2106	-23.3561					-105.7	-24.2106	-23.3561					-105.7	-0.14135	-0.2184
	-105.6	-25.2686	-21.2606					-105.6	-25.2686	-21.2606					-105.6	-0.13637	-0.219
	-105.5	-23.3358	-22.8068					-105.5	-23.3358	-22.8068					-105.5	-0.14041	-0.21637
	-105.4	-23.3765	-21.7692					-105.4	-23.3765	-21.7692					-105.4	-0.13936	-0.21886
	-105.3	-23.6206	-22.2371					-105.3	-23.6206	-22.2371					-105.3	-0.13325	-0.21969
	-105.2	-23.8851	-19.9381					-105.2	-23.8851	-19.9381					-105.2	-0.13452	-0.21272
	-105.1	-24.1496	-21.932					-105.1	-24.1496	-21.932					-105.1	-0.13894	-0.2129
	-105	-24.3734	-21.5454					-105	-24.3734	-21.5454					-105	-0.1375	-0.20639
	-104.9	-24.9837	-21.1792					-104.9	-24.9837	-21.1792					-104.9	-0.14007	-0.20799
	-104.8	-23.7834	-20.5485					-104.8	-23.7834	-20.5485					-104.8	-0.14206	-0.20898
	-104.7	-23.9258	-20.7316					-104.7	-23.9258	-20.7316					-104.7	-0.13783	-0.21131
	-104.6	-24.1903	-21.0978					-104.6	-24.1903	-21.0978					-104.6	-0.13819	-0.20464
	-104.5	-23.9054	-21.0571					-104.5	-23.9054	-21.0571					-104.5	-0.13879	-0.21023
	-104.4	-24.4344	-20.3044					-104.4	-24.4344	-20.3044					-104.4	-0.14134	-0.20991
	-104.3	-23.6409	-20.8333					-104.3	-23.6409	-20.8333					-104.3	-0.13793	-0.21388
	-104.2	-24.0885	-22.6644					-104.2	-24.0885	-22.6644					-104.2	-0.13789	-0.20681
	-104.1	-23.6613	-21.1792					-104.1	-23.6613	-21.1792					-104.1	-0.13766	-0.21001
	-104	-22.4202	-20.9351					-104	-22.4202	-20.9351					-104	-0.13693	-0.21376
	-103.9	-24.1496	-20.813					-103.9	-24.1496	-20.813					-103.9	-0.13851	-0.209
	-103.8	-23.5392	-21.3623					-103.8	-23.5392	-21.3623					-103.8	-0.13577	-0.20545
	-103.7	-22.7254	-21.8913					-103.7	-22.7254	-21.8913					-103.7	-0.1365	-0.20898
	-103.6	-23.3765	-21.8913					-103.6	-23.3765	-21.8913					-103.6	-0.13555	-0.20779
	-103.5	-23.1934	-21.3013					-103.5	-23.1934	-21.3013					-103.5	-0.13797	-0.21011
	-103.4	-23.0306	-21.0571					-103.4	-23.0306	-21.0571					-103.4	-0.14003	-0.21122
	-103.3	-23.4985	-22.6033					-103.3	-23.4985	-22.6033					-103.3	-0.13901	-0.21165
	-103.2	-22.3185	-21.9116					-103.2	-22.3185	-21.9116					-103.2	-0.13792	-0.21117
	-103.1	-23.9868	-21.5047					-103.1	-23.9868	-21.5047					-103.1	-0.13996	-0.2106
	-103	-24.3327	-20.9554					-103	-24.3327	-20.9554					-103	-0.13834	-0.20955
	-102.9	-22.3796	-20.2433					-102.9	-22.3796	-20.2433					-102.9	-0.14136	-0.20591
	-102.8	-24.0682	-20.8944					-102.8	-24.0682	-20.8944					-102.8	-0.13612	-0.20869
	-102.7	-22.9492	-21.5454					-102.7	-22.9492	-21.5454					-102.7	-0.13617	-0.20845
	-102.6	-23.4985	-20.1213					-102.6	-23.4985	-20.1213					-102.6	-0.13468	-0.21025
	-102.5	-23.0916	-21.4844					-102.5	-23.0916	-21.4844					-102.5	-0.13704	-0.20781
	-102.4	-21.9727	-20.8944					-102.4	-21.9727	-20.8944					-102.4	-0.13684	-0.20876
	-102.3	-22.4406	-21.1385					-102.3	-22.4406	-21.1385					-102.3	-0.13604	-0.20841
	-102.2	-23.3358	-19.1243					-102.2	-23.3358	-19.1243					-102.2	-0.1398	-0.20269
	-102.1	-22.054	-21.6471					-102.1	-22.054	-21.6471					-102.1	-0.13901	-0.20646
	-102	-23.0306	-21.2809					-102	-23.0306	-21.2809					-102	-0.13952	-0.20822
	-101.9	-22.2168	-21.1182					-101.9	-22.2168	-21.1182					-101.9	-0.13992	-0.20889
	-101.8	-22.2982	-20.9554					-101.8	-22.2982	-20.9554					-101.8	-0.14043	-0.20562
	-101.7	-23.1323	-20.5688					-101.7	-23.1323	-20.5688					-101.7	-0.13887	-0.21099
	-101.6	-22.8068	-19.8771					-101.6	-22.8068	-19.8771					-101.6	-0.13744	-0.20679
	-101.5	-22.4406	-19.4702					-101.5	-22.4406	-19.4702					-101.5	-0.13723	-0.20931
	-101.4	-21.9727	-19.9992					-101.4	-21.9727	-19.9992					-101.4	-0.13418	-0.2078
	-101.3	-21.932	-20.6299					-101.3	-21.932	-20.6299					-101.3	-0.13758	-0.20684
	-101.2	-22.3389	-19.6126					-101.2	-22.3389	-19.6126					-101.2	-0.13769	-0.20804
	-101.1	-23.0713	-20.5688					-101.1	-23.0713	-20.5688					-101.1	-0.13589	-0.2029
	-101	-21.5861	-19.4906					-101	-21.5861	-19.4906					-101	-0.13921	-0.21318
	-100.9	-22.2575	-20.4875					-100.9	-22.2575	-20.4875					-100.9	-0.13763	-0.20302
	-100.8	-21.464	-19.3481					-100.8	-21.464	-19.3481					-100.8	-0.1395	-0.20782
	-100.7	-22.8068	-19.7347					-100.7	-22.8068	-19.7347					-100.7	-0.13853	-0.20601
	-100.6	-22.9085	-19.9178					-100.6	-22.9085	-19.9178					-100.6	-0.13779	-0.20474
	-100.5	-21.9116	-20.9351					-100.5	-21.9116	-20.9351					-100.5	-0.13543	-0.20311
	-100.4	-20.9554	-21.0368					-100.4	-20.9554	-21.0368					-100.4	-0.13509	-0.20288
	-100.3	-21.0978	-20.1619					-100.3	-21.0978	-20.1619					-100.3	-0.13951	-0.20363
	-100.2	-21.7895	-19.9178					-100.2	-21.7895	-19.9178					-100.2	-0.13885	-0.1977
	-100.1	-21.7895	-19.1243					-100.1	-21.7895	-19.1243					-100.1	-0.13344	-0.20788
	-100	-20.7113	-20.223					-100	-20.7113	-20.223					-100	-0.13405	-0.20241
	-99.9	-20.2637	-19.5719					-99.9	-20.2637	-19.5719					-99.9	-0.13546	-0.20438
	-99.8	-21.3216	-20.5485					-99.8	-21.3216	-20.5485					-99.8	-0.13215	-0.20797
	-99.7	-21.5861	-19.8161					-99.7	-21.5861	-19.8161					-99.7	-0.13099	-0.20766
	-99.6	-21.0978	-20.0195					-99.6	-21.0978	-20.0195					-99.6	-0.13673	-0.20797
	-99.5	-22.1354	-20.284					-99.5	-22.1354	-20.284					-99.5	-0.13679	-0.20466
	-99.4	-21.0164	-19.2871					-99.4	-21.0164	-19.2871					-99.4	-0.13604	-0.19948
	-99.3	-21.4437	-19.9178					-99.3	-21.4437	-19.9178					-99.3	-0.13763	-0.20511
	-99.2	-22.0337	-18.7988					-99.2	-22.0337	-18.7988					-99.2	-0.13557	-0.20457
	-99.1	-21.6675	-19.0023					-99.1	-21.6675	-19.0023					-99.1	-0.13415	-0.20556
	-99	-21.7082	-19.6533					-99	-21.7082	-19.6533					-99	-0.13237	-0.20215
	-98.9	-22.1151	-19.8975					-98.9	-22.1151	-19.8975					-98.9	-0.13401	-0.20827
	-98.8	-21.6878	-19.5516					-98.8	-21.6878	-19.5516					-98.8	-0.13294	-0.1995
	-98.7	-21.464	-19.7347					-98.7	-21.464	-19.7347					-98.7	-0.13917	-0.2033
	-98.6	-20.4264	-18.7581					-98.6	-20.4264	-18.7581					-98.6	-0.13344	-0.20051
	-98.5	-21.5047	-19.694					-98.5	-21.5047	-19.694					-98.5	-0.13465	-0.20077
	-98.4	-21.2199	-19.9178					-98.4	-21.2199	-19.9178					-98.4	-0.13517	-0.19793
	-98.3	-20.3654	-18.453					-98.3	-20.3654	-18.453					-98.3	-0.13883	-0.20145
	-98.2	-21.9727	-18.8802					-98.2	-21.9727	-18.8802					-98.2	-0.13569	-0.20184
	-98.1	-20.6095	-18.9412					-98.1	-20.6095	-18.9412					-98.1	-0.13378	-0.19844
	-98	-21.3623	-19.165					-98	-21.3623	-19.165					-98	-0.1335	-0.20051
	-97.9	-21.0164	-19.0837					-97.9	-21.0164	-19.0837					-97.9	-0.13391	-0.2068
	-97.8	-20.1213	-18.5954					-97.8	-20.1213	-18.5954					-97.8	-0.13902	-0.19875
	-97.7	-21.1182	-19.6737					-97.7	-21.1182	-19.6737					-97.7	-0.13738	-0.1998
	-97.6	-20.8944	-19.3481					-97.6	-20.8944	-19.3481					-97.6	-0.13366	-0.1981
	-97.5	-20.813	-19.5923					-97.5	-20.813	-19.5923					-97.5	-0.1343	-0.20184
	-97.4	-20.3044	-20.0602					-97.4	-20.3044	-20.0602					-97.4	-0.1372	-0.2
	-97.3	-20.4264	-18.5343					-97.3	-20.4264	-18.5343					-97.3	-0.1374	-0.1999
	-97.2	-20.9147	-18.7174					-97.2	-20.9147	-18.7174					-97.2	-0.13282	-0.19808
	-97.1	-21.2606	-18.575					-97.1	-21.2606	-18.575					-97.1	-0.13575	-0.20001
	-97	-21.2606	-18.5343					-97	-21.2606	-18.5343					-97	-0.13581	-0.19951
	-96.9	-21.1385	-19.2057					-96.9	-21.1385	-19.2057					-96.9	-0.13905	-0.19769
	-96.8	-20.5892	-19.4906					-96.8	-20.5892	-19.4906					-96.8	-0.13938	-0.19743
	-96.7	-20.6909	-18.2495					-96.7	-20.6909	-18.2495					-96.7	-0.13563	-0.19773
	-96.6	-20.5485	-19.7957					-96.6	-20.5485	-19.7957					-96.6	-0.13614	-0.19773
	-96.5	-21.0978	-18.9006					-96.5	-21.0978	-18.9006					-96.5	-0.13566	-0.19956
	-96.4	-19.9178	-19.0633					-96.4	-19.9178	-19.0633					-96.4	-0.13677	-0.19729
	-96.3	-21.2199	-19.1243					-96.3	-21.2199	-19.1243					-96.3	-0.13537	-0.19646
	-96.2	-21.3826	-19.3075					-96.2	-21.3826	-19.3075					-96.2	-0.13726	-0.19197
	-96.1	-20.6095	-17.924					-96.1	-20.6095	-17.924					-96.1	-0.13422	-0.196
	-96	-20.5282	-19.3278					-96	-20.5282	-19.3278					-96	-0.14059	-0.19374
	-95.9	-20.1416	-18.2292					-95.9	-20.1416	-18.2292					-95.9	-0.13744	-0.19674
	-95.8	-21.0571	-18.1681					-95.8	-21.0571	-18.1681					-95.8	-0.14054	-0.19787
	-95.7	-21.5251	-18.2088					-95.7	-21.5251	-18.2088					-95.7	-0.14326	-0.19723
	-95.6	-20.2637	-19.0023					-95.6	-20.2637	-19.0023					-95.6	-0.14142	-0.19534
	-95.5	-21.0571	-19.0023					-95.5	-21.0571	-19.0023					-95.5	-0.13845	-0.19668
	-95.4	-20.5078	-18.6157					-95.4	-20.5078	-18.6157					-95.4	-0.13844	-0.19338
	-95.3	-20.5892	-19.0023					-95.3	-20.5892	-19.0023					-95.3	-0.136	-0.19444
	-95.2	-19.8771	-16.866					-95.2	-19.8771	-16.866					-95.2	-0.13949	-0.1971
	-95.1	-20.2637	-18.5954					-95.1	-20.2637	-18.5954					-95.1	-0.1361	-0.19566
	-95	-19.7957	-18.2292					-95	-19.7957	-18.2292					-95	-0.13717	-0.19284
	-94.9	-20.2026	-18.3309					-94.9	-20.2026	-18.3309					-94.9	-0.13652	-0.19189
	-94.8	-19.755	-18.3309					-94.8	-19.755	-18.3309					-94.8	-0.13448	-0.19346
	-94.7	-20.752	-17.5578					-94.7	-20.752	-17.5578					-94.7	-0.13412	-0.19663
	-94.6	-19.7957	-18.5547					-94.6	-19.7957	-18.5547					-94.6	-0.13653	-0.19384
	-94.5	-19.165	-17.395					-94.5	-19.165	-17.395					-94.5	-0.13828	-0.1968
	-94.4	-19.4092	-18.2292					-94.4	-19.4092	-18.2292					-94.4	-0.13814	-0.19616
	-94.3	-19.7754	-18.7988					-94.3	-19.7754	-18.7988					-94.3	-0.13589	-0.19506
	-94.2	-18.6564	-18.6361					-94.2	-18.6564	-18.6361					-94.2	-0.13635	-0.19768
	-94.1	-19.9992	-17.395					-94.1	-19.9992	-17.395					-94.1	-0.13262	-0.18965
	-94	-19.0226	-17.5374					-94	-19.0226	-17.5374					-94	-0.13388	-0.19091
	-93.9	-18.7988	-18.5547					-93.9	-18.7988	-18.5547					-93.9	-0.13804	-0.19044
	-93.8	-19.9178	-18.1071					-93.8	-19.9178	-18.1071					-93.8	-0.1365	-0.19073
	-93.7	-18.4937	-17.0288					-93.7	-18.4937	-17.0288					-93.7	-0.13684	-0.19137
	-93.6	-19.2464	-18.6564					-93.6	-19.2464	-18.6564					-93.6	-0.13596	-0.19096
	-93.5	-20.0806	-17.6798					-93.5	-20.0806	-17.6798					-93.5	-0.1352	-0.19336
	-93.4	-18.7785	-17.7002					-93.4	-18.7785	-17.7002					-93.4	-0.13302	-0.19021
	-93.3	-19.1447	-18.514					-93.3	-19.1447	-18.514					-93.3	-0.13413	-0.1832
	-93.2	-18.9616	-18.7581					-93.2	-18.9616	-18.7581					-93.2	-0.13333	-0.18904
	-93.1	-19.165	-17.7612					-93.1	-19.165	-17.7612					-93.1	-0.13699	-0.18798
	-93	-18.2902	-18.2292					-93	-18.2902	-18.2292					-93	-0.13711	-0.1856
	-92.9	-19.2057	-18.2292					-92.9	-19.2057	-18.2292					-92.9	-0.13965	-0.18839
	-92.8	-19.7347	-17.5985					-92.8	-19.7347	-17.5985					-92.8	-0.13923	-0.18914
	-92.7	-18.7581	-17.7205					-92.7	-18.7581	-17.7205					-92.7	-0.13791	-0.18979
	-92.6	-18.9209	-17.5781					-92.6	-18.9209	-17.5781					-92.6	-0.13826	-0.18832
	-92.5	-18.4326	-17.1102					-92.5	-18.4326	-17.1102					-92.5	-0.13816	-0.19189
	-92.4	-18.8599	-17.2526					-92.4	-18.8599	-17.2526					-92.4	-0.13622	-0.19446
	-92.3	-18.6564	-17.4154					-92.3	-18.6564	-17.4154					-92.3	-0.13823	-0.18893
	-92.2	-18.8395	-17.6392					-92.2	-18.8395	-17.6392					-92.2	-0.13482	-0.19072
	-92.1	-18.2699	-17.8426					-92.1	-18.2699	-17.8426					-92.1	-0.13411	-0.19084
	-92	-19.5923	-17.4357					-92	-19.5923	-17.4357					-92	-0.13379	-0.18426
	-91.9	-19.165	-17.7002					-91.9	-19.165	-17.7002					-91.9	-0.13745	-0.18981
	-91.8	-18.6971	-17.863					-91.8	-18.6971	-17.863					-91.8	-0.1332	-0.1903
	-91.7	-19.0023	-17.3136					-91.7	-19.0023	-17.3136					-91.7	-0.13433	-0.18882
	-91.6	-18.2699	-17.1712					-91.6	-18.2699	-17.1712					-91.6	-0.13248	-0.18659
	-91.5	-19.1854	-16.0726					-91.5	-19.1854	-16.0726					-91.5	-0.13466	-0.18527
	-91.4	-18.3919	-17.1916					-91.4	-18.3919	-17.1916					-91.4	-0.13425	-0.1809
	-91.3	-18.7378	-17.2119					-91.3	-18.7378	-17.2119					-91.3	-0.13576	-0.1855
	-91.2	-18.6971	-17.0288					-91.2	-18.6971	-17.0288					-91.2	-0.13367	-0.18315
	-91.1	-17.6188	-17.5781					-91.1	-17.6188	-17.5781					-91.1	-0.13791	-0.18863
	-91	-17.6798	-17.2729					-91	-17.6798	-17.2729					-91	-0.13256	-0.19157
	-90.9	-17.6595	-16.4185					-90.9	-17.6595	-16.4185					-90.9	-0.13692	-0.18724
	-90.8	-17.6798	-17.0492					-90.8	-17.6798	-17.0492					-90.8	-0.13623	-0.18559
	-90.7	-17.5781	-16.1336					-90.7	-17.5781	-16.1336					-90.7	-0.13352	-0.18055
	-90.6	-18.7581	-17.0898					-90.6	-18.7581	-17.0898					-90.6	-0.13382	-0.18207
	-90.5	-17.5985	-17.0898					-90.5	-17.5985	-17.0898					-90.5	-0.13218	-0.18826
	-90.4	-18.3105	-16.1336					-90.4	-18.3105	-16.1336					-90.4	-0.134	-0.18576
	-90.3	-17.0085	-17.4154					-90.3	-17.0085	-17.4154					-90.3	-0.13198	-0.18449
	-90.2	-17.8223	-16.3778					-90.2	-17.8223	-16.3778					-90.2	-0.13447	-0.18671
	-90.1	-17.9443	-17.4967					-90.1	-17.9443	-17.4967					-90.1	-0.13104	-0.18493
	-90	-18.5954	-16.805					-90	-18.5954	-16.805					-90	-0.13033	-0.18551
	-89.9	-17.7612	-18.2088					-89.9	-17.7612	-18.2088					-89.9	-0.13146	-0.18449
	-89.8	-17.6392	-16.5609					-89.8	-17.6392	-16.5609					-89.8	-0.13347	-0.18483
	-89.7	-16.3778	-16.9271					-89.7	-16.3778	-16.9271					-89.7	-0.13345	-0.18551
	-89.6	-18.5547	-16.9271					-89.6	-18.5547	-16.9271					-89.6	-0.12963	-0.18358
	-89.5	-17.863	-16.6423					-89.5	-17.863	-16.6423					-89.5	-0.13404	-0.18501
	-89.4	-18.5954	-15.3809					-89.4	-18.5954	-15.3809					-89.4	-0.13216	-0.17718
	-89.3	-17.9443	-16.0116					-89.3	-17.9443	-16.0116					-89.3	-0.13227	-0.18009
	-89.2	-17.0492	-16.4591					-89.2	-17.0492	-16.4591					-89.2	-0.13161	-0.18367
	-89.1	-17.5578	-16.3371					-89.1	-17.5578	-16.3371					-89.1	-0.13278	-0.1889
	-89	-17.8833	-16.5405					-89	-17.8833	-16.5405					-89	-0.12809	-0.18214
	-88.9	-17.1712	-15.2995					-88.9	-17.1712	-15.2995					-88.9	-0.1327	-0.18126
	-88.8	-18.2088	-16.2557					-88.8	-18.2088	-16.2557					-88.8	-0.13096	-0.18469
	-88.7	-17.7612	-16.5812					-88.7	-17.7612	-16.5812					-88.7	-0.13118	-0.19126
	-88.6	-18.1681	-17.334					-88.6	-18.1681	-17.334					-88.6	-0.12922	-0.18203
	-88.5	-17.5578	-16.0116					-88.5	-17.5578	-16.0116					-88.5	-0.12968	-0.18229
	-88.4	-17.3747	-15.625					-88.4	-17.3747	-15.625					-88.4	-0.12901	-0.18327
	-88.3	-17.7205	-16.3981					-88.3	-17.7205	-16.3981					-88.3	-0.1292	-0.18073
	-88.2	-17.395	-13.8143					-88.2	-17.395	-13.8143					-88.2	-0.13034	-0.18152
	-88.1	-17.1305	-15.4826					-88.1	-17.1305	-15.4826					-88.1	-0.13286	-0.18308
	-88	-17.5374	-16.5405					-88	-17.5374	-16.5405					-88	-0.13178	-0.1845
	-87.9	-15.9709	-15.6657					-87.9	-15.9709	-15.6657					-87.9	-0.13257	-0.18431
	-87.8	-16.7033	-16.1336					-87.8	-16.7033	-16.1336					-87.8	-0.132	-0.18372
	-87.7	-17.1509	-16.3981					-87.7	-17.1509	-16.3981					-87.7	-0.13425	-0.18325
	-87.6	-18.0461	-16.9474					-87.6	-18.0461	-16.9474					-87.6	-0.1322	-0.18326
	-87.5	-16.9067	-15.7878					-87.5	-16.9067	-15.7878					-87.5	-0.13666	-0.18058
	-87.4	-17.1916	-15.8895					-87.4	-17.1916	-15.8895					-87.4	-0.13514	-0.1816
	-87.3	-16.9881	-15.7267					-87.3	-16.9881	-15.7267					-87.3	-0.1329	-0.18244
	-87.2	-17.3543	-15.9302					-87.2	-17.3543	-15.9302					-87.2	-0.13469	-0.18065
	-87.1	-16.2353	-15.9912					-87.1	-16.2353	-15.9912					-87.1	-0.13457	-0.17865
	-87	-16.7033	-16.4591					-87	-16.7033	-16.4591					-87	-0.13539	-0.18218
	-86.9	-16.866	-15.7674					-86.9	-16.866	-15.7674					-86.9	-0.12933	-0.18315
	-86.8	-16.2353	-17.4764					-86.8	-16.2353	-17.4764					-86.8	-0.13211	-0.18096
	-86.7	-17.4561	-17.2933					-86.7	-17.4561	-17.2933					-86.7	-0.13384	-0.18354
	-86.6	-16.7033	-15.6453					-86.6	-16.7033	-15.6453					-86.6	-0.13098	-0.18538
	-86.5	-17.2729	-16.7236					-86.5	-17.2729	-16.7236					-86.5	-0.12816	-0.17989
	-86.4	-16.5812	-16.8864					-86.4	-16.5812	-16.8864					-86.4	-0.13033	-0.18244
	-86.3	-16.5202	-16.7643					-86.3	-16.5202	-16.7643					-86.3	-0.12869	-0.18076
	-86.2	-16.0929	-16.5202					-86.2	-16.0929	-16.5202					-86.2	-0.13263	-0.17741
	-86.1	-16.3371	-15.7267					-86.1	-16.3371	-15.7267					-86.1	-0.12935	-0.17877
	-86	-16.6016	-15.686					-86	-16.6016	-15.686					-86	-0.13207	-0.17755
	-85.9	-17.1712	-15.3198					-85.9	-17.1712	-15.3198					-85.9	-0.13008	-0.17624
	-85.8	-17.1102	-15.2384					-85.8	-17.1102	-15.2384					-85.8	-0.12806	-0.1767
	-85.7	-16.4185	-15.0757					-85.7	-16.4185	-15.0757					-85.7	-0.13307	-0.17953
	-85.6	-16.5202	-15.9302					-85.6	-16.5202	-15.9302					-85.6	-0.12528	-0.17497
	-85.5	-16.1743	-15.4622					-85.5	-16.1743	-15.4622					-85.5	-0.12902	-0.18101
	-85.4	-16.1743	-15.5436					-85.4	-16.1743	-15.5436					-85.4	-0.12993	-0.17519
	-85.3	-16.0522	-14.8315					-85.3	-16.0522	-14.8315					-85.3	-0.12556	-0.17538
	-85.2	-16.805	-13.8957					-85.2	-16.805	-13.8957					-85.2	-0.1283	-0.17395
	-85.1	-16.4795	-15.0146					-85.1	-16.4795	-15.0146					-85.1	-0.12693	-0.17651
	-85	-15.625	-15.4419					-85	-15.625	-15.4419					-85	-0.12261	-0.17408
	-84.9	-16.9474	-14.6077					-84.9	-16.9474	-14.6077					-84.9	-0.12817	-0.17349
	-84.8	-17.0492	-15.1367					-84.8	-17.0492	-15.1367					-84.8	-0.12721	-0.1806
	-84.7	-15.7064	-14.1195					-84.7	-15.7064	-14.1195					-84.7	-0.12612	-0.16602
	-84.6	-16.4185	-15.1978					-84.6	-16.4185	-15.1978					-84.6	-0.12805	-0.17475
	-84.5	-16.1133	-15.2181					-84.5	-16.1133	-15.2181					-84.5	-0.12992	-0.17436
	-84.4	-15.5233	-15.8081					-84.4	-15.5233	-15.8081					-84.4	-0.12529	-0.1771
	-84.3	-16.7847	-15.096					-84.3	-16.7847	-15.096					-84.3	-0.12631	-0.17488
	-84.2	-15.5029	-15.2588					-84.2	-15.5029	-15.2588					-84.2	-0.12791	-0.17492
	-84.1	-15.6453	-15.3809					-84.1	-15.6453	-15.3809					-84.1	-0.12445	-0.17352
	-84	-15.2588	-16.1133					-84	-15.2588	-16.1133					-84	-0.12454	-0.16919
	-83.9	-15.2384	-14.8315					-83.9	-15.2384	-14.8315					-83.9	-0.12552	-0.17212
	-83.8	-16.0726	-15.2588					-83.8	-16.0726	-15.2588					-83.8	-0.12231	-0.17397
	-83.7	-15.3198	-14.3636					-83.7	-15.3198	-14.3636					-83.7	-0.12309	-0.17177
	-83.6	-15.035	-15.4622					-83.6	-15.035	-15.4622					-83.6	-0.1246	-0.16913
	-83.5	-16.2557	-16.276					-83.5	-16.2557	-16.276					-83.5	-0.12656	-0.17445
	-83.4	-14.8315	-14.8315					-83.4	-14.8315	-14.8315					-83.4	-0.12499	-0.17365
	-83.3	-14.6688	-16.4795					-83.3	-14.6688	-16.4795					-83.3	-0.12578	-0.17321
	-83.2	-14.8722	-14.384					-83.2	-14.8722	-14.384					-83.2	-0.12686	-0.17443
	-83.1	-15.8895	-16.3981					-83.1	-15.8895	-16.3981					-83.1	-0.12611	-0.17234
	-83	-14.8926	-15.5843					-83	-14.8926	-15.5843					-83	-0.12236	-0.17538
	-82.9	-15.9505	-14.4857					-82.9	-15.9505	-14.4857					-82.9	-0.12423	-0.17436
	-82.8	-14.4043	-15.1978					-82.8	-14.4043	-15.1978					-82.8	-0.12254	-0.17274
	-82.7	-15.7267	-14.4653					-82.7	-15.7267	-14.4653					-82.7	-0.1252	-0.17001
	-82.6	-15.564	-14.2008					-82.6	-15.564	-14.2008					-82.6	-0.12577	-0.17021
	-82.5	-15.1571	-14.4043					-82.5	-15.1571	-14.4043					-82.5	-0.131	-0.17224
	-82.4	-16.2353	-14.0584					-82.4	-16.2353	-14.0584					-82.4	-0.12405	-0.17303
	-82.3	-15.1367	-14.0991					-82.3	-15.1367	-14.0991					-82.3	-0.1228	-0.17292
	-82.2	-16.3574	-14.2822					-82.2	-16.3574	-14.2822					-82.2	-0.13196	-0.17173
	-82.1	-14.8315	-14.7095					-82.1	-14.8315	-14.7095					-82.1	-0.12524	-0.17056
	-82	-14.4857	-16.2353					-82	-14.4857	-16.2353					-82	-0.12442	-0.1701
	-81.9	-15.5233	-14.445					-81.9	-15.5233	-14.445					-81.9	-0.12359	-0.16805
	-81.8	-15.7064	-13.9567					-81.8	-15.7064	-13.9567					-81.8	-0.12484	-0.1701
	-81.7	-15.2791	-14.2619					-81.7	-15.2791	-14.2619					-81.7	-0.12645	-0.16676
	-81.6	-15.1571	-13.5091					-81.6	-15.1571	-13.5091					-81.6	-0.12333	-0.16864
	-81.5	-14.7705	-13.9567					-81.5	-14.7705	-13.9567					-81.5	-0.12043	-0.17334
	-81.4	-16.2353	-13.7939					-81.4	-16.2353	-13.7939					-81.4	-0.12546	-0.17207
	-81.3	-15.1571	-14.384					-81.3	-15.1571	-14.384					-81.3	-0.12651	-0.17163
	-81.2	-14.5874	-13.4481					-81.2	-14.5874	-13.4481					-81.2	-0.12363	-0.17413
	-81.1	-14.7705	-14.0177					-81.1	-14.7705	-14.0177					-81.1	-0.1237	-0.16927
	-81	-14.3636	-13.1429					-81	-14.3636	-13.1429					-81	-0.12191	-0.1697
	-80.9	-13.7533	-14.7909					-80.9	-13.7533	-14.7909					-80.9	-0.122	-0.17335
	-80.8	-14.8722	-14.0788					-80.8	-14.8722	-14.0788					-80.8	-0.12343	-0.17019
	-80.7	-14.2212	-14.7095					-80.7	-14.2212	-14.7095					-80.7	-0.12278	-0.16629
	-80.6	-14.8315	-13.7533					-80.6	-14.8315	-13.7533					-80.6	-0.12267	-0.16502
	-80.5	-15.1978	-14.9333					-80.5	-15.1978	-14.9333					-80.5	-0.1232	-0.16879
	-80.4	-14.1602	-14.0381					-80.4	-14.1602	-14.0381					-80.4	-0.12469	-0.16961
	-80.3	-14.5874	-13.6312					-80.3	-14.5874	-13.6312					-80.3	-0.12144	-0.16462
	-80.2	-14.9943	-14.4043					-80.2	-14.9943	-14.4043					-80.2	-0.1233	-0.16492
	-80.1	-14.7095	-13.977					-80.1	-14.7095	-13.977					-80.1	-0.12409	-0.16614
	-80	-14.3026	-12.9191					-80	-14.3026	-12.9191					-80	-0.1257	-0.16342
	-79.9	-14.2822	-14.4043					-79.9	-14.2822	-14.4043					-79.9	-0.12611	-0.1658
	-79.8	-13.8143	-14.7502					-79.8	-13.8143	-14.7502					-79.8	-0.12196	-0.16331
	-79.7	-14.7909	-13.6922					-79.7	-14.7909	-13.6922					-79.7	-0.12777	-0.1633
	-79.6	-15.096	-13.6922					-79.6	-15.096	-13.6922					-79.6	-0.12431	-0.16134
	-79.5	-14.1805	-14.4653					-79.5	-14.1805	-14.4653					-79.5	-0.12334	-0.16352
	-79.4	-14.3026	-13.6719					-79.4	-14.3026	-13.6719					-79.4	-0.12436	-0.16519
	-79.3	-15.4419	-13.7329					-79.3	-15.4419	-13.7329					-79.3	-0.12348	-0.1641
	-79.2	-14.5264	-13.855					-79.2	-14.5264	-13.855					-79.2	-0.12057	-0.16496
	-79.1	-15.2384	-14.3636					-79.1	-15.2384	-14.3636					-79.1	-0.12252	-0.16405
	-79	-14.4653	-13.2243					-79	-14.4653	-13.2243					-79	-0.12517	-0.16352
	-78.9	-13.9567	-14.7095					-78.9	-13.9567	-14.7095					-78.9	-0.12336	-0.16367
	-78.8	-13.8143	-14.1195					-78.8	-13.8143	-14.1195					-78.8	-0.12411	-0.16925
	-78.7	-14.7909	-14.9333					-78.7	-14.7909	-14.9333					-78.7	-0.12333	-0.1628
	-78.6	-13.9567	-12.7563					-78.6	-13.9567	-12.7563					-78.6	-0.12336	-0.16403
	-78.5	-14.8315	-13.5091					-78.5	-14.8315	-13.5091					-78.5	-0.12156	-0.15958
	-78.4	-14.5874	-12.6953					-78.4	-14.5874	-12.6953					-78.4	-0.12347	-0.16337
	-78.3	-14.506	-13.2446					-78.3	-14.506	-13.2446					-78.3	-0.12393	-0.16252
	-78.2	-14.0584	-12.4512					-78.2	-14.0584	-12.4512					-78.2	-0.12011	-0.16217
	-78.1	-14.1195	-12.7157					-78.1	-14.1195	-12.7157					-78.1	-0.1197	-0.16213
	-78	-14.4246	-13.4074					-78	-14.4246	-13.4074					-78	-0.12183	-0.16805
	-77.9	-14.4043	-12.3901					-77.9	-14.4043	-12.3901					-77.9	-0.11881	-0.16305
	-77.8	-14.4043	-12.8581					-77.8	-14.4043	-12.8581					-77.8	-0.1202	-0.16558
	-77.7	-12.4512	-12.7157					-77.7	-12.4512	-12.7157					-77.7	-0.12166	-0.16215
	-77.6	-13.6922	-13.4074					-77.6	-13.6922	-13.4074					-77.6	-0.12276	-0.15887
	-77.5	-13.7329	-13.4888					-77.5	-13.7329	-13.4888					-77.5	-0.12291	-0.16286
	-77.4	-14.8926	-14.6281					-77.4	-14.8926	-14.6281					-77.4	-0.12544	-0.15927
	-77.3	-14.0381	-14.2822					-77.3	-14.0381	-14.2822					-77.3	-0.12042	-0.15999
	-77.2	-12.8784	-14.0177					-77.2	-12.8784	-14.0177					-77.2	-0.11872	-0.15686
	-77.1	-13.5701	-13.5295					-77.1	-13.5701	-13.5295					-77.1	-0.12075	-0.15769
	-77	-13.265	-13.0208					-77	-13.265	-13.0208					-77	-0.11967	-0.1613
	-76.9	-13.1632	-12.9598					-76.9	-13.1632	-12.9598					-76.9	-0.12035	-0.15789
	-76.8	-12.3494	-12.9395					-76.8	-12.3494	-12.9395					-76.8	-0.12431	-0.15887
	-76.7	-12.2884	-13.9567					-76.7	-12.2884	-13.9567					-76.7	-0.12236	-0.16063
	-76.6	-13.6515	-12.9801					-76.6	-13.6515	-12.9801					-76.6	-0.12232	-0.16086
	-76.5	-13.8346	-12.6343					-76.5	-13.8346	-12.6343					-76.5	-0.12125	-0.1574
	-76.4	-12.6139	-12.5529					-76.4	-12.6139	-12.5529					-76.4	-0.12498	-0.15526
	-76.3	-13.2039	-14.3433					-76.3	-13.2039	-14.3433					-76.3	-0.12103	-0.15609
	-76.2	-13.6922	-12.8581					-76.2	-13.6922	-12.8581					-76.2	-0.12062	-0.15601
	-76.1	-12.9598	-12.7157					-76.1	-12.9598	-12.7157					-76.1	-0.1197	-0.15496
	-76	-14.1602	-12.8377					-76	-14.1602	-12.8377					-76	-0.12239	-0.15459
	-75.9	-13.1632	-13.0208					-75.9	-13.1632	-13.0208					-75.9	-0.12137	-0.15255
	-75.8	-13.4277	-11.8612					-75.8	-13.4277	-11.8612					-75.8	-0.12358	-0.15559
	-75.7	-13.4074	-13.1632					-75.7	-13.4074	-13.1632					-75.7	-0.12048	-0.15401
	-75.6	-13.5498	-12.8784					-75.6	-13.5498	-12.8784					-75.6	-0.12134	-0.16108
	-75.5	-12.8784	-12.9801					-75.5	-12.8784	-12.9801					-75.5	-0.12279	-0.15483
	-75.4	-13.0208	-14.0788					-75.4	-13.0208	-14.0788					-75.4	-0.12164	-0.1599
	-75.3	-12.9191	-11.5763					-75.3	-12.9191	-11.5763					-75.3	-0.12287	-0.16177
	-75.2	-12.8988	-13.1836					-75.2	-12.8988	-13.1836					-75.2	-0.12323	-0.15331
	-75.1	-14.1805	-13.1632					-75.1	-14.1805	-13.1632					-75.1	-0.12352	-0.15492
	-75	-13.2243	-12.9395					-75	-13.2243	-12.9395					-75	-0.12102	-0.15416
	-74.9	-13.326	-11.8205					-74.9	-13.326	-11.8205					-74.9	-0.11903	-0.15449
	-74.8	-12.085	-12.2477					-74.8	-12.085	-12.2477					-74.8	-0.12232	-0.15634
	-74.7	-13.2039	-12.5326					-74.7	-13.2039	-12.5326					-74.7	-0.12184	-0.15386
	-74.6	-12.0443	-11.9019					-74.6	-12.0443	-11.9019					-74.6	-0.12227	-0.15678
	-74.5	-12.675	-12.0036					-74.5	-12.675	-12.0036					-74.5	-0.12062	-0.15971
	-74.4	-12.1053	-13.1226					-74.4	-12.1053	-13.1226					-74.4	-0.1228	-0.15325
	-74.3	-12.8174	-12.9191					-74.3	-12.8174	-12.9191					-74.3	-0.11969	-0.15196
	-74.2	-13.2039	-11.6781					-74.2	-13.2039	-11.6781					-74.2	-0.12086	-0.15134
	-74.1	-12.207	-12.0646					-74.1	-12.207	-12.0646					-74.1	-0.12257	-0.15211
	-74	-12.207	-11.9019					-74	-12.207	-11.9019					-74	-0.12347	-0.15342
	-73.9	-12.5936	-12.8174					-73.9	-12.5936	-12.8174					-73.9	-0.12273	-0.15035
	-73.8	-12.797	-11.617					-73.8	-12.797	-11.617					-73.8	-0.1214	-0.15033
	-73.7	-12.0443	-12.3494					-73.7	-12.0443	-12.3494					-73.7	-0.12173	-0.15264
	-73.6	-12.797	-12.4308					-73.6	-12.797	-12.4308					-73.6	-0.1224	-0.15408
	-73.5	-12.8784	-12.7157					-73.5	-12.8784	-12.7157					-73.5	-0.12107	-0.15091
	-73.4	-10.7829	-11.4136					-73.4	-10.7829	-11.4136					-73.4	-0.12288	-0.15386
	-73.3	-12.2681	-13.3667					-73.3	-12.2681	-13.3667					-73.3	-0.12314	-0.1559
	-73.2	-11.8612	-13.5295					-73.2	-11.8612	-13.5295					-73.2	-0.12198	-0.14922
	-73.1	-12.1053	-13.1632					-73.1	-12.1053	-13.1632					-73.1	-0.11908	-0.15122
	-73	-11.9019	-12.146					-73	-11.9019	-12.146					-73	-0.11964	-0.14751
	-72.9	-12.1867	-12.4512					-72.9	-12.1867	-12.4512					-72.9	-0.12132	-0.15314
	-72.8	-13.4277	-11.9425					-72.8	-13.4277	-11.9425					-72.8	-0.1231	-0.14423
	-72.7	-11.9425	-11.3729					-72.7	-11.9425	-11.3729					-72.7	-0.12389	-0.14701
	-72.6	-12.4308	-11.5153					-72.6	-12.4308	-11.5153					-72.6	-0.12052	-0.14476
	-72.5	-12.3698	-11.0881					-72.5	-12.3698	-11.0881					-72.5	-0.12374	-0.15155
	-72.4	-12.0036	-12.2477					-72.4	-12.0036	-12.2477					-72.4	-0.11813	-0.15382
	-72.3	-12.5122	-11.3729					-72.3	-12.5122	-11.3729					-72.3	-0.11978	-0.15308
	-72.2	-11.9222	-11.8205					-72.2	-11.9222	-11.8205					-72.2	-0.12126	-0.14998
	-72.1	-12.3901	-12.3494					-72.1	-12.3901	-12.3494					-72.1	-0.11765	-0.14953
	-72	-12.0443	-11.8612					-72	-12.0443	-11.8612					-72	-0.11904	-0.14717
	-71.9	-12.7767	-10.9253					-71.9	-12.7767	-10.9253					-71.9	-0.11914	-0.14867
	-71.8	-11.495	-12.5326					-71.8	-11.495	-12.5326					-71.8	-0.11906	-0.1508
	-71.7	-12.675	-10.6201					-71.7	-12.675	-10.6201					-71.7	-0.12009	-0.14578
	-71.6	-12.3291	-12.2681					-71.6	-12.3291	-12.2681					-71.6	-0.11937	-0.14587
	-71.5	-10.5387	-10.3963					-71.5	-10.5387	-10.3963					-71.5	-0.11872	-0.14574
	-71.4	-12.5326	-11.0677					-71.4	-12.5326	-11.0677					-71.4	-0.11807	-0.14618
	-71.3	-11.8408	-11.0677					-71.3	-11.8408	-11.0677					-71.3	-0.11857	-0.15029
	-71.2	-11.556	-10.7422					-71.2	-11.556	-10.7422					-71.2	-0.11795	-0.14726
	-71.1	-11.4136	-11.0067					-71.1	-11.4136	-11.0067					-71.1	-0.12073	-0.14918
	-71	-11.6984	-10.9456					-71	-11.6984	-10.9456					-71	-0.1239	-0.14643
	-70.9	-12.3494	-10.9049					-70.9	-12.3494	-10.9049					-70.9	-0.11915	-0.14699
	-70.8	-11.2305	-10.966					-70.8	-11.2305	-10.966					-70.8	-0.11977	-0.14689
	-70.7	-11.3729	-12.5936					-70.7	-11.3729	-12.5936					-70.7	-0.11952	-0.14955
	-70.6	-11.8408	-10.8643					-70.6	-11.8408	-10.8643					-70.6	-0.11817	-0.14635
	-70.5	-11.1898	-10.8439					-70.5	-11.1898	-10.8439					-70.5	-0.11799	-0.14642
	-70.4	-10.3353	-10.9863					-70.4	-10.3353	-10.9863					-70.4	-0.11851	-0.1504
	-70.3	-11.6577	-11.7594					-70.3	-11.6577	-11.7594					-70.3	-0.1205	-0.14639
	-70.2	-11.7594	-11.2712					-70.2	-11.7594	-11.2712					-70.2	-0.11784	-0.1488
	-70.1	-11.7391	-10.8643					-70.1	-11.7391	-10.8643					-70.1	-0.12031	-0.15222
	-70	-11.4543	-12.1256					-70	-11.4543	-12.1256					-70	-0.11782	-0.15085
	-69.9	-11.027	-11.7594					-69.9	-11.027	-11.7594					-69.9	-0.12039	-0.14783
	-69.8	-10.8643	-10.6812					-69.8	-10.8643	-10.6812					-69.8	-0.11898	-0.14603
	-69.7	-11.0881	-10.5794					-69.7	-11.0881	-10.5794					-69.7	-0.122	-0.1452
	-69.6	-11.8001	-11.3525					-69.6	-11.8001	-11.3525					-69.6	-0.11876	-0.14764
	-69.5	-11.4543	-10.4167					-69.5	-11.4543	-10.4167					-69.5	-0.11709	-0.14437
	-69.4	-11.3322	-11.3118					-69.4	-11.3322	-11.3118					-69.4	-0.11752	-0.14322
	-69.3	-10.9049	-9.80631					-69.3	-10.9049	-9.80631					-69.3	-0.11735	-0.14311
	-69.2	-11.1491	-11.1084					-69.2	-11.1491	-11.1084					-69.2	-0.11811	-0.14455
	-69.1	-12.0239	-10.0098					-69.1	-12.0239	-10.0098					-69.1	-0.11758	-0.14516
	-69	-11.1491	-11.0474					-69	-11.1491	-11.0474					-69	-0.11835	-0.14339
	-68.9	-11.8001	-10.1929					-68.9	-11.8001	-10.1929					-68.9	-0.11955	-0.14612
	-68.8	-10.6608	-11.1898					-68.8	-10.6608	-11.1898					-68.8	-0.11863	-0.14316
	-68.7	-11.4136	-10.1929					-68.7	-11.4136	-10.1929					-68.7	-0.11834	-0.14234
	-68.6	-11.0881	-11.1287					-68.6	-11.0881	-11.1287					-68.6	-0.12022	-0.1439
	-68.5	-10.6812	-10.7015					-68.5	-10.6812	-10.7015					-68.5	-0.11423	-0.1425
	-68.4	-11.3525	-10.1115					-68.4	-11.3525	-10.1115					-68.4	-0.1172	-0.14349
	-68.3	-11.5153	-10.7015					-68.3	-11.5153	-10.7015					-68.3	-0.11555	-0.14078
	-68.2	-10.376	-9.92838					-68.2	-10.376	-9.92838					-68.2	-0.11455	-0.14537
	-68.1	-11.6984	-9.72493					-68.1	-11.6984	-9.72493					-68.1	-0.11735	-0.14486
	-68	-11.3729	-10.2336					-68	-11.3729	-10.2336					-68	-0.11706	-0.1437
	-67.9	-10.8439	-10.3963					-67.9	-10.8439	-10.3963					-67.9	-0.11655	-0.14489
	-67.8	-11.6781	-10.6201					-67.8	-11.6781	-10.6201					-67.8	-0.11845	-0.14147
	-67.7	-11.2508	-11.1491					-67.7	-11.2508	-11.1491					-67.7	-0.11542	-0.146
	-67.6	-11.1287	-10.3963					-67.6	-11.1287	-10.3963					-67.6	-0.11544	-0.13958
	-67.5	-10.8032	-10.6608					-67.5	-10.8032	-10.6608					-67.5	-0.11701	-0.14462
	-67.4	-10.4777	-10.8643					-67.4	-10.4777	-10.8643					-67.4	-0.11477	-0.14533
	-67.3	-10.3353	-10.1318					-67.3	-10.3353	-10.1318					-67.3	-0.11584	-0.13552
	-67.2	-11.3525	-10.0708					-67.2	-11.3525	-10.0708					-67.2	-0.1141	-0.13846
	-67.1	-11.1287	-10.7015					-67.1	-11.1287	-10.7015					-67.1	-0.11385	-0.13576
	-67	-10.2743	-9.60286					-67	-10.2743	-9.60286					-67	-0.11258	-0.14058
	-66.9	-10.9863	-10.9863					-66.9	-10.9863	-10.9863					-66.9	-0.11143	-0.13653
	-66.8	-10.7218	-10.7218					-66.8	-10.7218	-10.7218					-66.8	-0.11505	-0.13981
	-66.7	-10.7015	-9.76562					-66.7	-10.7015	-9.76562					-66.7	-0.11348	-0.13816
	-66.6	-10.5184	-11.1287					-66.6	-10.5184	-11.1287					-66.6	-0.11405	-0.13814
	-66.5	-10.8439	-11.2508					-66.5	-10.8439	-11.2508					-66.5	-0.11294	-0.13456
	-66.4	-10.8236	-10.8032					-66.4	-10.8236	-10.8032					-66.4	-0.11153	-0.1302
	-66.3	-9.847	-10.6405					-66.3	-9.847	-10.6405					-66.3	-0.11083	-0.13571
	-66.2	-10.0708	-10.5184					-66.2	-10.0708	-10.5184					-66.2	-0.11342	-0.1304
	-66.1	-10.2743	-10.3353					-66.1	-10.2743	-10.3353					-66.1	-0.11478	-0.13446
	-66	-10.7218	-10.7625					-66	-10.7218	-10.7625					-66	-0.11484	-0.13698
	-65.9	-9.82666	-9.6639					-65.9	-9.82666	-9.6639					-65.9	-0.11159	-0.1377
	-65.8	-9.72493	-10.437					-65.8	-9.72493	-10.437					-65.8	-0.11225	-0.13594
	-65.7	-10.4777	-10.2539					-65.7	-10.4777	-10.2539					-65.7	-0.11466	-0.13288
	-65.6	-9.64355	-10.0098					-65.6	-9.64355	-10.0098					-65.6	-0.11645	-0.13548
	-65.5	-10.4167	-9.92838					-65.5	-10.4167	-9.92838					-65.5	-0.11547	-0.13087
	-65.4	-10.966	-10.5794					-65.4	-10.966	-10.5794					-65.4	-0.11599	-0.13299
	-65.3	-10.5387	-10.5998					-65.3	-10.5387	-10.5998					-65.3	-0.11667	-0.13057
	-65.2	-10.498	-7.77181					-65.2	-10.498	-7.77181					-65.2	-0.11489	-0.13302
	-65.1	-9.41976	-9.13493					-65.1	-9.41976	-9.13493					-65.1	-0.11421	-0.1308
	-65	-11.1694	-10.2743					-65	-11.1694	-10.2743					-65	-0.11468	-0.13141
	-64.9	-9.6639	-9.19596					-64.9	-9.6639	-9.19596					-64.9	-0.11223	-0.13066
	-64.8	-9.58252	-8.07699					-64.8	-9.58252	-8.07699					-64.8	-0.11356	-0.13468
	-64.7	-9.68424	-9.15527					-64.7	-9.68424	-9.15527					-64.7	-0.11421	-0.13408
	-64.6	-10.1725	-9.88769					-64.6	-10.1725	-9.88769					-64.6	-0.11495	-0.13271
	-64.5	-9.70459	-9.13493					-64.5	-9.70459	-9.13493					-64.5	-0.11243	-0.13192
	-64.4	-9.6639	-9.74528					-64.4	-9.6639	-9.74528					-64.4	-0.11213	-0.13489
	-64.3	-9.46045	-9.72493					-64.3	-9.46045	-9.72493					-64.3	-0.11528	-0.13479
	-64.2	-10.2336	-9.98942					-64.2	-10.2336	-9.98942					-64.2	-0.11082	-0.13457
	-64.1	-9.56217	-9.05355					-64.1	-9.56217	-9.05355					-64.1	-0.11266	-0.13145
	-64	-9.37907	-9.41976					-64	-9.37907	-9.41976					-64	-0.11463	-0.13038
	-63.9	-9.52148	-10.5591					-63.9	-9.52148	-10.5591					-63.9	-0.1118	-0.13344
	-63.8	-9.07389	-9.01286					-63.8	-9.07389	-9.01286					-63.8	-0.11037	-0.12832
	-63.7	-9.72493	-9.48079					-63.7	-9.72493	-9.48079					-63.7	-0.11266	-0.12792
	-63.6	-10.0708	-9.70459					-63.6	-10.0708	-9.70459					-63.6	-0.1115	-0.12863
	-63.5	-10.3556	-10.1318					-63.5	-10.3556	-10.1318					-63.5	-0.1118	-0.13138
	-63.4	-9.27734	-9.76562					-63.4	-9.27734	-9.76562					-63.4	-0.11406	-0.1305
	-63.3	-9.80631	-11.1084					-63.3	-9.80631	-11.1084					-63.3	-0.11089	-0.13395
	-63.2	-9.82666	-9.50114					-63.2	-9.82666	-9.50114					-63.2	-0.10996	-0.1258
	-63.1	-9.58252	-9.80631					-63.1	-9.58252	-9.80631					-63.1	-0.10961	-0.12622
	-63	-10.2743	-9.27734					-63	-10.2743	-9.27734					-63	-0.11229	-0.12651
	-62.9	-9.0332	-9.70459					-62.9	-9.0332	-9.70459					-62.9	-0.11096	-0.12858
	-62.8	-9.23665	-9.92838					-62.8	-9.23665	-9.92838					-62.8	-0.10859	-0.12563
	-62.7	-9.09424	-9.13493					-62.7	-9.09424	-9.13493					-62.7	-0.10965	-0.13291
	-62.6	-9.54183	-9.23665					-62.6	-9.54183	-9.23665					-62.6	-0.1115	-0.12567
	-62.5	-8.91113	-8.54492					-62.5	-8.91113	-8.54492					-62.5	-0.11259	-0.13058
	-62.4	-9.56217	-8.97217					-62.4	-9.56217	-8.97217					-62.4	-0.11302	-0.13202
	-62.3	-8.70768	-8.30078					-62.3	-8.70768	-8.30078					-62.3	-0.10903	-0.13658
	-62.2	-10.2132	-9.15527					-62.2	-10.2132	-9.15527					-62.2	-0.1095	-0.1308
	-62.1	-10.0505	-9.70459					-62.1	-10.0505	-9.70459					-62.1	-0.10941	-0.12752
	-62	-9.33838	-10.1725					-62	-9.33838	-10.1725					-62	-0.10926	-0.13162
	-61.9	-10.1318	-8.28044					-61.9	-10.1318	-8.28044					-61.9	-0.10981	-0.1304
	-61.8	-9.46045	-8.82975					-61.8	-9.46045	-8.82975					-61.8	-0.11012	-0.12802
	-61.7	-9.96907	-9.31803					-61.7	-9.96907	-9.31803					-61.7	-0.11091	-0.12745
	-61.6	-9.21631	-7.1818					-61.6	-9.21631	-7.1818					-61.6	-0.11045	-0.12921
	-61.5	-9.33838	-8.54492					-61.5	-9.33838	-8.54492					-61.5	-0.10782	-0.12943
	-61.4	-8.72803	-8.15836					-61.4	-8.72803	-8.15836					-61.4	-0.10901	-0.12915
	-61.3	-9.70459	-9.39941					-61.3	-9.70459	-9.39941					-61.3	-0.10821	-0.12765
	-61.2	-8.38216	-8.64665					-61.2	-8.38216	-8.64665					-61.2	-0.10726	-0.12591
	-61.1	-8.32113	-9.11458					-61.1	-8.32113	-9.11458					-61.1	-0.10967	-0.13176
	-61	-9.4401	-8.40251					-61	-9.4401	-8.40251					-61	-0.10857	-0.12525
	-60.9	-8.11767	-8.74837					-60.9	-8.11767	-8.74837					-60.9	-0.10855	-0.13218
	-60.8	-9.01286	-9.09424					-60.8	-9.01286	-9.09424					-60.8	-0.10814	-0.12468
	-60.7	-8.30078	-9.19596					-60.7	-8.30078	-9.19596					-60.7	-0.10872	-0.12659
	-60.6	-8.70768	-9.13493					-60.6	-8.70768	-9.13493					-60.6	-0.1077	-0.12319
	-60.5	-9.19596	-9.4401					-60.5	-9.19596	-9.4401					-60.5	-0.10721	-0.12441
	-60.4	-7.08008	-7.89388					-60.4	-7.08008	-7.89388					-60.4	-0.10584	-0.12345
	-60.3	-8.91113	-10.1522					-60.3	-8.91113	-10.1522					-60.3	-0.10651	-0.12546
	-60.2	-8.80941	-9.39941					-60.2	-8.80941	-9.39941					-60.2	-0.10887	-0.12573
	-60.1	-9.11458	-9.09424					-60.1	-9.11458	-9.09424					-60.1	-0.10789	-0.12412
	-60	-8.19906	-8.40251					-60	-8.19906	-8.40251					-60	-0.10913	-0.1239
	-59.9	-8.01595	-9.80631					-59.9	-8.01595	-9.80631					-59.9	-0.10897	-0.12048
	-59.8	-8.89079	-9.01286					-59.8	-8.89079	-9.01286					-59.8	-0.11018	-0.12199
	-59.7	-8.15837	-10.2539					-59.7	-8.15837	-10.2539					-59.7	-0.10742	-0.12705
	-59.6	-8.74837	-9.48079					-59.6	-8.74837	-9.48079					-59.6	-0.10902	-0.12035
	-59.5	-8.17871	-8.34147					-59.5	-8.17871	-8.34147					-59.5	-0.10639	-0.12058
	-59.4	-8.36182	-8.42285					-59.4	-8.36182	-8.42285					-59.4	-0.10562	-0.11922
	-59.3	-8.66699	-8.58561					-59.3	-8.66699	-8.58561					-59.3	-0.10826	-0.12547
	-59.2	-8.23975	-8.32113					-59.2	-8.23975	-8.32113					-59.2	-0.10715	-0.12193
	-59.1	-8.74837	-8.11767					-59.1	-8.74837	-8.11767					-59.1	-0.10727	-0.12109
	-59	-9.05355	-8.09733					-59	-9.05355	-8.09733					-59	-0.1061	-0.12234
	-58.9	-8.05664	-8.89079					-58.9	-8.05664	-8.89079					-58.9	-0.10917	-0.12484
	-58.8	-8.40251	-8.36182					-58.8	-8.40251	-8.36182					-58.8	-0.10578	-0.12063
	-58.7	-8.74837	-9.17562					-58.7	-8.74837	-9.17562					-58.7	-0.10552	-0.12042
	-58.6	-8.13802	-7.46663					-58.6	-8.13802	-7.46663					-58.6	-0.10681	-0.1193
	-58.5	-8.93148	-7.52767					-58.5	-8.93148	-7.52767					-58.5	-0.1048	-0.12076
	-58.4	-8.82975	-8.50423					-58.4	-8.82975	-8.50423					-58.4	-0.10615	-0.11937
	-58.3	-8.93148	-8.23975					-58.3	-8.93148	-8.23975					-58.3	-0.1029	-0.12059
	-58.2	-8.36182	-8.23975					-58.2	-8.36182	-8.23975					-58.2	-0.10388	-0.11839
	-58.1	-8.2194	-7.16146					-58.1	-8.2194	-7.16146					-58.1	-0.1065	-0.12335
	-58	-8.6263	-7.50732					-58	-8.6263	-7.50732					-58	-0.10417	-0.11696
	-57.9	-7.77181	-6.97835					-57.9	-7.77181	-6.97835					-57.9	-0.10596	-0.1167
	-57.8	-7.28353	-7.71077					-57.8	-7.28353	-7.71077					-57.8	-0.10201	-0.11835
	-57.7	-7.71077	-8.09733					-57.7	-7.71077	-8.09733					-57.7	-0.10239	-0.1127
	-57.6	-8.38216	-8.30078					-57.6	-8.38216	-8.30078					-57.6	-0.10414	-0.11795
	-57.5	-7.62939	-8.03629					-57.5	-7.62939	-8.03629					-57.5	-0.10332	-0.11771
	-57.4	-8.52458	-8.23975					-57.4	-8.52458	-8.23975					-57.4	-0.10277	-0.12016
	-57.3	-7.93457	-7.97526					-57.3	-7.93457	-7.97526					-57.3	-0.10387	-0.11544
	-57.2	-7.87353	-8.74837					-57.2	-7.87353	-8.74837					-57.2	-0.10124	-0.11413
	-57.1	-7.42594	-8.48389					-57.1	-7.42594	-8.48389					-57.1	-0.10121	-0.11623
	-57	-7.67008	-7.4056					-57	-7.67008	-7.4056					-57	-0.10462	-0.11527
	-56.9	-8.78906	-8.66699					-56.9	-8.78906	-8.66699					-56.9	-0.10462	-0.11596
	-56.8	-7.26318	-8.01595					-56.8	-7.26318	-8.01595					-56.8	-0.10409	-0.11843
	-56.7	-6.83594	-8.93148					-56.7	-6.83594	-8.93148					-56.7	-0.10459	-0.11608
	-56.6	-7.38525	-8.30078					-56.6	-7.38525	-8.30078					-56.6	-0.10604	-0.11032
	-56.5	-8.78906	-8.17871					-56.5	-8.78906	-8.17871					-56.5	-0.10079	-0.11272
	-56.4	-7.50732	-7.83284					-56.4	-7.50732	-7.83284					-56.4	-0.10426	-0.11397
	-56.3	-7.73112	-7.64974					-56.3	-7.73112	-7.64974					-56.3	-0.10369	-0.11406
	-56.2	-6.63249	-9.0332					-56.2	-6.63249	-9.0332					-56.2	-0.10096	-0.11004
	-56.1	-6.83594	-7.01904					-56.1	-6.83594	-7.01904					-56.1	-0.10139	-0.1121
	-56	-7.73112	-7.1818					-56	-7.73112	-7.1818					-56	-0.10102	-0.11136
	-55.9	-7.8125	-8.15837					-55.9	-7.8125	-8.15837					-55.9	-0.10176	-0.11224
	-55.8	-8.64665	-7.77181					-55.8	-8.64665	-7.77181					-55.8	-0.10254	-0.11333
	-55.7	-7.77181	-7.8125					-55.7	-7.77181	-7.8125					-55.7	-0.10024	-0.11897
	-55.6	-7.08008	-8.66699					-55.6	-7.08008	-8.66699					-55.6	-0.10192	-0.11557
	-55.5	-7.20215	-7.1818					-55.5	-7.20215	-7.1818					-55.5	-0.10132	-0.11269
	-55.4	-7.75146	-8.70768					-55.4	-7.75146	-8.70768					-55.4	-0.10106	-0.11451
	-55.3	-7.69043	-7.83284					-55.3	-7.69043	-7.83284					-55.3	-0.10184	-0.10975
	-55.2	-7.34456	-7.83284					-55.2	-7.34456	-7.83284					-55.2	-0.10034	-0.11033
	-55.1	-7.62939	-7.60905					-55.1	-7.62939	-7.60905					-55.1	-0.10047	-0.10942
	-55	-7.87353	-6.91732					-55	-7.87353	-6.91732					-55	-0.10012	-0.10658
	-54.9	-6.32731	-6.89697					-54.9	-6.32731	-6.89697					-54.9	-0.09945	-0.1125
	-54.8	-8.50423	-6.67318					-54.8	-8.50423	-6.67318					-54.8	-0.09964	-0.1114
	-54.7	-7.24284	-7.03939					-54.7	-7.24284	-7.03939					-54.7	-0.0996	-0.11019
	-54.6	-7.46663	-7.5887					-54.6	-7.46663	-7.5887					-54.6	-0.10007	-0.11014
	-54.5	-7.34456	-7.20215					-54.5	-7.34456	-7.20215					-54.5	-0.09992	-0.11152
	-54.4	-7.5887	-7.75146					-54.4	-7.5887	-7.75146					-54.4	-0.09804	-0.11198
	-54.3	-6.83594	-7.56836					-54.3	-6.83594	-7.56836					-54.3	-0.10035	-0.11428
	-54.2	-7.24284	-7.26318					-54.2	-7.24284	-7.26318					-54.2	-0.09954	-0.1076
	-54.1	-7.67008	-8.46354					-54.1	-7.67008	-8.46354					-54.1	-0.09969	-0.11016
	-54	-6.75456	-7.32422					-54	-6.75456	-7.32422					-54	-0.10034	-0.10953
	-53.9	-6.7749	-7.62939					-53.9	-6.7749	-7.62939					-53.9	-0.09701	-0.11055
	-53.8	-6.14421	-7.05973					-53.8	-6.14421	-7.05973					-53.8	-0.09882	-0.10649
	-53.7	-5.85937	-7.44629					-53.7	-5.85937	-7.44629					-53.7	-0.09835	-0.10812
	-53.6	-6.67318	-7.69043					-53.6	-6.67318	-7.69043					-53.6	-0.09723	-0.10783
	-53.5	-6.81559	-7.75146					-53.5	-6.81559	-7.75146					-53.5	-0.09502	-0.11048
	-53.4	-6.83594	-7.4056					-53.4	-6.83594	-7.4056					-53.4	-0.09635	-0.10972
	-53.3	-6.95801	-6.91732					-53.3	-6.95801	-6.91732					-53.3	-0.09681	-0.11038
	-53.2	-6.61214	-8.48389					-53.2	-6.61214	-8.48389					-53.2	-0.09496	-0.10778
	-53.1	-6.85628	-7.77181					-53.1	-6.85628	-7.77181					-53.1	-0.09644	-0.10465
	-53	-6.71387	-8.23975					-53	-6.71387	-8.23975					-53	-0.09636	-0.10451
	-52.9	-6.16455	-7.24284					-52.9	-6.16455	-7.24284					-52.9	-0.09913	-0.10902
	-52.8	-6.65283	-7.10042					-52.8	-6.65283	-7.10042					-52.8	-0.09856	-0.10479
	-52.7	-6.22559	-6.7749					-52.7	-6.22559	-6.7749					-52.7	-0.09526	-0.10897
	-52.6	-7.14111	-6.91732					-52.6	-7.14111	-6.91732					-52.6	-0.09687	-0.10858
	-52.5	-6.28662	-6.49007					-52.5	-6.28662	-6.49007					-52.5	-0.09669	-0.10809
	-52.4	-7.12077	-7.30387					-52.4	-7.12077	-7.30387					-52.4	-0.09465	-0.1079
	-52.3	-6.5918	-6.95801					-52.3	-6.5918	-6.95801					-52.3	-0.09734	-0.10602
	-52.2	-7.4056	-7.03939					-52.2	-7.4056	-7.03939					-52.2	-0.09486	-0.10682
	-52.1	-6.63249	-7.64974					-52.1	-6.63249	-7.64974					-52.1	-0.09887	-0.10389
	-52	-5.59489	-6.93766					-52	-5.59489	-6.93766					-52	-0.09299	-0.10255
	-51.9	-5.51351	-6.55111					-51.9	-5.51351	-6.55111					-51.9	-0.09586	-0.10637
	-51.8	-7.28353	-6.30697					-51.8	-7.28353	-6.30697					-51.8	-0.09287	-0.10114
	-51.7	-6.5918	-6.57145					-51.7	-6.5918	-6.57145					-51.7	-0.09607	-0.10271
	-51.6	-6.81559	-6.16455					-51.6	-6.81559	-6.16455					-51.6	-0.09517	-0.10546
	-51.5	-6.26628	-6.97835					-51.5	-6.26628	-6.97835					-51.5	-0.09513	-0.10552
	-51.4	-7.44629	-6.1849					-51.4	-7.44629	-6.1849					-51.4	-0.09528	-0.1019
	-51.3	-6.46973	-5.65592					-51.3	-6.46973	-5.65592					-51.3	-0.0966	-0.10268
	-51.2	-6.81559	-6.89697					-51.2	-6.81559	-6.89697					-51.2	-0.09549	-0.10037
	-51.1	-5.67627	-7.1818					-51.1	-5.67627	-7.1818					-51.1	-0.09643	-0.10163
	-51	-6.10352	-6.42904					-51	-6.10352	-6.42904					-51	-0.09416	-0.10041
	-50.9	-5.98144	-6.85628					-50.9	-5.98144	-6.85628					-50.9	-0.09362	-0.10434
	-50.8	-5.94075	-6.06282					-50.8	-5.94075	-6.06282					-50.8	-0.09464	-0.09781
	-50.7	-5.63558	-7.32422					-50.7	-5.63558	-7.32422					-50.7	-0.09244	-0.10241
	-50.6	-5.9611	-6.08317					-50.6	-5.9611	-6.08317					-50.6	-0.09267	-0.0977
	-50.5	-5.98144	-5.5542					-50.5	-5.98144	-5.5542					-50.5	-0.09213	-0.09797
	-50.4	-6.12386	-5.69661					-50.4	-6.12386	-5.69661					-50.4	-0.09134	-0.10134
	-50.3	-6.53076	-6.81559					-50.3	-6.53076	-6.81559					-50.3	-0.0912	-0.09813
	-50.2	-5.26937	-7.20215					-50.2	-5.26937	-7.20215					-50.2	-0.09239	-0.09618
	-50.1	-6.61214	-6.79525					-50.1	-6.61214	-6.79525					-50.1	-0.09137	-0.10007
	-50	-5.26937	-5.10661					-50	-5.26937	-5.10661					-50	-0.09135	-0.097
	-49.9	-6.30697	-6.44938					-49.9	-6.30697	-6.44938					-49.9	-0.09164	-0.10082
	-49.8	-5.81868	-6.00179					-49.8	-5.81868	-6.00179					-49.8	-0.09262	-0.0984
	-49.7	-6.00179	-7.36491					-49.7	-6.00179	-7.36491					-49.7	-0.0945	-0.09798
	-49.6	-5.69661	-6.75456					-49.6	-5.69661	-6.75456					-49.6	-0.09149	-0.09796
	-49.5	-5.59489	-6.32731					-49.5	-5.59489	-6.32731					-49.5	-0.09029	-0.09348
	-49.4	-6.87663	-6.73421					-49.4	-6.87663	-6.73421					-49.4	-0.09188	-0.09139
	-49.3	-6.14421	-6.26628					-49.3	-6.14421	-6.26628					-49.3	-0.09148	-0.0951
	-49.2	-5.49316	-6.44938					-49.2	-5.49316	-6.44938					-49.2	-0.0914	-0.09573
	-49.1	-6.24593	-6.83594					-49.1	-6.24593	-6.83594					-49.1	-0.09205	-0.09768
	-49	-5.53385	-5.98144					-49	-5.53385	-5.98144					-49	-0.09183	-0.0996
	-48.9	-5.7373	-6.26628					-48.9	-5.7373	-6.26628					-48.9	-0.0904	-0.09608
	-48.8	-5.45247	-6.79525					-48.8	-5.45247	-6.79525					-48.8	-0.09224	-0.10078
	-48.7	-5.94075	-6.97835					-48.7	-5.94075	-6.97835					-48.7	-0.0926	-0.09636
	-48.6	-4.59798	-5.59489					-48.6	-4.59798	-5.59489					-48.6	-0.08948	-0.09642
	-48.5	-5.81868	-5.18799					-48.5	-5.81868	-5.18799					-48.5	-0.09152	-0.09428
	-48.4	-5.20833	-6.93766					-48.4	-5.20833	-6.93766					-48.4	-0.09134	-0.09664
	-48.3	-6.83594	-5.18799					-48.3	-6.83594	-5.18799					-48.3	-0.09029	-0.09542
	-48.2	-4.82178	-5.81868					-48.2	-4.82178	-5.81868					-48.2	-0.08743	-0.09571
	-48.1	-6.02213	-5.16764					-48.1	-6.02213	-5.16764					-48.1	-0.08842	-0.09461
	-48	-4.88281	-5.45247					-48	-4.88281	-5.45247					-48	-0.08804	-0.09544
	-47.9	-6.83594	-4.86247					-47.9	-6.83594	-4.86247					-47.9	-0.0893	-0.09432
	-47.8	-5.43213	-6.04248					-47.8	-5.43213	-6.04248					-47.8	-0.08768	-0.09017
	-47.7	-4.53695	-5.24902					-47.7	-4.53695	-5.24902					-47.7	-0.08838	-0.09593
	-47.6	-5.10661	-6.12386					-47.6	-5.10661	-6.12386					-47.6	-0.08756	-0.09028
	-47.5	-4.41488	-5.87972					-47.5	-4.41488	-5.87972					-47.5	-0.08774	-0.09202
	-47.4	-4.82178	-6.46973					-47.4	-4.82178	-6.46973					-47.4	-0.08773	-0.09274
	-47.3	-5.5542	-5.61523					-47.3	-5.5542	-5.61523					-47.3	-0.08716	-0.09082
	-47.2	-4.94385	-5.18799					-47.2	-4.94385	-5.18799					-47.2	-0.08741	-0.0911
	-47.1	-4.49626	-6.22559					-47.1	-4.49626	-6.22559					-47.1	-0.08735	-0.09368
	-47	-5.35075	-4.1097					-47	-5.35075	-4.1097					-47	-0.08742	-0.08929
	-46.9	-5.22868	-6.26628					-46.9	-5.22868	-6.26628					-46.9	-0.08595	-0.09053
	-46.8	-5.1473	-6.04248					-46.8	-5.1473	-6.04248					-46.8	-0.08449	-0.08917
	-46.7	-4.86247	-6.49007					-46.7	-4.86247	-6.49007					-46.7	-0.08594	-0.0929
	-46.6	-3.8859	-5.75765					-46.6	-3.8859	-5.75765					-46.6	-0.0859	-0.08901
	-46.5	-4.90316	-5.26937					-46.5	-4.90316	-5.26937					-46.5	-0.08605	-0.09072
	-46.4	-5.00488	-6.30697					-46.4	-5.00488	-6.30697					-46.4	-0.08368	-0.08771
	-46.3	-4.08935	-5.75765					-46.3	-4.08935	-5.75765					-46.3	-0.08531	-0.08652
	-46.2	-6.06282	-5.22868					-46.2	-6.06282	-5.22868					-46.2	-0.08405	-0.08741
	-46.1	-5.28971	-4.78109					-46.1	-5.28971	-4.78109					-46.1	-0.08438	-0.086
	-46	-4.96419	-5.28971					-46	-4.96419	-5.28971					-46	-0.08253	-0.08463
	-45.9	-3.74349	-4.82178					-45.9	-3.74349	-4.82178					-45.9	-0.08015	-0.08584
	-45.8	-4.39453	-4.69971					-45.8	-4.39453	-4.69971					-45.8	-0.08224	-0.08585
	-45.7	-5.22868	-5.26937					-45.7	-5.22868	-5.26937					-45.7	-0.08212	-0.08725
	-45.6	-4.5166	-5.41178					-45.6	-4.5166	-5.41178					-45.6	-0.08317	-0.08845
	-45.5	-5.49316	-4.80143					-45.5	-5.49316	-4.80143					-45.5	-0.08197	-0.08521
	-45.4	-4.43522	-5.69661					-45.4	-4.43522	-5.69661					-45.4	-0.08275	-0.08321
	-45.3	-4.49626	-4.04867					-45.3	-4.49626	-4.04867					-45.3	-0.08227	-0.08664
	-45.2	-3.90625	-3.68245					-45.2	-3.90625	-3.68245					-45.2	-0.08208	-0.08383
	-45.1	-5.04557	-5.16764					-45.1	-5.04557	-5.16764					-45.1	-0.08335	-0.08094
	-45	-4.41488	-4.08935					-45	-4.41488	-4.08935					-45	-0.08137	-0.08218
	-44.9	-4.31315	-4.23177					-44.9	-4.31315	-4.23177					-44.9	-0.08389	-0.08902
	-44.8	-4.82178	-3.23486					-44.8	-4.82178	-3.23486					-44.8	-0.08087	-0.08288
	-44.7	-4.15039	-5.61523					-44.7	-4.15039	-5.61523					-44.7	-0.08304	-0.08688
	-44.6	-4.94385	-3.78418					-44.6	-4.94385	-3.78418					-44.6	-0.08093	-0.08719
	-44.5	-4.80143	-4.65902					-44.5	-4.80143	-4.65902					-44.5	-0.08156	-0.08437
	-44.4	-3.66211	-3.64176					-44.4	-3.66211	-3.64176					-44.4	-0.08187	-0.08388
	-44.3	-3.82487	-6.368					-44.3	-3.82487	-6.368					-44.3	-0.08098	-0.08392
	-44.2	-4.08935	-5.31006					-44.2	-4.08935	-5.31006					-44.2	-0.07946	-0.08263
	-44.1	-3.80452	-4.88281					-44.1	-3.80452	-4.88281					-44.1	-0.07956	-0.08477
	-44	-4.47591	-3.98763					-44	-4.47591	-3.98763					-44	-0.07732	-0.08459
	-43.9	-4.1097	-4.15039					-43.9	-4.1097	-4.15039					-43.9	-0.07788	-0.08198
	-43.8	-4.29281	-5.20833					-43.8	-4.29281	-5.20833					-43.8	-0.08054	-0.07882
	-43.7	-4.1097	-5.49316					-43.7	-4.1097	-5.49316					-43.7	-0.0776	-0.08105
	-43.6	-4.25212	-4.17073					-43.6	-4.25212	-4.17073					-43.6	-0.07839	-0.07963
	-43.5	-4.25212	-4.21143					-43.5	-4.25212	-4.21143					-43.5	-0.07795	-0.08107
	-43.4	-3.7028	-3.90625					-43.4	-3.7028	-3.90625					-43.4	-0.07897	-0.0832
	-43.3	-4.5166	-5.04557					-43.3	-4.5166	-5.04557					-43.3	-0.07948	-0.08299
	-43.2	-4.39453	-5.22868					-43.2	-4.39453	-5.22868					-43.2	-0.07729	-0.08286
	-43.1	-2.889	-4.49626					-43.1	-2.889	-4.49626					-43.1	-0.07746	-0.07952
	-43	-4.13004	-5.24902					-43	-4.13004	-5.24902					-43	-0.07698	-0.08066
	-42.9	-4.72005	-4.17073					-42.9	-4.72005	-4.17073					-42.9	-0.07783	-0.07984
	-42.8	-4.63867	-4.80143					-42.8	-4.63867	-4.80143					-42.8	-0.07797	-0.07641
	-42.7	-4.29281	-4.47591					-42.7	-4.29281	-4.47591					-42.7	-0.07524	-0.07954
	-42.6	-4.55729	-4.08935					-42.6	-4.55729	-4.08935					-42.6	-0.07527	-0.07946
	-42.5	-3.479	-3.27555					-42.5	-3.479	-3.27555					-42.5	-0.07632	-0.08059
	-42.4	-3.62142	-4.31315					-42.4	-3.62142	-4.31315					-42.4	-0.07663	-0.07897
	-42.3	-3.15348	-3.72314					-42.3	-3.15348	-3.72314					-42.3	-0.07705	-0.07986
	-42.2	-4.41488	-4.65902					-42.2	-4.41488	-4.65902					-42.2	-0.07614	-0.08215
	-42.1	-3.35693	-4.31315					-42.1	-3.35693	-4.31315					-42.1	-0.0774	-0.07945
	-42	-4.17074	-4.5166					-42	-4.17074	-4.5166					-42	-0.0758	-0.08151
	-41.9	-3.98763	-3.64176					-41.9	-3.98763	-3.64176					-41.9	-0.07436	-0.07583
	-41.8	-3.43831	-3.51969					-41.8	-3.43831	-3.51969					-41.8	-0.07418	-0.07563
	-41.7	-3.94694	-3.43831					-41.7	-3.94694	-3.43831					-41.7	-0.07639	-0.0791
	-41.6	-3.35693	-3.60107					-41.6	-3.35693	-3.60107					-41.6	-0.07314	-0.07654
	-41.5	-3.62142	-3.11279					-41.5	-3.62142	-3.11279					-41.5	-0.07474	-0.07903
	-41.4	-3.0721	-3.96728					-41.4	-3.0721	-3.96728					-41.4	-0.07214	-0.07577
	-41.3	-3.43831	-3.94694					-41.3	-3.43831	-3.94694					-41.3	-0.07406	-0.07738
	-41.2	-3.0721	-3.80452					-41.2	-3.0721	-3.80452					-41.2	-0.07293	-0.07685
	-41.1	-3.64176	-3.54004					-41.1	-3.64176	-3.54004					-41.1	-0.07181	-0.07642
	-41	-2.74658	-4.02832					-41	-2.74658	-4.02832					-41	-0.07043	-0.07583
	-40.9	-2.76693	-3.05176					-40.9	-2.76693	-3.05176					-40.9	-0.07349	-0.07253
	-40.8	-2.58382	-4.3335					-40.8	-2.58382	-4.3335					-40.8	-0.07091	-0.07413
	-40.7	-2.2583	-2.82796					-40.7	-2.2583	-2.82796					-40.7	-0.06933	-0.07284
	-40.6	-3.09245	-3.7028					-40.6	-3.09245	-3.7028					-40.6	-0.07137	-0.0725
	-40.5	-2.78727	-3.49935					-40.5	-2.78727	-3.49935					-40.5	-0.07226	-0.06838
	-40.4	-2.46175	-3.41797					-40.4	-2.46175	-3.41797					-40.4	-0.07062	-0.07085
	-40.3	-3.09245	-2.889					-40.3	-3.09245	-2.889					-40.3	-0.07033	-0.07338
	-40.2	-2.60417	-3.8859					-40.2	-2.60417	-3.8859					-40.2	-0.07271	-0.07245
	-40.1	-3.2959	-4.35384					-40.1	-3.2959	-4.35384					-40.1	-0.07261	-0.0746
	-40	-3.45866	-3.80452					-40	-3.45866	-3.80452					-40	-0.06822	-0.07031
	-39.9	-1.79036	-4.37419					-39.9	-1.79036	-4.37419					-39.9	-0.07036	-0.07111
	-39.8	-2.74658	-3.98763					-39.8	-2.74658	-3.98763					-39.8	-0.07015	-0.07095
	-39.7	-2.97038	-3.66211					-39.7	-2.97038	-3.66211					-39.7	-0.07021	-0.07416
	-39.6	-2.74658	-4.78109					-39.6	-2.74658	-4.78109					-39.6	-0.06817	-0.07324
	-39.5	-2.95003	-3.25521					-39.5	-2.95003	-3.25521					-39.5	-0.06721	-0.07031
	-39.4	-2.80762	-3.35693					-39.4	-2.80762	-3.35693					-39.4	-0.06694	-0.06726
	-39.3	-2.889	-3.54004					-39.3	-2.889	-3.54004					-39.3	-0.06789	-0.06723
	-39.2	-2.46175	-3.17383					-39.2	-2.46175	-3.17383					-39.2	-0.06911	-0.06821
	-39.1	-2.97038	-3.01107					-39.1	-2.97038	-3.01107					-39.1	-0.06737	-0.07003
	-39	-3.25521	-2.889					-39	-3.25521	-2.889					-39	-0.06667	-0.06807
	-38.9	-2.09554	-3.58073					-38.9	-2.09554	-3.58073					-38.9	-0.06753	-0.06921
	-38.8	-2.13623	-3.54004					-38.8	-2.13623	-3.54004					-38.8	-0.06875	-0.06797
	-38.7	-3.01107	-3.479					-38.7	-3.01107	-3.479					-38.7	-0.06633	-0.06765
	-38.6	-2.84831	-2.21761					-38.6	-2.84831	-2.21761					-38.6	-0.06689	-0.06571
	-38.5	-3.82487	-3.51969					-38.5	-3.82487	-3.51969					-38.5	-0.06677	-0.06295
	-38.4	-1.70898	-2.889					-38.4	-1.70898	-2.889					-38.4	-0.06571	-0.06449
	-38.3	-2.90934	-3.64176					-38.3	-2.90934	-3.64176					-38.3	-0.06834	-0.06795
	-38.2	-2.19727	-2.0752					-38.2	-2.19727	-2.0752					-38.2	-0.06429	-0.06411
	-38.1	-2.19727	-2.17692					-38.1	-2.19727	-2.17692					-38.1	-0.0668	-0.06486
	-38	-1.64795	-2.44141					-38	-1.64795	-2.44141					-38	-0.06603	-0.06602
	-37.9	-2.13623	-3.31624					-37.9	-2.13623	-3.31624					-37.9	-0.06389	-0.06787
	-37.8	-1.87174	-2.62451					-37.8	-1.87174	-2.62451					-37.8	-0.06442	-0.06484
	-37.7	-2.84831	-3.23486					-37.7	-2.84831	-3.23486					-37.7	-0.06449	-0.06486
	-37.6	-2.86865	-3.19417					-37.6	-2.86865	-3.19417					-37.6	-0.0641	-0.06365
	-37.5	-1.01725	-3.25521					-37.5	-1.01725	-3.25521					-37.5	-0.06339	-0.06214
	-37.4	-1.8514	-2.54313					-37.4	-1.8514	-2.54313					-37.4	-0.06244	-0.06493
	-37.3	-1.54622	-3.54004					-37.3	-1.54622	-3.54004					-37.3	-0.06178	-0.06094
	-37.2	-2.13623	-2.05485					-37.2	-2.13623	-2.05485					-37.2	-0.0616	-0.06236
	-37.1	-1.28174	-2.84831					-37.1	-1.28174	-2.84831					-37.1	-0.06242	-0.05801
	-37	-1.77002	-2.38037					-37	-1.77002	-2.38037					-37	-0.06246	-0.0611
	-36.9	-1.89209	-3.0721					-36.9	-1.89209	-3.0721					-36.9	-0.05901	-0.06054
	-36.8	-1.68864	-2.58382					-36.8	-1.68864	-2.58382					-36.8	-0.06178	-0.06436
	-36.7	-1.48519	-3.05176					-36.7	-1.48519	-3.05176					-36.7	-0.05954	-0.05853
	-36.6	-1.15967	-3.51969					-36.6	-1.15967	-3.51969					-36.6	-0.05847	-0.06109
	-36.5	-2.23796	-3.54004					-36.5	-2.23796	-3.54004					-36.5	-0.06024	-0.06004
	-36.4	-0.87484	-3.25521					-36.4	-0.87484	-3.25521					-36.4	-0.05814	-0.05877
	-36.3	-1.8514	-2.86865					-36.3	-1.8514	-2.86865					-36.3	-0.06036	-0.06109
	-36.2	-1.56657	-2.13623					-36.2	-1.56657	-2.13623					-36.2	-0.0593	-0.05958
	-36.1	-1.95312	-2.62451					-36.1	-1.95312	-2.62451					-36.1	-0.05944	-0.05857
	-36	-2.31934	-2.01416					-36	-2.31934	-2.01416					-36	-0.05962	-0.05699
	-35.9	-1.50553	-2.27865					-35.9	-1.50553	-2.27865					-35.9	-0.05854	-0.05687
	-35.8	-1.34277	-2.44141					-35.8	-1.34277	-2.44141					-35.8	-0.05725	-0.05841
	-35.7	-2.70589	-2.74658					-35.7	-2.70589	-2.74658					-35.7	-0.05956	-0.05665
	-35.6	-0.89518	-2.50244					-35.6	-0.89518	-2.50244					-35.6	-0.06034	-0.06016
	-35.5	-1.89209	-2.13623					-35.5	-1.89209	-2.13623					-35.5	-0.06027	-0.05918
	-35.4	-2.27865	-3.54004					-35.4	-2.27865	-3.54004					-35.4	-0.05703	-0.05972
	-35.3	-1.72933	-2.82796					-35.3	-1.72933	-2.82796					-35.3	-0.05951	-0.05492
	-35.2	-1.79036	-2.17692					-35.2	-1.79036	-2.17692					-35.2	-0.05568	-0.05753
	-35.1	-1.40381	-2.72624					-35.1	-1.40381	-2.72624					-35.1	-0.05609	-0.05525
	-35	-1.99381	-2.27865					-35	-1.99381	-2.27865					-35	-0.05477	-0.05473
	-34.9	-1.89209	-1.09863					-34.9	-1.89209	-1.09863					-34.9	-0.05567	-0.05326
	-34.8	-1.26139	-1.93278					-34.8	-1.26139	-1.93278					-34.8	-0.05473	-0.05598
	-34.7	-0.85449	-2.38037					-34.7	-0.85449	-2.38037					-34.7	-0.05606	-0.05283
	-34.6	-1.2207	-2.52279					-34.6	-1.2207	-2.52279					-34.6	-0.05497	-0.05446
	-34.5	-1.32243	-1.6276					-34.5	-1.32243	-1.6276					-34.5	-0.05536	-0.05171
	-34.4	-1.79036	-2.15658					-34.4	-1.79036	-2.15658					-34.4	-0.05406	-0.05385
	-34.3	-0.93587	-1.50553					-34.3	-0.93587	-1.50553					-34.3	-0.05424	-0.05384
	-34.2	-0.52897	-3.05176					-34.2	-0.52897	-3.05176					-34.2	-0.05383	-0.05062
	-34.1	0.04069	-2.42106					-34.1	0.04069	-2.42106					-34.1	-0.0539	-0.05251
	-34	-0.97656	-2.64486					-34	-0.97656	-2.64486					-34	-0.05178	-0.05138
	-33.9	-0.93587	-1.48519					-33.9	-0.93587	-1.48519					-33.9	-0.05279	-0.05121
	-33.8	-1.09863	-1.4445					-33.8	-1.09863	-1.4445					-33.8	-0.05222	-0.04839
	-33.7	0.142415	-2.82796					-33.7	0.142415	-2.82796					-33.7	-0.04969	-0.05134
	-33.6	-1.48519	-1.68864					-33.6	-1.48519	-1.68864					-33.6	-0.04996	-0.05124
	-33.5	0.610352	-2.17692					-33.5	0.610352	-2.17692					-33.5	-0.05203	-0.05216
	-33.4	-0.46794	-2.05485					-33.4	-0.46794	-2.05485					-33.4	-0.05193	-0.05103
	-33.3	-0.04069	-1.68864					-33.3	-0.04069	-1.68864					-33.3	-0.05111	-0.05026
	-33.2	0.020345	-2.46175					-33.2	0.020345	-2.46175					-33.2	-0.05002	-0.05132
	-33.1	-1.13932	-2.2583					-33.1	-1.13932	-2.2583					-33.1	-0.05154	-0.0492
	-33	-1.13932	-1.99381					-33	-1.13932	-1.99381					-33	-0.04975	-0.05031
	-32.9	-1.13932	-2.72624					-32.9	-1.13932	-2.72624					-32.9	-0.05075	-0.047
	-32.8	-1.11898	-1.4445					-32.8	-1.11898	-1.4445					-32.8	-0.04965	-0.04604
	-32.7	-0.59001	-1.20036					-32.7	-0.59001	-1.20036					-32.7	-0.04686	-0.04611
	-32.6	-1.09863	-2.27865					-32.6	-1.09863	-2.27865					-32.6	-0.04922	-0.04486
	-32.5	-1.66829	-1.2207					-32.5	-1.66829	-1.2207					-32.5	-0.04953	-0.04946
	-32.4	-0.65104	-2.40072					-32.4	-0.65104	-2.40072					-32.4	-0.04851	-0.04748
	-32.3	-0.48828	-1.24105					-32.3	-0.48828	-1.24105					-32.3	-0.04716	-0.05077
	-32.2	-0.71208	-2.54313					-32.2	-0.71208	-2.54313					-32.2	-0.04789	-0.04615
	-32.1	-0.93587	-1.87174					-32.1	-0.93587	-1.87174					-32.1	-0.04713	-0.04617
	-32	7.45e-09	-0.95622					-32	7.45e-09	-0.95622					-32	-0.04618	-0.04735
	-31.9	-0.44759	-1.89209					-31.9	-0.44759	-1.89209					-31.9	-0.04795	-0.04855
	-31.8	0.223796	-3.09245					-31.8	0.223796	-3.09245					-31.8	-0.04645	-0.04521
	-31.7	0.04069	-0.99691					-31.7	0.04069	-0.99691					-31.7	-0.04674	-0.04335
	-31.6	-1.20036	-0.38656					-31.6	-1.20036	-0.38656					-31.6	-0.04522	-0.04413
	-31.5	-0.6307	-1.34277					-31.5	-0.6307	-1.34277					-31.5	-0.04536	-0.04481
	-31.4	0.284831	-1.09863					-31.4	0.284831	-1.09863					-31.4	-0.04594	-0.04273
	-31.3	0.101725	-0.69173					-31.3	0.101725	-0.69173					-31.3	-0.04561	-0.04275
	-31.2	-0.4069	-0.89518					-31.2	-0.4069	-0.89518					-31.2	-0.04414	-0.04458
	-31.1	-1.01725	-2.0752					-31.1	-1.01725	-2.0752					-31.1	-0.04674	-0.04462
	-31	-1.5e-08	-0.99691					-31	-1.5e-08	-0.99691					-31	-0.04306	-0.04213
	-30.9	-0.24414	-0.52897					-30.9	-0.24414	-0.52897					-30.9	-0.04285	-0.04466
	-30.8	-0.12207	-1.64795					-30.8	-0.12207	-1.64795					-30.8	-0.04116	-0.04033
	-30.7	-0.36621	-1.95312					-30.7	-0.36621	-1.95312					-30.7	-0.04184	-0.0403
	-30.6	1.13932	-0.67139					-30.6	1.13932	-0.67139					-30.6	-0.0421	-0.03999
	-30.5	1.46484	-0.83415					-30.5	1.46484	-0.83415					-30.5	-0.03989	-0.04097
	-30.4	0.020345	-0.8138					-30.4	0.020345	-0.8138					-30.4	-0.04138	-0.03842
	-30.3	0.549316	-1.42415					-30.3	0.549316	-1.42415					-30.3	-0.0398	-0.03999
	-30.2	-0.14242	-1.58691					-30.2	-0.14242	-1.58691					-30.2	-0.0431	-0.04094
	-30.1	0.569661	-1.18001					-30.1	0.569661	-1.18001					-30.1	-0.03989	-0.03951
	-30	0.406901	-1.60726					-30	0.406901	-1.60726					-30	-0.04133	-0.03809
	-29.9	0.244141	-1.38346					-29.9	0.244141	-1.38346					-29.9	-0.03867	-0.03921
	-29.8	-1.01725	-2.0752					-29.8	-1.01725	-2.0752					-29.8	-0.03934	-0.03875
	-29.7	-0.08138	-2.74658					-29.7	-0.08138	-2.74658					-29.7	-0.03839	-0.03944
	-29.6	0.264486	-0.54932					-29.6	0.264486	-0.54932					-29.6	-0.03812	-0.03744
	-29.5	-0.28483	-1.87174					-29.5	-0.28483	-1.87174					-29.5	-0.03717	-0.03295
	-29.4	0.203451	-0.52897					-29.4	0.203451	-0.52897					-29.4	-0.03747	-0.03297
	-29.3	1.64795	-0.30518					-29.3	1.64795	-0.30518					-29.3	-0.03597	-0.03573
	-29.2	0.915527	-0.95622					-29.2	0.915527	-0.95622					-29.2	-0.03779	-0.03586
	-29.1	-0.46794	-0.4069					-29.1	-0.46794	-0.4069					-29.1	-0.03722	-0.03588
	-29	0.12207	-1.15967					-29	0.12207	-1.15967					-29	-0.03616	-0.03868
	-28.9	0.16276	-1.05794					-28.9	0.16276	-1.05794					-28.9	-0.03466	-0.03564
	-28.8	-0.16276	-0.83415					-28.8	-0.16276	-0.83415					-28.8	-0.03815	-0.03463
	-28.7	-0.06104	-0.99691					-28.7	-0.06104	-0.99691					-28.7	-0.0366	-0.03449
	-28.6	0.325521	-0.73242					-28.6	0.325521	-0.73242					-28.6	-0.03572	-0.03362
	-28.5	1.34277	-0.14242					-28.5	1.34277	-0.14242					-28.5	-0.03523	-0.03427
	-28.4	-0.10173	0.04069					-28.4	-0.10173	0.04069					-28.4	-0.03388	-0.03302
	-28.3	0.956217	-1.11898					-28.3	0.956217	-1.11898					-28.3	-0.03384	-0.03367
	-28.2	0.386556	-0.65104					-28.2	0.386556	-0.65104					-28.2	-0.03361	-0.03014
	-28.1	0.996907	-0.30518					-28.1	0.996907	-0.30518					-28.1	-0.03305	-0.03312
	-28	0.793457	0.366211					-28	0.793457	0.366211					-28	-0.03343	-0.03134
	-27.9	0.651042	-0.79346					-27.9	0.651042	-0.79346					-27.9	-0.03382	-0.03124
	-27.8	-0.12207	0.101725					-27.8	-0.12207	0.101725					-27.8	-0.034	-0.03326
	-27.7	0.386556	-0.91553					-27.7	0.386556	-0.91553					-27.7	-0.03218	-0.03153
	-27.6	1.42415	0.04069					-27.6	1.42415	0.04069					-27.6	-0.0308	-0.03007
	-27.5	1.11898	-1.6276					-27.5	1.11898	-1.6276					-27.5	-0.02926	-0.03165
	-27.4	0.549316	-0.04069					-27.4	0.549316	-0.04069					-27.4	-0.03217	-0.02879
	-27.3	1.0376	-0.50863					-27.3	1.0376	-0.50863					-27.3	-0.02775	-0.0289
	-27.2	1.72933	-1.05794					-27.2	1.72933	-1.05794					-27.2	-0.03153	-0.02814
	-27.1	1.34277	-0.26449					-27.1	1.34277	-0.26449					-27.1	-0.03207	-0.02755
	-27	1.60726	-0.48828					-27	1.60726	-0.48828					-27	-0.02909	-0.02967
	-26.9	0.976562	0.406901					-26.9	0.976562	0.406901					-26.9	-0.0273	-0.02734
	-26.8	0.915527	-1.07829					-26.8	0.915527	-1.07829					-26.8	-0.02921	-0.02942
	-26.7	0.671387	0.528971					-26.7	0.671387	0.528971					-26.7	-0.02841	-0.02775
	-26.6	1.18001	-0.18311					-26.6	1.18001	-0.18311					-26.6	-0.02683	-0.02619
	-26.5	1.52588	-0.02035					-26.5	1.52588	-0.02035					-26.5	-0.02842	-0.0257
	-26.4	1.58691	-0.50863					-26.4	1.58691	-0.50863					-26.4	-0.02609	-0.02237
	-26.3	0.732422	0.183105					-26.3	0.732422	0.183105					-26.3	-0.02632	-0.02754
	-26.2	2.23795	0.732422					-26.2	2.23795	0.732422					-26.2	-0.0265	-0.02117
	-26.1	1.01725	-0.26449					-26.1	1.01725	-0.26449					-26.1	-0.02511	-0.0253
	-26	1.4445	0.061035					-26	1.4445	0.061035					-26	-0.02582	-0.02088
	-25.9	0.244141	0.671387					-25.9	0.244141	0.671387					-25.9	-0.02498	-0.02445
	-25.8	2.13623	1.24105					-25.8	2.13623	1.24105					-25.8	-0.02603	-0.0207
	-25.7	0.671387	-0.99691					-25.7	0.671387	-0.99691					-25.7	-0.02607	-0.02389
	-25.6	1.34277	0.406901					-25.6	1.34277	0.406901					-25.6	-0.02388	-0.02163
	-25.5	0.732422	0.16276					-25.5	0.732422	0.16276					-25.5	-0.02581	-0.02325
	-25.4	0.915527	0.610352					-25.4	0.915527	0.610352					-25.4	-0.02409	-0.02195
	-25.3	0.813802	0.447591					-25.3	0.813802	0.447591					-25.3	-0.02337	-0.02129
	-25.2	2.07519	0.020345					-25.2	2.07519	0.020345					-25.2	-0.02217	-0.02141
	-25.1	1.09863	1.0376					-25.1	1.09863	1.0376					-25.1	-0.02274	-0.01995
	-25	1.66829	0.223796					-25	1.66829	0.223796					-25	-0.02183	-0.02032
	-24.9	1.99381	1.38346					-24.9	1.99381	1.38346					-24.9	-0.02262	-0.01759
	-24.8	1.60726	0.671387					-24.8	1.60726	0.671387					-24.8	-0.02163	-0.02055
	-24.7	1.46484	0.427246					-24.7	1.46484	0.427246					-24.7	-0.02132	-0.01901
	-24.6	2.80762	0.264486					-24.6	2.80762	0.264486					-24.6	-0.01848	-0.0205
	-24.5	3.19417	-0.30518					-24.5	3.19417	-0.30518					-24.5	-0.02032	-0.01982
	-24.4	1.11898	0.732422					-24.4	1.11898	0.732422					-24.4	-0.01969	-0.01785
	-24.3	1.66829	0.488281					-24.3	1.66829	0.488281					-24.3	-0.01942	-0.02103
	-24.2	2.64486	-0.10173					-24.2	2.64486	-0.10173					-24.2	-0.01793	-0.01428
	-24.1	1.26139	0.752767					-24.1	1.26139	0.752767					-24.1	-0.01755	-0.01788
	-24	1.15967	0.752767					-24	1.15967	0.752767					-24	-0.01723	-0.01561
	-23.9	2.889	0.630697					-23.9	2.889	0.630697					-23.9	-0.01833	-0.01541
	-23.8	2.36003	0.712077					-23.8	2.36003	0.712077					-23.8	-0.01761	-0.01394
	-23.7	1.97347	0.549316					-23.7	1.97347	0.549316					-23.7	-0.01611	-0.01602
	-23.6	2.46175	0.16276					-23.6	2.46175	0.16276					-23.6	-0.01635	-0.01459
	-23.5	1.24105	0.386556					-23.5	1.24105	0.386556					-23.5	-0.01532	-0.01504
	-23.4	1.6276	0.061035					-23.4	1.6276	0.061035					-23.4	-0.01553	-0.01621
	-23.3	2.62451	0.590006					-23.3	2.62451	0.590006					-23.3	-0.01522	-0.01113
	-23.2	2.31934	-0.36621					-23.2	2.31934	-0.36621					-23.2	-0.01469	-0.01445
	-23.1	2.2583	0.366211					-23.1	2.2583	0.366211					-23.1	-0.01401	-0.01393
	-23	2.17692	1.32243					-23	2.17692	1.32243					-23	-0.01462	-0.01364
	-22.9	2.0345	0.020345					-22.9	2.0345	0.020345					-22.9	-0.01321	-0.01118
	-22.8	2.90934	0.956217					-22.8	2.90934	0.956217					-22.8	-0.01335	-0.00999
	-22.7	2.78727	0.793457					-22.7	2.78727	0.793457					-22.7	-0.01264	-0.00984
	-22.6	3.2959	0.244141					-22.6	3.2959	0.244141					-22.6	-0.0144	-0.01068
	-22.5	1.48519	1.97347					-22.5	1.48519	1.97347					-22.5	-0.01104	-0.00969
	-22.4	2.23796	1.11898					-22.4	2.23796	1.11898					-22.4	-0.01165	-0.01042
	-22.3	2.46175	0.935872					-22.3	2.46175	0.935872					-22.3	-0.00993	-0.00873
	-22.2	1.64795	1.79036					-22.2	1.64795	1.79036					-22.2	-0.01099	-0.01182
	-22.1	2.11589	1.24105					-22.1	2.11589	1.24105					-22.1	-0.01075	-0.01065
	-22	2.60417	1.0376					-22	2.60417	1.0376					-22	-0.01043	-0.0088
	-21.9	2.86865	0.406901					-21.9	2.86865	0.406901					-21.9	-0.00991	-0.00911
	-21.8	1.95312	1.6276					-21.8	1.95312	1.6276					-21.8	-0.0082	-0.0052
	-21.7	2.92969	1.46484					-21.7	2.92969	1.46484					-21.7	-0.01031	-0.00793
	-21.6	1.97347	1.24105					-21.6	1.97347	1.24105					-21.6	-0.00735	-0.00656
	-21.5	2.58382	2.05485					-21.5	2.58382	2.05485					-21.5	-0.00638	-0.00764
	-21.4	2.72624	1.81071					-21.4	2.72624	1.81071					-21.4	-0.00724	-0.00742
	-21.3	3.2959	2.33968					-21.3	3.2959	2.33968					-21.3	-0.00546	-0.00372
	-21.2	2.889	1.2207					-21.2	2.889	1.2207					-21.2	-0.00646	-0.00676
	-21.1	3.98763	0.813802					-21.1	3.98763	0.813802					-21.1	-0.00551	-0.00487
	-21	3.43831	1.15967					-21	3.43831	1.15967					-21	-0.00486	-0.00742
	-20.9	3.23486	1.91244					-20.9	3.23486	1.91244					-20.9	-0.00498	-0.00573
	-20.8	3.92659	1.46484					-20.8	3.92659	1.46484					-20.8	-0.00441	-0.00811
	-20.7	2.80762	1.48519					-20.7	2.80762	1.48519					-20.7	-0.00472	-0.00211
	-20.6	2.50244	0.915527					-20.6	2.50244	0.915527					-20.6	-0.0027	-0.00364
	-20.5	3.43831	2.17692					-20.5	3.43831	2.17692					-20.5	-0.00229	-0.00241
	-20.4	3.25521	1.93278					-20.4	3.25521	1.93278					-20.4	-0.00235	-0.00147
	-20.3	2.58382	1.4445					-20.3	2.58382	1.4445					-20.3	-0.00154	-0.00178
	-20.2	2.99072	1.54622					-20.2	2.99072	1.54622					-20.2	-0.00137	-0.00093
	-20.1	3.68245	1.42415					-20.1	3.68245	1.42415					-20.1	-0.00047	-0.00056
	-20	3.62142	1.34277					-20	3.62142	1.34277					-20	-2.3e-06	-0.00381
	-19.9	3.23486	0.549316					-19.9	3.23486	0.549316					-19.9	-0.00158	-0.00027
	-19.8	2.889	0.305176					-19.8	2.889	0.305176					-19.8	-0.001	-0.00094
	-19.7	4.02832	1.74967					-19.7	4.02832	1.74967					-19.7	0.000986	0.006721
	-19.6	2.78727	1.68864					-19.6	2.78727	1.68864					-19.6	0.001702	0.002381
	-19.5	3.72314	0.976562					-19.5	3.72314	0.976562					-19.5	0.000798	0.004778
	-19.4	3.27555	2.07519					-19.4	3.27555	2.07519					-19.4	0.002514	0.002224
	-19.3	3.39762	1.48519					-19.3	3.39762	1.48519					-19.3	0.002728	0.004507
	-19.2	3.01107	1.26139					-19.2	3.01107	1.26139					-19.2	0.003502	0.004042
	-19.1	4.29281	2.40072					-19.1	4.29281	2.40072					-19.1	0.002541	0.004273
	-19	3.58073	1.64795					-19	3.58073	1.64795					-19	0.00365	0.001654
	-18.9	3.62142	1.6276					-18.9	3.62142	1.6276					-18.9	0.00016	0.002461
	-18.8	2.82796	1.6276					-18.8	2.82796	1.6276					-18.8	0.007036	0.002741
	-18.7	3.84522	2.15658					-18.7	3.84522	2.15658					-18.7	0.004625	0.004868
	-18.6	3.13314	1.91244					-18.6	3.13314	1.91244					-18.6	0.005616	0.007571
	-18.5	3.98763	0.732422					-18.5	3.98763	0.732422					-18.5	0.004083	0.003995
	-18.4	3.13314	2.889					-18.4	3.13314	2.889					-18.4	0.00764	0.009189
	-18.3	3.51969	2.64486					-18.3	3.51969	2.64486					-18.3	0.007502	0.009411
	-18.2	3.60107	2.11589					-18.2	3.60107	2.11589					-18.2	0.008562	0.007306
	-18.1	2.95003	2.99072					-18.1	2.95003	2.99072					-18.1	0.008144	0.008414
	-18	3.80452	3.05176					-18	3.80452	3.05176					-18	0.008017	0.008753
	-17.9	4.31315	2.82796					-17.9	4.31315	2.82796					-17.9	0.009241	0.007218
	-17.8	3.0721	1.32243					-17.8	3.0721	1.32243					-17.8	0.007738	0.008184
	-17.7	4.43522	2.46175					-17.7	4.43522	2.46175					-17.7	0.007862	0.007461
	-17.6	4.86247	2.19726					-17.6	4.86247	2.19726					-17.6	0.010472	0.011138
	-17.5	3.68245	2.21761					-17.5	3.68245	2.21761					-17.5	0.011157	0.011544
	-17.4	3.82487	2.15658					-17.4	3.82487	2.15658					-17.4	0.011436	0.011959
	-17.3	4.00798	2.84831					-17.3	4.00798	2.84831					-17.3	0.012716	0.011905
	-17.2	4.04866	2.27865					-17.2	4.04866	2.27865					-17.2	0.01186	0.01251
	-17.1	4.82178	3.17383					-17.1	4.82178	3.17383					-17.1	0.014521	0.013308
	-17	3.49935	2.05485					-17	3.49935	2.05485					-17	0.011847	0.012489
	-16.9	4.06901	3.01107					-16.9	4.06901	3.01107					-16.9	0.012351	0.016448
	-16.8	5.00488	1.56657					-16.8	5.00488	1.56657					-16.8	0.013825	0.011105
	-16.7	4.02832	2.33968					-16.7	4.02832	2.33968					-16.7	0.014581	0.011608
	-16.6	4.29281	2.33968					-16.6	4.29281	2.33968					-16.6	0.013322	0.012753
	-16.5	5.12695	2.4821					-16.5	5.12695	2.4821					-16.5	0.015635	0.017793
	-16.4	4.65902	1.48519					-16.4	4.65902	1.48519					-16.4	0.014173	0.016352
	-16.3	4.49626	2.889					-16.3	4.49626	2.889					-16.3	0.016543	0.015916
	-16.2	4.69971	2.64486					-16.2	4.69971	2.64486					-16.2	0.014979	0.017436
	-16.1	4.25211	2.82796					-16.1	4.25211	2.82796					-16.1	0.019333	0.02043
	-16	4.63867	2.84831					-16	4.63867	2.84831					-16	0.017487	0.019743
	-15.9	5.28971	2.07519					-15.9	5.28971	2.07519					-15.9	0.018675	0.019412
	-15.8	4.43522	3.01107					-15.8	4.43522	3.01107					-15.8	0.017977	0.015074
	-15.7	4.19108	3.51969					-15.7	4.19108	3.51969					-15.7	0.018254	0.020258
	-15.6	4.08936	2.74658					-15.6	4.08936	2.74658					-15.6	0.018161	0.015532
	-15.5	3.98763	2.92969					-15.5	3.98763	2.92969					-15.5	0.017699	0.019045
	-15.4	4.17073	2.74658					-15.4	4.17073	2.74658					-15.4	0.02084	0.018838
	-15.3	4.29281	3.58073					-15.3	4.29281	3.58073					-15.3	0.018924	0.022455
	-15.2	4.72005	2.60417					-15.2	4.72005	2.60417					-15.2	0.020314	0.021549
	-15.1	3.96728	3.03141					-15.1	3.96728	3.03141					-15.1	0.023649	0.021579
	-15	4.37419	3.7028					-15	4.37419	3.7028					-15	0.021397	0.022163
	-14.9	4.02832	3.17383					-14.9	4.02832	3.17383					-14.9	0.023258	0.021241
	-14.8	3.74349	4.23177					-14.8	3.74349	4.23177					-14.8	0.022784	0.022555
	-14.7	4.47591	4.39453					-14.7	4.47591	4.39453					-14.7	0.024637	0.024713
	-14.6	5.18799	3.27555					-14.6	5.18799	3.27555					-14.6	0.022572	0.02173
	-14.5	4.35384	2.33968					-14.5	4.35384	2.33968					-14.5	0.023842	0.026014
	-14.4	5.57454	2.31934					-14.4	5.57454	2.31934					-14.4	0.026379	0.022629
	-14.3	5.1473	3.27555					-14.3	5.1473	3.27555					-14.3	0.026474	0.021882
	-14.2	4.23177	3.11279					-14.2	4.23177	3.11279					-14.2	0.026217	0.026215
	-14.1	5.57454	2.76693					-14.1	5.57454	2.76693					-14.1	0.02773	0.02623
	-14	5.85938	3.21452					-14	5.85938	3.21452					-14	0.027242	0.027085
	-13.9	5.43213	2.58382					-13.9	5.43213	2.58382					-13.9	0.028423	0.025855
	-13.8	5.47282	4.25212					-13.8	5.47282	4.25212					-13.8	0.028567	0.031285
	-13.7	5.47282	3.45866					-13.7	5.47282	3.45866					-13.7	0.029074	0.028015
	-13.6	5.67627	4.25212					-13.6	5.67627	4.25212					-13.6	0.029402	0.028676
	-13.5	4.67936	3.0721					-13.5	4.67936	3.0721					-13.5	0.030397	0.029842
	-13.4	5.85938	2.78727					-13.4	5.85938	2.78727					-13.4	0.028438	0.030121
	-13.3	5.47282	3.0721					-13.3	5.47282	3.0721					-13.3	0.031195	0.028415
	-13.2	5.61523	3.33659					-13.2	5.61523	3.33659					-13.2	0.030538	0.030716
	-13.1	4.84212	3.35693					-13.1	4.84212	3.35693					-13.1	0.031256	0.03235
	-13	4.96419	3.80452					-13	4.96419	3.80452					-13	0.032903	0.032522
	-12.9	5.69661	3.51969					-12.9	5.69661	3.51969					-12.9	0.032107	0.031508
	-12.8	5.08626	2.82796					-12.8	5.08626	2.82796					-12.8	0.034431	0.0377
	-12.7	5.7373	4.25212					-12.7	5.7373	4.25212					-12.7	0.033688	0.03339
	-12.6	5.90006	3.84522					-12.6	5.90006	3.84522					-12.6	0.033059	0.034361
	-12.5	5.75765	4.57764					-12.5	5.75765	4.57764					-12.5	0.034265	0.033629
	-12.4	5.3304	4.06901					-12.4	5.3304	4.06901					-12.4	0.036479	0.036355
	-12.3	5.67627	3.39762					-12.3	5.67627	3.39762					-12.3	0.03506	0.032817
	-12.2	4.98454	3.76383					-12.2	4.98454	3.76383					-12.2	0.034643	0.032594
	-12.1	3.78418	3.05176					-12.1	3.78418	3.05176					-12.1	0.036425	0.034615
	-12	5.31006	4.5166					-12	5.31006	4.5166					-12	0.03583	0.035846
	-11.9	5.31006	4.37419					-11.9	5.31006	4.37419					-11.9	0.037411	0.037171
	-11.8	6.08317	4.49626					-11.8	6.08317	4.49626					-11.8	0.037222	0.036219
	-11.7	5.71696	4.82178					-11.7	5.71696	4.82178					-11.7	0.039213	0.037722
	-11.6	5.43213	3.90625					-11.6	5.43213	3.90625					-11.6	0.040357	0.038657
	-11.5	6.51042	5.16764					-11.5	6.51042	5.16764					-11.5	0.040448	0.03642
	-11.4	5.57454	4.63867					-11.4	5.57454	4.63867					-11.4	0.040893	0.037289
	-11.3	6.71387	4.47591					-11.3	6.71387	4.47591					-11.3	0.041106	0.041243
	-11.2	5.98144	4.86247					-11.2	5.98144	4.86247					-11.2	0.041055	0.03985
	-11.1	6.12386	3.56038					-11.1	6.12386	3.56038					-11.1	0.042243	0.039124
	-11	6.83594	4.15039					-11	6.83594	4.15039					-11	0.04219	0.036478
	-10.9	6.7749	4.23177					-10.9	6.7749	4.23177					-10.9	0.042334	0.038271
	-10.8	5.53385	5.10661					-10.8	5.53385	5.10661					-10.8	0.044198	0.04322
	-10.7	6.20524	4.57764					-10.7	6.20524	4.57764					-10.7	0.044282	0.041919
	-10.6	6.22558	3.82487					-10.6	6.22558	3.82487					-10.6	0.044185	0.043488
	-10.5	6.46973	4.23177					-10.5	6.46973	4.23177					-10.5	0.045218	0.044613
	-10.4	6.97835	6.26628					-10.4	6.97835	6.26628					-10.4	0.04541	0.042716
	-10.3	5.85938	4.59798					-10.3	5.85938	4.59798					-10.3	0.044976	0.044716
	-10.2	6.65283	3.98763					-10.2	6.65283	3.98763					-10.2	0.046866	0.041773
	-10.1	6.73421	4.04866					-10.1	6.73421	4.04866					-10.1	0.047318	0.043154
	-10	7.30387	3.74349					-10	7.30387	3.74349					-10	0.04773	0.045523
	-9.9	6.49007	4.45557					-9.9	6.49007	4.45557					-9.9	0.047444	0.04646
	-9.8	6.95801	4.84212					-9.8	6.95801	4.84212					-9.8	0.048788	0.045533
	-9.7	6.7749	4.29281					-9.7	6.7749	4.29281					-9.7	0.048258	0.047138
	-9.6	6.04248	4.19108					-9.6	6.04248	4.19108					-9.6	0.050461	0.046579
	-9.5	5.90006	5.39144					-9.5	5.90006	5.39144					-9.5	0.049878	0.048378
	-9.4	6.89697	4.35384					-9.4	6.89697	4.35384					-9.4	0.05124	0.048708
	-9.3	6.32731	5.12695					-9.3	6.32731	5.12695					-9.3	0.050599	0.052211
	-9.2	6.65283	5.31006					-9.2	6.65283	5.31006					-9.2	0.050387	0.049646
	-9.1	6.91732	5.7373					-9.1	6.91732	5.7373					-9.1	0.050959	0.04897
	-9	7.20215	5.08626					-9	7.20215	5.08626					-9	0.052776	0.050143
	-8.9	6.83594	5.18799					-8.9	6.83594	5.18799					-8.9	0.052616	0.052436
	-8.8	6.57145	3.96728					-8.8	6.57145	3.96728					-8.8	0.054024	0.052181
	-8.7	6.30696	5.41178					-8.7	6.30696	5.41178					-8.7	0.054268	0.05144
	-8.6	7.14111	5.51351					-8.6	7.14111	5.51351					-8.6	0.054423	0.052827
	-8.5	6.32731	5.75765					-8.5	6.32731	5.75765					-8.5	0.054503	0.053553
	-8.4	6.91732	5.20833					-8.4	6.91732	5.20833					-8.4	0.055175	0.052641
	-8.3	6.46973	4.96419					-8.3	6.46973	4.96419					-8.3	0.05755	0.056621
	-8.2	7.50732	5.69661					-8.2	7.50732	5.69661					-8.2	0.058398	0.054213
	-8.1	6.22558	4.9235					-8.1	6.22558	4.9235					-8.1	0.057255	0.056366
	-8	7.12077	5.98144					-8	7.12077	5.98144					-8	0.058215	0.054151
	-7.9	7.4056	6.30696					-7.9	7.4056	6.30696					-7.9	0.058697	0.05258
	-7.8	7.60905	5.16764					-7.8	7.60905	5.16764					-7.8	0.059198	0.055304
	-7.7	8.09733	5.43213					-7.7	8.09733	5.43213					-7.7	0.058458	0.056278
	-7.6	7.08008	5.45247					-7.6	7.08008	5.45247					-7.6	0.059295	0.056342
	-7.5	7.36491	5.43213					-7.5	7.36491	5.43213					-7.5	0.061111	0.059469
	-7.4	7.5887	5.28971					-7.4	7.5887	5.28971					-7.4	0.062615	0.059115
	-7.3	7.42594	6.65283					-7.3	7.42594	6.65283					-7.3	0.063569	0.058854
	-7.2	7.22249	5.53385					-7.2	7.22249	5.53385					-7.2	0.063632	0.065438
	-7.1	6.89697	4.45557					-7.1	6.89697	4.45557					-7.1	0.063992	0.058257
	-7	8.01595	5.83903					-7	8.01595	5.83903					-7	0.064892	0.062214
	-6.9	8.19906	5.71696					-6.9	8.19906	5.71696					-6.9	0.064683	0.05874
	-6.8	8.2194	4.9235					-6.8	8.2194	4.9235					-6.8	0.063439	0.060095
	-6.7	8.30078	5.57454					-6.7	8.30078	5.57454					-6.7	0.064099	0.060747
	-6.6	7.32422	5.61523					-6.6	7.32422	5.61523					-6.6	0.066619	0.061993
	-6.5	7.32422	5.1473					-6.5	7.32422	5.1473					-6.5	0.067755	0.065139
	-6.4	7.77181	5.75765					-6.4	7.77181	5.75765					-6.4	0.066883	0.067146
	-6.3	7.26318	6.04248					-6.3	7.26318	6.04248					-6.3	0.067732	0.062932
	-6.2	8.15836	5.59489					-6.2	8.15836	5.59489					-6.2	0.069142	0.068337
	-6.1	8.78906	5.39144					-6.1	8.78906	5.39144					-6.1	0.068957	0.069315
	-6	8.54492	5.69661					-6	8.54492	5.69661					-6	0.069643	0.067868
	-5.9	7.87354	6.04248					-5.9	7.87354	6.04248					-5.9	0.070678	0.070774
	-5.8	7.12077	6.16455					-5.8	7.12077	6.16455					-5.8	0.071343	0.069552
	-5.7	7.73112	6.02213					-5.7	7.73112	6.02213					-5.7	0.069017	0.066372
	-5.6	8.70768	5.77799					-5.6	8.70768	5.77799					-5.6	0.072588	0.066975
	-5.5	7.9956	6.22558					-5.5	7.9956	6.22558					-5.5	0.071852	0.067733
	-5.4	7.71077	5.37109					-5.4	7.71077	5.37109					-5.4	0.071642	0.070982
	-5.3	9.13493	7.16146					-5.3	9.13493	7.16146					-5.3	0.074627	0.067585
	-5.2	8.17871	6.32731					-5.2	8.17871	6.32731					-5.2	0.074562	0.068243
	-5.1	8.87044	7.16146					-5.1	8.87044	7.16146					-5.1	0.074632	0.073931
	-5	7.79215	6.81559					-5	7.79215	6.81559					-5	0.077224	0.070328
	-4.9	8.89079	7.64974					-4.9	8.89079	7.64974					-4.9	0.074815	0.073585
	-4.8	8.34147	7.30387					-4.8	8.34147	7.30387					-4.8	0.076212	0.071502
	-4.7	8.99251	6.38835					-4.7	8.99251	6.38835					-4.7	0.075914	0.074866
	-4.6	8.50423	7.26318					-4.6	8.50423	7.26318					-4.6	0.078777	0.07442
	-4.5	8.13802	7.26318					-4.5	8.13802	7.26318					-4.5	0.079187	0.072953
	-4.4	7.14111	6.67318					-4.4	7.14111	6.67318					-4.4	0.079413	0.072345
	-4.3	8.72803	6.7749					-4.3	8.72803	6.7749					-4.3	0.080824	0.071195
	-4.2	7.97526	6.24593					-4.2	7.97526	6.24593					-4.2	0.081118	0.074734
	-4.1	8.01595	6.44938					-4.1	8.01595	6.44938					-4.1	0.081245	0.077402
	-4	9.19596	6.44938					-4	9.19596	6.44938					-4	0.082709	0.076786
	-3.9	8.42285	6.65283					-3.9	8.42285	6.65283					-3.9	0.083605	0.078741
	-3.8	9.50114	7.16146					-3.8	9.50114	7.16146					-3.8	0.083992	0.081768
	-3.7	8.99251	7.24284					-3.7	8.99251	7.24284					-3.7	0.085185	0.078962
	-3.6	8.48389	6.71387					-3.6	8.48389	6.71387					-3.6	0.083123	0.079502
	-3.5	8.80941	7.03939					-3.5	8.80941	7.03939					-3.5	0.084233	0.078268
	-3.4	9.52148	5.77799					-3.4	9.52148	5.77799					-3.4	0.085836	0.083439
	-3.3	9.96907	6.83594					-3.3	9.96907	6.83594					-3.3	0.08539	0.080294
	-3.2	8.34147	7.44629					-3.2	8.34147	7.44629					-3.2	0.087894	0.08181
	-3.1	8.76872	5.85938					-3.1	8.76872	5.85938					-3.1	0.085406	0.088094
	-3	9.4401	7.22249					-3	9.4401	7.22249					-3	0.088673	0.085146
	-2.9	8.97217	7.38525					-2.9	8.97217	7.38525					-2.9	0.087131	0.085414
	-2.8	8.23974	6.49007					-2.8	8.23974	6.49007					-2.8	0.088494	0.083899
	-2.7	8.6263	6.97835					-2.7	8.6263	6.97835					-2.7	0.089052	0.084559
	-2.6	8.78906	6.81559					-2.6	8.78906	6.81559					-2.6	0.091133	0.083683
	-2.5	8.36181	7.44629					-2.5	8.36181	7.44629					-2.5	0.089498	0.090844
	-2.4	9.60286	6.55111					-2.4	9.60286	6.55111					-2.4	0.091242	0.087325
	-2.3	8.87044	7.62939					-2.3	8.87044	7.62939					-2.3	0.092631	0.08507
	-2.2	9.23665	7.38525					-2.2	9.23665	7.38525					-2.2	0.092001	0.087486
	-2.1	8.48389	8.32113					-2.1	8.48389	8.32113					-2.1	0.092812	0.085379
	-2	8.80941	6.24593					-2	8.80941	6.24593					-2	0.093707	0.089545
	-1.9	8.60596	6.89697					-1.9	8.60596	6.89697					-1.9	0.091219	0.090304
	-1.8	9.37907	6.93766					-1.8	9.37907	6.93766					-1.8	0.097013	0.09034
	-1.7	8.8501	7.42594					-1.7	8.8501	7.42594					-1.7	0.095902	0.091237
	-1.6	9.50114	7.75146					-1.6	9.50114	7.75146					-1.6	0.097058	0.092008
	-1.5	8.87044	7.8125					-1.5	8.87044	7.8125					-1.5	0.095332	0.093204
	-1.4	9.33838	8.0363					-1.4	9.33838	8.0363					-1.4	0.097637	0.095007
	-1.3	9.60286	8.19906					-1.3	9.60286	8.19906					-1.3	0.098059	0.092895
	-1.2	9.78597	7.77181					-1.2	9.78597	7.77181					-1.2	0.098752	0.092984
	-1.1	9.4401	7.87353					-1.1	9.4401	7.87353					-1.1	0.099768	0.090913
	-1	9.82666	7.73112					-1	9.82666	7.73112					-1	0.099298	0.093981
	-0.9	10.1522	7.5887					-0.9	10.1522	7.5887					-0.9	0.102205	0.095818
	-0.8	9.82666	7.85319					-0.8	9.82666	7.85319					-0.8	0.10143	0.094606
	-0.7	10.8032	7.30387					-0.7	10.8032	7.30387					-0.7	0.101314	0.098729
	-0.6	9.15527	7.99561					-0.6	9.15527	7.99561					-0.6	0.104158	0.098513
	-0.5	10.3556	8.64665					-0.5	10.3556	8.64665					-0.5	0.103637	0.098691
	-0.4	10.3149	7.14111					-0.4	10.3149	7.14111					-0.4	0.106366	0.098488
	-0.3	9.96907	7.60905					-0.3	9.96907	7.60905					-0.3	0.102615	0.099214
	-0.2	9.88769	7.46663					-0.2	9.88769	7.46663					-0.2	0.10545	0.099091
	-0.1	10.5184	7.50732					-0.1	10.5184	7.50732					-0.1	0.106563	0.100958
	0	10.2132	7.50732					0	10.2132	7.50732					0	0.105442	0.096705
	0.099998	11.0881	7.24284					0.099998	11.0881	7.24284					0.099998	0.106631	0.104014
	0.200001	10.5591	7.89388					0.200001	10.5591	7.89388					0.200001	0.106231	0.101392
	0.299999	9.27734	8.01595					0.299999	9.27734	8.01595					0.299999	0.108845	0.10405
	0.400002	10.2132	6.83594					0.400002	10.2132	6.83594					0.400002	0.108851	0.10625
	0.5	9.64355	7.8125					0.5	9.64355	7.8125					0.5	0.110073	0.104371
	0.599998	10.7625	7.4056					0.599998	10.7625	7.4056					0.599998	0.112284	0.106341
	0.700001	9.96907	7.93457					0.700001	9.96907	7.93457					0.700001	0.110692	0.107444
	0.799999	10.1929	8.05664					0.799999	10.1929	8.05664					0.799999	0.11046	0.106869
	0.900002	9.31803	7.99561					0.900002	9.31803	7.99561					0.900002	0.112788	0.106633
	1	9.62321	8.99251					1	9.62321	8.99251					1	0.114318	0.106018
	1.1	10.6201	8.23974					1.1	10.6201	8.23974					1.1	0.112781	0.10488
	1.2	10.6201	7.75146					1.2	10.6201	7.75146					1.2	0.112877	0.106734
	1.3	9.70459	7.36491					1.3	9.70459	7.36491					1.3	0.113659	0.110477
	1.4	10.6405	8.97217					1.4	10.6405	8.97217					1.4	0.115595	0.110095
	1.5	9.78597	8.56527					1.5	9.78597	8.56527					1.5	0.116613	0.112324
	1.6	9.94873	8.50423					1.6	9.94873	8.50423					1.6	0.116946	0.109901
	1.7	10.6405	8.99251					1.7	10.6405	8.99251					1.7	0.117787	0.113164
	1.8	9.94873	9.41976					1.8	9.94873	9.41976					1.8	0.117694	0.107313
	1.9	10.2946	8.07699					1.9	10.2946	8.07699					1.9	0.118841	0.110139
	2	10.3963	9.6639					2	10.3963	9.6639					2	0.1184	0.111534
	2.1	10.8439	8.23974					2.1	10.8439	8.23974					2.1	0.120169	0.111249
	2.2	11.4949	8.68734					2.2	11.4949	8.68734					2.2	0.119195	0.114459
	2.3	10.5591	8.34147					2.3	10.5591	8.34147					2.3	0.120629	0.112119
	2.4	10.8236	8.56527					2.4	10.8236	8.56527					2.4	0.121308	0.113126
	2.5	10.7625	7.64974					2.5	10.7625	7.64974					2.5	0.124395	0.11781
	2.6	11.3525	8.70768					2.6	11.3525	8.70768					2.6	0.124199	0.116446
	2.7	10.4777	8.87044					2.7	10.4777	8.87044					2.7	0.124241	0.119156
	2.8	11.5967	8.70768					2.8	11.5967	8.70768					2.8	0.125155	0.116689
	2.9	11.4543	10.0098					2.9	11.4543	10.0098					2.9	0.124284	0.116006
	3	11.1287	9.62321					3	11.1287	9.62321					3	0.127912	0.121898
	3.1	11.7391	8.48389					3.1	11.7391	8.48389					3.1	0.126952	0.120662
	3.2	11.0067	8.76872					3.2	11.0067	8.76872					3.2	0.127923	0.118725
	3.3	11.1694	8.32113					3.3	11.1694	8.32113					3.3	0.129077	0.120983
	3.4	11.3118	8.05664					3.4	11.3118	8.05664					3.4	0.127746	0.119709
	3.5	10.9456	7.34456					3.5	10.9456	7.34456					3.5	0.130346	0.124781
	3.6	11.8205	8.82975					3.6	11.8205	8.82975					3.6	0.12997	0.121419
	3.7	11.0881	8.89079					3.7	11.0881	8.89079					3.7	0.130491	0.126884
	3.8	11.3118	7.9956					3.8	11.3118	7.9956					3.8	0.132194	0.125856
	3.9	11.9425	8.6263					3.9	11.9425	8.6263					3.9	0.131069	0.12699
	4	11.0881	9.64355					4	11.0881	9.64355					4	0.134086	0.129053
	4.1	10.7829	8.82975					4.1	10.7829	8.82975					4.1	0.134039	0.128527
	4.2	11.6374	10.5184					4.2	11.6374	10.5184					4.2	0.135323	0.125384
	4.3	11.0474	9.17562					4.3	11.0474	9.17562					4.3	0.136048	0.125755
	4.4	10.8236	10.3149					4.4	10.8236	10.3149					4.4	0.134803	0.12559
	4.5	11.6374	9.37907					4.5	11.6374	9.37907					4.5	0.136531	0.127328
	4.6	10.5591	8.78906					4.6	10.5591	8.78906					4.6	0.138782	0.128386
	4.7	12.1257	8.68734					4.7	12.1257	8.68734					4.7	0.138937	0.130691
	4.8	11.3932	11.5356					4.8	11.3932	11.5356					4.8	0.139947	0.130573
	4.9	11.1084	8.68734					4.9	11.1084	8.68734					4.9	0.139607	0.136025
	5	11.2101	10.1522					5	11.2101	10.1522					5	0.142622	0.135551
	5.1	12.4919	9.54183					5.1	12.4919	9.54183					5.1	0.142244	0.130214
	5.2	12.7157	10.0708					5.2	12.7157	10.0708					5.2	0.140276	0.134843
	5.3	10.5591	10.4167					5.3	10.5591	10.4167					5.3	0.142574	0.132839
	5.4	11.9018	9.52148					5.4	11.9018	9.52148					5.4	0.143287	0.1304
	5.5	11.2101	9.82666					5.5	11.2101	9.82666					5.5	0.142437	0.133586
	5.6	12.1257	9.78597					5.6	12.1257	9.78597					5.6	0.145012	0.135007
	5.7	12.3698	8.82975					5.7	12.3698	8.82975					5.7	0.145211	0.133701
	5.8	12.3901	9.62321					5.8	12.3901	9.62321					5.8	0.149253	0.137137
	5.9	12.146	9.96907					5.9	12.146	9.96907					5.9	0.148112	0.140272
	6	13.4684	10.437					6	13.4684	10.437					6	0.147258	0.137622
	6.1	12.5529	10.3353					6.1	12.5529	10.3353					6.1	0.149845	0.137032
	6.2	11.5763	10.0911					6.2	11.5763	10.0911					6.2	0.149573	0.140235
	6.3	12.8174	10.0708					6.3	12.8174	10.0708					6.3	0.150898	0.141821
	6.4	12.5326	10.2336					6.4	12.5326	10.2336					6.4	0.15146	0.144489
	6.5	12.7157	10.4574					6.5	12.7157	10.4574					6.5	0.152388	0.141389
	6.6	11.8001	9.50114					6.6	11.8001	9.50114					6.6	0.155089	0.139956
	6.7	13.4684	10.1725					6.7	13.4684	10.1725					6.7	0.15464	0.140216
	6.8	13.3057	9.46045					6.8	13.3057	9.46045					6.8	0.154998	0.144509
	6.9	11.7798	8.99251					6.9	11.7798	8.99251					6.9	0.156755	0.142413
	7	12.6343	10.2336					7	12.6343	10.2336					7	0.154797	0.14597
	7.1	12.3698	9.88769					7.1	12.3698	9.88769					7.1	0.155531	0.147326
	7.2	12.5122	10.8643					7.2	12.5122	10.8643					7.2	0.157839	0.148247
	7.3	12.6343	9.72493					7.3	12.6343	9.72493					7.3	0.15792	0.148107
	7.4	12.7157	10.8439					7.4	12.7157	10.8439					7.4	0.158147	0.146329
	7.5	12.5529	10.3353					7.5	12.5529	10.3353					7.5	0.159064	0.147091
	7.6	12.2274	11.0881					7.6	12.2274	11.0881					7.6	0.159596	0.148055
	7.7	13.0412	10.1115					7.7	13.0412	10.1115					7.7	0.157337	0.150418
	7.8	12.0036	10.5794					7.8	12.0036	10.5794					7.8	0.161742	0.150034
	7.9	11.7188	10.437					7.9	11.7188	10.437					7.9	0.161822	0.152786
	8	12.9191	9.92838					8	12.9191	9.92838					8	0.163146	0.149904
	8.1	13.0208	11.0067					8.1	13.0208	11.0067					8.1	0.164164	0.153516
	8.2	12.4919	11.1491					8.2	12.4919	11.1491					8.2	0.165863	0.153081
	8.3	12.3087	10.5387					8.3	12.3087	10.5387					8.3	0.163471	0.156533
	8.4	13.0005	10.7422					8.4	13.0005	10.7422					8.4	0.166962	0.157279
	8.5	13.2039	12.0443					8.5	13.2039	12.0443					8.5	0.167687	0.157496
	8.6	12.4919	11.5967					8.6	12.4919	11.5967					8.6	0.166604	0.152495
	8.7	12.9395	10.8236					8.7	12.9395	10.8236					8.7	0.169942	0.156795
	8.8	13.7736	11.5356					8.8	13.7736	11.5356					8.8	0.170252	0.158183
	8.9	12.3698	11.2712					8.9	12.3698	11.2712					8.9	0.170108	0.159553
	9	13.6312	10.5591					9	13.6312	10.5591					9	0.170622	0.155255
	9.1	12.6953	11.7594					9.1	12.6953	11.7594					9.1	0.171557	0.15711
	9.2	14.5467	12.2274					9.2	14.5467	12.2274					9.2	0.174898	0.163362
	9.3	13.7329	10.6201					9.3	13.7329	10.6201					9.3	0.174993	0.16007
	9.4	13.7532	10.6405					9.4	13.7532	10.6405					9.4	0.175059	0.163662
	9.5	13.265	11.1287					9.5	13.265	11.1287					9.5	0.174788	0.159296
	9.6	13.855	11.4543					9.6	13.855	11.4543					9.6	0.175128	0.163587
	9.7	13.2243	11.9222					9.7	13.2243	11.9222					9.7	0.176749	0.164296
	9.8	14.4653	11.8408					9.8	14.4653	11.8408					9.8	0.176059	0.162972
	9.9	13.3057	11.1084					9.9	13.3057	11.1084					9.9	0.178134	0.163699
	10	14.6688	10.5794					10	14.6688	10.5794					10	0.178023	0.166965
	10.1	13.7736	11.3932					10.1	13.7736	11.3932					10.1	0.178943	0.16372
	10.2	13.7736	9.46045					10.2	13.7736	9.46045					10.2	0.180968	0.164955
	10.3	13.387	11.1694					10.3	13.387	11.1694					10.3	0.18208	0.16655
	10.4	13.6312	11.9629					10.4	13.6312	11.9629					10.4	0.182319	0.168565
	10.5	13.0615	11.1084					10.5	13.0615	11.1084					10.5	0.183129	0.166125
	10.6	13.2243	12.5936					10.6	13.2243	12.5936					10.6	0.182946	0.173984
	10.7	13.5091	10.6608					10.7	13.5091	10.6608					10.7	0.185458	0.17117
	10.8	14.2415	11.5356					10.8	14.2415	11.5356					10.8	0.186052	0.169221
	10.9	13.9364	11.2305					10.9	13.9364	11.2305					10.9	0.186294	0.172982
	11	14.6688	12.146					11	14.6688	12.146					11	0.185832	0.174116
	11.1	14.7909	12.1663					11.1	14.7909	12.1663					11.1	0.186672	0.174169
	11.2	13.7939	11.0474					11.2	13.7939	11.0474					11.2	0.187462	0.171821
	11.3	14.1805	10.9456					11.3	14.1805	10.9456					11.3	0.187187	0.177265
	11.4	14.6281	12.2884					11.4	14.6281	12.2884					11.4	0.189499	0.172703
	11.5	13.7329	13.2243					11.5	13.7329	13.2243					11.5	0.190628	0.178212
	11.6	13.8346	12.0646					11.6	13.8346	12.0646					11.6	0.192034	0.177343
	11.7	14.8722	12.1257					11.7	14.8722	12.1257					11.7	0.192768	0.17723
	11.8	13.916	12.3494					11.8	13.916	12.3494					11.8	0.192832	0.177301
	11.9	14.5874	13.4277					11.9	14.5874	13.4277					11.9	0.195932	0.178543
	12	14.7298	12.1867					12	14.7298	12.1867					12	0.19623	0.176576
	12.1	14.7298	12.1053					12.1	14.7298	12.1053					12.1	0.194336	0.182084
	12.2	14.8926	12.1867					12.2	14.8926	12.1867					12.2	0.196933	0.180198
	12.3	14.9536	12.5936					12.3	14.9536	12.5936					12.3	0.195132	0.181043
	12.4	15.4419	11.617					12.4	15.4419	11.617					12.4	0.19982	0.182412
	12.5	15.035	12.1663					12.5	15.035	12.1663					12.5	0.19905	0.182511
	12.6	15.1367	11.3932					12.6	15.1367	11.3932					12.6	0.203349	0.18801
	12.7	14.506	12.0443					12.7	14.506	12.0443					12.7	0.201025	0.184116
	12.8	14.8112	12.5122					12.8	14.8112	12.5122					12.8	0.204141	0.185099
	12.9	15.7674	12.9191					12.9	15.7674	12.9191					12.9	0.203969	0.188411
	13	14.9129	12.797					13	14.9129	12.797					13	0.204943	0.184757
	13.1	15.2181	11.8001					13.1	15.2181	11.8001					13.1	0.202837	0.191476
	13.2	14.974	12.1257					13.2	14.974	12.1257					13.2	0.205734	0.186621
	13.3	14.8519	12.1663					13.3	14.8519	12.1663					13.3	0.204261	0.188223
	13.4	15.9302	13.5905					13.4	15.9302	13.5905					13.4	0.208443	0.192036
	13.5	15.2588	12.4919					13.5	15.2588	12.4919					13.5	0.206751	0.19089
	13.6	14.7705	11.2915					13.6	14.7705	11.2915					13.6	0.207483	0.194363
	13.7	15.5029	13.0615					13.7	15.5029	13.0615					13.7	0.207614	0.19491
	13.8	14.5874	11.9222					13.8	14.5874	11.9222					13.8	0.211159	0.194201
	13.9	15.9098	13.5701					13.9	15.9098	13.5701					13.9	0.211234	0.197333
	14	15.096	13.0208					14	15.096	13.0208					14	0.210996	0.198759
	14.1	15.7674	12.9801					14.1	15.7674	12.9801					14.1	0.211603	0.197016
	14.2	16.154	13.2446					14.2	16.154	13.2446					14.2	0.212014	0.194275
	14.3	15.0553	12.5326					14.3	15.0553	12.5326					14.3	0.214251	0.198683
	14.4	15.9912	13.7126					14.4	15.9912	13.7126					14.4	0.212272	0.194376
	14.5	15.1367	12.8988					14.5	15.1367	12.8988					14.5	0.216054	0.196277
	14.6	15.8285	13.5498					14.6	15.8285	13.5498					14.6	0.217235	0.196388
	14.7	14.3026	13.326					14.7	14.3026	13.326					14.7	0.218508	0.200642
	14.8	15.2791	13.3667					14.8	15.2791	13.3667					14.8	0.218234	0.202433
	14.9	15.1774	12.3698					14.9	15.1774	12.3698					14.9	0.220246	0.202815
	15	15.5843	13.2243					15	15.5843	13.2243					15	0.221309	0.202629
	15.1	14.506	13.4277					15.1	14.506	13.4277					15.1	0.220337	0.205808
	15.2	15.8488	14.9129					15.2	15.8488	14.9129					15.2	0.222615	0.204829
	15.3	15.8285	14.2415					15.3	15.8285	14.2415					15.3	0.222873	0.206718
	15.4	15.1164	13.5701					15.4	15.1164	13.5701					15.4	0.22286	0.203423
	15.5	16.215	13.5905					15.5	16.215	13.5905					15.5	0.223347	0.206066
	15.6	15.4215	14.1195					15.6	15.4215	14.1195					15.6	0.225857	0.206993
	15.7	16.3371	13.1429					15.7	16.3371	13.1429					15.7	0.228958	0.204407
	15.8	16.9474	14.5264					15.8	16.9474	14.5264					15.8	0.228501	0.208317
	15.9	16.5812	13.9974					15.9	16.5812	13.9974					15.9	0.228864	0.206706
	16	17.1102	13.7532					16	17.1102	13.7532					16	0.230791	0.207609
	16.1	16.5609	13.7126					16.1	16.5609	13.7126					16.1	0.23299	0.211953
	16.2	16.2354	14.2619					16.2	16.2354	14.2619					16.2	0.234568	0.214521
	16.3	16.3981	13.387					16.3	16.3981	13.387					16.3	0.234372	0.21384
	16.4	16.8864	13.4277					16.4	16.8864	13.4277					16.4	0.236171	0.217825
	16.5	16.1133	14.3026					16.5	16.1133	14.3026					16.5	0.235139	0.215369
	16.6	15.8488	14.7909					16.6	15.8488	14.7909					16.6	0.236823	0.215334
	16.7	16.5405	12.736					16.7	16.5405	12.736					16.7	0.237874	0.213831
	16.8	17.6595	14.445					16.8	17.6595	14.445					16.8	0.235952	0.216471
	16.9	15.9912	12.9598					16.9	15.9912	12.9598					16.9	0.24096	0.214979
	17	16.4795	13.7939					17	16.4795	13.7939					17	0.241679	0.221067
	17.1	16.6016	14.3026					17.1	16.6016	14.3026					17.1	0.241767	0.22255
	17.2	16.3981	14.5874					17.2	16.3981	14.5874					17.2	0.242045	0.219159
	17.3	15.8488	13.8143					17.3	15.8488	13.8143					17.3	0.244258	0.221816
	17.4	15.6453	14.974					17.4	15.6453	14.974					17.4	0.242733	0.226193
	17.5	16.276	14.8722					17.5	16.276	14.8722					17.5	0.244025	0.22293
	17.6	16.5405	14.4246					17.6	16.5405	14.4246					17.6	0.242961	0.224286
	17.7	16.6219	14.0381					17.7	16.6219	14.0381					17.7	0.244235	0.226319
	17.8	16.9271	14.7298					17.8	16.9271	14.7298					17.8	0.247027	0.22419
	17.9	16.5405	14.4246					17.9	16.5405	14.4246					17.9	0.24511	0.224969
	18	16.4795	15.035					18	16.4795	15.035					18	0.247219	0.22483
	18.1	17.7002	13.9567					18.1	17.7002	13.9567					18.1	0.248825	0.228775
	18.2	17.2526	13.9771					18.2	17.2526	13.9771					18.2	0.249965	0.231718
	18.3	16.5202	14.384					18.3	16.5202	14.384					18.3	0.250275	0.229198
	18.4	17.334	15.6046					18.4	17.334	15.6046					18.4	0.253081	0.233784
	18.5	16.1133	13.8957					18.5	16.1133	13.8957					18.5	0.250847	0.228679
	18.6	17.5985	16.0726					18.6	17.5985	16.0726					18.6	0.255858	0.230671
	18.7	17.5171	14.8722					18.7	17.5171	14.8722					18.7	0.255509	0.232311
	18.8	16.4998	14.2008					18.8	16.4998	14.2008					18.8	0.257604	0.231474
	18.9	16.7643	14.7705					18.9	16.7643	14.7705					18.9	0.256678	0.235916
	19	17.6392	15.8488					19	17.6392	15.8488					19	0.25766	0.232905
	19.1	17.5374	13.9974					19.1	17.5374	13.9974					19.1	0.258646	0.231876
	19.2	17.3543	13.9364					19.2	17.3543	13.9364					19.2	0.259417	0.234681
	19.3	17.6798	15.035					19.3	17.6798	15.035					19.3	0.260396	0.241394
	19.4	17.0085	15.5029					19.4	17.0085	15.5029					19.4	0.261304	0.239414
	19.5	18.1274	13.9771					19.5	18.1274	13.9771					19.5	0.264428	0.241586
	19.6	17.3543	15.8081					19.6	17.3543	15.8081					19.6	0.266415	0.247253
	19.7	18.3105	15.4419					19.7	18.3105	15.4419					19.7	0.265551	0.247363
	19.8	18.7581	14.9129					19.8	18.7581	14.9129					19.8	0.264108	0.242737
	19.9	17.8833	15.4215					19.9	17.8833	15.4215					19.9	0.268729	0.239684
	20	18.6564	14.7095					20	18.6564	14.7095					20	0.267463	0.242865
	20.1	18.8802	14.4653					20.1	18.8802	14.4653					20.1	0.267443	0.242566
	20.2	17.8833	14.0788					20.2	17.8833	14.0788					20.2	0.270155	0.24093
	20.3	18.7174	14.0584					20.3	18.7174	14.0584					20.3	0.271976	0.245076
	20.4	18.9005	14.1602					20.4	18.9005	14.1602					20.4	0.267633	0.244081
	20.5	17.4764	15.035					20.5	17.4764	15.035					20.5	0.272896	0.251757
	20.6	18.3512	15.1571					20.6	18.3512	15.1571					20.6	0.272969	0.252118
	20.7	17.6595	16.3167					20.7	17.6595	16.3167					20.7	0.274527	0.248785
	20.8	17.7816	14.506					20.8	17.7816	14.506					20.8	0.273932	0.252875
	20.9	17.3543	15.5436					20.9	17.3543	15.5436					20.9	0.274848	0.247885
	21	18.0664	15.3198					21	18.0664	15.3198					21	0.277471	0.246821
	21.1	18.3716	15.1774					21.1	18.3716	15.1774					21.1	0.276833	0.250525
	21.2	18.5547	15.4622					21.2	18.5547	15.4622					21.2	0.275146	0.251565
	21.3	18.6768	15.096					21.3	18.6768	15.096					21.3	0.277357	0.254133
	21.4	18.8192	15.1571					21.4	18.8192	15.1571					21.4	0.278961	0.252716
	21.5	18.2088	16.1336					21.5	18.2088	16.1336					21.5	0.280381	0.257136
	21.6	18.8802	15.4012					21.6	18.8802	15.4012					21.6	0.281622	0.261731
	21.7	17.985	17.1712					21.7	17.985	17.1712					21.7	0.281186	0.259454
	21.8	17.6798	16.805					21.8	17.6798	16.805					21.8	0.284586	0.258026
	21.9	18.9616	16.6219					21.9	18.9616	16.6219					21.9	0.28794	0.26088
	22	18.8192	16.5405					22	18.8192	16.5405					22	0.284973	0.260255
	22.1	18.6971	16.3371					22.1	18.6971	16.3371					22.1	0.287713	0.257395
	22.2	18.9209	17.0288					22.2	18.9209	17.0288					22.2	0.287113	0.261358
	22.3	17.3747	15.9302					22.3	17.3747	15.9302					22.3	0.289607	0.261241
	22.4	18.7174	16.3167					22.4	18.7174	16.3167					22.4	0.290881	0.259459
	22.5	19.0633	16.6423					22.5	19.0633	16.6423					22.5	0.289447	0.259419
	22.6	19.0023	15.9505					22.6	19.0023	15.9505					22.6	0.290249	0.26
	22.7	18.8802	17.1305					22.7	18.8802	17.1305					22.7	0.291867	0.26769
	22.8	19.7143	15.6657					22.8	19.7143	15.6657					22.8	0.295559	0.268946
	22.9	19.104	17.273					22.9	19.104	17.273					22.9	0.295602	0.265978
	23	19.4702	16.8254					23	19.4702	16.8254					23	0.297626	0.270628
	23.1	19.4295	16.276					23.1	19.4295	16.276					23.1	0.298015	0.268772
	23.2	19.7143	15.7674					23.2	19.7143	15.7674					23.2	0.297195	0.27056
	23.3	20.2026	16.4998					23.3	20.2026	16.4998					23.3	0.300938	0.267474
	23.4	20.2637	17.395					23.4	20.2637	17.395					23.4	0.301087	0.267466
	23.5	19.9178	15.1164					23.5	19.9178	15.1164					23.5	0.301745	0.26999
	23.6	20.1009	16.1133					23.6	20.1009	16.1133					23.6	0.299394	0.274289
	23.7	19.8364	16.3167					23.7	19.8364	16.3167					23.7	0.30266	0.275317
	23.8	20.1416	15.9098					23.8	20.1416	15.9098					23.8	0.303384	0.278729
	23.9	20.223	16.5812					23.9	20.223	16.5812					23.9	0.302765	0.276628
	24	20.4061	17.395					24	20.4061	17.395					24	0.306774	0.276699
	24.1	19.9178	17.6188					24.1	19.9178	17.6188					24.1	0.307314	0.281353
	24.2	19.694	18.0461					24.2	19.694	18.0461					24.2	0.310046	0.280197
	24.3	19.5312	17.2933					24.3	19.5312	17.2933					24.3	0.308287	0.276514
	24.4	19.9178	16.8254					24.4	19.9178	16.8254					24.4	0.309865	0.279914
	24.5	19.5516	18.1885					24.5	19.5516	18.1885					24.5	0.309939	0.283825
	24.6	20.223	17.0085					24.6	20.223	17.0085					24.6	0.311301	0.281703
	24.7	18.9005	17.4967					24.7	18.9005	17.4967					24.7	0.310073	0.280342
	24.8	19.694	16.9067					24.8	19.694	16.9067					24.8	0.315714	0.285469
	24.9	19.633	17.2119					24.9	19.633	17.2119					24.9	0.31577	0.282938
	25	20.0195	17.8019					25	20.0195	17.8019					25	0.31573	0.286215
	25.1	20.6299	17.4154					25.1	20.6299	17.4154					25.1	0.317305	0.289326
	25.2	20.1416	17.4967					25.2	20.1416	17.4967					25.2	0.315001	0.287283
	25.3	20.9758	18.1071					25.3	20.9758	18.1071					25.3	0.318329	0.291228
	25.4	21.1182	17.5374					25.4	21.1182	17.5374					25.4	0.319469	0.2887
	25.5	20.6095	17.0492					25.5	20.6095	17.0492					25.5	0.321919	0.286819
	25.6	20.4264	18.2088					25.6	20.4264	18.2088					25.6	0.320977	0.294371
	25.7	19.6737	18.2902					25.7	19.6737	18.2902					25.7	0.321787	0.294634
	25.8	21.0571	17.0898					25.8	21.0571	17.0898					25.8	0.324891	0.295862
	25.9	21.403	18.1274					25.9	21.403	18.1274					25.9	0.32536	0.295338
	26	20.7723	18.1274					26	20.7723	18.1274					26	0.326347	0.296575
	26.1	21.2199	17.1509					26.1	21.2199	17.1509					26.1	0.326563	0.297586
	26.2	21.5251	17.7409					26.2	21.5251	17.7409					26.2	0.331298	0.297708
	26.3	21.7285	18.2292					26.3	21.7285	18.2292					26.3	0.328368	0.298065
	26.4	21.2606	17.9443					26.4	21.2606	17.9443					26.4	0.331185	0.300361
	26.5	22.054	17.4154					26.5	22.054	17.4154					26.5	0.330901	0.301146
	26.6	21.0775	17.4967					26.6	21.0775	17.4967					26.6	0.335918	0.299354
	26.7	20.0399	17.7205					26.7	20.0399	17.7205					26.7	0.333453	0.305348
	26.8	21.342	17.3136					26.8	21.342	17.3136					26.8	0.334765	0.297996
	26.9	21.0775	17.9036					26.9	21.0775	17.9036					26.9	0.335988	0.304162
	27	20.1212	17.2323					27	20.1212	17.2323					27	0.331518	0.301858
	27.1	20.6095	18.4936					27.1	20.6095	18.4936					27.1	0.338599	0.30875
	27.2	21.4233	17.0492					27.2	21.4233	17.0492					27.2	0.339121	0.304994
	27.3	22.2778	18.9412					27.3	22.2778	18.9412					27.3	0.338493	0.304112
	27.4	21.0164	19.2261					27.4	21.0164	19.2261					27.4	0.339679	0.310865
	27.5	21.0571	19.1243					27.5	21.0571	19.1243					27.5	0.339353	0.307606
	27.6	20.9351	19.4295					27.6	20.9351	19.4295					27.6	0.341713	0.308733
	27.7	21.1182	18.3512					27.7	21.1182	18.3512					27.7	0.344493	0.310873
	27.8	21.4437	18.453					27.8	21.4437	18.453					27.8	0.339127	0.311609
	27.9	21.1792	18.4936					27.9	21.1792	18.4936					27.9	0.344309	0.308203
	28	21.1385	18.6361					28	21.1385	18.6361					28	0.344981	0.317386
	28.1	21.0368	18.6768					28.1	21.0368	18.6768					28.1	0.349082	0.316896
	28.2	21.2809	18.7988					28.2	21.2809	18.7988					28.2	0.349943	0.318158
	28.3	21.6471	20.0806					28.3	21.6471	20.0806					28.3	0.348495	0.316497
	28.4	20.8333	19.0837					28.4	20.8333	19.0837					28.4	0.352021	0.32558
	28.5	21.4233	20.223					28.5	21.4233	20.223					28.5	0.350876	0.314353
	28.6	21.6268	20.1823					28.6	21.6268	20.1823					28.6	0.348815	0.325417
	28.7	21.7895	19.2057					28.7	21.7895	19.2057					28.7	0.354883	0.318823
	28.8	21.7489	19.104					28.8	21.7489	19.104					28.8	0.353817	0.319191
	28.9	21.5454	19.7143					28.9	21.5454	19.7143					28.9	0.353801	0.326571
	29	22.2778	19.755					29	22.2778	19.755					29	0.356331	0.323406
	29.1	21.7692	18.7581					29.1	21.7692	18.7581					29.1	0.356667	0.326308
	29.2	21.8913	19.5719					29.2	21.8913	19.5719					29.2	0.359902	0.325867
	29.3	22.4813	19.3481					29.3	22.4813	19.3481					29.3	0.35947	0.32761
	29.4	23.0102	20.0195					29.4	23.0102	20.0195					29.4	0.361893	0.327832
	29.5	23.5596	20.5485					29.5	23.5596	20.5485					29.5	0.359607	0.330964
	29.6	23.4985	18.9412					29.6	23.4985	18.9412					29.6	0.363874	0.329184
	29.7	22.7865	20.1416					29.7	22.7865	20.1416					29.7	0.360023	0.327537
	29.8	23.2951	18.575					29.8	23.2951	18.575					29.8	0.361272	0.329283
	29.9	23.5596	19.3685					29.9	23.5596	19.3685					29.9	0.364764	0.3277
	30	21.8913	18.9209					30	21.8913	18.9209					30	0.363646	0.334968
	30.1	22.0947	19.5312					30.1	22.0947	19.5312					30.1	0.366635	0.332369
	30.2	22.9696	19.2261					30.2	22.9696	19.2261					30.2	0.364817	0.334499
	30.3	22.6847	19.8568					30.3	22.6847	19.8568					30.3	0.368158	0.337837
	30.4	22.1964	19.6737					30.4	22.1964	19.6737					30.4	0.367477	0.332008
	30.5	23.3561	20.6909					30.5	23.3561	20.6909					30.5	0.370711	0.334982
	30.6	23.0916	19.9585					30.6	23.0916	19.9585					30.6	0.371655	0.337759
	30.7	22.8475	19.4295					30.7	22.8475	19.4295					30.7	0.371853	0.341215
	30.8	22.7051	21.1182					30.8	22.7051	21.1182					30.8	0.376227	0.337159
	30.9	22.6644	20.3044					30.9	22.6644	20.3044					30.9	0.373564	0.341425
	31	22.9085	20.5282					31	22.9085	20.5282					31	0.375167	0.3406
	31.1	22.5016	20.9554					31.1	22.5016	20.9554					31.1	0.376277	0.343062
	31.2	23.8647	20.6299					31.2	23.8647	20.6299					31.2	0.377433	0.347748
	31.3	22.3795	20.874					31.3	22.3795	20.874					31.3	0.378826	0.348793
	31.4	22.3185	20.752					31.4	22.3185	20.752					31.4	0.377679	0.351084
	31.5	21.8913	20.6299					31.5	21.8913	20.6299					31.5	0.383494	0.352667
	31.6	23.3154	20.5485					31.6	23.3154	20.5485					31.6	0.384375	0.352456
	31.7	23.9461	20.7723					31.7	23.9461	20.7723					31.7	0.386324	0.349547
	31.8	23.2137	20.4061					31.8	23.2137	20.4061					31.8	0.38442	0.351355
	31.9	23.9054	22.2168					31.9	23.9054	22.2168					31.9	0.386651	0.352416
	32	23.9461	21.9727					32	23.9461	21.9727					32	0.38968	0.355987
	32.1	24.3327	21.403					32.1	24.3327	21.403					32.1	0.385844	0.35222
	32.2	23.641	20.5485					32.2	23.641	20.5485					32.2	0.391696	0.356125
	32.3	23.0916	20.3247					32.3	23.0916	20.3247					32.3	0.391208	0.352197
	32.4	24.8006	20.9147					32.4	24.8006	20.9147					32.4	0.396385	0.353623
	32.5	23.8444	19.7143					32.5	23.8444	19.7143					32.5	0.395775	0.357559
	32.6	25.0448	22.1151					32.6	25.0448	22.1151					32.6	0.394697	0.356092
	32.7	23.9868	20.752					32.7	23.9868	20.752					32.7	0.397913	0.360665
	32.8	23.9868	20.9351					32.8	23.9868	20.9351					32.8	0.397276	0.359864
	32.9	24.4141	21.993					32.9	24.4141	21.993					32.9	0.399453	0.365445
	33	24.0275	21.1182					33	24.0275	21.1182					33	0.402873	0.362363
	33.1	25.1058	21.4437					33.1	25.1058	21.4437					33.1	0.40555	0.37034
	33.2	25.1668	21.0775					33.2	25.1668	21.0775					33.2	0.404196	0.36175
	33.3	24.4344	20.0399					33.3	24.4344	20.0399					33.3	0.401741	0.36631
	33.4	24.5972	21.8302					33.4	24.5972	21.8302					33.4	0.40645	0.368444
	33.5	24.6379	20.7113					33.5	24.6379	20.7113					33.5	0.407284	0.363986
	33.6	24.7192	21.3216					33.6	24.7192	21.3216					33.6	0.405354	0.369044
	33.7	23.9258	21.0775					33.7	23.9258	21.0775					33.7	0.409049	0.372737
	33.8	24.2513	21.7285					33.8	24.2513	21.7285					33.8	0.408923	0.370993
	33.9	24.4751	22.1151					33.9	24.4751	22.1151					33.9	0.411319	0.373931
	34	23.8037	22.6033					34	23.8037	22.6033					34	0.410468	0.37262
	34.1	25.3092	21.7285					34.1	25.3092	21.7285					34.1	0.416313	0.373649
	34.2	23.3765	23.3154					34.2	23.3765	23.3154					34.2	0.414158	0.372632
	34.3	24.882	21.6878					34.3	24.882	21.6878					34.3	0.416382	0.371147
	34.4	25.8586	22.7458					34.4	25.8586	22.7458					34.4	0.417663	0.371662
	34.5	24.6379	22.054					34.5	24.6379	22.054					34.5	0.421693	0.376603
	34.6	24.5361	21.9116					34.6	24.5361	21.9116					34.6	0.419332	0.377079
	34.7	25.6551	21.403					34.7	25.6551	21.403					34.7	0.418639	0.379969
	34.8	25.3499	22.4609					34.8	25.3499	22.4609					34.8	0.419762	0.381373
	34.9	24.1903	22.8882					34.9	24.1903	22.8882					34.9	0.423731	0.380428
	35	24.7803	23.3765					35	24.7803	23.3765					35	0.419048	0.377834
	35.1	24.6989	22.1964					35.1	24.6989	22.1964					35.1	0.42302	0.381819
	35.2	24.1699	22.644					35.2	24.1699	22.644					35.2	0.421775	0.38143
	35.3	25.0855	23.112					35.3	25.0855	23.112					35.3	0.430081	0.381217
	35.4	24.6582	23.4171					35.4	24.6582	23.4171					35.4	0.426642	0.383654
	35.5	25.3703	22.644					35.5	25.3703	22.644					35.5	0.427659	0.384419
	35.6	25.6551	22.4813					35.6	25.6551	22.4813					35.6	0.435284	0.391446
	35.7	26.0417	23.1527					35.7	26.0417	23.1527					35.7	0.432418	0.39412
	35.8	24.9634	23.2747					35.8	24.9634	23.2747					35.8	0.435578	0.393535
	35.9	25.0448	22.4406					35.9	25.0448	22.4406					35.9	0.436478	0.393695
	36	25.4923	23.0102					36	25.4923	23.0102					36	0.436737	0.395821
	36.1	24.9227	22.583					36.1	24.9227	22.583					36.1	0.434991	0.39722
	36.2	26.3265	22.9696					36.2	26.3265	22.9696					36.2	0.443375	0.399315
	36.3	25.533	23.8851					36.3	25.533	23.8851					36.3	0.446305	0.400373
	36.4	26.1434	22.1354					36.4	26.1434	22.1354					36.4	0.442191	0.399566
	36.5	26.0417	22.8882					36.5	26.0417	22.8882					36.5	0.443253	0.393454
	36.6	26.6317	22.7051					36.6	26.6317	22.7051					36.6	0.44204	0.401878
	36.7	25.0855	23.3561					36.7	25.0855	23.3561					36.7	0.444677	0.396088
	36.8	25.3499	22.9289					36.8	25.3499	22.9289					36.8	0.442151	0.39665
	36.9	24.943	22.8678					36.9	24.943	22.8678					36.9	0.444917	0.399841
	37	26.4689	22.4406					37	26.4689	22.4406					37	0.445665	0.403998
	37.1	26.4282	23.4985					37.1	26.4282	23.4985					37.1	0.449447	0.399819
	37.2	26.2044	22.9289					37.2	26.2044	22.9289					37.2	0.449358	0.402274
	37.3	25.6551	23.2544					37.3	25.6551	23.2544					37.3	0.452024	0.402431
	37.4	26.1027	23.8647					37.4	26.1027	23.8647					37.4	0.451535	0.40443
	37.5	24.2716	23.702					37.5	24.2716	23.702					37.5	0.456613	0.404067
	37.6	25.9603	23.9258					37.6	25.9603	23.9258					37.6	0.455597	0.404056
	37.7	27.1199	23.763					37.7	27.1199	23.763					37.7	0.452626	0.408703
	37.8	26.6113	22.9899					37.8	26.6113	22.9899					37.8	0.453702	0.406588
	37.9	25.6958	24.1699					37.9	25.6958	24.1699					37.9	0.456237	0.406895
	38	26.8148	22.7458					38	26.8148	22.7458					38	0.462282	0.412937
	38.1	26.2655	22.8678					38.1	26.2655	22.8678					38.1	0.45903	0.40874
	38.2	26.4282	24.0885					38.2	26.4282	24.0885					38.2	0.462561	0.416602
	38.3	26.2451	23.0102					38.3	26.2451	23.0102					38.3	0.461656	0.410851
	38.4	26.123	24.6989					38.4	26.123	24.6989					38.4	0.463048	0.416782
	38.5	26.8148	24.7396					38.5	26.8148	24.7396					38.5	0.467261	0.416532
	38.6	25.8789	24.9634					38.6	25.8789	24.9634					38.6	0.4667	0.415763
	38.7	27.2624	23.8851					38.7	27.2624	23.8851					38.7	0.468244	0.416067
	38.8	26.4893	24.4751					38.8	26.4893	24.4751					38.8	0.471667	0.415824
	38.9	26.7537	22.6237					38.9	26.7537	22.6237					38.9	0.472317	0.41663
	39	28.3203	25.1058					39	28.3203	25.1058					39	0.474135	0.422772
	39.1	27.4658	24.1496					39.1	27.4658	24.1496					39.1	0.478929	0.425669
	39.2	27.0589	24.4344					39.2	27.0589	24.4344					39.2	0.477256	0.42771
	39.3	27.771	24.943					39.3	27.771	24.943					39.3	0.478344	0.426761
	39.4	27.9948	24.4344					39.4	27.9948	24.4344					39.4	0.47935	0.430231
	39.5	26.9572	24.6582					39.5	26.9572	24.6582					39.5	0.479649	0.435486
	39.6	27.2013	25.2686					39.6	27.2013	25.2686					39.6	0.47664	0.426665
	39.7	26.9165	24.7599					39.7	26.9165	24.7599					39.7	0.477776	0.427727
	39.8	27.9948	25.0041					39.8	27.9948	25.0041					39.8	0.478669	0.428508
	39.9	26.652	24.7599					39.9	26.652	24.7599					39.9	0.481155	0.427736
	40	26.6317	23.9258					40	26.6317	23.9258					40	0.482335	0.428609
	40.1	27.5879	24.353					40.1	27.5879	24.353					40.1	0.480019	0.432095
	40.2	27.5472	24.3327					40.2	27.5472	24.3327					40.2	0.484264	0.433265
	40.3	27.6693	25.0448					40.3	27.6693	25.0448					40.3	0.484637	0.436635
	40.4	27.8117	24.2716					40.4	27.8117	24.2716					40.4	0.488499	0.439541
	40.5	27.242	25.0855					40.5	27.242	25.0855					40.5	0.490006	0.43894
	40.6	27.3031	24.7599					40.6	27.3031	24.7599					40.6	0.490261	0.437927
	40.7	27.71	25.1058					40.7	27.71	25.1058					40.7	0.493117	0.440299
	40.8	26.9165	25.7161					40.8	26.9165	25.7161					40.8	0.490626	0.440832
	40.9	27.7913	24.9634					40.9	27.7913	24.9634					40.9	0.496011	0.444852
	41	27.8931	25.4923					41	27.8931	25.4923					41	0.497718	0.445008
	41.1	26.9775	25.6958					41.1	26.9775	25.6958					41.1	0.498391	0.440776
	41.2	28.6662	25.5534					41.2	28.6662	25.5534					41.2	0.494577	0.441698
	41.3	27.6693	25.6755					41.3	27.6693	25.6755					41.3	0.496422	0.445871
	41.4	28.0558	26.1434					41.4	28.0558	26.1434					41.4	0.502924	0.44685
	41.5	28.1779	25.7161					41.5	28.1779	25.7161					41.5	0.505579	0.452946
	41.6	28.2796	26.591					41.6	28.2796	26.591					41.6	0.503912	0.452173
	41.7	28.0965	26.3875					41.7	28.0965	26.3875					41.7	0.508379	0.453604
	41.8	28.9917	26.6113					41.8	28.9917	26.6113					41.8	0.505792	0.461809
	41.9	28.6865	28.1372					41.9	28.6865	28.1372					41.9	0.504458	0.457564
	42	29.0934	26.2655					42	29.0934	26.2655					42	0.508004	0.455595
	42.1	29.2765	26.1637					42.1	29.2765	26.1637					42.1	0.512287	0.460244
	42.2	27.6693	25.5737					42.2	27.6693	25.5737					42.2	0.509668	0.456177
	42.3	28.951	26.5706					42.3	28.951	26.5706					42.3	0.511276	0.45796
	42.4	28.4627	26.0417					42.4	28.4627	26.0417					42.4	0.512642	0.456133
	42.5	28.7679	26.4486					42.5	28.7679	26.4486					42.5	0.512965	0.458262
	42.6	27.9948	26.4689					42.6	27.9948	26.4689					42.6	0.515179	0.464023
	42.7	29.012	25.7365					42.7	29.012	25.7365					42.7	0.515336	0.468339
	42.8	28.0762	26.1434					42.8	28.0762	26.1434					42.8	0.51503	0.470552
	42.9	29.012	27.0996					42.9	29.012	27.0996					42.9	0.519812	0.468776
	43	29.2765	26.4282					43	29.2765	26.4282					43	0.523307	0.46641
	43.1	28.7069	26.4079					43.1	28.7069	26.4079					43.1	0.522315	0.469873
	43.2	29.9886	26.2451					43.2	29.9886	26.2451					43.2	0.526374	0.471005
	43.3	29.3172	26.5096					43.3	29.3172	26.5096					43.3	0.529762	0.469594
	43.4	30.0293	26.3061					43.4	30.0293	26.3061					43.4	0.5296	0.471015
	43.5	29.9072	26.6724					43.5	29.9072	26.6724					43.5	0.524199	0.47556
	43.6	29.2358	26.4282					43.6	29.2358	26.4282					43.6	0.528021	0.474207
	43.7	29.3579	26.5706					43.7	29.3579	26.5706					43.7	0.531496	0.47291
	43.8	27.5472	26.9165					43.8	27.5472	26.9165					43.8	0.533897	0.478292
	43.9	29.4189	27.5879					43.9	29.4189	27.5879					43.9	0.533627	0.473303
	44	29.1341	27.71					44	29.1341	27.71					44	0.53372	0.47603
	44.1	29.0934	27.2827					44.1	29.0934	27.2827					44.1	0.533392	0.480166
	44.2	29.3783	27.9744					44.2	29.3783	27.9744					44.2	0.534883	0.48134
	44.3	29.9072	27.5879					44.3	29.9072	27.5879					44.3	0.537679	0.483115
	44.4	30.1717	26.8555					44.4	30.1717	26.8555					44.4	0.537699	0.481214
	44.5	28.9714	28.1982					44.5	28.9714	28.1982					44.5	0.541031	0.483903
	44.6	29.2358	27.1199					44.6	29.2358	27.1199					44.6	0.541044	0.487824
	44.7	29.5003	27.7507					44.7	29.5003	27.7507					44.7	0.544784	0.489708
	44.8	29.48	27.6286					44.8	29.48	27.6286					44.8	0.541847	0.489197
	44.9	29.9683	28.422					44.9	29.9683	28.422					44.9	0.538992	0.489837
	45	29.7445	28.2593					45	29.7445	28.2593					45	0.545654	0.489702
	45.1	29.1952	29.7445					45.1	29.1952	29.7445					45.1	0.547285	0.490354
	45.2	30.0293	28.9714					45.2	30.0293	28.9714					45.2	0.544828	0.493641
	45.3	29.5003	28.1169					45.3	29.5003	28.1169					45.3	0.552217	0.494281
	45.4	30.8024	28.89					45.4	30.8024	28.89					45.4	0.556947	0.495186
	45.5	29.3783	28.9307					45.5	29.3783	28.9307					45.5	0.555074	0.497057
	45.6	30.1514	28.1779					45.6	30.1514	28.1779					45.6	0.554423	0.492255
	45.7	31.1279	28.5645					45.7	31.1279	28.5645					45.7	0.55701	0.493465
	45.8	30.3548	28.2186					45.8	30.3548	28.2186					45.8	0.563227	0.496112
	45.9	30.2124	28.0558					45.9	30.2124	28.0558					45.9	0.56286	0.501093
	46	30.3345	28.6458					46	30.3345	28.6458					46	0.56318	0.501066
	46.1	30.3345	28.7476					46.1	30.3345	28.7476					46.1	0.560963	0.501654
	46.2	31.2907	29.5003					46.2	31.2907	29.5003					46.2	0.565277	0.509574
	46.3	31.1076	29.541					46.3	31.1076	29.541					46.3	0.566125	0.511501
	46.4	31.9417	29.7445					46.4	31.9417	29.7445					46.4	0.56413	0.510323
	46.5	32.1859	29.4393					46.5	32.1859	29.4393					46.5	0.56681	0.511244
	46.6	31.4535	27.9134					46.6	31.4535	27.9134					46.6	0.571675	0.51017
	46.7	29.9072	30.1107					46.7	29.9072	30.1107					46.7	0.571977	0.506849
	46.8	31.1686	29.3376					46.8	31.1686	29.3376					46.8	0.571548	0.509388
	46.9	31.189	29.2155					46.9	31.189	29.2155					46.9	0.570212	0.513804
	47	31.4738	28.8086					47	31.4738	28.8086					47	0.574045	0.515855
	47.1	31.6365	29.541					47.1	31.6365	29.541					47.1	0.574504	0.52017
	47.2	31.25	28.422					47.2	31.25	28.422					47.2	0.576868	0.517553
	47.3	31.6569	30.0496					47.3	31.6569	30.0496					47.3	0.575062	0.518682
	47.4	31.9214	28.951					47.4	31.9214	28.951					47.4	0.581893	0.522192
	47.5	32.4504	29.4189					47.5	32.4504	29.4189					47.5	0.583073	0.524708
	47.6	30.8838	30.8838					47.6	30.8838	30.8838					47.6	0.582952	0.524112
	47.7	33.1624	30.2938					47.7	33.1624	30.2938					47.7	0.584138	0.521096
	47.8	31.779	30.5786					47.8	31.779	30.5786					47.8	0.584019	0.528374
	47.9	32.4097	29.9886					47.9	32.4097	29.9886					47.9	0.58456	0.523429
	48	32.43	31.1076					48	32.43	31.1076					48	0.586314	0.524148
	48.1	32.5724	30.9448					48.1	32.5724	30.9448					48.1	0.589773	0.53144
	48.2	33.0404	29.3579					48.2	33.0404	29.3579					48.2	0.593283	0.533742
	48.3	32.0028	31.311					48.3	32.0028	31.311					48.3	0.592521	0.535891
	48.4	32.7352	31.25					48.4	32.7352	31.25					48.4	0.593641	0.533799
	48.5	31.4941	31.6365					48.5	31.4941	31.6365					48.5	0.594685	0.535786
	48.6	32.6945	30.8838					48.6	32.6945	30.8838					48.6	0.599765	0.536718
	48.7	31.9824	30.721					48.7	31.9824	30.721					48.7	0.600201	0.542825
	48.8	31.311	31.0872					48.8	31.311	31.0872					48.8	0.598403	0.533783
	48.9	32.8369	29.2562					48.9	32.8369	29.2562					48.9	0.598966	0.538135
	49	31.779	30.2938					49	31.779	30.2938					49	0.601025	0.538785
	49.1	31.7993	29.6427					49.1	31.7993	29.6427					49.1	0.601769	0.540097
	49.2	33.1421	29.6631					49.2	33.1421	29.6631					49.2	0.603698	0.542095
	49.3	33.2845	30.9245					49.3	33.2845	30.9245					49.3	0.604841	0.545547
	49.4	32.4707	30.0903					49.4	32.4707	30.0903					49.4	0.604553	0.543167
	49.5	32.898	31.4535					49.5	32.898	31.4535					49.5	0.610536	0.544698
	49.6	33.1217	31.0059					49.6	33.1217	31.0059					49.6	0.612721	0.548583
	49.7	32.5317	31.84					49.7	32.5317	31.84					49.7	0.613448	0.540069
	49.8	32.6335	32.0638					49.8	32.6335	32.0638					49.8	0.614499	0.544439
	49.9	33.7524	29.5817					49.9	33.7524	29.5817					49.9	0.614618	0.548739
	50	33.3455	30.6803					50	33.3455	30.6803					50	0.620019	0.55458
	50.1	34.1187	30.5176					50.1	34.1187	30.5176					50.1	0.619895	0.557561
	50.2	33.081	31.0669					50.2	33.081	31.0669					50.2	0.617635	0.558995
	50.3	34.078	30.131					50.3	34.078	30.131					50.3	0.619884	0.558047
	50.4	33.0607	31.7993					50.4	33.0607	31.7993					50.4	0.622125	0.559576
	50.5	34.3424	31.6976					50.5	34.3424	31.6976					50.5	0.619415	0.562109
	50.6	33.1014	31.2907					50.6	33.1014	31.2907					50.6	0.622592	0.558309
	50.7	33.61	31.3517					50.7	33.61	31.3517					50.7	0.626709	0.557364
	50.8	32.6945	32.4097					50.8	32.6945	32.4097					50.8	0.625557	0.560044
	50.9	34.1797	30.9245					50.9	34.1797	30.9245					50.9	0.628318	0.559696
	51	33.5083	31.9417					51	33.5083	31.9417					51	0.624887	0.565878
	51.1	32.7352	30.7007					51.1	32.7352	30.7007					51.1	0.625585	0.56678
	51.2	34.668	30.8024					51.2	34.668	30.8024					51.2	0.632441	0.566055
	51.3	35.0342	31.2296					51.3	35.0342	31.2296					51.3	0.632072	0.565522
	51.4	33.8745	31.779					51.4	33.8745	31.779					51.4	0.627367	0.569354
	51.5	33.6914	32.2876					51.5	33.6914	32.2876					51.5	0.632381	0.572105
	51.6	34.668	33.5897					51.6	34.668	33.5897					51.6	0.634926	0.576807
	51.7	33.2031	32.43					51.7	33.2031	32.43					51.7	0.634907	0.576606
	51.8	34.3424	33.61					51.8	34.3424	33.61					51.8	0.633553	0.577955
	51.9	34.668	33.2642					51.9	34.668	33.2642					51.9	0.635002	0.579053
	52	34.668	32.3893					52	34.668	32.3893					52	0.637002	0.581257
	52.1	34.1187	33.2235					52.1	34.1187	33.2235					52.1	0.641656	0.583298
	52.2	35.4004	33.5693					52.2	35.4004	33.5693					52.2	0.642223	0.582662
	52.3	34.4238	32.7555					52.3	34.4238	32.7555					52.3	0.644143	0.583712
	52.4	35.2987	34.0373					52.4	35.2987	34.0373					52.4	0.646469	0.579901
	52.5	35.5225	32.6741					52.5	35.5225	32.6741					52.5	0.641233	0.579933
	52.6	36.1328	33.6507					52.6	36.1328	33.6507					52.6	0.643204	0.591833
	52.7	34.7493	33.4473					52.7	34.7493	33.4473					52.7	0.646219	0.5795
	52.8	36.1735	33.2438					52.8	36.1735	33.2438					52.8	0.648339	0.589219
	52.9	36.1938	33.081					52.9	36.1938	33.081					52.9	0.651333	0.597586
	53	35.4818	33.9152					53	35.4818	33.9152					53	0.651033	0.587306
	53.1	36.2345	32.5724					53.1	36.2345	32.5724					53.1	0.649766	0.590237
	53.2	35.9497	32.3079					53.2	35.9497	32.3079					53.2	0.654863	0.588357
	53.3	35.909	34.0983					53.3	35.909	34.0983					53.3	0.654107	0.589196
	53.4	35.9497	32.0841					53.4	35.9497	32.0841					53.4	0.654757	0.589096
	53.5	35.0545	32.5521					53.5	35.0545	32.5521					53.5	0.653282	0.597863
	53.6	36.2549	32.5114					53.6	36.2549	32.5114					53.6	0.654896	0.596559
	53.7	36.0921	34.4849					53.7	36.0921	34.4849					53.7	0.658501	0.602321
	53.8	37.3128	33.8338					53.8	37.3128	33.8338					53.8	0.661179	0.605833
	53.9	36.3973	34.4035					53.9	36.3973	34.4035					53.9	0.661566	0.604399
	54	36.0107	33.5083					54	36.0107	33.5083					54	0.659808	0.611366
	54.1	35.2173	34.729					54.1	35.2173	34.729					54.1	0.661022	0.614689
	54.2	35.5021	34.0576					54.2	35.5021	34.0576					54.2	0.660104	0.610599
	54.3	36.499	34.5052					54.3	36.499	34.5052					54.3	0.662893	0.609809
	54.4	36.6007	34.9121					54.4	36.6007	34.9121					54.4	0.661823	0.616631
	54.5	35.5428	34.2					54.5	35.5428	34.2					54.5	0.665111	0.613868
	54.6	37.1501	34.9731					54.6	37.1501	34.9731					54.6	0.670578	0.612764
	54.7	35.7666	33.1421					54.7	35.7666	33.1421					54.7	0.673762	0.618889
	54.8	37.4552	34.2407					54.8	37.4552	34.2407					54.8	0.671163	0.618799
	54.9	37.2925	33.7931					54.9	37.2925	33.7931					54.9	0.671102	0.614493
	55	35.38	35.0545					55	35.38	35.0545					55	0.674561	0.61946
	55.1	37.1908	34.5662					55.1	37.1908	34.5662					55.1	0.673473	0.618999
	55.2	36.5194	35.7056					55.2	36.5194	35.7056					55.2	0.677761	0.614418
	55.3	37.2314	34.6883					55.3	37.2314	34.6883					55.3	0.67587	0.624074
	55.4	37.3128	34.8307					55.4	37.3128	34.8307					55.4	0.675447	0.622348
	55.5	37.4552	34.4442					55.5	37.4552	34.4442					55.5	0.682157	0.622176
	55.6	38.0859	33.6507					55.6	38.0859	33.6507					55.6	0.681593	0.624764
	55.7	38.3097	34.3424					55.7	38.3097	34.3424					55.7	0.682391	0.630585
	55.8	37.3739	35.8276					55.8	37.3739	35.8276					55.8	0.684573	0.626283
	55.9	38.0656	35.4614					55.9	38.0656	35.4614					55.9	0.688112	0.624644
	56	37.8011	34.8307					56	37.8011	34.8307					56	0.687676	0.63005
	56.1	37.9639	35.1155					56.1	37.9639	35.1155					56.1	0.688186	0.641123
	56.2	38.3504	35.0342					56.2	38.3504	35.0342					56.2	0.69317	0.635751
	56.3	36.4787	36.6821					56.3	36.4787	36.6821					56.3	0.693878	0.631671
	56.4	36.8042	36.0921					56.4	36.8042	36.0921					56.4	0.694305	0.63378
	56.5	37.4959	35.2173					56.5	37.4959	35.2173					56.5	0.695939	0.63515
	56.6	38.208	33.6304					56.6	38.208	33.6304					56.6	0.698633	0.637593
	56.7	38.1266	33.9559					56.7	38.1266	33.9559					56.7	0.699693	0.638028
	56.8	38.3301	35.1766					56.8	38.3301	35.1766					56.8	0.702285	0.64502
	56.9	38.6759	34.6883					56.9	38.6759	34.6883					56.9	0.701313	0.645009
	57	38.5335	35.9497					57	38.5335	35.9497					57	0.698362	0.644095
	57.1	37.3535	35.5021					57.1	37.3535	35.5021					57.1	0.705252	0.645074
	57.2	38.3097	35.6242					57.2	38.3097	35.6242					57.2	0.707466	0.643408
	57.3	38.0656	34.9731					57.3	38.0656	34.9731					57.3	0.707264	0.646511
	57.4	37.9842	36.56					57.4	37.9842	36.56					57.4	0.704102	0.646609
	57.5	38.9201	35.7869					57.5	38.9201	35.7869					57.5	0.712132	0.649514
	57.6	39.4287	36.377					57.6	39.4287	36.377					57.6	0.712523	0.653608
	57.7	38.0656	36.7025					57.7	38.0656	36.7025					57.7	0.713579	0.653787
	57.8	37.3128	37.2721					57.8	37.3128	37.2721					57.8	0.715252	0.66156
	57.9	38.8997	36.7228					57.9	38.8997	36.7228					57.9	0.720883	0.65519
	58	39.0421	35.4411					58	39.0421	35.4411					58	0.724156	0.653873
	58.1	38.4521	36.7635					58.1	38.4521	36.7635					58.1	0.72346	0.656684
	58.2	39.2253	37.8418					58.2	39.2253	37.8418					58.2	0.724674	0.662206
	58.3	39.6322	37.3128					58.3	39.6322	37.3128					58.3	0.726456	0.667246
	58.4	38.1266	38.4521					58.4	38.1266	38.4521					58.4	0.726763	0.666664
	58.5	40.1204	38.9608					58.5	40.1204	38.9608					58.5	0.728295	0.667462
	58.6	39.1032	36.9669					58.6	39.1032	36.9669					58.6	0.729949	0.659955
	58.7	40.6291	37.2925					58.7	40.6291	37.2925					58.7	0.730152	0.66613
	58.8	39.6118	36.7025					58.8	39.6118	36.7025					58.8	0.733131	0.667914
	58.9	40.3035	37.3942					58.9	40.3035	37.3942					58.9	0.733033	0.667365
	59	39.4694	37.9842					59	39.4694	37.9842					59	0.735148	0.671287
	59.1	40.2222	37.1501					59.1	40.2222	37.1501					59.1	0.737018	0.678999
	59.2	40.1001	36.5194					59.2	40.1001	36.5194					59.2	0.737807	0.674923
	59.3	40.3239	36.5804					59.3	40.3239	36.5804					59.3	0.741829	0.68082
	59.4	39.9984	37.028					59.4	39.9984	37.028					59.4	0.742363	0.681696
	59.5	40.1815	37.0076					59.5	40.1815	37.0076					59.5	0.742542	0.680126
	59.6	39.6322	37.2111					59.6	39.6322	37.2111					59.6	0.743887	0.679584
	59.7	40.507	37.3535					59.7	40.507	37.3535					59.7	0.748454	0.681833
	59.8	40.8122	38.9201					59.8	40.8122	38.9201					59.8	0.743009	0.689087
	59.9	41.3004	37.618					59.9	41.3004	37.618					59.9	0.748318	0.690553
	60	41.9922	38.3097					60	41.9922	38.3097					60	0.754095	0.690587
	60.1	41.626	37.6994					60.1	41.626	37.6994					60.1	0.75132	0.692565
	60.2	41.158	37.2314					60.2	41.158	37.2314					60.2	0.758063	0.68553
	60.3	41.097	36.5397					60.3	41.097	36.5397					60.3	0.764081	0.690696
	60.4	41.6056	37.6994					60.4	41.6056	37.6994					60.4	0.762057	0.698375
	60.5	40.7918	38.2894					60.5	40.7918	38.2894					60.5	0.762819	0.699988
	60.6	42.6839	38.0046					60.6	42.6839	38.0046					60.6	0.758706	0.694321
	60.7	42.1956	38.5132					60.7	42.1956	38.5132					60.7	0.757845	0.697761
	60.8	41.2801	38.1266					60.8	41.2801	38.1266					60.8	0.760804	0.692182
	60.9	41.1173	39.5508					60.9	41.1173	39.5508					60.9	0.756276	0.692078
	61	42.3381	38.147					61	42.3381	38.147					61	0.760679	0.695565
	61.1	42.3584	38.0249					61.1	42.3584	38.0249					61.1	0.768013	0.69869
	61.2	41.7277	39.327					61.2	41.7277	39.327					61.2	0.762012	0.704668
	61.3	42.745	38.1673					61.3	42.745	38.1673					61.3	0.765949	0.709045
	61.4	42.3584	39.0421					61.4	42.3584	39.0421					61.4	0.766309	0.708187
	61.5	41.7277	39.1846					61.5	41.7277	39.1846					61.5	0.769363	0.711105
	61.6	42.2567	39.449					61.6	42.2567	39.449					61.6	0.777251	0.714404
	61.7	42.0939	39.3677					61.7	42.0939	39.3677					61.7	0.776267	0.719476
	61.8	42.4194	38.6963					61.8	42.4194	38.6963					61.8	0.777744	0.717904
	61.9	43.2739	39.6322					61.9	43.2739	39.6322					61.9	0.782228	0.717647
	62	42.5822	39.4084					62	42.5822	39.4084					62	0.780733	0.719591
	62.1	40.568	40.3442					62.1	40.568	40.3442					62.1	0.780019	0.72382
	62.2	42.3177	39.6118					62.2	42.3177	39.6118					62.2	0.784749	0.720318
	62.3	42.7653	38.7166					62.3	42.7653	38.7166					62.3	0.78499	0.720981
	62.4	44.4946	38.5742					62.4	44.4946	38.5742					62.4	0.785702	0.721098
	62.5	42.4805	38.859					62.5	42.4805	38.859					62.5	0.788152	0.723555
	62.6	42.9891	39.3677					62.6	42.9891	39.3677					62.6	0.791035	0.723356
	62.7	42.6432	38.8997					62.7	42.6432	38.8997					62.7	0.791867	0.726528
	62.8	41.8905	38.0656					62.8	41.8905	38.0656					62.8	0.789927	0.731807
	62.9	43.5384	38.6963					62.9	43.5384	38.6963					62.9	0.788616	0.736686
	63	43.1112	39.8966					63	43.1112	39.8966					63	0.790123	0.734708
	63.1	42.9077	40.2222					63.1	42.9077	40.2222					63.1	0.79243	0.732422
	63.2	41.5039	38.5946					63.2	41.5039	38.5946					63.2	0.794549	0.741512
	63.3	44.3319	40.0594					63.3	44.3319	40.0594					63.3	0.796608	0.739279
	63.4	41.9312	39.3677					63.4	41.9312	39.3677					63.4	0.798409	0.734898
	63.5	42.5211	39.6525					63.5	42.5211	39.6525					63.5	0.801686	0.739067
	63.6	42.5822	39.5304					63.6	42.5822	39.5304					63.6	0.808404	0.743759
	63.7	42.2567	39.6525					63.7	42.2567	39.6525					63.7	0.807684	0.751914
	63.8	42.5822	40.5273					63.8	42.5822	40.5273					63.8	0.807658	0.752213
	63.9	43.1722	39.2863					63.9	43.1722	39.2863					63.9	0.81297	0.752888
	64	44.0267	39.8153					64	44.0267	39.8153					64	0.813826	0.748872
	64.1	42.9891	40.7511					64.1	42.9891	40.7511					64.1	0.807191	0.744061
	64.2	43.5791	41.8091					64.2	43.5791	41.8091					64.2	0.811818	0.74789
	64.3	42.2974	41.626					64.3	42.2974	41.626					64.3	0.813269	0.750144
	64.4	42.5822	40.8122					64.4	42.5822	40.8122					64.4	0.815149	0.753374
	64.5	42.5211	40.9953					64.5	42.5211	40.9953					64.5	0.817681	0.763239
	64.6	43.7419	41.158					64.6	43.7419	41.158					64.6	0.818959	0.758095
	64.7	43.335	40.6291					64.7	43.335	40.6291					64.7	0.814901	0.760719
	64.8	44.7184	41.8701					64.8	44.7184	41.8701					64.8	0.816786	0.767778
	64.9	44.3319	42.5822					64.9	44.3319	42.5822					64.9	0.818841	0.766961
	65	44.4336	41.0563					65	44.4336	41.0563					65	0.813964	0.760443
	65.1	43.8436	41.7684					65.1	43.8436	41.7684					65.1	0.817271	0.766052
	65.2	45.0846	42.277					65.2	45.0846	42.277					65.2	0.823421	0.768011
	65.3	44.4743	41.9718					65.3	44.4743	41.9718					65.3	0.819904	0.770298
	65.4	44.047	42.0736					65.4	44.047	42.0736					65.4	0.820136	0.773135
	65.5	44.6981	41.8294					65.5	44.6981	41.8294					65.5	0.825024	0.764241
	65.6	44.0877	41.7073					65.6	44.0877	41.7073					65.6	0.826904	0.771434
	65.7	43.0094	42.9688					65.7	43.0094	42.9688					65.7	0.827434	0.769779
	65.8	46.1222	41.7073					65.8	46.1222	41.7073					65.8	0.827894	0.77641
	65.9	45.3491	43.2536					65.9	45.3491	43.2536					65.9	0.83153	0.774008
	66	45.8984	42.3991					66	45.8984	42.3991					66	0.838829	0.780608
	66.1	46.3257	41.8498					66.1	46.3257	41.8498					66.1	0.838044	0.78773
	66.2	46.0612	43.3756					66.2	46.0612	43.3756					66.2	0.842252	0.787387
	66.3	45.6136	42.5211					66.3	45.6136	42.5211					66.3	0.837225	0.794215
	66.4	45.5119	44.3929					66.4	45.5119	44.3929					66.4	0.84567	0.78585
	66.5	46.0815	43.2536					66.5	46.0815	43.2536					66.5	0.843802	0.784958
	66.6	46.1222	42.4601					66.6	46.1222	42.4601					66.6	0.842755	0.788871
	66.7	46.224	41.7887					66.7	46.224	41.7887					66.7	0.842995	0.792858
	66.8	45.1457	43.8843					66.8	45.1457	43.8843					66.8	0.849292	0.793466
	66.9	46.7326	42.2974					66.9	46.7326	42.2974					66.9	0.848109	0.793522
	67	44.7388	43.1925					67	44.7388	43.1925					67	0.850653	0.799426
	67.1	45.1253	43.6401					67.1	45.1253	43.6401					67.1	0.847101	0.801448
	67.2	45.1253	43.986					67.2	45.1253	43.986					67.2	0.845908	0.805949
	67.3	45.6339	43.5994					67.3	45.6339	43.5994					67.3	0.851566	0.808862
	67.4	45.3288	43.5791					67.4	45.3288	43.5791					67.4	0.848431	0.81477
	67.5	45.2677	44.2912					67.5	45.2677	44.2912					67.5	0.84497	0.810559
	67.6	45.166	45.2067					67.6	45.166	45.2067					67.6	0.850238	0.802776
	67.7	44.5964	45.6746					67.7	44.5964	45.6746					67.7	0.848169	0.811545
	67.8	46.4274	43.8639					67.8	46.4274	43.8639					67.8	0.848993	0.806692
	67.9	45.166	44.0674					67.9	45.166	44.0674					67.9	0.853163	0.809871
	68	45.6543	44.6574					68	45.6543	44.6574					68	0.852448	0.809796
	68.1	46.814	44.8201					68.1	46.814	44.8201					68.1	0.854765	0.821207
	68.2	45.0643	45.0643					68.2	45.0643	45.0643					68.2	0.862488	0.815705
	68.3	45.7357	44.3522					68.3	45.7357	44.3522					68.3	0.868443	0.81865
	68.4	45.8781	44.3725					68.4	45.8781	44.3725					68.4	0.865088	0.809629
	68.5	46.2443	44.5353					68.5	46.2443	44.5353					68.5	0.866539	0.815815
	68.6	45.9595	45.4305					68.6	45.9595	45.4305					68.6	0.869756	0.819599
	68.7	47.5464	44.7184					68.7	47.5464	44.7184					68.7	0.870855	0.818198
	68.8	46.9564	45.6543					68.8	46.9564	45.6543					68.8	0.868403	0.824211
	68.9	45.3695	44.0267					68.9	45.3695	44.0267					68.9	0.868527	0.822681
	69	47.6888	44.9829					69	47.6888	44.9829					69	0.870534	0.827588
	69.1	45.2677	44.9829					69.1	45.2677	44.9829					69.1	0.868034	0.826066
	69.2	47.3429	43.4977					69.2	47.3429	43.4977					69.2	0.869288	0.831345
	69.3	47.4853	45.1253					69.3	47.4853	45.1253					69.3	0.870735	0.833446
	69.4	47.2615	45.9391					69.4	47.2615	45.9391					69.4	0.87689	0.82793
	69.5	47.0988	44.6574					69.5	47.0988	44.6574					69.5	0.87781	0.831973
	69.6	48.4009	45.3084					69.6	48.4009	45.3084					69.6	0.882107	0.831152
[truncated: 104 more rows]
