# Supplementary material for: ATP and large signaling metabolites flux through caspase-activated Pannexin 1 channels
Source: eLife. 2021 Jan 7;10:e64787. doi: 10.7554/eLife.64787 (PMC7806264; doi:10.7554/eLife.64787)
Supplement: Figure 1—figure supplement 2—source data 2. [file elife-64787-fig1-figsupp2-data2.xlsx]

## Sheet: Sheet1
	Figure 1 Supplement 2E
	fPanx1 Unitary Conductance
		mV	Mean Current (pA)	SEM	N
		50	2.291	0.1939	3
		60	3.004	0.09456	3
		70	4.079	0.1188	3
		80	4.98	0.2742	3
