# Supplementary material for: ATP and large signaling metabolites flux through caspase-activated Pannexin 1 channels
Source: eLife. 2021 Jan 7;10:e64787. doi: 10.7554/eLife.64787 (PMC7806264; doi:10.7554/eLife.64787)
Supplement: Figure 1—source data 1. [file elife-64787-fig1-data1.xlsx]

## Sheet: Sheet1
Figure 1G:	Conductance measurements of fPanx1 in lipid bilayers
	State 1 (left)					State 2 (right)
Voltage (mV)	Mean (pA)	Standard error	n		Voltage (mV)	Mean (pA)	Standard error	n
200	21.375	4.29794	4		200	38.6	4.20991	3
180	18.125	1.70898	4		180	31.32	3.63612	5
175	16.9		1		175			0
160	13.95	1.25	2		160	26.52	1.79566	5
150	16.7	1.78326	4		150	28	2.1	2
140	11.475	0.748749	4		140	25.74	3.68166	5
120	10.52	0.909615	5		120	23.2	2.5548	5
100	9.85	0.507773	6		100	19.7125	1.28069	8
80	7.45	0.753326	4		80	15.78	1.83287	5
75			0		75			0
70			0		70			0
60	6.825	0.481966	4		60	16.16	1.91901	5
50	7		1		50			0
40	5.625	0.432772	4		40	9.675	0.958623	4
30	4.95	0.35	2		30	10.25	1.25	2
20	3.725	0.417083	4		20	7.53333	0.352767	3
10	2		1		10			0
0			0		0			0
-20	-2	0.248328	4		-20	-6.3	1.25033	3
-30	-3.1		1		-30	-9.6		1
-40	-4.86	0.143527	5		-40	-11.4667	0.523874	3
-50	-4.9		1		-50			0
-60	-6.33333	0.202759	3		-60	-14.45	0.05	2
-75	-7.7		1		-75			0
-80	-10.35	1.45	2		-80	-17.6333	0.895048	3
-100	-10.3		1		-100	-19.3	1.2	2
-120			1		-120	-24.5		1
-140	-11.9	0.7	2		-140	-27.25	5.05	2
-150			0		-150			0
-160	-14.4	1.7	2		-160	-30.2667	2.73333	3
-175			0		-175			0
-180	-17.55	1.05	2		-180	-30.9	0.6	2
-200	-22.6	3.4	2		-200	-36.15	7.25	2
