# Supplementary material for: ATP and large signaling metabolites flux through caspase-activated Pannexin 1 channels
Source: eLife. 2021 Jan 7;10:e64787. doi: 10.7554/eLife.64787 (PMC7806264; doi:10.7554/eLife.64787)
Supplement: Figure 2—figure supplement 1—source data 1. [file elife-64787-fig2-figsupp1-data1.xlsx]

## Sheet: Sheet1
	Figure 2 Supplment 1: Bulk dye uptake in caspase-treated fPanx1-containing proteoliposomes
Panx1	-	-	+	+	+
Casp3	-	+	-	+	+
CBX (100uM)	-	-	-	-	+
	1023.26	2482.02	1458.03	9935.84	2510.84
	1099.12	1011.31	3118.7	13005.6	1648.38
	1242.22	1059.03	1207.19	1893.78	4594.34
	2575.39	1223.16	1528.38	6885.17	2200.39
	2229.56	3632.21	2379.29	9421.13	2295.34
	1255.23	1217.89	2561.1	3104.42
	1210.9	4499.65	2505.79	11513.9
	3950.09	4874.35	14708.1	16151.3
	10895.4	3295.98	4203.91	19903.6
			2033.05	4772.59
