# Supplementary material for: ATP and large signaling metabolites flux through caspase-activated Pannexin 1 channels
Source: eLife. 2021 Jan 7;10:e64787. doi: 10.7554/eLife.64787 (PMC7806264; doi:10.7554/eLife.64787)
Supplement: Figure 2—figure supplement 2—source data 1. [file elife-64787-fig2-figsupp2-data1.xlsx]

## Sheet: Sheet1
	Figure 2 Suppl 1: GFP and Sulforhodmine-B Mean Fluorescence Intensity (MFI) in caspase-treated fPanx1-containing proteoliposomes
Expt #	GFP			Sulforhodamine B
	No Casp3	(+)Casp3		No Casp3	(+)Casp3
1	1895.17	1102.6		241.24	1212.69
2	1845.24	1659.78		159.09	591.99
3	463.83	357.57		17.85	668.56
4	946.66	552.12		452.4	1497.54
5	1783.24	1126.87		1168.44	10520
