# Supplementary material for: ATP and large signaling metabolites flux through caspase-activated Pannexin 1 channels
Source: eLife. 2021 Jan 7;10:e64787. doi: 10.7554/eLife.64787 (PMC7806264; doi:10.7554/eLife.64787)
Supplement: Figure 2—figure supplement 2—source data 2. [file elife-64787-fig2-figsupp2-data2.xlsx]

## Sheet: Sheet1
	Figure 2 Suppl 1: Flow cytometry dot plots of ImageStream experiments
	B									C									D									E									F
	(-) Casp				(+Casp)					(-) Casp				(+Casp)					(-) Casp				(+Casp)					(-) Casp				(+Casp)					(-) Casp				(+Casp)
	Liposome	GFP	SR-B		Liposome	GFP	SR-B			Liposome	GFP	SR-B		Liposome	GFP	SR-B			Liposome	GFP	SR-B		Liposome	GFP	SR-B			Liposome	GFP	SR-B		Liposome	GFP	SR-B			Liposome	GFP	SR-B		Liposome	GFP	SR-B
	Object Number	Intensity_MC_Ch02	Intensity_MC_Ch04		Object Number	Intensity_MC_Ch02	Intensity_MC_Ch04			Object Number	Intensity_MC_Ch02	Intensity_MC_Ch04		Object Number	Intensity_MC_Ch02	Intensity_MC_Ch04			Object Number	Intensity_MC_Ch02	Intensity_MC_Ch04		Object Number	Intensity_MC_Ch02	Intensity_MC_Ch04			Object Number	Intensity_MC_Ch02	Intensity_MC_Ch04		Object Number	Intensity_MC_Ch02	Intensity_MC_Ch04			Object Number	Intensity_MC_Ch02	Intensity_MC_Ch04		Object Number	Intensity_MC_Ch02	Intensity_MC_Ch04
	0	2123.85	6972.45		0	789.5	4220.61			0	3554.75	4369.62		0	871.441	737.645			0	1323.57	3.51562		1	6.6	-11			0	2019.53	248.789		0	2222.86	288.864			0	598.029	70.6176		0	594.736	229.789
	2	2608.08	36613.2		1	1527.83	69674.9			1	3411.17	723.174		1	456.913	334			1	881.25	-70.125		2	-93.5543	3207.41			1	620.973	109		1	2136.55	900.364			1	1327.16	108.579		1	6676	2652
	4	798.625	25079.8		2	1381.96	5678.76			2	1125.93	230.697		2	233.792	659.833			2	470	15.375		3	13.1	5.1			2	656.432	63.1838		2	2017.28	406.421			2	1672.16	4932.47		3	491.02	29998.3
	5	1247.91	581.975		3	362.793	12302.9			3	207.697	1939.28		3	344.447	469.026			3	1744.73	-22.3636		4	138.329	1132.24			3	993.579	5.21053		3	3528.16	408.045			3	4810.28	224.29		4	-44.3889	12694.6
	7	2849.59	919.447		4	700.326	25945.9			4	1120.23	356.882		4	720.079	419.421			4	1016.68	31.1579		5	-4.09524	744.857			4	1205.5	5.5		4	838.059	1271.52			4	569.235	-24		5	192.615	7920.25
	18	2465.35	1168.85		5	3759.99	63297.5			5	1330.62	513.328		6	845.75	938.474			5	1103.56	-22.0556		6	708.842	64.7368			5	2260.33	217.333		6	1155.47	934			5	10984.3	689.031		7	750.5	697.75
	20	2137.48	645.937		6	1349.24	7870.28			7	443.487	248.118		7	913.237	1783.14			6	121.525	-6.3		7	48.7	26.2125			6	1767.94	22.8235		8	1140.43	26876.8			6	698.717	84.1776		8	5944.36	2104.79
	26	1884.92	180.832		7	718.529	2860.2			8	1365.61	2926.52		8	566.429	3783.36			7	487.05	28.575		8	0.6	19.2			7	1160.48	82.875		10	1189.49	313.862			7	976.313	82.1479		9	990.153	482.944
	27	641.025	275.741		8	2442.52	59546			9	3423.72	1628.58		10	4034.76	42977.8			8	1286.67	150.333		9	17.4803	1687.93			8	1528.26	72.4485		11	6097.44	1188.85			8	421.329	34359.1		10	931.216	439.874
	28	910.386	643.705		9	2791.87	10759			10	280.941	457.735		11	174.855	2058.49			9	657.868	-20.8421		10	-23.6875	569.25			9	1750.05	54.9412		13	724.889	662.556			9	2307.74	251.58		11	1020.84	352.645
	29	996.909	419.837		10	2166.14	13105.8			11	5294.96	4176.74		12	438.987	927.013			10	19350.2	385.56		11	-10.0526	1306.84			10	1462.53	9125.23		14	1283.16	347.947			10	32149.8	1848.44		12	263.276	4710.12
	30	3506.34	360.469		11	243.362	19025.1			12	2480.54	891.202		14	977.24	2876.44			11	273.875	25.6875		12	-31.1667	1027.17			11	3001.11	128.763		15	3341.49	18.705			11	1302.12	43.9403		13	3388.28	1575.17
	33	976.75	183.125		12	3042.26	9866.5			13	1804.76	2049.21		15	223.868	284.868			12	40.7759	-0.715909		13	643.375	96.9375			12	3260.38	379.921		16	3816.6	1245.55			12	5046.97	748.921		14	76.599	12904.9
	34	731.229	12166.3		13	2320.27	12880.2			14	2664.16	307.316		16	373.375	3954			13	801.054	16.8421		14	-29.0395	1107.79			13	908.562	125.542		17	1817.81	8175.97			13	2262.75	189.477		15	2911.66	-75.9318
	36	3897.69	1646.6		14	1281.19	7894.81			15	3467.3	2140.34		17	238.344	139.25			14	44.1316	10.0238		15	2189.93	222.522			15	3356.49	113.816		18	814.5	18398.3			15	968.844	68.375		17	345.898	14013.4
	37	2554.35	195.152		15	1087.25	15648.9			16	1800.01	178.526		18	583.579	372.632			15	14.3438	13.675		16	1087.41	3891.23			16	1095	254.645		19	924.684	165.632			16	2223.08	428.583		19	1145.79	68.6842
	39	835.575	332.225		17	398.019	1361.42			17	1243.15	465.576		19	325.447	2451.74			16	964.181	18.7639		18	-3.85	-15.1			17	3289.31	132		20	3697.95	685.211			17	260.671	816.961		21	838.105	414.368
	42	928.927	352.277		18	606.305	2927.46			18	1449.48	446.174		20	437.188	1838.92			17	1070.09	-52.7697		19	-5.46324	706.426			18	4446.89	32.8421		21	613.658	102.395			18	4993.25	272.63		22	1480.16	1903.68
	44	812.25	3052.06		19	621.799	3652.86			19	1205.37	320.842		21	469.342	504.618			18	6.75	2.52273		20	3.43421	991.184			19	1302.18	113.882		23	1354.13	1056.69			19	2265.71	132.708		23	250.417	12980.9
	46	498.095	8378.73		20	1544.29	5733.74			21	4073.5	1296.77		22	405.355	425.243			19	633.281	-12		21	-58.2059	1620.97			21	2767.14	147.974		24	988.361	161.028			20	947.382	308.676		24	1635.91	827.961
	47	1985.8	716.4		21	515	19333.4			22	667.289	89.8026		23	949.947	558.789			20	1305.33	-3.33333		22	-0.525	214.013			22	1784.89	62.7961		26	1752.62	15.5			21	2469.64	140.803		25	3401.76	1542.07
	48	2107.67	783.417		22	977.074	9341.08			23	2080.17	352.648		24	266.316	246.053			21	940.278	-3.69444		23	-53.5179	1261.93			23	8533.62	769.41		27	2284.18	334.684			22	1512.57	96.9013		26	214.696	11198.3
	49	1128.39	395.889		23	957.926	46660.9			24	2696.25	2791		26	1040.64	1132.3			22	818.228	10.425		24	1.09091	5542.09			24	896.273	12.3438		30	725.38	12954.5			23	1725.38	1130.53		27	1091.7	9404.56
	50	1913.07	488.88		24	1902.94	14636.9			25	959.286	202.857		27	321.556	2766.94			23	595.154	-2.84559		26	-10.05	-28.85			25	2519.36	169.717		31	1689.47	209.395			24	5852.57	358.771		28	1190.77	712.934
	51	2693.66	1098.67		25	381.5	28004.4			26	4931.76	679.02		28	269.11	2564.22			24	447.958	-5.02083		27	-57	2195.5			26	4477.77	288.612		33	1937.69	190.25			25	752.23	131.638		29	520.853	126.544
	52	765.556	236.111		26	2057.5	13120			27	173.079	1465.63		30	961.026	9390.08			25	1147.44	-22		30	-24.9091	723.955			28	772.875	371.083		34	1016.11	99.5556			26	1780.67	7.57065		31	2713.51	544.333
	53	839.028	130.5		27	845.937	3532.18			28	859.705	474.432		31	325.841	1124.52			26	71.9494	3.525		31	-15.0147	444.456			31	355.93	5882.86		37	927.764	416.611			27	301.743	100.279		32	928.496	35831.1
	54	445.182	446.5		28	3167.45	11816.7			29	3393.64	252.073		32	410.062	317.599			27	25.0446	-1.63393		32	-77.3684	2637.95			32	1494.95	-7.07895		39	344.217	6840.71			28	136.438	1633.38		33	562.542	7473.89
	55	3572.95	1666.13		29	2126.82	26169.5			30	1373.89	804.565		33	326.408	130.783			28	78.4348	27.3478		33	-133.675	5165.37			33	1834.5	260		40	479.743	114.396			29	932.283	2491.37		34	3373.37	536.841
	56	425.759	7883.94		30	1486.74	49882.9			32	808	333.5		34	428.042	225.188			29	212.6	9.9		34	-310.856	10962.1			34	3479.11	568.947		41	1814.8	713.947			30	1976.02	378.25		35	463.167	5637.08
	57	769.75	168		31	635.684	1520.03			33	4163.99	2311.18		36	455.923	5161.96			30	806.408	3.32237		35	1.29545	581.278			36	327.618	69.5329		42	2114.49	358.648			31	784.691	271.066		36	278.952	16639.3
	59	1523.18	654.921		32	235.115	16651.2			34	1162.27	130.691		37	281.054	294.161			32	242.328	6.23438		36	-0.960526	573.263			37	505.361	11.3333		43	2517.89	188.286			32	2915.88	163.25		38	175.576	6427.03
	61	3647.09	1492.18		33	1050.01	5091.25			35	660.719	163.453		38	320.667	153			33	752	-13.3158		37	-26.1645	705.007			38	962.765	73.8235		44	1351.08	131.961			33	1421.02	116.969		40	5524.36	1605.36
	62	3348.91	61228.3		34	2180.64	14714.9			36	845.605	79.6842		39	361.154	4056.12			34	11.525	-8.125		38	-14.9286	484.857			39	4519.57	575.979		46	1469.16	2648.22			34	7667.55	1376.57		41	4772.75	1797.55
	63	2568.01	938.444		35	1859.11	16196			37	1464.6	565.447		40	3271.09	23908.7			35	623.691	30.3088		39	898.5	9.5			40	922.938	80.5		47	3804.08	430.895			35	1480.82	147.52		42	961.271	162.597
	64	2693.08	370.208		36	4114.75	8621.89			38	1375	135.5		41	216.812	2424.03			36	1239.78	-134.776		40	65.6667	773.833			41	1471.32	8.59868		48	4040.22	58.6776			36	1698.47	1407.9		43	157	7501
	65	4451	1327.75		37	1124.76	6756.51			40	3519.7	1517.84		42	2154	1148.93			37	44.25	-3.5625		41	5.47222	789.361			42	1213.18	221.23		50	1256.61	4251.37			37	1295.42	107.394		44	4059.95	943.197
	69	346.635	8131.25		38	1379.19	4320.53			42	4051.79	644.599		43	907.592	5536.54			38	905.694	-1.54375		42	-113.763	3573.58			43	1092.5	52.3333		51	6626.66	785.983			38	771.859	-92.6406		45	267.318	574.409
	70	4679.07	1842.5		39	730	38800.1			43	400.145	203.329		44	3901.6	7664.25			39	565.667	-11.3333		43	-21.2763	469.645			44	975.852	-45.8359		52	5669.18	930.19			39	1178.13	124.306		46	548	292.333
	72	1651.58	241.458		40	1507.75	8379.32			45	3063.92	863.719		45	251.625	2679.5			40	14.7	11.55		45	63.6118	1358.91			45	3533.17	127.182		54	719.022	154.081			40	1967.79	-80.4737		47	1623.66	2651.93
	73	3961.58	1387.8		41	1673.21	8963.19			46	512.125	59.2206		46	2179.58	2891.83			41	1309.43	-16.5		46	-16.7237	924.796			46	1427.96	50679.5		56	551.75	403.75			41	1448.8	35.8684		49	1121	339.5
	74	3144.41	1096.64		42	-45.6875	16928.7			47	1686.88	392.575		47	506.262	215.143			42	732.926	-2.38235		47	-83.9	2642.85			48	889	17.5417		57	1002.58	99.8456			42	3462.76	271.592		50	496.852	128.445
	75	398.058	358.596		43	674.06	3676.13			48	308.421	110.421		48	610.84	8051.88			43	1079.88	-16.1406		48	-12.8182	708.364			49	1478.31	201.952		58	2003	988.625			45	7082	643		51	-48.2174	5550.96
	76	962.138	242.306		44	754.094	6179.53			49	920.868	164.5		50	1022.95	2038.97			44	218.062	14.4375		49	17.75	777.076			50	2176.62	157.206		59	1027.6	247.441			47	1484.08	76.9286		52	184.641	6068.72
	77	4396.93	2235.38		46	2479.56	12746.8			50	2141.79	272.163		51	205.776	1712.47			45	361.294	13.8824		50	-126.969	3673			51	3645.93	49.6442		61	713.007	75.0972			49	1313.95	14.8421		53	811.158	436.84
	79	2002.79	588.487		47	2137.29	11728.2			51	2146.43	1019.07		54	475.31	5506.78			46	8.7375	-8.375		51	-4.81579	643.118			52	796.941	18.0515		62	2562.32	262.767			50	3478.19	217.635		54	2665.42	1245.04
	80	3007.87	4852.22		48	1212.58	4889.06			54	1946.49	1038.32		55	518.694	6290.93			47	410.531	-6.125		52	753.45	6.55			53	1052.76	252.088		63	347.48	8561.52			51	919.403	118.486		56	667.476	213.571
	81	3506.22	372.667		49	1520.9	8026.34			55	1104.67	192.19		56	1334.81	1356.65			48	1035.91	13.3026		53	1181.61	3.92105			54	1283.15	86.6845		65	1511.4	9935.4			52	2250.41	166.355		57	460.867	100.008
	82	1612.96	1341.28		50	2177.37	55598.5			56	2322.36	1061.35		57	569.896	4027.9			49	867.853	-31.1397		54	1312.24	26.6316			55	15053.3	1528.78		68	856.5	256.781			53	1492.59	57.9167		58	425.146	5162.77
	83	1389.33	912.921		51	269.79	8288.88			57	1026.88	93.369		58	636.083	854.125			50	1115.42	91.0515		55	2182.73	50.6023			56	1974.36	191.976		70	1073.05	280.985			54	3640.31	20.83		59	899.395	232.829
	84	1844.83	1207.06		52	523.106	4128.07			61	46.4583	949.208		59	422.625	3734.25			51	1018.61	29.7039		56	1195.04	21.3036			57	1621.08	71.1184		71	1120	234.895			55	3950.39	234.316		60	2298.65	675.188
	85	978.645	327.36		53	3418.18	20157.2			63	809.798	246.696		60	933.132	891.513			52	999.75	88.75		57	1391.07	426.932			58	12698.7	545.4		72	4334.24	1123.44			56	10618.6	720.625		61	842.875	167.125
	86	1728.46	597.375		54	4751.9	25212.3			64	2146.61	431.407		61	520.548	4345.65			53	833.444	7.77778		58	-78.4239	1234.96			59	711.562	89.2847		73	1063.66	240.434			57	1628.15	59.2941		63	1636.46	1683.8
	87	1064.5	190.895		56	742.853	4456.5			65	893.222	198.381		63	573.631	2427.89			54	19.7857	1.25		59	-50.9074	5865.42			60	8046.57	796.357		77	1063.5	118			58	1120.68	92.6842		64	7151.59	4962.21
	88	793.271	-12.1562		57	652.443	2066.2			66	141.986	18.1667		64	485.516	3505.28			55	909.667	15.5882		60	-6.51389	663.562			61	3841.21	1274.12		79	1657.81	343.562			60	3966.72	551.151		66	305	14815.5
	89	881.625	122.284		58	1042.75	8874.3			67	968.714	150.357		65	722.737	754.132			56	478.514	1060.72		61	-27.7898	1142.86			62	681.861	93.1528		80	3077.91	477.062			61	443.315	411.831		67	1481.28	889.895
	90	2094.16	517.3		59	449.087	1795.9			68	1405.95	645.823		66	355.704	675.678			57	50.1538	-40.475		62	-42.0526	1151.53			63	2118.09	237.951		82	403.981	6802.45			62	492.447	752.507		68	1489.89	1892.03
	91	1641.11	1002.33		60	2201.91	22412.7			70	2523.3	690		67	447.013	367.217			58	628	72.5		63	30.3684	641.974			66	872.928	125.572		83	2945.01	210.697			63	16834.5	2094.39		69	1146.85	592.104
	92	327.8	2729.69		61	2690.4	118574			71	1914.05	400.395		68	430.533	296.303			59	1129.25	84.6406		64	-2.5	300.25			67	1277.95	81.6842		84	788.016	33.1016			64	2744.2	269.2		70	761.632	204.546
	93	1995.91	713.781		62	1446.72	19888.6			72	681.882	230.471		69	2133.38	20480.4			60	2030.44	-18.75		65	1957.46	222.429			68	1185.66	111.408		85	201.115	13198.1			65	5840.36	456.3		71	566.447	462.789
	94	1113.65	414.736		64	2073.52	16864.5			74	2892.79	1474.32		70	594.178	520.809			62	686.93	-2.28906		66	1.93182	778.551			69	7755.91	144.987		87	449.11	363.654			66	884.453	157.875		72	499.776	618.926
	96	2023.08	2791.29		65	697.693	2274.18			75	2275	1623.79		71	149.421	1788.72			63	884.353	0.338235		67	-3.79545	957.841			70	7717.22	387.461		88	1024.64	118.539			67	141.531	5168.89		73	726.559	237.743
	97	1024.41	901.835		66	582	5304.62			76	219.382	645.41		72	283.488	3399.69			64	34.1395	-54.5		68	17.3289	977.678			71	2630.32	251.684		89	848.597	108.743			68	1981.53	105.984		74	2426.34	1494.51
	100	1977.44	189.41		67	421.162	11403.9			77	1009.46	692.75		73	66	1173.44			65	654	21		69	-59.7381	1392.49			72	4098.53	878.138		90	2343.32	264.932			69	2418.22	319.667		76	681.263	223.211
	103	2341.69	776.399		68	-234.75	14965.3			79	7460.89	2525.98		74	999.848	1790.9			66	22.3125	4.8125		70	-85.2961	1061.67			73	8153.5	648.038		91	5491.59	313.98			70	3685.99	118.995		77	1269.5	521.389
	104	2192.82	565.032		69	463.476	3183.08			81	1338.87	975.605		76	443.75	376			67	622.632	-34.7941		71	-16.2955	590.494			75	902.27	-29.0658		93	1966.57	289.303			71	11667	1164.29		78	568.312	241.594
	105	4155.78	1703.23		70	2683.9	4105.85			82	606.06	386.266		77	681.783	433.957			68	576.735	-47.6029		72	883	16.4706			76	159.5	1.25		94	1038.32	138.895			72	475.553	3521.14		81	1103.44	361.341
	106	1549.42	310.842		71	719.463	3933.56			83	2966.05	1058.98		78	329.184	218.408			69	729.474	24.8421		73	-44.75	2317.1			77	652.775	86.1328		95	939.471	109.118			73	1354.1	-19.0147		82	4292.23	3337.6
	108	659.675	-46.275		72	2675	23763.6			86	3968.85	1293.64		79	243.467	424.414			70	582.986	36.3889		74	1180.29	37.2961			78	12376.5	845.16		96	1360.93	377.213			74	1231.94	64.3333		83	878.015	37482.1
	109	4290.75	860.345		73	508.783	1572.67			88	663.779	204.235		81	1040.53	6203.72			71	690.355	22.4934		75	-53.2434	645.375			79	3984.04	391.783		97	1779.26	198.943			75	3775.4	1224.93		84	646.632	167.053
	110	3000.6	1456.65		74	1404.91	4689.4			89	1755.69	144.701		82	206.5	1965.5			72	654.312	-25.4219		76	-21.2368	512.868			80	899.921	-16.7895		98	1960.45	274.049			76	2787.47	76.0263		85	1665.17	252.961
	112	4562.74	2012.78		75	679.512	22451.3			90	1310.14	347.636		85	834.193	1404.94			73	639.194	3.05263		77	-9.36765	552.574			81	1418.33	14.6667		99	4409.96	530.526			78	1727.37	-29.3563		86	2848.32	1323.42
	113	1442.4	693.79		76	1020.22	5567.22			92	92.5	1003.5		86	444.567	4442.81			74	1407.88	60.375		78	46.4013	863.158			85	848.471	25.8824		100	1622.12	636.625			79	967.862	1770.76		89	375.5	7636
	114	844.053	131.112		77	2922.22	8744.24			93	1419.48	332.38		87	206	583			75	992.531	-12.5938		79	736.824	25.8162			86	1299.78	48.5147		102	2267.24	387.974			80	1.42593	7870.65		90	836.145	4562.93
	117	1064	366.25		78	969.259	8015.19			94	894.542	310.681		88	612.526	1044.04			76	892.581	-3.41176		80	-8.31579	615.263			88	1502.19	65.3125		103	7349.81	903.238			81	736.632	39.6842		91	973.25	207.053
	118	1884.04	861.12		79	3807.65	51185.5			95	2883.47	566.428		89	444.292	429.75			77	688.062	-27.125		81	-26.32	512.447			89	581.266	152.969		104	2114.33	309.855			82	19040.6	1211.66		92	1779.98	549.688
	120	1746.86	-251.719		80	3518.7	45450.7			96	3250.93	1032.43		90	1124.88	4526.88			78	87.95	19.5		82	15.1447	645.224			91	1165.71	23.7812		105	1347.11	400.842			83	349.867	126.094		93	1408.27	501.763
	121	1304.42	437.333		82	1779.62	12311.3			97	1542.68	725.039		91	461.957	1032.13			79	870.537	51.2188		83	-57.1908	1133.05			92	1175.33	72.2302		106	817.25	129			84	1257.84	146.286		94	1683.85	570.982
	123	471.065	202.572		83	1377.75	51957.3			98	1998.52	534.217		92	690.368	7450.42			80	531.972	13.0694		84	726.662	53.9412			93	4932.8	70.38		107	589.5	7482.5			85	253.221	9565.28		95	1030.28	699.097
	124	1064.46	659.637		84	984.411	493.975			99	2127.44	108.809		93	373.737	5097.5			81	731.469	60.4375		86	-112.263	2617.47			95	1084.47	1348.07		108	2166.57	8.64474			86	569.294	45.2647		96	414.197	12301.1
	125	2607.04	26569.4		85	173.391	11825			100	1618.72	427.103		95	373.542	339			82	1338.62	-13.4643		87	825.215	97.8542			96	5137.4	492.941		109	963.444	5.44444			87	1430.14	-22.8571		97	963.53	1514.58
	126	1517.56	1570.77		86	806.963	4700.6			101	1249.71	488.329		96	1298.97	8669.88			83	1710	2.33824		89	-32.4375	1780.99			97	568.472	14.9236		111	14250.1	182.824			88	1917.79	82.2105		98	187.25	7633.51
	127	768.325	198.6		87	1709.62	12025.4			102	1624.52	1065.8		97	781.461	3228.26			84	829.456	28.8		90	-3.53947	708.461			98	1366.04	152.494		113	5761.2	816.171			89	3413.64	406.158		99	1363.18	895.632
	128	759.458	14405.2		88	1621.58	4761.9			103	811.132	127.263		98	183.434	1943.63			85	654.234	44.6328		91	-35.0417	1075.42			99	682.855	22.9605		114	339.611	14655.8			90	5225.2	159.531		101	564.911	488.94
	129	673.821	29925.4		89	190.608	8652.91			104	125.147	1385.96		99	848.842	877.026			86	1348.64	43.2961		92	-129.167	7619.5			100	769.836	43.6562		116	1703.19	224.75			91	1152.25	242.775		102	436.5	878
	130	885.368	435.179		90	142.836	13759.6			106	1114.26	207.263		100	1235.6	3822.99			87	856.541	14.875		93	-60.8333	2669.72			103	892.531	114.131		118	794.952	196.095			93	1276.79	59.3056		103	135.75	10066.5
	131	14.4583	2389.79		91	1405.77	38864.4			107	2603.12	465.276		101	2544.42	7137.95			88	92.1522	1.69792		94	1074.33	60.6562			104	1435.21	1043.84		119	7760.22	1487.44			94	5802.9	311.424		104	519.647	221.529
	132	1964.26	845.789		92	175.37	11333.5			108	56.7237	1090.42		102	375.353	269			89	1341.08	-2.13158		95	-56.8519	3661.44			105	1624.99	122.452		120	14733.9	9808.84			95	1510.43	167.699		105	510.926	85.7206
	133	997.5	480.5		93	168.79	8945.28			111	587.317	2344.74		103	513.303	572.276			90	199.9	32.4		96	-29.1042	2423.22			106	2105.27	543.909		122	1518.7	100.107			98	1770.54	148.978		106	855.515	259.721
	135	1424.26	2388.91		94	677.138	4069.44			112	2764.75	390.05		104	266.984	191.406			91	1002.62	60.1597		97	-18.0435	1495.82			107	896.278	106.444		123	462.595	2871.88			99	1098.62	127.794		107	2	8283.75
	136	3825	1212.2		96	1279.5	11898.2			113	846.342	252.526		105	1419.14	1171.04			92	1436.69	-29.2222		98	630.972	25.1389			108	1045.13	347.035		124	896.95	67.55			101	4225.37	119.526		108	809.455	249.328
	137	151.68	12174.5		97	870.333	4562.78			114	640.664	83.3026		107	772.118	2901.93			93	96.3125	-4.4375		99	1461.39	44.5263			109	776.971	44.6103		125	841.167	14670.4			102	1337.97	51.0132		109	230.547	344
	138	4034.93	1111.75		98	597.89	22717.3			115	93.0526	1138.68		108	4081.37	7763.81			94	18.7386	7.67614		100	761.919	-44.8897			110	1118.91	113.812		126	2077.43	573.895			103	2703.68	96.2679		110	1198	5584.96
	139	2896.4	819.6		99	2144.77	12835.5			116	806.326	163.681		109	1648.01	16460.4			95	632.471	-6.47794		101	-72.8947	1832.84			111	635.559	58.9706		127	394.188	10376.7			104	739.02	73.1579		111	4170.16	811.98
	141	402.5	210.851		100	1605.95	2509.97			117	2808.03	1304.21		110	3060.7	8739.44			96	1684.73	-48.2895		102	1472.17	65.2917			112	2583.2	272.832		128	2187.65	300.458			105	6730.67	480.292		112	1700.55	2698.83
	142	717.2	2840.04		101	375.223	28827.7			118	722.079	1525.07		111	692.846	6270			97	567	44.75		103	6.32237	862.046			114	1147.12	-85.3625		129	1158.04	126.071			106	746.328	-31.5781		113	619.824	268.309
	143	784.365	1072.34		102	75.5739	13471.2			119	734.562	416.438		112	479.915	542.358			98	914.441	-27.1974		104	663.461	12.8289			115	8127.67	427.289		130	250.346	9958.94			107	3285.91	371.552		114	600.272	1155.98
	144	2477.45	1787.74		103	1004.09	2024.92			121	380.522	96.7132		113	505	380.5			99	2665.33	-53.7105		105	-91.0263	1402.61			116	3898.51	313.684		132	11829.4	1352.76			108	558.849	936.22		115	1123.31	1473.07
	145	3259.25	352.67		104	1553.27	8300.22			122	1367.54	764.57		114	437.347	502.062			100	1217.36	41.4226		106	-38.5132	1874.06			117	3717.86	216.395		133	1982.5	406.612			109	180.333	9784.48		116	625.586	429.612
	146	1179.92	469.585		105	543.5	3426			123	202.901	1727.6		115	797.237	10636			101	617.618	33.7632		107	-51.4167	1731.92			118	1954.39	76.9408		135	1346.06	93.7625			111	323.711	715.263		117	735.987	4326.99
	147	3126.62	1898.62		106	770.875	3957.97			125	1371.55	292.5		116	294.979	3683.68			102	808	-18.7313		108	737.333	68.2222			119	2387.83	136.539		136	1379.97	602.418			112	1033.22	40.1563		118	3226.37	1062.06
	148	355.486	6383.28		107	1919.07	11312.4			126	945.283	1563.02		117	270.944	2918.67			103	882.038	-25.9688		110	72.4	5120.75			120	1306.44	69.1549		137	1120.75	152.75			113	1515.25	54.7042		119	732.458	673.528
	149	455.673	479.173		109	774.385	9762.12			127	970.171	191.829		118	3447.99	3056.74			104	1297.58	-19.4737		111	13.8816	825.789			121	2055	-24.75		139	3170.33	783.474			114	1882.34	207.763		120	9193.53	2468.62
	150	1015.08	307.644		110	2406.21	8984.82			128	595.975	98.375		119	281.842	418.671			105	26.7632	5.35		112	683.364	520.636			123	1297.41	123.235		140	1249.6	77.2206			116	675.523	150.326		121	511.717	629.355
	151	1963.71	1542.5		111	1606.64	11784.5			129	4372.68	554.356		120	357.88	2593.81			106	1239.42	-12.0625		113	915.625	44.375			124	1011.18	42.7368		141	746.805	254.297			117	1122.71	79.3393		122	308.88	2936.11
	152	4090.56	1079.6		112	1221.21	5397.3			130	977.714	183		121	1450.63	13771.9			107	433.041	45.6447		114	-42.0625	826.056			125	3848	292.368		142	9666.88	936.105			118	1316.14	-67.8		123	546.671	158.329
	153	1006.35	412.278		113	353.537	19953.2			131	3269.7	692.02		122	2000.46	1675.12			108	817.978	1.77941		115	880.268	-13.7857			126	1118.09	-101.586		144	3540.38	2254.32			120	1717.16	258.466		124	1094.16	396.579
	154	777.949	45988.9		114	1332.09	7542.92			132	2405.93	1576.62		123	2036.25	2297.38			109	68.913	-12.5		116	30.1908	998.658			127	1756.03	22.4211		146	3255.72	359.237			121	6078	413.788		126	2529.07	1019.15
	155	2692.12	939.125		115	584.667	2326.54			134	1369.07	467.043		124	555.73	4617.51			110	1555.25	18		117	752	121.944			128	1534.93	75.625		147	471.796	2226.39			122	1170.37	49.8824		127	3820.51	4117.2
	156	2580.02	550.45		116	738	19619.3			135	847.958	1023.69		125	2648.41	3425.94			111	638.269	29.0938		118	2.63043	782.951			130	8764.47	934.219		148	600.303	4699.19			124	2543.72	248.386		129	650.871	20486
	157	996	366.923		117	1854.38	12506.4			137	975.107	294.94		126	1445.68	1383.89			112	0.03125	-5.35938		119	441.078	4369.81			131	2823.08	280.895		149	5788.34	501.16			125	1325.38	1407.98		130	1358.75	376.5
	158	1069.71	470.667		118	482.46	11421			138	480.215	210.806		127	2424.67	8943.59			113	76.9205	-6.81818		120	1733.63	1170.12			132	5322.98	347.138		150	3387.62	521.987			126	1106.68	170.867		131	2385.3	1039.55
	161	3424.35	1757.54		119	3568.89	9629.24			140	1898.16	2204.23		128	779.14	8863.14			114	1105.43	88.5132		121	-81.3421	4904.26			133	842.105	122.316		151	1788.81	1872.15			127	3213.34	441.526		133	1929.27	910.638
	163	2114.4	130.821		120	1162.33	6092.99			142	1836.51	710.49		129	488.175	4733.07			115	742.706	-17.7059		122	836.316	74.6053			134	1318.21	212.053		152	6286.98	666.54			128	860.794	256.088		134	1767	814.667
	164	778.071	442.238		121	1109.62	4469.16			143	508.737	290.737		130	777.761	485.193			116	454.303	17.8026		123	-3.58523	1018.55			135	738.914	47.7422		153	1073.59	2376.45			129	371.98	317.283		135	2500.96	1984.09
	165	5223.95	7100.95		122	1284.19	6730.55			145	1805.05	892.076		131	1093.62	1509.25			117	795.06	-27.8382		124	-418.719	16642.2			136	1484.12	157.375		154	986	10002.4			130	835.49	6114.97		136	767.924	259.799
	166	689.375	324.911		123	1255.63	7459.62			146	3109.76	826.46		132	1596.57	3233.44			118	1026.08	66.25		125	636.319	-29.2639			137	1202.44	200.448		155	1313.73	145.211			131	10682.1	1869.71		137	1438.09	195.194
	167	191.26	7504		124	1058	25441.5			147	789.588	366.412		133	351.164	213.48			119	907.25	8.25		126	1203.15	357.951			138	1342.02	52.4643		156	1562.2	5171.68			132	2616.67	48214.8		139	1498.82	425.773
	168	288.146	7869.33		125	1089.58	3178.15			148	937.897	221.213		134	337	3947.8			120	2467.01	12.9076		127	836.187	64.25			139	4745.96	220.72		157	367.472	13877.3			134	4377.05	137.33		140	2782.13	864.974
	169	4651.5	2181.5		126	2949.53	76239.2			149	514.105	83.3158		135	951.538	9470.8			121	32.1087	-10.7174		128	-25.6413	1751.99			140	90.875	-10.4875		158	2607.02	440.364			135	2865.1	-74.9474		141	1175	127
	170	625.947	268.316		127	1362.23	24837			150	1383	262.789		136	561.5	6622.25			122	-1.05769	1482.05		129	282.566	1264.35			142	1593.26	51.5789		159	710.68	13782.7			136	765.5	239.25		142	274.5	3913.56
	171	3144.11	1212.7		128	3743.67	62578.1			151	211.562	1999.78		137	186.25	2421.22			123	327.625	-23.25		130	-1.57895	638.526			143	10850.1	861.924		161	2817.17	393.595			137	1630.52	6.14474		143	1508.8	7179.5
	172	2124.52	2815.05		129	1034.29	13386.1			152	593.842	403.263		139	507.5	5586.59			124	1080.38	54.4688		131	-22.6806	1217.35			144	564.139	98.8472		162	1732.72	941.625			139	28.5652	3.67391		144	477.261	412.33
	173	3602.51	37844.9		130	2885.43	52025.9			153	898.421	263.474		140	660.08	7646.6			125	951.844	51.375		132	-46.1053	1394.05			145	419.273	73.3125		163	896.853	41.0809			140	2021.75	91.75		146	1985.2	569.207
	174	282.18	9573.47		131	979.729	2416.52			155	1829.84	659.684		141	326.382	3491.41			126	777.158	-7.89474		133	151.3	1746.43			146	9242.06	666.375		164	379.278	128.556			141	2237.22	290.182		148	347.591	17689.3
	175	1298.24	1233.6		132	1580.71	8234.09			156	734.421	195.888		142	300.02	2989.66			127	1574.16	57.9211		134	3272	2876.5			147	12055	700.935		165	1556.39	317.513			142	3105.95	531.757		149	591.083	15.25
	176	3039.7	1251.2		133	1979.62	8397.21			157	1043.43	433.836		143	3415.84	33624.7			128	1024.61	44.4779		135	1517.2	132.4			148	1455.39	93.0789		166	1172.98	112.912			143	514.647	4.62687		151	2445.62	1275.5
	177	2605.41	1133.91		134	453.01	2291.54			158	1230.44	91.4474		144	2651.23	2533.52			130	816.612	-66.9539		137	-29.875	1425.25			149	599.368	66.2105		167	13879.2	1650.33			144	1835.38	160.815		153	1516.9	745.013
	178	952.513	315.924		135	609.219	1705.3			159	1357.6	307.318		145	785.521	1796.43			131	1128.78	52.075		138	39.4934	1379.77			150	999.289	-8.86842		168	5089.64	566			145	6733.88	1096.11		155	1305.46	76265.5
	179	1285.62	362.557		136	1129.96	21544			161	1168.05	141.045		146	632.005	6101.43			132	795.833	21		139	-36.3421	576.164			151	693.074	212.294		169	2161.61	235.355			146	673.237	752.96		157	13796.5	4499.7
	180	3264.35	848.825		137	497.684	1072.78			162	2161.83	300.415		147	913.614	791.109			134	14.7609	7.34783		140	-44.913	1497.62			152	7762.18	1020.29		171	1476.18	80.5625			147	4181.33	203.224		158	458.033	1846.77
	181	2488.1	466.031		138	2440.43	11502.7			164	1218.95	106.25		148	1543.57	568.421			135	515.375	-35.6797		141	1105.47	63.7059			153	4005.47	230.211		172	1525.47	440.76			148	7562.81	922.48		160	1211.81	232.574
	182	1249.23	484.019		140	990.391	48969.1			165	2	4.90909		149	998.984	10931.8			136	924.75	71.5833		142	667.842	96.8289			156	1742.81	52.4145		173	7114.26	2239.74			149	1265.65	143		161	332.77	6450.88
	183	1528.39	30.2171		141	387.6	3630.8			166	224.816	137.171		150	407.947	867.539			137	925.146	17.2361		143	-23.1406	1218.83			157	713.592	81.6184		174	11907.2	1364.99			150	1041.24	61.1111		163	387.685	7298.75
	184	1470.45	675.3		142	921.38	5139.24			167	139.322	1955.35		152	870.954	439.776			138	7.875	-4.25		144	813.967	86.6382			158	1128.18	85.8235		175	1054.59	115.299			151	1276.36	24		164	4854.84	3817.76
	185	2284.94	2513.31		143	130	11423.7			170	1051.84	296.591		153	2108.12	1825.3			139	1678.24	60.0329		145	-74.3542	2144.55			159	1010.28	78.2941		177	4629.13	1159.88			152	624.575	84.55		165	313.7	15832
	186	1961.71	1731.25		144	1132.2	4545.19			171	2234.78	799.059		154	336.12	4031.2			140	-32.5	21.15		146	728.172	0.09375			160	2720.39	409.352		178	1429.24	277.493			153	2779.91	17.3696		166	1076.35	322.882
	187	2260.08	728.021		145	3006.88	15655.7			172	140.444	1315.67		155	697.434	1865.47			141	1595.28	-8.90132		147	-41.2697	1573.07			162	1017.89	137.036		179	2567.58	479.957			154	7863.5	1572.22		167	663.529	191.5
	188	460.452	210.405		146	392.958	1478.15			173	2829.32	2588.27		157	1186.32	1610.68			142	485.338	-3.83824		148	3675.99	238.316			163	605.175	60.4875		182	1984.94	307.682			155	4768.77	643.021		168	891.25	-15.5
	189	4624.94	1744.1		147	933.577	4539.18			175	342.433	100.1		158	2162.24	28143.8			143	826.5	22		149	163.079	1142.87			164	1743.09	149.882		183	2173.86	268.205			156	1043.48	50.9625		169	2025.07	781.789
	190	2726.28	325.938		148	613.456	15467.6			176	1304.96	108.155		159	940.553	842.289			144	777.219	13.9625		151	-311.15	19331.7			168	879.961	28.7368		184	905.921	821.079			157	880.5	-11.1645		170	138.25	6626.62
	191	638.316	215.4		149	366.562	9585.01			177	1497.3	1792.4		161	624.412	460.147			145	790.75	-29		153	1122.04	70.0625			169	756.706	59.6765		186	928.458	115.625			158	1324.71	152.9		171	400.818	7214.53
	192	954.25	86466.5		150	805.732	17151.8			179	1313.03	484.066		162	871.219	925.687			146	935.697	0.0657895		154	457.667	144.667			170	1567.02	77.3676		187	1612.99	234.721			159	1420.49	145.375		172	2786.66	790.859
	193	194.727	143.364		151	1402.72	4031.78			180	3306.22	323.826		163	239.75	252.355			147	19.7143	-4.66071		155	400.32	8039.92			171	1540.71	128.869		188	5841.58	32.7222			160	5040.9	328.021		173	2268.58	913.789
	194	1809.87	629.175		152	2039.29	30146.5			182	3219.85	1090.85		164	320.55	343.35			148	654.375	89.1562		156	1610.58	83.3684			172	1264.5	14.5		189	1072.86	241.724			161	905.447	588.105		174	513.25	1801.62
	195	2518.33	75.925		153	1167.48	5275.92			183	557.819	201.319		165	317.833	538.465			149	878.862	16.875		159	-0.727273	1138			173	1353.41	163.765		191	1772.89	217.339			162	16847	1631.01		176	768.471	157.941
	196	1356.08	1249.78		154	577.969	23394.9			184	165.62	2039.53		166	596.875	544.937			151	669	19.4444		161	-18	1187.78			174	930.92	1434.48		193	1331.96	9262.83			163	1017.16	24.3452		177	9485.21	5911.71
	197	2145	165.55		155	2095.82	11319.8			185	369.651	381.059		167	359.98	2869.68			152	470.456	65.5588		162	3903.77	104.761			175	1496.86	159.286		194	1254.89	409.658			165	4686.51	314.54		178	1381.96	317.546
	199	1580.25	2297.5		156	3718.17	62026.7			186	134.158	1288.86		168	811.974	555.432			153	889.844	-17.3281		163	-7.8	7398			176	1700.67	131.563		195	1608.86	3437.22			166	4901.19	324.14		180	1083.84	649.105
	200	1030.06	295.017		157	844.236	13497.1			187	1651.39	695.434		169	2014.21	1978.19			154	698.806	15.5625		164	-19	2551.5			177	1068.14	35.0263		196	562.603	102.926			167	7760.09	516.667		181	8301.43	5892.62
	202	30.7391	19.75		158	632.646	1177.51			188	1992.73	227.905		170	255.58	1809.49			155	920.926	52.3487		165	1701.22	46.5139			178	2204.39	201.487		197	1888.75	247.375			168	865.444	265.917		182	5521.42	1396.58
	205	789.112	523.031		159	1564.61	7067.01			189	2101.4	461.2		171	829.171	668.888			156	734.075	8.775		166	-93.9167	951.625			179	6814.16	666.63		198	7137.81	1607.79			169	1457.18	-80.5		183	5141.96	2462.92
	206	1392.59	306.205		160	1004.43	2270.06			190	950.105	251.632		172	359.789	228.632			157	1782.34	32.5		167	-22.7826	657.435			180	1349.9	508.743		199	7958.67	966.222			170	1401.89	60.6875		184	772.237	550.487
	207	1762.17	367.167		161	1159.16	6465.96			192	630.214	135.786		173	2426.99	5446.99			158	759.213	-1.88971		168	108.121	9051.02			181	391.583	107.188		200	1167.25	319.75			171	2212.49	310.197		185	5108	1437.69
	210	735.83	176.727		162	2667.16	15262.7			193	764.958	77.625		174	1313.47	1671.68			159	85.9625	-8.3		169	-67.8696	2157.52			182	888.786	39.1627		202	11805	1603.66			172	1100.78	106.861		186	5600.12	5446.62
	212	1883.98	2327.61		163	1585.86	8035.62			194	162.342	1862.72		175	161.792	1629.44			160	747.474	2.94737		170	-60.0921	1148.68			183	1508.72	65.2254		203	3029.79	481.158			173	1401.29	-41.4337		187	2679.53	695.449
	213	3558.58	371.87		164	1988.23	5788.61			195	557.25	207.042		176	177.434	2455.75			161	214.375	-30.125		171	-25.9706	853.301			184	5043.67	235.865		205	395.658	2612.13			174	1525.06	32.4118		188	1692.66	236.029
	214	249.74	20978.1		165	832.957	3276.63			196	508.076	223.361		177	330.763	179.158			162	87	3.84615		172	660.211	95.6447			185	1317.06	178.625		206	884.279	216.397			175	2272.45	275.493		190	1208.71	775.816
	216	520.487	15117		166	1439.5	4252.21			197	2013.81	287.953		178	216.283	2373.78			163	1147.15	21.3542		173	902.222	5			186	2248.65	153.471		208	1729.24	49.5682			176	1651.42	250.303		191	6168.83	1472.12
	217	638.474	222.053		167	466.188	44081.8			198	607.301	52.1176		180	167.579	1972.95			164	736	15.25		174	-34.3947	1389.53			187	1024.42	36.4583		210	749.456	37.9485			178	24356.2	1162.92		194	434.153	423.972
	218	477.688	886.162		168	951.865	5882.76			200	334.5	225.559		181	646.394	5595.4			165	1197.43	-22.7105		175	-11.7895	1075.89			188	863.031	248.937		211	948.406	142.656			179	1054.54	-48.0263		195	64.9444	8168.19
	221	985.094	336.156		169	4563.91	22905.3			201	1086.26	127.579		183	307.68	2438.71			166	863.36	65.6842		177	-25.6154	4300.62			189	2323.2	243.6		212	3547.9	380.35			180	3088.51	250.802		196	856.842	1132.7
	223	2773.88	4488.2		170	3698.72	14440.1			202	108.48	1141.86		184	327.412	329.272			167	892.127	26.625		178	191.571	4785.27			190	2585.94	67.3618		213	832.315	179.435			181	4043.44	260.063		197	742.824	259.412
	224	2411.97	30385		171	2957.77	12765.1			203	1195.94	434.688		185	602.684	504.632			168	1932.56	61.0139		179	469.059	207.816			191	1707.21	200.691		214	1246.33	139.222			182	961.417	66.0833		198	1357.41	1748.71
	225	-68	2260.41		172	457.875	1401.77			204	2378.34	181.934		186	314.426	441.243			170	1074.43	43.2829		180	-84.81	5039.64			192	5632.61	189.105		215	3625.22	591.522			183	1482.98	217.138		199	3862.16	5072.42
	226	1788.38	262.355		173	1383.62	52742.8			206	722.047	753.734		187	224.175	2786.53			171	1317.3	41.8		181	26.1667	765.875			193	699.583	76.3333		216	705.303	86.2105			184	1754.12	76.4706		200	790.219	1471.52
	227	3421.85	577.72		174	1168.94	4579.17			207	170.457	1780.62		188	1074.26	606.632			172	696.316	1.05263		182	19.1691	724.184			195	1267.62	74.0187		217	801.512	855.425			185	4179	31.5469		201	5779.86	3911.31
	228	3045	785.846		175	1928.61	1812.77			208	2926.21	4048.32		190	520.092	872.368			173	727.36	-78.4044		183	1262.58	298.917			196	2666.23	287.114		218	845.4	15053.7			186	2674.31	102.08		202	1050.1	463.139
	230	2057.58	700.973		176	943.296	15928.3			209	1429.22	907.487		191	634.417	516.75			174	1067.53	-15.7279		184	-115.302	3202.69			197	1089.64	84.1184		219	11450.2	1861.44			187	1418.89	111		203	395.971	9791.25
	231	1782.17	1079.81		177	467.061	35791.5			211	1649.39	1245.74		193	390.333	3989.32			175	632.235	-25.4118		185	-91.7812	1881.75			198	1338.45	92.46		220	845.125	-136.016			188	6092.52	520.077		204	1467.5	1152.45
	232	2662.03	721.618		178	1198.54	2348.25			212	2192.41	616.703		195	359.87	3384.34			176	941.162	35.5263		186	-66.1354	1684.57			200	1697.29	140.645		222	766.81	209.619			189	1668.29	-90.6145		205	4859.97	5177.87
	233	4626.5	2617.95		179	733.412	4098.89			214	2001.12	590.48		196	600.049	472.153			177	1196.24	-43.7386		187	264.818	398.364			201	4637.89	625.698		224	2071.45	342.511			190	695.176	289.382		206	450.447	680.605
	234	3205.57	521.453		180	1876.66	17474.6			216	638.763	317.553		197	925.868	405.092			178	451.95	36.1062		188	-35.6591	839.909			203	1911.68	261.207		226	1364.19	173.562			191	3355.27	651.231		207	3221.5	1179
	235	2268.08	259.544		181	236.49	24639.7			217	579.421	549.053		198	321.3	2480.28			179	478.8	37.1		189	-107.105	1929.16			204	586.25	115.779		227	2207.83	118.592			192	14909.6	1538.12		208	4548.37	1703.44
	236	1455.23	347.273		182	3700.84	45119.9			218	908.821	72.2857		200	457.658	859.118			180	1976.39	29.7829		190	756.395	44.5526			205	1136.81	42.8611		229	491.392	11418.3			193	646.338	-272.894		209	1201.18	438.289
	237	700.511	517.913		183	486.076	25429.1			219	2583.07	612.536		201	536.066	367.105			181	1041.67	30.3333		191	1608.12	125.708			206	3095.38	969.191		230	1029.33	298.778			194	4741.02	30531.6		210	80.88	6744.04
	238	2773.19	1094.81		184	920.4	6447			220	221.25	27.3015		202	1522.12	3121.69			182	996.958	25.125		192	16.4868	558.961			207	1843.84	50.7895		231	915.447	119.645			195	772.25	89.125		211	770.779	55.2941
	239	1647.49	2869.29		185	1530.65	6683.14			221	912.286	235.333		203	100.684	1262.88			183	30.1279	2.20455		193	-28.913	763.304			209	2147.66	135.711		233	2497.16	831.895			196	3721.37	2261.75		212	1412.28	469.068
	240	534.214	823.982		186	601.5	2377.58			222	1222.66	496.711		204	2221.57	2053.74			184	706.382	-11.7647		194	6.46528	382.451			210	4483.99	411.592		234	2460.62	3508.25			197	2226.2	449.434		214	6301.07	1971.43
	241	468.77	231.204		187	954.465	5227.2			223	3338.69	3580.27		205	2070.23	1586.19			185	1022.75	5		195	39.7059	-9.46154			211	1151.81	23.6667		236	1982	788			199	7944.44	592.019		215	1444.7	158.84
	242	348.76	12629.6		188	662.42	4559.55			224	729.368	454.382		206	322.6	3546.48			186	815.854	90.5625		197	636.75	10.625			212	2545.22	34.5855		237	2458.09	542.909			200	5701.96	239.979		216	766.625	432
	243	963.092	389.747		189	2244.72	15251.9			225	1683.05	798.905		207	1384.25	4208.02			187	805	-24		198	3219.74	245.698			213	6031.91	592.725		239	9999.5	1289.31			201	5429.28	389.914		217	213.576	8362.18
	244	445.735	115.5		190	331.963	18958.6			226	298.958	552.222		208	400.562	4932.56			188	543.975	-41.2063		199	-26.2105	853.112			214	2376.27	223.425		240	433.467	2792.24			202	293.835	7756.3		218	1401.95	226.445
	245	1039.2	382.825		191	533.618	537.454			227	3982.83	2194.17		209	1090.76	1443.25			189	2204.86	60.5789		200	-87.3967	6148.95			217	1293.99	62.7059		241	574.706	125.147			203	1272.65	-283.824		219	820.5	374.625
	247	2931.13	987.95		192	1261.19	3068.83			229	744.727	463.625		210	395.23	4513.98			190	392.853	-14.4191		201	33	-16.25			218	12672.6	1041.13		242	2622.41	2006.16			204	1215.09	147.324		220	150.528	8020.74
	248	1277.42	451.868		193	3328.66	26076.9			230	383.458	1853.08		211	956.789	1658.04			191	3707.55	48.9091		202	11.25	1098.33			219	153.769	15434		243	821.882	287.283			205	1515	214		221	1714.72	3390.18
	249	1254.23	31.1458		194	253.282	10264.8			231	774.13	351		213	589.592	6278.03			192	428.889	14.1111		203	497.319	41.625			220	984.513	107.875		244	1684.62	54.9583			206	960	86.4013		223	764.474	311.789
	250	371.25	11623.3		195	941.58	3257.99			232	901.04	693.04		214	1040.35	935.507			193	488.296	-3.25		204	1436.03	493.263			222	889.188	40.1016		245	963.98	180.461			207	136.357	-18.1333		224	3521.56	1276.25
	254	3562.26	2301.3		196	3402.85	85956			234	512.712	653.577		215	648.809	7236.83			194	888.545	51.0074		205	-19.3684	2417.22			225	1593.62	189.265		247	2050.17	38702.6			208	2085.38	0.87		225	4499.18	2584
	255	2116.48	1045.81		197	1045.65	7624.27			235	1154.08	297.842		216	382.409	135.466			195	1127.06	73.7647		207	-62.9674	1480.11			226	1012.94	-46.1338		248	1108.47	947.324			209	376.98	78.3618		226	2485.96	1026.39
	256	1412.35	1301.82		198	1223.5	5573.89			236	1992.42	248.053		217	347.521	199.854			196	665.434	-21.8289		208	1.92763	686.809			228	1631.58	108.033		249	3190.43	302.447			210	1307.65	109.137		228	2300.67	765.208
	257	1050.64	-176.727		199	3260	13859.9			237	755.744	388.08		218	643.469	6962.77			197	763.062	24.5		209	-59.6094	1737.04			229	923.906	88.5156		250	6741.95	977.615			211	652.724	89.7763		230	782.984	186.094
	258	1409.92	463.475		200	1436.99	3374.24			238	5400.36	2686.12		219	513.292	483.958			198	748	-4.82353		210	0.583333	968.861			230	1140.23	90.1103		252	3866.75	653.565			212	3237.79	372.755		231	756.572	581.5
	259	936.833	834.222		202	449.073	1182.53			239	2391.78	1183.58		221	657.233	6712.78			199	924.743	-87.5956		211	-18.8603	1033.65			231	793.762	-20.5		253	1093.91	168.67			213	1291.76	84.6667		232	958.438	251.75
	260	1343.39	720.667		203	676.481	2442.16			240	1028.88	96.3214		222	358.333	353.25			200	832.566	171.676		212	2823.3	105.678			232	20655.2	1396.72		254	536.759	16487.8			214	1551.12	67.2303		233	5009.11	2333.89
	261	1083.69	194.169		204	364.773	6232.87			241	140.75	1293.75		223	576.408	651.908			201	1564.1	-3.58333		213	20.3478	1307.52			233	1516.05	195.25		257	523.408	-3.84211			215	903.059	-30.1194		235	1121.86	22485.9
	262	2143.38	445.48		205	405.927	10401.8			242	2097.28	810.591		224	173.472	2037.4			202	852.854	20.2569		214	19.9375	1750.81			234	3599.6	129.04		258	1128.53	300.054			216	997.641	1.86719		236	761.528	142.181
	263	4131.67	2066.38		206	936.76	3070.9			243	1493.85	888.045		225	309.9	2541.1			203	687.606	24.4167		215	679.631	214.405			235	539.412	56.9412		259	1496.18	374.196			218	916.053	165.158		237	2203.09	2162.39
	264	1116.4	373.55		207	2130.45	9773.44			244	1084.96	282.539		226	94.1842	1379.53			204	161.2	-15.8		217	918	1089.28			236	519.158	47.3947		260	450.947	186.382			219	1304.74	179.789		238	2278.33	1238.33
	266	1309.29	39.9286		208	1619.46	4045.45			245	962.211	769.158		227	495.283	885.276			205	658.426	78.25		218	391.263	460			237	2208.14	174.333		261	1417.5	183.25			220	1245.16	39.6579		239	1309.5	341.125
	267	2318.25	446.7		209	1836.91	8317.99			246	1529.24	301.912		228	2090.62	20044.2			207	2.6125	-2.8625		219	-105.053	2190.84			239	3851.83	149.521		262	577.125	150.125			221	1040.82	40.7206		241	1042.46	217.776
	268	877.611	235.91		210	3000.18	86622.3			247	1249.3	20.9261		229	105.875	1397.25			208	1541.68	55.7368		220	660.467	104.267			240	583.507	757.171		263	2029.22	259.458			223	3213.22	360.549		242	2207.84	1755.56
	270	773.164	20806.4		211	1742.67	7865.2			248	716.842	75.6842		230	179.632	1974.58			209	1086.61	-49.8438		221	2.24342	812.888			241	2431.16	154.724		264	4343.74	1168.57			224	2719.65	158.409		243	2236.63	985.538
	271	2333.74	1730.72		212	1758.28	11643.2			249	524.211	106.329		232	391.816	225.789			210	1119.26	5.36842		222	26.0217	2282.78			242	2488.87	165.397		265	1061.26	57.3684			225	988.656	97.5375		246	2481.38	1897.59
	272	1009.62	601.531		213	990.505	5417.44			250	996.163	613.054		233	193.62	2163.11			211	35.2188	5.5875		223	141.812	2913			244	1120.79	-26.2059		266	593.5	15974			226	2630	152		247	991.526	452.5
	273	2764.43	492.4		214	407.038	12561.7			251	1108.7	664.487		234	151.049	1603.02			212	546.265	1.78676		224	-99.1979	3769.44			245	1106.62	116.271		270	1002	2375.34			227	1077.27	151.583		248	1955.03	731.724
	274	923.125	668.756		215	1032.88	13747.5			252	797.889	273.861		235	414.625	3418.71			214	1806.67	7		225	-30.0263	1191.45			246	777.026	106.25		271	2229.9	333.08			228	2158.14	109.434		249	1725.36	163.818
	275	2255.08	1097.54		216	1849.91	80272.9			253	197.5	260.25		236	522.425	1671.66			215	1434.48	16.3036		226	435.156	127.305			247	1156.74	1125.46		273	983.408	321.263			230	15686	2710.37		250	684.179	66.0714
	276	494.801	311.142		218	2901.46	21691.5			254	205	2103.58		238	1106.32	3255.27			216	1032.46	32.5789		227	-91.76	2843.57			248	3437.39	211.263		276	767.546	906.164			231	271.047	2935.42		251	1038	307.25
	277	682.713	229.762		219	2435.24	55435.9			255	3083.82	1908.76		239	346.893	213.679			217	74.28	4.56731		228	-25.6316	543.789			249	1464.8	155.781		277	444.963	85.6912			232	3634.16	605.915		252	273.25	229.75
	278	3733.45	2404.46		220	993.529	3545.86			257	595.658	77.6316		240	1147.96	696.849			218	71.2651	-7.89205		230	-49.4539	2104.99			250	5467.35	647.328		278	656.117	74.1833			234	1645.17	271.816		255	1076.67	428.931
	279	751.325	79.325		221	707.21	21752.7			258	86.8947	1160.08		241	2746.33	7329.34			219	1384.67	12.0556		231	5.47368	527.27			251	1188.72	39.625		279	155.318	18891.5			235	996	-1		256	395.031	112.55
	280	1161.3	430.8		222	1043.31	2779.95			261	996.687	340.687		242	2258.34	4660.3			220	912.417	-7.54167		232	1919.74	70.8261			253	759.308	20493.9		280	666.184	43.8421			237	2651.16	-3.055		260	1025	287.118
	281	1141.5	437.679		223	753.07	12369.1			264	140.25	1531.12		243	117.913	1376.83			221	674.118	0.588235		233	-103.572	3216.08			254	2409.45	1746.02		282	1965.62	243.921			238	1175.4	145.75		261	791.474	228.763
	282	1953.31	1328.33		224	839.715	5921.32			265	5690.47	3082.28		244	632.964	5155.32			222	962.974	6.01974		234	-70.1053	1994.58			255	1067.33	53.3333		283	6782.62	8115.95			239	1110	-29.25		262	1147.75	77.8732
	283	265.77	4528.66		225	693.94	16592.8			267	1307.86	68.7237		245	726.632	276.816			223	1145.2	7.97656		235	26.8696	1139.61			256	635.162	1146.47		285	1073.97	55.4167			240	5314.02	442.106		263	722.36	125.029
	284	2535.89	691.856		226	1397.39	39867.8			269	830.803	28.16		246	701.886	1433.47			224	2108.21	48		236	-69.2841	1450.45			257	5949	393.391		286	2992.12	-134.5			241	1216.55	47.7039		264	2343.26	460.443
	285	1566.19	1582.74		227	872.275	3712.37			270	145.421	1479.13		247	303.579	284.579			225	1057.9	-33.7014		237	-28.4211	729.579			259	1022	41.5882		287	1760.27	184.618			242	1905.89	211.158		265	3366.76	14618.7
	286	1915.61	2185.78		228	430.705	29949.7			273	943.929	199.357		248	549.612	6054.8			227	1125.32	40.1579		238	749.476	34.7619			260	2607.84	238.303		289	3386.33	1568.5			243	856.451	64.1597		266	701.204	125.316
	287	1949.66	560.812		229	521.3	1397.13			274	3003.7	5260.83		249	385.333	466.778			228	293.578	22.775		239	-32.7368	1992.16			261	1949.76	198.551		290	796.167	33.6667			244	947.822	101.059		268	1318.35	380.184
	288	1170.62	355.2		230	971.004	5980.08			275	1472.5	177		250	1893.28	1106.58			229	942.833	-26.9306		240	24.2396	1342.46			262	819.243	113.401		291	1794.41	190.114			246	1015.71	34.6625		269	633.605	237.428
	289	2170.44	78155.4		231	2744.89	11314.6			276	644.461	265.73		251	1521.58	1497.1			230	1574.36	3.84868		241	-13.25	1202.17			271	16273.1	1171.62		293	2650.37	92.2632			247	3559.12	163.109		270	291.148	109.67
	291	2231.18	1009.35		232	1587.48	10045.6			278	62.7171	1167.61		252	503.675	408.338			231	978.792	43.2738		242	-31.5263	2661.37			277	20815.4	1655.76		294	1600.78	162.257			248	863.853	50.2426		271	282.885	9354.33
	292	2317.79	6578.93		233	1375.33	5683.06			279	2729.48	563.82		253	3015.32	3139.78			232	1001.11	31.9868		243	1068.05	89.375			279	19456.4	1343.43		295	5304.96	2990.04			249	1848.28	364		272	569.58	413.716
	293	2457.44	797.563		234	652.05	3703.3			280	557.806	246.486		254	263.863	305.22			233	778	7.09375		244	51	826.887			281	46321.7	2939.17		296	8692.04	1458.05			250	89.23	7115.12		274	577	2301.41
	294	1050.19	619.052		235	304.854	26364.6			281	6394.47	3211.19		256	372.094	2564.36			234	1279.5	-25.4444		245	812.967	359.224			285	4824.72	459.76		298	4105.62	607.271			251	3230.75	226.938		275	1227.51	743.065
	296	2716.84	920.2		236	1665.69	6453.82			282	1192.74	234.974		257	375.415	2272.13			235	568.158	11.3158		246	213.859	137.508			286	1781.94	342		300	2451.45	324.812			252	316.276	2623.39		276	412.463	19862.4
	297	401.263	-367.04		237	2041.67	22605.1			284	80.9659	893.045		258	542.891	340.844			236	32.2727	0.456522		247	12.3333	949.667			287	3007.74	551.184		301	2328.74	567.665			254	3406.76	442.355		277	438.838	148.985
	298	5027.87	3760.78		238	659.016	2395.41			285	418.125	286.375		259	1240.8	1206.82			237	986.955	-5.36029		248	-2.10526	678.822			288	1040.2	93.9062		303	2936.88	422.75			255	1607.19	329.649		278	1130.6	791.556
	299	1552.96	890.14		239	750.938	1666.79			286	1056.04	651.13		260	456.667	227.333			238	100.618	1.17391		249	-32.5326	978.652			289	1516.53	137.156		304	2649.59	344.656			256	2375.1	163.224		279	2564.3	53.7391
	302	1786.85	1082.05		240	2010.54	60030.9			287	422.257	43.5417		262	155.306	1588.78			239	1011.39	41.8421		250	-28.0682	586.25			290	3484.68	412.173		306	1922.98	273.074			257	693.184	411.882		280	216.346	10503.9
	303	822.955	349.506		241	1258.26	4185.66			290	1724.06	196.526		263	555.434	2070.21			240	387.947	112.572		251	1330.42	36.4148			291	815.951	208.599		308	2475.53	269.368			258	1219.58	80.6953		282	3098.57	1743.45
	304	3720.15	1168.68		242	736.856	2398.99			291	590.493	119.309		264	272.569	124.396			241	575.773	17.5455		252	-51.9079	1622.84			292	926.75	-46		309	580.303	1466.34			259	18367.8	1141.86		283	796.734	231.984
	305	810.562	296.903		243	635.112	800.231			292	1995.42	704.263		265	499.182	401.409			242	555.842	-50.8421		253	2265.09	118.178			293	2656.7	26.25		310	1114.11	257.868			260	977.671	124.947		284	1201.12	2332.54
	306	595.075	812.537		244	2327.53	35642.7			293	374.672	761.766		266	419.316	4279.58			243	69.4	4.59821		254	-51.962	1156.22			294	842.375	127.938		311	1239.71	58.0526			262	895.294	112.176		285	1053.41	273.342
	308	517.13	14786.9		245	826.856	4072.54			294	1429.45	316.5		268	203.526	1862.26			244	65.175	-1.475		255	23.1053	1918.61			295	1727.89	57.2105		312	1865.75	315.079			263	3433.26	242.896		286	1722.96	498.838
	309	307.547	8973.83		246	2793.08	12460.6			296	373.822	239.026		269	1763.91	19926.5			245	209.286	-12.2692		256	1319.47	171.059			296	820.375	19.169		314	737.382	276.703			264	1423.86	28.6548		287	354.917	2035.12
	310	896.575	137.913		247	4660.42	11473.1			298	458.303	33.8947		270	769.5	292.25			246	866.066	22.5658		257	-294.981	4902.45			297	3895.91	68.4539		315	1098.08	420.796			265	2579.28	120.25		289	1501.55	428.737
	311	1972.08	702.375		248	1929.76	7125.3			300	136.039	1477.5		272	2319.27	2065.04			248	848.088	10.4118		258	1950.75	54.6974			299	1142.53	106.1		317	2010.5	225			267	1187.12	98.7059		290	4046.29	2987.58
	312	632.375	196.4		249	329.504	12614.6			301	1509.98	705.391		273	730.855	289.171			249	495.975	-39.2083		260	-34.8967	2049.44			301	965.75	30.3056		319	4750.84	13045			268	900.842	83.1579		291	478.676	16480.7
	315	548.656	13319.8		250	789.78	3806.82			302	442.526	208.474		274	1666.32	2997.14			250	1092.83	-45.6667		263	-10.1447	1027.77			302	3754.76	367.293		320	1406.95	267.638			269	2710.53	544.895		292	884.333	218.333
	316	1028.02	452.289		251	1086.21	8955.07			304	5699.63	1717.76		275	507.52	732.9			251	-2.425	-1		265	-6.42105	1123.34			305	805.6	-1.6		321	5022.85	686.576			270	1083.79	114.211		294	1069.77	31851.7
	318	912.1	1420.05		253	326.708	14221.2			305	1280.45	200.795		276	142.408	1218.61			252	758.406	1.59375		266	-32.2368	1217.55			306	1351.03	183.194		322	1001.34	1078.39			271	571.158	65.3224		295	556.886	1399.86
	319	1692.56	360.714		254	897.674	3368.22			306	2638.64	619.658		277	502.591	481.523			253	1014.19	7.74342		267	1082.38	14.1625			307	794.875	497.875		323	1804.25	403.587			272	2255.83	98.2763		296	993.303	197.737
	320	260.465	3395.45		255	727.384	32055.3			307	1225.03	291.912		278	593.08	4041.84			254	957.096	36.7721		268	-73.3026	780.454			308	2366.36	95.2857		324	1524.68	4675.4			274	1748.34	214.495		297	1298.52	25986.5
	321	3208.31	1685.41		256	1994.35	5426.62			308	7847.78	2780.02		279	201.164	1697.46			255	637.934	-13.1711		271	654.703	43.5469			310	4304.9	351.4		327	1271.86	141.829			275	886.569	96.943		298	899.417	414.722
	322	2028.09	719.982		257	1400.85	19742.7			309	1947.18	1909.53		283	326.474	141.638			256	228.07	9.36364		274	-97.6667	2883.17			311	1289.29	89.4583		328	4510.7	862.211			276	3815.58	460.829		300	477.571	1662.91
	323	44.6667	12788.7		258	863.295	31185.7			311	492.507	279.708		284	587.019	6249.12			257	131.718	17.9625		275	-75.6447	2862.7			312	271.2	137		330	4921.89	664.053			277	4436.49	296.374		301	856.288	244.525
	324	911.667	4236.67		259	1163.88	8811.55			312	991.595	524.955		286	242.855	185.026			258	486.094	-1.96875		278	-78.7566	774.283			313	1816.07	209.682		331	842.618	31.5526			278	5584.54	611.296		303	805.316	190.947
	326	913.75	470		260	462.343	24957.1			313	426.395	148.099		287	127.316	1565.47			260	806.329	-16.7895		279	-39	1404.75			314	6330.68	788.125		333	7003.3	484.8			279	4350.91	359.5		304	3711.88	2181.7
	327	1966	165		262	2609.86	6408.96			316	2963.18	3362.96		288	350.25	2642.44			261	26.3	5.6		280	359.796	609.625			315	2014.48	245.167		334	6494.61	1417.84			280	7047	329.5		305	888.816	186.763
	328	723	594.739		263	1064.42	11815.7			317	145.243	1804.56		289	675.25	6715.75			262	181.9	-4.1		281	3946.85	204.836			317	1276.93	-21.3382		335	2304.57	288.818			281	2182.46	319.425		306	1624.07	383.75
	329	2122.68	389.243		264	1025.54	5534.24			318	1468.46	201.31		290	319.233	499.335			263	424.735	-36.1324		284	640.945	-20.1562			319	940.25	61.25		336	4124.28	-146.687			282	7543.48	904.013		307	556.852	188.023
	330	1830.28	437.788		265	4700.56	25274.2			319	1371.09	1200.06		291	237.25	2786.82			264	6817.75	328.444		285	-73.7632	1331.95			320	2433.64	123.16		338	3901.04	408.522			283	1591.26	112.59		308	1021.6	351.642
	332	178.292	5752.06		266	1540.66	2002.24			321	662.842	91.9211		292	423.417	3605.5			265	1853.51	70.5398		286	-139.969	4522.35			321	592.969	-66.3125		339	3540.43	346.275			284	1764.16	-12.0435		309	3470.65	937.125
	333	2151.03	862.385		267	597.688	14562.2			323	309.434	148.362		293	614.539	732.329			266	0	0		287	20.7772	844.978			322	1378.85	363.796		340	1401.36	60.8897			285	927.167	108.611		310	1211.33	663
	334	2887.05	816.898		268	900.543	3508.03			324	839.098	41.2576		294	397.914	200.803			267	2399.65	88.0132		288	-33.1382	1171.86			323	7729.82	386.645		343	708.565	21376			286	2028.72	991.908		311	265.115	5380.25
	337	1734.66	2406.28		269	2892.75	41127.9			325	1687.86	827.118		297	2091.34	1929.62			268	455.811	12.0588		289	-2	660.947			324	2716.29	156.553		344	1848.52	2645.04			287	1639.13	172.132		313	791.663	171.709
	339	787.75	410.687		271	3918.05	19337.7			326	1296.92	709.855		298	318.547	3572.23			269	1018.34	15.5547		290	667.684	300.053			325	858.266	71.0547		345	5128.75	558.25			288	871.779	472.353		314	884.972	523.444
	340	2822	1047.2		272	70.3	11787.1			329	910.42	211.852		299	2649.66	13822.9			270	852.513	-21.0526		291	-9.13021	1966.26			327	13182.2	2725.78		346	1625.28	2359.91			289	1117.09	-34.7437		315	1618.78	110.761
	341	2467.81	1464.93		273	876.719	4315.4			330	4984.75	1794.4		300	785.619	567.19			271	567.474	2.50658		292	-35.1806	1167.96			328	3977.75	260.898		347	5349.67	1434.33			290	608.206	13.3092		316	2338.73	23.6364
	342	1346.6	648.55		274	1164.71	2884.11			333	1593.53	1984.88		304	1300.64	7714.14			272	847.357	-5.11111		293	-97.1875	2801.88			329	813.236	192		348	623.625	119.562			291	1674.27	748.017		317	82.7188	5515.99
	343	2849.43	1665.03		275	684.036	4339.96			334	491.088	241.706		305	770	794.667			273	1352.18	21.462		294	-65.3125	3673.73			330	10145.9	611.75		349	1218.85	238.773			292	13512.8	455.34		318	1530.12	2587.34
	344	4268.86	1165.08		276	703.575	3503.63			335	1331.75	385.875		307	899.579	893.191			274	545.023	-6.15441		295	2462.62	70.75			331	14711.7	683.818		351	5041.34	607.5			293	2222.32	94.9896		319	1290.4	1956.41
	345	698.091	177.069		277	-506.573	39274.5			336	2952.29	469.711		308	351.269	3663.25			275	441.582	2.25694		296	-209.889	4878.05			333	641.434	6.65789		353	755.285	14267.2			294	3007.96	119.625		320	327.5	13943
	346	879.512	626.35		279	118.134	9821.14			337	695.625	121.328		309	1853.2	2316.72			276	1041.8	-35.3421		297	-66.4934	2296.28			334	4229.25	314.118		354	1942.55	207.818			295	491.972	403.869		322	1782.75	465.474
	347	2068.07	685.759		280	1317.38	12543.9			338	648.833	171.16		310	212.75	2767.76			277	2072.05	-6.90789		298	-22.4737	1236.55			336	923.618	91.0556		355	955.94	203.643			296	933.428	36.4605		323	2147.1	591.307
	348	627.239	250.378		281	458.8	11949.2			339	2072.64	2597.49		311	618.875	551.019			278	49.9231	-4.9375		299	-43.7632	1612.05			338	664.062	39.8125		356	868.132	5412.08			298	4205.5	761.25		324	924.125	1311.25
	349	-111.992	16585.8		282	336.153	31329.9			340	1097.2	757.164		312	795.673	8186.7			279	1319	-11.8235		300	928.786	236.286			339	794.217	312.4		357	1971.54	658.357			299	1259.66	140.763		325	880.679	283.659
	350	607.737	-20.4867		283	1375.57	7873.5			341	270	160.15		313	443.286	350.714			280	722	18.1765		301	-88.901	1537.48			340	8219.85	255.674		358	821.77	137.645			300	2146.82	35.42		326	473.775	17720.9
	351	734.441	136.471		284	1059.11	9756.4			342	926.079	89.7895		315	123	1504.22			281	17.5	-20.05		302	30.5	7478.72			342	1347.12	57.1908		359	2286.7	455.284			301	17275.2	4201.42		327	489.222	130.583
	352	88.4485	13228.4		285	1195.07	10624.8			343	1113.18	394		316	581.658	380.289			282	623.284	31.9559		303	-22.0598	2709.93			344	7113.5	540.5		360	1143.4	43720.5			302	871.989	2841.18		329	492.75	1070.62
	353	3572.67	1210.23		286	2779.91	8053.47			346	277.204	1917		318	154.947	1585.55			283	499.3	-39.05		304	-41.9408	1361.99			345	772.375	98.25		361	1167.95	-48.0526			303	1327.1	102.789		330	164.667	13787.6
	354	4890.21	3126.07		287	1622.21	24198.1			347	145.145	1413.11		319	397.711	3747.81			284	822.108	5.23125		305	-58	1814.67			346	2306.67	258.222		363	5343.66	1009.24			304	305.704	461.789		331	1119.18	531.118
	355	1695.47	724.211		288	827.328	5410.92			348	179.842	1479.29		320	579.8	5099.6			285	128.117	7.39844		306	269.579	817.217			347	2988.47	200.493		364	9190.06	7844.69			305	1194.61	126.838		332	361.202	8561.85
	356	441.214	22642.6		289	3891.78	24212.2			351	359.667	139.333		321	506.542	272.16			286	1242.33	9.49457		307	3.07639	848.028			348	1469.94	163.412		365	707.521	82.4792			306	5069.79	311.632		333	844.289	391.253
	357	3510.36	1692.58		290	1821.86	1696.59			352	4413.45	1028.45		322	3242.32	31373.3			287	909.694	1.15278		309	675.891	37.3906			349	2000.82	8.48529		366	844.75	29			309	1922.97	4078.6		334	923.654	18731.1
	358	813.813	821.782		291	2383.98	9224.25			353	660.985	139.706		324	239.539	2382.21			288	966.176	-13.3529		310	2059.17	125.98			350	1280.88	138		367	3115.88	378.09			310	2433.52	107.542		335	348.731	14014.8
	359	986.894	2538.84		292	580.45	10805.4			355	379.417	204.25		325	97.25	947.75			289	954.449	-32.1912		311	63.7917	1201.67			351	3897.75	262.039		368	2613.13	404.391			311	4040.74	240.289		336	555.75	117.25
	360	3225.47	2205.62		293	1692.78	17060.4			356	1678.33	173		326	343.778	157.222			290	1883.43	13.8261		312	20.0395	887.829			352	2237.32	86.5833		369	3359.95	415.054			312	718.395	137.092		337	2061.34	629.292
	361	931.071	-10.4096		294	901.175	2917.23			357	107.909	1278.23		327	336.245	3486.99			291	447.062	11.25		313	-21.3824	821.765			353	3499.85	236.639		370	2479.03	6609.01			313	6990.28	350.263		339	871.109	648.315
	362	763.294	70.7206		295	93.375	11968.1			359	335.614	110.5		328	2897.01	1764.71			292	1433.37	-72.0469		314	311.23	81.4342			354	1008.04	26.5		371	468.314	24408			314	5207.08	553.8		340	312.352	10779.8
	363	639.438	944.312		297	1029.49	7483.5			362	101.539	1550.59		329	555.75	436.5			293	549.91	23.25		315	65.7368	1214.93			356	15221.8	1065.79		372	5953.38	1088.02			316	3195.26	-123.239		341	506.111	163.646
	364	2337.17	58824.3		299	599.312	2026.73			363	2378.2	2509.8		332	332.25	240.456			294	55.4914	-5.625		317	-62.9934	2642.57			357	16541.7	1120.5		373	5414.79	756.719			317	3341.25	250.566		342	1249.3	227.566
	366	684.813	686.562		300	2234.47	72358			364	206.328	239.547		333	166.48	1556.63			295	1992.98	59.8478		318	3767.67	185.889			359	11584.3	764.4		375	1011.82	192.329			319	1622.55	1044.95		343	1306.15	506.639
	367	1391.36	16737.7		301	4069.82	11692.8			365	2990.54	1349.7		334	526.111	5232.48			296	907.316	18		320	1754.88	92.1875			360	13063.9	943.737		377	2387.73	8279.86			320	1471.64	103.045		345	1418.03	449.27
	368	1086.04	281.58		303	1070.62	4713.24			366	702.75	260.5		336	256.75	1014.75			297	-10.0658	-23.1875		321	39.4886	1134.9			361	1241.66	40.6447		379	826.562	669.5			321	1478.83	156.559		346	1719.21	630.522
	369	1459.65	698.523		304	667.521	1923.65			367	708.556	2559.8		337	1170.88	1443.24			298	951.75	-11.2237		322	6.44444	1075.11			362	870.438	36.5		380	2363.33	30.5208			322	656.042	66.6597		347	1318	229.125
	370	1561.96	2309.12		305	1993.48	12717.7			369	103.333	1232.35		339	186.703	2213.49			299	642.325	12.2		323	-96.288	1559.95			363	1315.53	127.375		381	1587.06	114.896			323	1845.8	231.632		348	562.82	8376.09
	371	1197.5	19777.1		306	1312.25	38610.5			370	4206.28	884.711		340	243.888	273.395			300	575.494	-20.3438		324	-27.9079	972.164			364	1274.15	-9.50694		382	1002.93	138.645			324	1600.53	89.5789		350	692.632	235.27
	372	2055	735.848		307	131.305	15932			371	1970.46	601.125		341	326.125	473			301	1115.29	-30.6905		325	-41.7	2141.45			365	1732.45	188.355		383	8784.6	1618.5			325	212.885	5658.95		351	8601.88	2800.12
	373	1440.97	288.675		309	895	5141			373	576.727	511.966		342	574.92	861.14			302	533	15.5147		326	32.0978	1302.63			366	691.299	83.8125		384	1322.05	1921.92			326	10662.6	647.593		352	3535.79	1823.53
	377	772.985	52186.9		310	2265.96	7236.08			374	137.868	2035.79		343	282.76	2168.25			304	2060.83	-44.5238		327	-48	2560.48			367	5187	605.667		385	1974.42	63.0329			328	6311.95	557.731		353	740.111	13584.8
	378	1143.9	375.7		311	4603.76	16710.1			375	1297.76	385.316		344	239.06	2859.94			305	602.025	-3.55		328	-129.918	2940.75			368	1289.95	43.3092		388	1081.99	143.146			329	1960.51	175.868		354	1311.88	580.447
	380	417.087	479.522		312	1307.5	5642			376	695.089	231.321		345	341.333	275.167			306	765.271	18.0417		329	4.29167	776.458			369	1370.01	69.0461		389	2651.97	774.42			330	1887.47	181.158		355	1097.76	262.994
	381	1098.99	5178.28		313	1524.6	8726.12			377	2509.68	628.684		346	440.717	599.011			307	41.608	-4.38636		330	2217.22	163.825			370	2724.06	241.921		390	2740.56	443.83			331	670.789	1555.21		357	685.86	225.338
	382	2326.35	111.043		314	1194.75	4923.2			378	3112.09	661.342		347	515.465	5323.85			308	169.031	19.9038		331	-108.329	3086.36			372	1294.25	-17.875		391	638.742	29806.2			333	1171.79	18.0329		359	910.737	368.941
	383	-100.995	11178.6		315	739.089	9763.68			379	2065.51	699.81		348	93.5592	1090.82			309	924.9	4.15		332	-65.1667	1829.62			373	9995.46	2421.11		393	2649.05	514.105			334	1238.58	34.5588		360	792.875	352.708
	384	1647.23	1943.83		316	890.385	3908.97			380	148.132	1812.29		349	372.167	2830			310	1359.72	-3.99342		333	-43.1136	1081.02			374	3294.69	81.5833		394	12995.8	2176.08			335	1765.67	512.208		362	3939.22	1312.03
	385	4355.25	1199.5		317	243.536	12945.5			381	898.737	319.579		350	284.921	190.987			311	9.425	11.6125		334	-101.539	3828.68			375	16138	947.64		395	274.102	13662.1			336	1044.47	31.0882		364	536.125	19443.9
	386	2912.68	4685.32		318	1603.33	9956.76			382	1265.5	117		351	335.273	257.58			312	370.75	11.475		335	773.772	192.941			376	3787.29	327.104		396	2228.36	1541.48			337	3760.2	250.822		365	3025	1268
	387	499.708	312.833		319	1359.22	6247.12			383	1076.11	261.111		352	1134.11	11706.4			313	13.6761	-5.04545		336	10.1103	1114.12			377	620.397	267.037		397	2407.63	234.034			338	2116.54	2637.62		366	896.631	323.821
	388	1116.1	427.625		320	669.808	2918.18			385	3631.01	884.604		353	773.794	344.324			314	1750.7	9.21875		337	-93.0192	3730.45			378	2767.16	154.368		399	2217.05	430.013			339	2437	109.091		367	2262.87	1653.58
	390	4151.77	1494.11		321	729.977	3235.55			386	1531.12	1072.21		354	229.053	2927.32			315	646.559	12.7039		338	18.5526	1111.11			380	668.515	71.5368		400	1027.68	254.053			340	1531.32	227.474		370	798.053	533.066
	391	1767.48	8714.34		322	1017.96	1209.21			387	1990.97	296.219		355	437.84	4725.14			316	16.8542	4.875		339	1332.14	183.303			381	1097.78	1786.02		401	11635.4	1833.39			341	6618.74	305.787		371	6764.96	6137.98
	392	3504.12	702.5		323	1327.37	5578.08			388	2633.07	506.586		356	1232.4	1472.6			317	635.562	11.7812		340	-41.5066	962.697			382	6302.52	329.891		402	1475.88	519.222			342	605.163	5427.3		372	137.8	5375.24
	393	1881	2003.5		324	2011.89	33203.6			390	2456.92	770.278		357	1721.02	3491.17			318	612.2	29.5556		341	-105.781	2577.47			383	1303.24	36.5074		403	1986.36	251.725			343	739.781	-1.59375		373	757.861	226.417
	394	3060.25	990		325	2698.21	20854.3			391	1458.22	418.957		358	486.855	258.895			319	951.5	-7		342	592.353	46.5294			384	18025	2441.5		405	2224.46	54939.1			345	2540.12	7.5		374	1369.45	479.875
	396	581.938	17294.4		326	1531.82	6448.24			392	350.757	676.083		359	969.271	1075.52			320	175.125	-18.4565		344	-147.75	4721.75			385	1526.89	168.36		407	1328.46	664.605			346	1031.86	127.75		377	327.36	4361.9
	397	544.612	1108.04		327	4441.07	21266.6			393	1871.04	826.667		360	412.489	180.795			321	651.831	-42.6985		345	2.73913	1039.91			386	827.222	22.7778		408	6070.08	50.0288			347	2222.28	21.04		378	1561.28	434.737
	398	408.07	170.578		328	712.75	2528.61			394	491	1135.16		361	1190.5	1533.62			322	729.572	36.0197		346	963.604	14.5417			389	748.593	56.1776		411	829.5	34			348	1177.14	165.143		379	897.875	262.625
	399	2067.65	362.2		329	1015.12	63699.9			396	389.61	126.596		362	187.771	2429.95			323	771.562	88.6458		347	-134.987	3416.91			390	5119.14	315.579		412	496.013	241.151			349	6031.37	1342.48		383	1946.76	22473.5
	400	697.95	73.85		330	1676.44	8429.43			398	589.178	695.099		363	288.835	2864.14			324	1352.37	-8.5		349	-23.8816	1008.62			391	1613.39	172.395		414	831.712	8175.1			350	916.026	141.72		385	766.195	28475.9
	401	2196.05	38551.5		331	2016.5	30203.6			399	2376.12	333.125		364	1579.55	1942.9			325	2753.13	-42.6053		350	5.13158	2368.85			392	1411.35	142.706		416	1092.54	6490.51			351	1844.4	6116.96		386	448.711	94.3421
	402	1658.38	158.55		332	1256.04	5631.4			401	471.929	346.429		365	2237.5	16362.5			326	796.4	43.0526		351	4.21053	2965.5			394	5284.72	52.0521		417	1156.84	402.178			352	993.525	235.4		387	396.893	85.759
	403	1254.98	553.533		333	53.6765	100039			403	322.625	750.058		366	130.043	1768.18			327	301.875	30.625		352	1696.7	72.7391			395	1029.94	390.853		418	1006.94	161.222			353	2042.41	206.918		388	869	1290.68
	405	832.775	12256.9		334	1630.19	5187.95			404	1833	1411		367	422.388	234.737			328	1497.99	-79.0139		353	-13.6053	1522.79			396	15837.7	813.495		420	304.075	7724.55			355	1664.5	224.961		389	1309.33	155.238
	407	978.993	317.289		335	1741.4	4961.58			405	770.053	1534.26		368	422.125	425.25			330	-22.675	0.15		354	18.0132	841.829			397	4979.08	141.903		422	4300.38	723.042			356	1898.05	388.38		390	1025.05	191.81
	408	1865.2	379.913		336	823.05	5151.94			406	2326.8	846.615		369	1728.07	2095.34			331	611.667	-47		355	161.833	1256.46			398	6058.16	631.316		423	627.695	115.523			357	1558.39	88.0595		391	8274.14	1725.61
	409	2914.34	1027.48		337	518.05	2070.33			407	113.062	1205.69		370	246.75	3910.65			332	912.296	-19.6447		356	1175.84	91.1118			400	877.333	-18.2222		425	3327.36	344.417			358	1011.22	72.7059		393	812.562	283.639
	410	585.849	162.5		338	1935.25	12577			409	75.1985	1216.97		371	1364.67	1101.33			333	1051.01	21.4342		357	-44.625	910.958			401	656.618	32.0147		426	2717.53	613.944			359	276.188	46.125		394	195.368	5838.74
	411	2853.53	1556.09		339	1911.83	4333.24			411	854.474	324.316		373	443.606	4841.9			334	597.324	-73.8162		358	758.515	71.8971			402	4210.59	108.49		427	1008.24	19287.4			361	5003.75	570.173		395	533.829	161.32
	412	3786.38	2852.94		340	1294.59	5797.61			413	1151.87	711.473		374	1813.68	1894.87			335	445.656	11.7188		359	167.31	3757.33			403	744.73	170.77		428	1977.88	428.704			363	1048.81	-155.43		396	451.778	307.604
	413	2294.2	4872.2		341	3479.9	3125			414	949.679	569.464		375	310.237	439.632			336	1617.03	42.5724		360	20.6842	1384.99			405	1255.4	437.238		429	943.257	1777.72			364	8303.52	736.865		399	802.273	799.591
	414	2272.4	366.025		342	3198.01	8405.21			416	74.6974	1154.38		376	229.625	2215.88			337	720.32	-2.64844		363	-458.516	13920.1			406	1633.7	90.0658		430	762.237	427.184			365	736.625	89.2676		400	1318.42	500.12
	415	4063.33	670.579		343	2150.42	919.049			418	973.762	1012.33		377	1664.44	858.605			338	364.338	24.9412		364	-45.875	2728.05			407	1586.24	57.9653		431	5137.79	342.31			366	1089.35	-108.059		403	166.063	5384.97
	416	2019.97	720.092		344	972.375	27774.8			419	347.612	24.3813		380	561.324	318.574			339	36.4091	2.625		366	587.853	21.4706			408	969.111	12.3056		433	2063.69	406			367	1680.19	142.056		404	327.293	7358.02
	417	2167.96	2259.73		345	1305.08	17443.2			420	121.158	1523.53		381	1998.39	3282.68			340	810.554	-16.0595		368	-47.2344	1880.46			410	1228.11	105.225		434	989.047	67.4453			368	2304.39	881.911		405	606.275	376.076
	418	4258.76	2326.62		346	751.159	7445.41			421	188.5	1658.12		382	1539.97	1636.76			341	123.075	-5.9875		369	-31.6513	1742.29			411	1287.38	171.875		435	606.447	166.737			370	126.83	10538.5		406	3266.81	1184.09
	420	995.281	198.156		347	557.423	18104.8			422	108.417	1412.9		383	1217.68	993.237			342	594.4	33.1053		370	1132.92	270.263			413	797.493	22.6184		436	8072.51	1558.93			371	1232.42	142.8		407	1124.83	315.576
	421	3752.13	700.245		348	3768.1	15318.1			424	961.961	289.25		384	610.605	555.026			343	88.725	-1.2125		371	-35.5263	1101.26			414	6338.67	370.079		437	466.625	160.562			373	1989.34	51.3487		408	274.885	8117.72
	422	422.455	5560.27		349	461.239	4925.92			425	1550.5	1479.25		385	883.029	4257.86			344	1370.92	4.47368		372	1005.97	16.9474			415	3037.49	409.763		438	1957.18	428.966			374	5679.07	602.99		409	557.438	259.354
	423	1967	589.859		350	972.594	2528.49			426	94.9671	1323.11		387	667.062	5722.45			345	1115.94	52.6562		374	66.8913	994.707			417	13578.6	5480.06		439	422.278	17492.2			375	1340.18	406.46		410	2886.59	2164.03
	425	1604.06	1378.11		351	2101.88	42049.1			427	892.276	355.572		388	152.417	1438.54			346	3539.01	-70.37		375	851.461	28.6842			418	1071.68	109.95		440	1695.72	636.667			376	1209.41	1444.58		411	573	175.5
	426	952.393	262.214		352	585.125	4911.25			428	1130	525.542		389	2182.29	16963.4			347	533.354	5.97222		376	-10.4444	742			419	1347.7	91.5764		443	944.046	1746.68			377	2989.38	615.803		412	626.895	1545.47
	427	658.231	368.506		353	1613.85	73497.8			429	920.023	288.318		390	822	500.5			348	1123.18	-4.35294		377	838.949	87.0147			420	1195.45	80.6908		445	4344.65	3593.98			380	674.986	171.278		413	3377.09	2883.03
	428	1657.06	1582.74		354	4260.46	13755.8			430	1890.62	603.171		391	4124.94	4478			349	1973.56	-33.7		378	3160.33	187.917			421	1519.82	65.7059		446	2939.28	405.217			381	6891.38	823.167		414	1680.21	404.079
	429	1072.41	756.719		355	666.062	1990.2			431	1607.79	411.105		392	2065.69	3858.06			350	753.965	-3.625		379	18.25	10069.3			422	1425.8	121.167		447	913.625	154.375			382	1742.69	355.099		416	4305.5	1203
	430	1226.69	-106.548		356	1803.61	6783.12			433	1121.16	200.636		393	926.875	6266.75			351	445.25	-1.63194		380	36.119	2.21429			423	5767.9	306.45		448	343.21	9447.68			383	4980.8	409.344		417	1637.51	526.961
	431	2300.86	5006.72		357	1229.69	9355.7			434	3791.06	501.99		394	671.521	6199.23			352	1127.1	28.2059		381	-3.02404	2350.62			426	1290.86	118.934		449	1685.41	157.489			384	1297.68	26.6908		418	1256.64	668.216
	432	347.667	1608.74		358	4500.13	11097.8			435	133.184	1386.76		395	339.908	181.217			353	0	0		382	-24.4511	3550.74			427	849.493	34.0903		452	1816.67	204.111			385	2612.28	634.097		419	815.289	119.684
	433	1831.13	415.957		359	1219.62	8342.32			436	97.4306	1049.25		396	246.359	203.203			354	615.556	-6.22222		384	-57.8229	2086.95			428	1403.92	50.875		453	13578.1	2252.43			386	685.894	108.894		420	2397.02	1140.47
	434	3643	847		360	475.363	3182.72			437	580.25	49.0789		397	979.846	4160.22			355	45.1739	4.40625		385	591.261	7176.65			429	1169.83	57.3		455	1203.64	356.592			388	1145.41	381.96		423	489.634	26957.5
	435	1780.34	1048.86		361	637.35	37782.2			438	4081.96	829.184		398	504.174	6686.48			356	321.4	-21		386	-15.8015	757.574			430	3500.41	1257.93		458	767.838	144.544			389	1951.07	144.52		424	192.974	364.355
	436	1528.35	561.941		362	870.779	6155.3			439	499.513	178.697		400	947.423	450.071			357	1062.79	-9.85714		387	-34.6118	1193.18			431	1474.13	132		459	1652.14	1403.33			390	5048.68	408.333		425	711.474	7.26316
	437	1544.03	338.409		363	784.287	6778.53			440	731.816	227.066		401	551.473	958.647			358	508.077	32.425		388	-1.41667	1076.65			432	3148.74	151.478		460	1520.91	558.566			391	3893.64	1413.5		426	385.369	253.381
	438	2724.64	18165.8		364	737.826	3405.17			441	605	95.9524		402	990.279	847.192			359	5.94828	2.42614		389	350.737	424.316			433	5336.53	587.179		461	5269.39	857.891			392	594.737	21.58		427	3201.12	3667.92
	439	894.075	367.525		365	2764.27	36029.7			442	1118.1	419.507		403	538.467	5330.04			360	740.265	-30.6176		390	-68.075	2328.25			434	1828.63	131.587		462	3968.48	347.277			393	3289	295.294		429	603.413	566.755
	440	856.493	383.724		366	786.28	4749.85			443	1270.43	3446.1		404	445.197	341.454			361	1361.11	-21.1579		391	912.397	176.676			435	874.757	44.4861		463	1334.41	113.912			394	352.662	2796.76		430	1905.78	456.361
	441	3969.93	5250.52		367	3613.48	6630.05			445	1169.62	3367.75		405	113.158	2116.76			362	2202.89	38.7895		392	-36.7303	1002.02			436	1458.74	95.5		464	1175.54	293.272			395	2560.99	397		431	316.4	2979.12
	442	1989.01	523.663		368	140.667	8785.18			447	1146.75	226.917		407	157.441	1913.73			363	151.45	40.7		393	2493.21	202.369			437	8603.71	673.625		466	2434.94	301.188			396	1304.85	311.799		432	1424.67	32.119
	443	1407.2	348.692		369	619.9	1842.58			448	331.755	1877.15		409	2909.18	30885.9			364	756.25	11.2563		394	908.079	256.197			438	19082.2	1249.41		467	1596.89	149.414			397	1283.71	82.7708		435	528.141	239.531
	445	508.199	23158.3		370	813.067	4915.41			449	1384.91	413.908		410	276.375	2991.88			365	3.6625	-16.3125		395	-123.27	3721.83			440	3567.6	333.803		468	1592.36	773.283			398	1805.37	109.613		436	147.219	3593.86
	446	1256.7	462.974		371	4210.24	85385.2			450	1800.79	1547.88		411	541.505	4783.68			366	873.684	-86.1711		396	500.222	13940.4			441	2589.2	246.461		472	5982.93	1050.98			399	1254.09	-80.2562		437	1604.96	236.299
	447	533.75	23.75		372	1508.85	29550.6			451	910	180.5		412	416.474	491			367	844.625	-17.1875		397	-5.00694	987.25			443	1195.17	51.9583		474	2369.5	300			400	3495.26	221.115		438	107.809	5108.89
	448	1656	680.75		373	630.85	5089.25			453	569.778	463.667		413	488.37	405.717			368	154.5	36.3		398	-27.5789	543.579			444	2819.95	772.526		475	19259.9	2195.25			401	5501.12	194.105		440	759.838	173.25
	449	3243.28	1217.12		374	-368.72	19747.8			454	4064.71	2835.7		414	290.812	1956.38			369	1319.75	59.125		399	-30.875	630.375			445	1361.04	59.2353		476	926.81	4020.98			402	500.697	291.026		441	468.283	221.211
	450	1556.15	823.688		375	141.423	21835.8			456	1437.47	521.842		415	852.289	951.711			370	925.669	43.7063		400	-46.8684	521.474			446	895.969	147.75		477	612.329	39.1513			403	1843.12	83.1333		442	377.5	3918
	452	139.775	316.3		377	1617.56	13216.6			457	425.331	444.265		416	753.962	8089.35			371	89.575	-23.475		401	807	-6			447	916.925	554.519		478	834.984	411.047			404	6468.7	335.697		443	91.9259	10484.6
	453	397.125	85.4205		378	314.188	36109.6			458	716.75	281.455		417	265.812	2885.69			372	953.75	64		402	-30.0909	1424.09			448	1770.79	127.92		479	7215.73	1054.09			405	694.316	39.7632		444	405.25	3961.5
	454	593.812	401.5		379	162.741	23106.5			459	780.531	164.725		419	247.417	1728.42			373	1738.79	23.8889		403	-98.4211	1628.26			449	1436.03	119.975		482	1406.37	715.421			406	3549.58	406.75		445	921.184	679.868
	455	3035.83	395.402		380	1803.9	7083.47			461	2380.95	499.289		420	293.434	2785.1			374	707.653	14.4297		404	-207.116	11712.9			450	1047.7	115.7		483	2322.32	386.132			407	1262.32	74.5		446	4719	2470.47
	456	2938.15	1634.49		381	1874.74	7193.02			462	1326.35	223.332		421	265.431	174.528			375	122.933	-7.35714		405	56.8684	1074.21			451	8828.37	536.234		484	10225.7	2676.87			408	639.375	57.75		447	2100.63	890.684
	458	725.396	1955.02		382	1075.5	9621.22			464	155.022	1850.22		422	420.973	665.457			377	1339.93	57.8062		406	1366.13	38.8261			452	5181.93	426.02		485	751.184	30.1053			409	3856.63	460.421		448	1948.72	1084.62
	460	2108.88	1430.52		383	1854.42	9888.13			465	4360.76	1640.65		423	607.312	5657.41			378	1163.8	-12.0469		407	1159.15	118.362			453	777.5	-8.5		486	595.685	11415.4			410	3277.97	375.931		449	761.426	401.956
	461	3683.55	860.164		384	669.4	17229.8			466	279.901	146.25		425	1749.83	1306.61			379	947.95	-8.7		408	1924.62	267.562			454	683.421	811.737		488	448.185	2300.3			411	2566.3	27.6184		450	724.112	64.325
	462	838.143	91.0122		385	3588.16	51260.8			467	3119.46	719.783		427	413.171	5091.96			380	912.375	50.0417		409	5.32955	948.773			455	1363.63	91.7368		490	1331.12	225.381			412	936.171	145.684		451	722.368	299.25
	463	1287.72	801.969		387	3055.13	14738			468	132.342	1615.63		428	448.809	4859.01			381	132.225	11.3875		410	-34.6061	3012.04			456	10832.8	695.241		491	1138.53	186.421			413	2386.21	251.553		452	8959.35	4307.8
	464	2617.3	20052.4		388	2004.9	14613.5			470	3750.58	1237.82		429	161.816	2244.72			382	1311.22	11.4722		411	864.11	1231.69			457	518.028	99		492	14231.1	1205.15			414	972.403	82.4444		453	2117.58	695.105
	465	1246.74	854.868		389	648.794	2203.12			472	479.903	352.506		431	718.15	5632.75			383	618.158	26.55		412	27.2356	4599.42			458	1531.59	147.529		494	1465.75	192.583			415	6108.28	11766.9		454	553.889	111.306
	466	2218	460.25		390	2573.26	31016.9			473	494.977	643.153		432	481.725	3967.97			384	1664.03	16.9375		413	31.6667	921.667			459	741.875	81.7344		495	900.756	190.113			416	4156.72	11023.9		456	283.53	5539.99
	467	1023.84	1095.1		391	1708.98	8585.16			474	665.224	86.9342		434	115.296	1462.41			385	1287.86	-7.22727		414	-37.2857	1136.29			460	4506	730.395		496	45.524	14384.7			419	3841.25	368.035		458	616.5	212.75
	468	1606.19	1306.36		392	2419.46	18712.6			475	2204.26	721.579		435	335.217	282.87			386	963.829	-32.4342		415	146.338	566.941			461	2194.95	25.5987		497	2064.07	468.676			420	607.526	47.5789		459	607.76	3789.14
	469	4612.79	5438.56		393	223.704	16779.9			476	472.471	332.529		436	170.685	1865.01			387	1217.59	-40.7059		416	365.526	2353.26			462	1752.22	1950.52		498	1216.34	142.537			421	746.454	17.0066		460	582.596	9012.24
	470	1872.38	-20.8671		394	1383.22	7605.17			477	1177.12	417		437	581.461	366.237			388	67.2	-0.482955		417	-82.8289	2470.5			463	1737.39	87.5588		499	1360.67	2155.05			422	3496.61	381.391		461	2574.01	722.337
	471	3173.62	1298.04		395	886.308	3964.69			478	2327.09	3129.49		439	358.552	2528.57			389	776.611	22.4861		418	-7.44565	950.69			464	1318.17	206.857		502	2137.63	344.893			423	1344.25	99.4605		462	2227.51	45460.4
	472	3000.19	2038.17		396	3766.16	22590.9			481	189.667	1763.67		440	704	635.652			390	495.729	-31.1042		420	893.906	70.25			465	2671.62	194.19		503	6628.38	1697.17			424	1250.52	157.993		463	887.283	303.868
	473	671.95	304.863		397	2672.01	13559.7			482	456.322	100.612		441	2223.26	23713.8			391	137.863	28.2		421	482.648	91.9922			466	20519.8	1214.59		504	1390.38	242.194			425	1742.06	63.7647		464	574.618	253.908
	474	2279.3	905.911		398	1048.04	3696.68			484	1317.83	140.579		442	518.312	882.812			392	874.712	20.725		422	20.2105	1677.72			468	1626.92	295.926		507	1442.5	250.5			426	11131.1	854.245		465	1191.77	313.476
	475	930.714	291.381		399	518.135	54019			485	763.978	156.391		443	559.083	522.333			393	1097.48	-12.0547		423	-26.5312	1371.43			469	1947.83	2731.15		508	3696	1688.5			427	609.469	29.8438		468	1787.2	1145.55
	476	2561.68	902.456		400	569.312	2170.33			486	421.868	183.053		444	1363.2	1288.75			394	479.262	30.225		424	-22.9167	928.688			470	2646.75	287.083		510	1350.74	326.211			428	2536.5	296.826		469	927.388	3341.91
	477	3205.47	2554.68		401	870.19	9009.14			488	622.474	276.474		445	729.276	763.375			395	599.25	-39.6458		426	8.78947	2106.84			471	775.581	98.9437		512	5736.61	894.957			429	639.61	47.6471		470	652.578	13474.1
	478	2674.03	756.427		402	1741.17	8255.62			491	2116.01	303.435		446	1063.52	393.891			400	529.734	-39.3516		427	960.396	92.3333			472	5386.29	447.625		513	19319.5	3892.48			430	2011.61	-257.25		471	1744.61	758.783
	479	1759.95	3362.24		403	1171.28	7429.42			492	8423.64	3576.07		447	181.438	1993.42			401	651.746	18.9		428	557.889	151.889			473	858.583	166.25		514	2834.08	483.739			431	68.875	-6.65		472	229.483	9460.65
	480	484.806	188.639		404	382.486	43505.2			494	779.847	393.25		448	241.948	2459.79			402	566.046	-48.9211		429	-55.288	1779.61			475	1860.63	58.8553		515	801.847	202.403			432	12324.4	971.457		475	2935.12	1783.51
	482	245.75	6443.16		405	653.48	4158.92			495	870.217	1302.72		449	694.85	3044.49			403	48.2821	-14.4		430	-220.037	6953.52			476	1274.5	42.375		518	2474.75	560.4			433	9010.61	672.889		476	239.239	6444.58
	483	4611.59	3000.93		406	1419.36	8773.71			496	456.592	1742.79		450	463.761	612.777			404	902.289	2.05263		431	-57.7763	1944.22			477	2350.57	305.08		519	566.389	147.882			434	636.031	319.219		477	4146.05	4563.97
	484	1353.31	1161.69		407	1145.03	5707.2			497	304.143	94.5714		451	275	3245.35			405	383.35	9.525		432	818.625	-3.3125			480	1289.47	195.789		522	1907.93	749.304			435	1263.16	17144.7		478	1953.95	596.053
	485	566.875	1462.54		408	1809.78	7819.06			498	5588.79	1318.88		452	1451.82	16174.2			406	1391.56	-43.4286		433	-57.06	1962.69			481	5838.05	172.526		525	2744.79	521.921			436	2678.31	531.078		479	899.063	4943.8
	486	558.393	26152		409	849.972	4949.09			499	1021.93	96.2895		453	104.164	1241.2			407	1414.06	-40.0125		434	-152	3782			482	1216.92	22.6667		526	1659.65	282.178			437	838.772	39.0294		480	843.208	195.146
	487	293.312	11734.4		410	1556.61	11720.5			500	750.737	150.691		454	953.237	5255.24			408	1492.61	69.25		435	-67.1316	3065.68			484	693.312	53.4653		527	4663.18	621.37			438	2378.86	2.65385		481	662.27	1957.42
	488	3848.18	41514.1		411	481.279	11376.5			501	992.421	668.026		455	475	490.647			409	1321.96	109.5		436	-21.9457	1473.87			485	1578.26	229.368		529	1670.15	399.007			439	2090.68	83.8289		482	297.125	15774.9
	489	1167.81	573.672		412	1218.29	7364			502	1458.56	252.072		456	493.421	4828.68			410	597.728	-24.6471		437	2325.2	393.391			486	1065.52	183.031		531	2027.79	493.917			440	810.118	11.9706		483	548.574	277.235
	490	549.375	553.506		413	2772.1	32518.1			503	707.013	434.184		457	373.108	322.642			411	433.3	-1.8		438	-182.375	3148.12			487	51.6875	-4.09375		532	486.846	16987.8			441	2075.43	110.395		484	4234.94	1215.62
	491	1136.52	197.022		414	1317.42	11419.6			504	202.25	930.467		458	78.6711	995.092			412	8.53521	0.861111		440	-311.069	11591.8			488	659.25	61.4375		533	104.323	45082.3			443	10182.1	881.572		485	455.474	293.421
	492	1247.94	321		415	3244.01	11847.8			505	228.048	137.006		459	1153.98	1787.16			413	1056.92	44.0526		441	40.6429	2.39286			489	1773.5	108.25		536	1371.63	83.6667			444	927.875	8.875		486	1081.08	112.276
	494	123.995	5230.2		416	1143.2	39619.4			506	3160.26	1793.43		461	321.5	312.789			414	575.8	-5		442	-30.1765	824.529			490	809.816	1.61842		538	1765.68	-62.5526			446	1364.34	276.239		487	1326.26	145.474
	495	2842.98	4776.5		417	1857.47	10926.5			507	474.138	433.336		462	220.763	214.678			415	848.857	49.9464		443	-99.8125	2994.88			491	1559.8	116.349		540	1140.5	125			447	554.779	59.2836		488	2165.44	518.916
	496	1682.48	190.581		418	10.8333	21535.2			508	1302.39	179.007		463	512.667	184.896			416	26.9375	8.5		444	-105.53	2782.59			492	4703.97	276.553		541	2144.4	2029.4			448	999.75	61.4375		489	804.553	856.421
	497	542.25	375.125		419	610	2069.94			509	3172.67	1117.83		464	423.447	232.421			417	49.75	-4.9375		445	-131.132	3968.94			494	665.203	87.7344		542	940.625	115.125			449	1375.62	3172.17		490	1074.39	866.522
	500	866.44	3250.34		420	646.882	32291.7			510	5839.97	1984.99		465	1228.47	6733.54			418	60.5227	3.78261		446	-85.9375	2936.23			495	632.538	76.6438		543	569.37	5796.37			450	1887.53	198.886		491	800.739	721.174
	501	1055.25	33.625		421	789.32	2859.73			513	1957.32	1351.44		466	443.375	539.449			419	512.312	-0.1125		447	-57.3333	2171.33			496	1764.25	20.9167		544	1445.05	190.379			451	1634.77	1478.46		492	1984.52	2018.99
	502	2372.75	2024.97		422	4830.42	19005.1			514	518.306	404.194		467	985.698	7782.19			420	1031.03	29.3618		448	676.5	1041.83			497	928.842	204.75		545	2211.89	300.132			452	546.816	1996.28		493	1017.41	201.276
	503	733.766	355.125		423	4729.24	20435.3			515	441.026	335.809		468	438.705	239.261			421	7.3125	-2.875		449	-106.842	3155.5			498	2235.76	-514.554		547	2806.69	493.528			453	930	272.237		494	683.039	133.727
	504	761.647	427.412		424	3230.29	20212.6			516	732.647	292.412		469	808.842	1333.68			422	811.706	61.1912		450	48.5288	12912.8			499	-6.375	-6.625		548	726.633	283.055			454	407.89	-6.39583		495	1091.93	3103.48
	505	894.906	381.656		425	2556.66	39717.7			517	780.171	218.737		470	258.308	2283.65			423	1152.01	11.3603		451	651.974	3.28947			500	1396.43	58.1429		550	966.526	155.474			457	2545.09	270		496	2827.46	11703.4
	506	950.474	299.263		426	1915.19	9445.65			519	1129.44	305.194		471	808.38	6791.52			424	755.941	-13.5294		452	-41.93	1695.91			502	694.684	169.211		551	11376.5	105.868			458	6793.92	435.575		497	896.667	192.292
	508	1640.93	679.5		427	1593.96	11353.5			520	1089.25	645.273		474	638.885	4522.01			425	1359.58	45.4737		453	10095.8	393.522			503	1374.95	50.7368		552	5005.88	1682.75			459	9255.9	1355.25		498	926.069	563.153
	509	1162.32	606.989		428	731.145	32974.6			522	1163.76	1310.57		475	571.693	742.636			426	1381.26	-91.0526		454	-46.2632	1032.86			504	744.211	5.36842		554	10133	1506.43			460	3072.85	1493.88		499	321.16	4820.8
	511	1446.32	1241.58		430	565.875	1976.99			523	2194.73	834.618		477	597.62	496.326			427	509.713	5.625		455	-60.7895	1077.63			505	1680.12	192.276		555	2906.86	369.511			461	2088.78	950.652		500	714.701	400
	512	4386.8	1587.65		431	1158.59	6930.46			524	864.566	78.4485		479	141.177	1738.05			428	991.75	-9.95833		456	49.9236	1127.99			506	2113.3	173.696		556	838.529	70.7059			462	900.474	133.789		501	784.783	47.0855
	513	3430.56	1583.92		432	1480.78	5585.33			525	1201.22	258.478		480	470.75	243			429	617.928	17.5		457	-429	17532			507	812.088	70.2353		557	2727.82	1676.13			463	597.632	22578.1		502	5602.32	1779.76
	514	1308.38	914.231		433	425.538	7678.63			526	994.665	142.67		481	271.013	225.5			430	459.794	-16.8603		458	2018.38	53.9211			510	832.833	90.7746		558	2580.61	362.803			464	2766.32	537.88		503	1481.47	230.807
	515	4269.82	8901.95		434	2242.78	11482.1			527	2164.25	536.104		482	188.5	47.5			431	518.789	16.125		459	1025.4	139.053			511	13337.7	874.581		559	2800.48	618.348			465	2414.08	3925.22		504	1488.26	258.228
	516	389.875	187.719		435	114.611	11542.9			528	3498.67	1216.67		483	169.487	1762.29			432	1326.56	-21.2875		460	-38.75	2062.13			512	1362.91	75.6118		561	838.079	212.645			466	2970.48	448.068		506	6228.94	1539.62
	517	463.546	706.632		436	1029.21	4970.67			529	1123.87	198.087		484	191.261	1634.83			433	1463.5	55.375		461	114.2	7.75			513	1967.35	135.861		563	4071.52	745.985			467	1909.39	156.845		507	5142.62	5004.62
	519	3420.85	1032.61		437	3109.38	35945.1			530	1598.45	303.507		485	227	2472.53			434	963.4	1.4		462	-18	800.526			514	3973.19	588.55		564	658.086	578.395			468	500.4	48.2625		508	1195.75	488.5
	520	2937.32	758.921		439	1165.61	4526.7			531	699.941	181.529		487	876.237	866.408			435	483.179	-28.5625		463	-25.6316	1257.47			515	902.889	97.3611		565	3020.71	527.308			469	1208.64	26676.8		509	404.513	95.0855
	521	3589.78	681.859		440	323.269	17785.7			532	954.5	404		489	1014.7	8774.5			436	1655	38.3158		464	1798.26	35.2083			517	1301.75	11.5		566	2793.45	519.395			470	26.5	18717.5		511	1186	734.803
	522	752.8	305.6		441	3340.68	3228.7			533	2774.37	1061.53		490	540.776	1791.42			437	1630.8	62.7105		465	-382.991	20358.4			518	1136.17	59.1406		567	610.25	1980.62			471	514.094	3531.47		515	1113	7686.05
	523	1613.16	724.568		442	1020.5	50707.1			534	1102.14	448.994		491	1481.52	1100.83			438	74.9274	4.5625		466	-194.594	3829.19			519	4990.05	487.854		568	622.688	85.0859			472	8835.12	522.705		516	1734.42	1070.24
	524	2777.2	1087.87		443	630.125	11925.8			535	1077.54	744.29		492	2017.41	2959.7			439	794.469	37.9375		467	2204.76	209.6			521	4769.21	849.638		569	8586.67	1984.69			473	2906.91	106		517	1664.86	881.388
	525	1190.21	176.289		444	1418.67	5414.83			536	528.45	1286.45		493	695.486	234.465			440	1733.24	75.4022		468	222.2	77.45			523	819.978	91.0588		570	690	147			474	4097.44	121.57		518	801.768	12871.8
	526	1103.6	843.6		445	1044.34	2984.8			538	6033.02	3638.7		495	733.028	1107.21			441	963.929	-59.0714		469	-47.3472	1464.47			524	769.522	-66.0882		572	4325.5	1031.73			475	809.836	97.0938		519	10077.1	4287.25
	527	4103.97	1459.34		446	1889.58	6868.5			539	185.855	1779.92		496	1245.47	1477.06			442	1172.29	-22.6471		471	813.469	127.375			525	1227.06	106.531		573	188.63	20422.9			476	692.515	7.19118		521	682.571	184.667
	528	821.794	228.2		447	1947.8	10344.2			540	84.1458	1299.77		497	1273.7	680.32			443	50.093	11.4091		472	-59.3421	1690.8			526	2874.17	204.542		574	351.981	14932.2			478	1789.51	21.2308		522	1500.11	3848.05
	530	1278.35	54.2353		448	747.2	2740.38			541	1898.54	341.921		498	496.75	736.645			444	1357.62	-1.38068		473	-179.579	5660.84			527	1736.13	146.69		577	560.116	31430.4			479	2669.2	40.2159		523	911.036	264.857
	531	1249.78	19747.8		449	2856.55	21759.9			543	887.261	490.364		499	357.572	379.171			445	753.533	-20.75		474	2726.05	81.2105			530	872.875	31.875		579	11137.1	1998.64			480	169.35	-101.25		524	494.684	191.474
	532	1865.57	252.761		450	384.7	6039.78			546	378.776	103.474		500	851.197	594.283			446	1271.38	47.6176		475	-100.354	3213.71			531	11195	1007.94		581	7067.16	2120.71			481	1719.51	158.961		525	973.147	790.766
	533	3163.44	751.926		451	1057.3	5473.93			547	3248.61	404.487		501	379.897	199.441			447	1152.62	5.75735		476	557.556	17.6667			532	1150.12	3.125		582	3961.37	438.394			483	2459.66	-32.7895		526	236.684	170.184
	534	2829.11	915.01		452	2292.26	19391.7			548	1345.4	460.682		502	1518.58	972.845			448	1749.47	-9.56944		477	-42.2717	1642.04			533	2338.61	269.355		583	2508.51	676.707			484	550.112	144.25		528	1819.8	481.954
	535	699.323	779.25		453	1569.79	3613			549	1124.12	83.7647		503	1072.84	11408.5			449	977.5	20.1016		478	-114	1606.25			534	6612.81	5721.07		585	1357.43	204.422			485	11493.4	824.73		529	637.099	490.836
	536	2018.5	1036.51		455	411.402	15607.2			550	435.211	274.118		504	574.224	470.954			450	546.778	74.6944		479	-27.7237	774.461			535	12439.5	1290.44		586	451.742	16560.5			486	2448.32	751.763		530	510.974	1910.86
	537	1819	1417.03		456	556	1474.88			551	971.111	231.25		505	267.958	92.4583			451	1450.78	-4.45588		480	922.434	142.954			536	1603.25	145.026		587	1816.24	238.572			487	1684.36	120.52		531	1031.54	651.565
	538	990.095	96.381		458	547.085	11784.8			552	120.739	993.565		506	259.352	522.227			454	2061.27	-54.75		481	-102.333	4197.6			537	993.188	8.65625		589	3490.35	760.652			489	436.014	381.757		532	3462.61	965.891
	539	1167.75	83.25		459	1059.03	7699.61			554	1332.09	467.913		507	524.062	3707.04			455	709.882	-2.30882		482	3964.95	46.7368			538	4729.15	391.126		590	1373.5	709			490	13105	1155.47		533	721.105	266.421
	540	2258.4	696.8		460	3374.75	13152.4			555	873.895	194.151		508	2090.87	1316.16			456	768.188	-35.125		483	504.875	71.6597			540	1792.5	1.75		591	5087.74	5908.93			491	2640.16	199.724		534	744.294	278.449
	541	1861.84	1442.67		461	729.2	3913.55			556	6532.57	1409.19		509	450.125	4818.81			457	895.405	-5.7		484	632.196	50.6548			541	1009.66	40.5933		593	850.545	286.636			492	4816.24	200.99		535	359.658	587.079
	542	-2.93182	1372.65		462	2423.24	12364.8			557	265.562	129.188		510	877.88	7054.96			458	738.281	19.0156		485	-34.5526	1434.24			542	903.083	67.5833		594	6419.29	1806.47			493	3383.74	1172.22		536	1039.7	244.928
	544	2470.17	794.386		463	573.797	25888.5			558	541.611	72.8056		511	464.109	1437.81			459	873.289	72.7105		486	-151.84	5844.04			543	1255.36	94.5956		595	863.664	152.046			494	876.5	65.88		538	911.408	219.421
	547	1052.86	349.075		464	1681	3012.98			559	1612.53	509.275		512	187.224	1939.13			460	329.135	15.6538		487	-71.1974	2225.58			544	439.222	103.611		596	1224.58	-29.4868			495	531.644	125.931		540	6475.64	5032.34
	549	1490.1	206		465	3774.26	7416.19			560	379.663	172.263		513	1116.74	13868.2			461	865.447	-11.4408		488	201.421	320.75			545	1150.11	26.75		599	10650.2	1433.12			496	1870.98	48.3696		541	2089.07	1257.41
	550	725.2	337.2		466	1136.8	5992.6			561	3596.74	1496.04		514	473.865	572.021			462	1343.68	-7.03289		489	895.265	42.1397			546	2091.42	250.211		601	1668.66	417.013			497	2189.94	612.812		542	1442.11	363.368
	551	727.425	520.975		468	2264.54	69444.7			562	338.82	150.328		515	114.125	1260.12			463	622.974	5.92105		490	36.1875	2232.58			547	860.292	44.375		602	9667.52	1414.62			498	4517.36	476.211		543	693.208	331.194
	552	789.152	4600.46		469	833.74	5165.57			563	2154.62	1284.88		516	1074.03	938.553			464	979.602	-1.28906		491	67.6157	9054.98			548	2992.08	419.816		604	1740.88	243.669			499	958.963	39.8162		544	15749.5	6846.07
	553	256.861	16925.9		471	379.043	14591.3			564	493.972	55.0208		517	1085.4	810.25			465	476.7	-4.6		492	124.312	15070.7			549	5220.17	518.987		605	4129.12	587.321			500	237.875	14786.8		545	924.132	380.5
	554	797.812	17024		472	1824.57	4655.89			565	1618.49	368.13		519	291.289	1815.95			466	658.362	17.4013		493	26.7237	2093.38			551	975.603	41.4265		606	825.336	631.52			501	5929.25	2523.62		547	8109.62	2381.06
	555	694.542	155.049		473	1023.25	4099.13			567	887.043	890.739		520	335.269	6014.4			467	58.7581	-5.52344		494	-44.7368	2193.79			552	1741.78	90.8889		607	989.871	41366.1			502	1818.98	86.5		548	1297.41	257.731
	556	2313.08	1909.66		474	821.574	4944.55			568	1596.14	327.868		521	1835.73	20062.8			468	942.909	15.6471		495	-259.7	8915.82			553	1410.12	10.2734		609	3923.11	482.56			503	1604.14	288.237		549	1204.42	887.761
	557	2830.34	362.338		476	1035.68	6472.46			570	459	53.375		522	115	1283.08			469	1276.37	97.0809		496	1306.82	104.682			554	1043.47	71.1375		610	690	202.529			504	660	261.882		550	1888.52	750.38
	558	217.779	14357.3		477	1385.75	10566.9			571	313.688	162.812		523	1154.61	1363.79			470	1224.06	-35.6761		497	-43.8182	1146.16			555	561.219	66.375		612	2926	8301			505	43.4167	3.25		551	1434.38	749.896
	559	4286.57	2369.22		478	2466.64	8879.48			572	1317	254.5		524	1161.56	1015.32			471	925.508	-34.1176		498	-322.085	11021.1			556	853.919	29.4118		613	782.612	205.882			506	1088.38	97.44		555	6499.88	3187.9
	560	2456.62	1599.97		479	691.67	11805.5			573	2187	808.049		525	777.563	1327.56			472	958.803	0.388158		499	520.235	-9.91912			557	465.092	111.908		614	1028.7	553.441			507	1020.08	222.667		557	597.434	269.007
	561	3871.19	825.292		480	451.19	13474.6			574	1029.07	69.2857		526	707.895	534.368			473	764.664	22.0461		500	3.45833	818.75			558	1559.56	138.556		616	1355.2	2627.68			508	3203.32	2344.08		558	760.357	304
	562	3746.06	1462.5		481	72.9677	11347			576	2117.96	1186.68		527	951.902	547.587			474	1181.81	57.1875		501	16.3438	1119.28			559	15023.3	1158.58		617	4287.31	809.619			509	1076.78	814.801		559	420.237	248.553
	563	1011.66	1294.22		482	297.491	16121.2			578	63.3068	785.011		528	898.181	7991.46			475	1031.89	-24.6607		503	2382.62	185.27			560	5276.65	100.815		619	915.992	132.023			510	1018.64	173.234		560	3839.47	759.192
	564	359.898	344.886		483	1444.79	5397.21			579	2607.19	2916.85		529	285.167	322.25			476	10.0625	-31.9		504	-69.75	1799			561	1117.1	98.25		620	3581.29	521.368			511	757.178	1104.69		562	373.148	25367.3
	565	408.288	5016.49		484	1316.43	26057.6			581	3585.22	741.455		530	346.684	3835.37			477	106.425	-28.3375		505	53.5365	2244.39			563	40390.6	3158.83		622	2376.54	107.083			512	1890.05	311		563	17.875	7583.62
	566	88.8393	1256.86		485	3841.96	30706.1			582	319.263	77.8421		531	399.526	3214.74			479	611.125	39.25		506	-26.0163	1137.06			564	1624.29	23.8235		623	702.375	178.25			513	1212.54	78.7836		564	2312.44	1451.6
	567	2295.63	504		486	3027.91	7181.07			583	8665.8	2985.06		532	205.816	2229.47			481	1127.24	33.1484		507	677.25	25.8824			566	5440.55	545.079		625	1469.82	337.494			514	918.882	44.3529		565	819	485.243
	568	1827.52	51753.5		487	2295.83	36958			584	2360.27	667.987		533	378.5	316.5			482	1573.67	-83.962		508	218.208	350.84			568	1073.42	94.6842		626	8553.71	1317.82			515	2119.5	97.7426		566	323.47	16252.8
	569	2589.21	712.073		488	262.786	32289.7			585	1905.63	630.684		534	813.331	516.404			483	1079.29	32.8235		510	1352.5	-7.125			569	1240.28	84.5312		627	2919.96	504.434			516	1539.66	130.5		568	5030.73	2761.46
	570	498.456	359.787		489	1308.75	4950.18			586	1756.26	395.429		535	1212.42	9671.59			484	698.308	-31.25		511	-64.1196	1733.14			570	572.066	121.76		628	866.355	198.743			517	581.43	-19.7188		569	943.943	1874.56
	571	554.716	-76.8409		490	2278.71	28535.8			590	437.208	122.604		536	1869.83	3467.84			485	1083.52	-7.91667		512	-70.5329	2347.78			571	3344.01	498.25		629	995.111	228.056			518	1518.25	120.84		571	906	371.787
	572	4441.41	1706.06		491	657.115	2795.83			591	482.368	156.737		537	488.875	653.375			486	177.137	-58.475		513	-143.854	3822.43			572	2316.53	17.8289		630	2079.76	727.602			519	4251.23	534.735		572	867.941	118.691
	573	1242.97	762.76		493	1095.78	11764.4			592	387.263	733.776		538	315.592	546.046			487	591.938	40.9625		514	-35.2961	1025.88			573	784.684	99.8684		631	986.869	22.7875			520	1543.83	245.796		573	3046.57	1822.14
	574	2019.94	4134.66		494	838.04	6750.73			594	938.75	257.25		539	1602.7	690.02			488	39.35	-1.15		515	-60.5903	1468.37			574	6153.67	767.023		633	1090.92	41.2778			521	1252.82	200.393		574	8944.57	3487.73
	575	1753.93	2149.95		495	1751.83	9604.33			595	741.197	163.101		540	716.395	522.842			489	323.861	212.361		516	5.13158	1058.91			575	1032.33	-4.375		636	1417.34	135.779			522	5583.67	242.013		575	437.638	3470.81
	576	1666	1152.4		496	34.3846	8101.93			596	1440.07	550.181		541	888.977	452.091			490	728.181	-50.525		517	1350.58	95.3977			576	2909.26	264.236		637	4554.38	743.109			523	15366.4	1491.05		576	3767.43	2541.68
	577	1057.13	305.855		497	423.736	1106.91			597	892.75	80.25		542	2638.92	1966.46			491	603.5	-16.6667		519	-19.0789	1478.23			577	1484.18	256.821		638	1395.34	10119.1			524	2389.47	225.818		577	3723.89	1155.97
	578	157.583	7727		499	1625.11	62691.3			598	1933.21	1004.11		544	705.241	7216.37			492	1632.16	-3.5		520	531.066	55.3421			578	1602.44	32.0833		639	807.474	395.632			525	4165.75	684		578	1314.16	10715.8
	579	695	537.458		500	1150.69	3693.08			599	858.375	184.744		545	287.414	2556.04			493	2295.84	21.75		522	-47.7895	2188.84			579	1503.96	3.80469		640	9900.99	-5.22115			526	979.331	98.4254		579	824.646	176.597
	580	609.725	127.125		501	1011.25	2567.37			601	1265.84	1098.8		546	583.54	5968.26			494	820.941	54.3224		523	-44.0625	462.813			580	1196.69	219.556		641	691.072	306.868			527	1890.43	265.026		580	339.737	585.579
	581	1124.29	580.786		502	509.638	3212.12			602	1159.25	230.908		547	273.053	1825.42			495	624.987	30.3026		524	-40.605	2171.92			583	1192.77	25		643	3834.09	633.201			528	3368.53	187.864		582	370.25	3251.24
	582	68.3482	12712.6		503	1697.85	352.622			603	2109.33	1145		548	305.743	389.632			496	1196.94	77.1562		525	79.7557	852.818			584	7058.61	534.435		644	8207.63	1173.17			529	1546.63	64.52		583	2882.99	11167.7
	583	1389.85	423.267		504	556.81	8966.73			604	1255	342.25		549	408.829	548.559			497	805.706	25.9028		526	656.735	-19.3824			585	1619.07	460.989		645	1417.25	229.5			530	1036.93	42.3421		585	874.2	34322.4
	584	2423.56	625.746		505	969.281	5972.53			606	1681.44	155.845		550	301.207	3130.18			498	1097.01	6.25		527	-56.2697	1038.24			586	6047.95	298.015		646	1566.5	271.921			531	811.52	506.211		586	1492.98	1129.8
	585	1865.69	388.108		506	1046.45	5703.81			608	2863.77	982.265		551	481.083	521.292			499	899.1	-9.9		528	2867.05	153.2			587	97.8442	-2.59375		647	445.602	21353.9			532	977.592	257.105		587	7857.81	1887.5
	586	712.861	275.625		507	1163.62	40354.9			609	562.25	470.875		552	513.431	21.8542			500	785.594	34		529	14.9457	1098.38			588	1034.26	42.8529		649	517.32	11018.8			533	1070.85	233.953		588	1127.63	275.921
	587	511.8	147.706		508	719.594	1821.87			610	2006.26	743.699		553	452.524	581.143			501	801.151	40.7237		530	2151.84	549.552			589	1962.57	241.546		650	1101.13	630.114			534	894.184	355.789		589	571.125	218.479
	588	540.684	546.053		509	1772.12	20730.8			612	91	1489.38		554	311.97	2964.95			502	1030.74	12.5		532	88.5	4568.43			591	1392.56	212.555		651	3001.61	544.388			535	8313.16	495.488		590	2761	1327.5
	589	1478.68	231.56		510	-37.9655	17618.3			614	2162.71	320.217		555	934.775	1461.9			503	870.369	35.6125		533	-164.888	5549.36			592	7166.67	609.54		652	9456.7	1166.46			536	1947.96	117.285		591	2865.95	5412.24
	590	634.824	162.882		511	948.3	7202.39			615	81.625	1153.74		557	254.771	3243.49			504	730.026	28.625		534	-28.75	981.875			593	559.625	127.469		653	2110.57	726.5			537	6747.84	813.06		592	1670.22	1002.38
	591	814.559	97.5441		512	2788.42	7097.87			616	2170.1	4615.66		559	210.875	2300.56			505	128.727	5.22059		535	-34.25	2332.5			594	1926.25	120.965		654	1228.24	146.105			539	8118.63	532.55		593	2264.8	4822.63
	592	328.7	7998.72		513	1202.51	6779.47			617	154.579	1692.61		560	349.583	2947.62			506	971.605	29.3182		536	904	-33			596	685.691	15.3553		655	11546.6	2114.63			541	5615.9	665.809		594	8714.5	4088
	593	1951.5	561.99		514	1431.91	5324.44			618	285.875	50.2222		561	346.211	131			507	553.25	39.1042		537	1284.59	44.7303			597	876.294	72.3333		657	658.792	8860.04			542	1459.39	221.014		595	4656.16	4953.58
	594	4511.49	1238.49		516	2944.58	65362.2			619	744.631	290.534		562	373.83	757.551			508	108.5	4.25		539	-51.1053	1376.79			598	697.453	120.875		658	1315.42	41181.4			543	1003.11	224.214		596	318.75	14624.5
	595	4151.06	2598.03		517	1046.62	6555.68			620	1636.02	484.27		563	458.545	306.091			509	1014.6	20.5		540	-19.6053	1287.81			599	3171.94	1015.38		659	1674.16	9.61333			544	4394.94	138.667		597	10123.8	2712.79
	596	1147.57	290.326		518	1215.33	2956.26			625	837.553	129.592		564	154.197	1767.89			510	735.64	25.0368		541	1109.41	115.594			600	2264.1	77.2841		661	797.644	35726.3			546	4413.28	779.565		598	2136.99	2156.42
	597	1539.58	28707.2		519	989.9	3944.76			626	1489.75	391.739		565	153.465	2133.22			511	735.992	12.3047		542	658.941	145.118			601	1658.27	603.273		662	345.14	10095.6			547	894.461	36.0156		599	469.797	137.875
	598	685.583	539.75		520	615.25	1422.31			627	5551.89	1918.56		566	2086.38	5033.86			513	158.7	-45.8		543	653.824	110.809			602	922.797	5.94531		663	4318.84	1026.16			548	1058.1	-10.5694		601	273.403	7748.01
	599	3982.14	1687.78		521	1115.12	4232.36			629	2066.46	560.02		567	615.401	7616.77			514	1401.93	24.4226		544	-195.708	8116.76			603	1518.66	210		665	774.882	249.895			549	4142.01	229.072		602	419.404	7501.63
	600	414.569	166.263		522	1167.17	4951.88			630	484.812	93.4688		568	165.191	1520.47			515	842.431	2.725		546	-76.4737	2057.03			604	1072.61	86.1912		666	7964.34	1534.51			550	2333.38	155.171		603	653.034	9425.46
	601	4654.41	1888.04		523	295.158	6138.74			632	580.471	340.471		569	426	4431.4			516	3134.65	160.217		547	-4.34028	766.132			605	1168.12	-13.7639		667	2651.32	377.05			551	1854.19	358.278		605	587	446.529
	602	989.25	297.25		524	724.082	9944.97			633	3369.32	718.833		570	530.904	5623.4			517	894.42	-30.483		549	-44.5789	1500.02			607	1139.05	102.368		668	821.75	39587			552	989.178	216.5		606	490.069	874.507
	603	494.193	243.58		525	1674.26	19922.5			635	314.861	359.542		571	394.531	313.625			518	550.924	30.625		550	-59.75	726			608	2347.83	238.417		669	779.8	229.1			553	3052.75	139.417		607	2731.68	3568.34
	604	1075.04	624.201		526	843.68	3032.86			636	1326.67	171.647		572	654.447	487.974			519	-18.9872	-27.275		551	-1.84211	1133.47			609	6046.38	572.958		670	1942.58	349.167			554	21084	2286.57		608	515.449	579.912
	605	495.387	194.232		528	1473.14	22967			637	1265.28	193.403		573	294.651	286.099			520	983.188	-1.5625		552	2218.5	26.5			610	562.162	127.691		672	1093.29	1068.83			556	832.401	2984.39		609	2039.17	1981.75
	606	770.25	-77.875		529	1941.76	7220.75			638	227.579	1897.87		574	2244.66	1729.38			521	847.333	29.7222		553	40.0882	5.26471			611	2212.88	-5.91667		676	1329.92	48609.1			557	221.966	674.057		610	223.685	19371.2
	607	749.687	515.125		531	1035.25	6001.03			639	793.315	2296.27		575	340.205	3198.68			522	896.3	-31.9		554	931.25	69.375			612	885.289	10.2303		680	907	78.7778			558	4850.44	592.683		611	1144.72	823.829
	608	771.875	134.675		532	1081.07	14912.1			640	5549.18	4219.27		576	243.566	2658.39			523	1064.92	-38.5278		556	-79.0395	1911.78			613	1352.12	107.153		681	953	191.5			559	2929.2	232.092		612	2601.1	3076.54
	609	2442.44	641.688		533	955.9	3824.63			642	2983.26	2780		578	336.676	187.294			524	-31.9625	-20.8375		557	-25.7727	906.108			614	1069.53	-53.2941		684	745.25	65.75			560	643.122	505.572		614	973.913	2865.69
	610	75.1417	191.908		534	589.4	3475.6			644	992.333	204.292		579	849.792	659.229			525	1355.61	-58.7303		558	-72.3684	904.526			615	2437.12	176.25		685	479.294	120.853			561	794.188	152.672		615	1638.61	576.903
	611	1715.62	1200.52		535	1798.88	6845.79			645	1088.57	320.763		580	2422.5	5412.92			526	77.7045	0.801471		560	-99.1645	2707.47			616	1127.48	117.537		686	511.333	23776.7			562	2988.38	313.467		616	1805.64	420.75
	612	1156.37	368.989		536	280.938	7596.98			647	4348.68	2178.82		581	974	1381.16			527	15.6329	-7.61875		561	1174.87	72.9297			618	1384.65	55.0467		688	1280.91	420.27			563	5569.1	483.72		617	1633.71	652.118
	613	3205.61	969.944		537	3109.21	37760.7			648	1206.01	459.602		582	451.729	317.049			528	462.403	-13.9118		562	1341.61	71.75			619	1017.89	195.408		689	463.066	75.9779			564	710.25	114.438		618	1927.59	957.659
	615	52.625	5628.91		538	135.4	7646.4			649	1639.27	460.347		583	3047.28	5768.38			529	678.421	1.28947		563	-24.6447	632.632			620	894.667	145.333		691	2881.46	533.054			565	1294.35	335.04		619	380.353	424.074
	616	663.625	461.125		539	1675.51	4978.44			650	2249.31	443.615		584	426.222	339.785			530	624.338	18.2222		564	413.908	475.136			621	1575.74	302.756		693	1203.96	34.1791			566	547.104	62.8542		620	3476.3	818.043
	617	870.475	611.481		540	538	8309.99			651	1796.38	557.125		585	1054.71	879.079			531	1025.5	25.2578		565	2393.86	89.8869			622	4401.84	376.691		694	2304.74	425.33			567	1311.73	-10.4524		621	574.289	111.013
	618	839.034	177.966		541	4427.55	31500.2			652	898.858	16.5966		586	535.978	5163.39			532	95.325	-13.8125		566	-36.2557	1712.84			625	1319.63	227.429		695	3086.17	513.026			568	1524.16	3291.26		622	3865.72	1309.57
	619	1328.68	241.099		542	232.219	8298.03			653	1161.57	60.2857		587	754.965	1882.63			533	38.9565	-0.804348		568	-98.68	3887.2			626	978.757	139.276		696	847.891	961.196			569	1459.35	113.018		624	1217.57	320.265
	620	721.2	261.75		543	2298.75	70882.1			654	2536.9	1059.05		588	767.75	6001.25			534	525.227	28.3947		569	505.049	521.098			627	1202.25	-53.75		697	614.956	337.441			570	397.5	87.3438		625	2461.92	580.292
	621	1628.99	256.361		544	635.646	3190.99			655	591.194	177.194		589	559.763	1021.63			535	454.076	-2.35		570	-21.6842	751.789			628	960.537	84.5662		699	1180.25	333.604			571	3358.57	147.316		626	423.176	351.471
	624	1330	397.034		545	668.75	2257			656	1881.84	378.457		590	274.571	2898.57			536	1086	2.45833		572	-4.34211	1052.99			629	1191.11	13.1667		700	2121.32	326.737			572	3106.33	300		627	797.562	106.375
	625	1609.97	696.132		546	741.444	16613.9			657	906.118	115.838		591	745.63	903.087			537	575.75	25		573	1187.02	316.513			630	814.287	22.275		701	1007.37	152.667			573	1477.83	56.4044		628	1582.52	1167.09
	626	1055.56	570.881		547	1058.12	32622.5			658	3163.15	393.771		594	383.685	962.13			538	1062.52	53.4286		574	-49	1423.13			631	404.094	9320.59		702	4079.5	7828.1			574	958.184	139.941		629	326.664	24070.4
	627	1556.24	761.239		548	3313.08	12584.4			660	385.812	270.219		595	1398.62	1378.4			539	8.35	10.55		575	4.82895	588.158			632	680.575	108.15		703	922.506	164.606			575	696.625	387.072		630	410.646	5030.72
	628	2316.78	584.225		549	2319.46	11348.7			661	3739.67	1267		596	579.632	440.581			540	801.45	80.4375		576	852.691	90.4539			633	1158.31	60.65		704	699.955	374.386			576	18794.7	964.792		632	896.118	64.1579
	629	636.5	6925.93		550	96.1	6852.11			662	533.303	147.757		597	231.521	264			541	1534	-29.4318		577	1149.39	82.5789			635	2448.89	163.109		705	1878.33	103.895			578	1793.1	37.3125		633	131.542	3800.71
	630	613	636.043		551	1050.84	388.563			663	158.105	1218.42		598	442.25	390.613			542	970.426	18.2059		578	-26.7763	1017.01			636	1188.47	134.412		706	1250.62	565.625			580	558.185	118.708		634	510.097	450.514
	631	718.737	938.197		552	767.85	9992.92			664	645.294	157.794		600	1099.87	642.829			543	919.025	81.9062		579	0.555556	727.222			637	1038.68	478.237		707	881.309	205.265			581	1021.47	93.9375		636	2118.09	856.674
	632	735.063	204.219		553	918.694	4356.64			665	1192	581		601	355.779	358.779			546	82.6875	-2.55795e-13		580	-21.08	2217.36			638	1234.47	52.7431		709	4053.2	638.711			582	4814.37	413.803		638	563.415	12356.5
	633	857.325	309.481		554	1396.45	5567.92			666	3695.11	648.211		603	812.132	578.711			547	884.934	63.3162		581	1007.21	63.1328			639	1323.91	184.577		711	938.816	196.855			583	2077.7	129.95		640	393.74	6639.17
	634	3640.98	1270.8		555	2035.71	7755.06			667	750.393	164.429		604	1799.37	1326.63			548	68.3125	29		582	-3.67105	1485.74			640	1133.79	101.421		712	427.889	16655.4			584	3988.3	409.472		641	5066.6	2328.11
	635	638.091	177.605		556	4096.43	10238.4			668	2407.81	1066.31		605	232.75	2470.75			549	444.715	-9.98026		583	-41.8553	858.237			641	3086.05	322.125		713	2176.16	11.2632			585	11819.6	1038.65		642	427.042	20029.7
	636	1973.31	1241.77		557	981.527	3017.88			669	1076.08	381.763		606	3279.66	3105.62			550	4230	58.7273		584	1386.66	-46.9145			642	1057.66	77.4079		714	2742.24	1786.85			586	775.389	22243		643	1035.12	264.5
	638	625.381	226.357		558	1143.44	3618.18			671	1994.14	566.431		607	1830	13515.6			551	2658.67	-1.70833		585	-6.98864	696.722			643	3419.25	147.522		715	823.888	114.237			587	800.7	89.8		644	474.82	26765.4
	639	4171.38	1654.48		560	336.487	6717.2			673	1252.83	263.303		608	1974.9	1433.55			553	688.75	-40		586	-62.3224	3068.69			644	3363.66	875.816		717	908.49	9040.85			588	1994.68	247.142		645	286.308	13186.7
	641	983.69	241.313		561	810.804	14633			674	1711.88	834.837		609	443.803	574.355			554	494.1	33.05		587	685.719	12.625			646	2761.98	306.63		718	878.102	149.133			589	5068.12	502.092		646	440.44	6753.54
	642	3362.79	1243.9		562	2332.32	11421.8			675	1437.14	1194.2		610	774.298	6169.57			555	1742.21	-48.5326		588	15.3882	978.928			647	97.2766	102.964		719	1967.77	532.318			590	15707	869.63		648	863.847	264.915
	643	60.0312	244.031		563	1682.56	65747			676	1220.12	638.599		611	333.672	3500.55			556	905.342	-13		589	2629.25	773			648	5366.05	1353.95		722	3326.36	581.625			591	753.36	-33.7426		649	465.574	200.382
	644	264.667	167.49		564	2291.75	1727.4			677	-22.6818	56.9318		612	648.855	459.507			557	855.722	-27.7222		590	1393.74	43.7794			649	2170.38	51.8125		724	2461.06	1096.44			592	548.664	166.737		650	601.708	31500.5
	645	647.144	42593.2		565	322.028	6531.09			678	1226.36	670.16		613	538.25	79.9167			558	722.333	53.8095		592	520.875	119.109			651	1430.91	835.636		725	5838.58	2035.32			593	1880.43	143.018		651	1408.25	646.875
	646	1826.46	1119.18		566	1064.62	6691.7			679	784.836	176.5		614	2292.35	2829.6			559	775.888	17.5125		593	-40.1579	1997.72			654	3902.07	181.382		727	4880.74	2661.06			594	579.898	114.383		652	757.431	142.487
	647	465.74	195.969		568	701.119	3679.27			680	357.521	320.792		615	491.478	799.261			560	25.2647	0.826923		594	1628.79	211.167			655	1492.22	-100.917		728	1364.68	56.0197			595	1665.1	50.8529		654	730.529	251.373
	648	1629.73	874.177		569	1200	4554.83			682	342.182	142.818		616	108.342	1365.53			561	918.46	6.5625		595	1543.74	51.1053			656	873	103.25		730	1827.42	300.211			596	648.934	384.822		655	554.286	28562.9
	649	3442.56	992.706		570	922.837	5647.71			683	1079.01	1024.99		617	345.921	232.961			562	589	29.25		596	-5.85526	927.586			657	4024.58	436.432		733	591.711	210.422			597	1508.32	250.691		656	1449.43	263.647
	650	891.5	110		571	172.445	14327			684	1702.49	768.462		618	204.156	1888.34			563	59	15.5		597	-140.333	5432.5			659	8500.72	381.219		734	4972.33	726.516			598	5088	4162.62		657	1062.1	484.043
	651	103.674	7701.96		572	212.904	18802.3			685	3959.02	1795.51		619	2087.61	9562.12			564	631.184	21.4211		598	-63.7292	1524.17			660	1413.49	45.5921		737	3039.79	535.303			599	5376.85	1402.31		658	504.672	198.397
	653	3489.17	1035.62		573	841.348	4494.67			686	1768.14	572.152		620	812.908	608.092			565	717.632	-19.5		599	2869.06	197.926			661	2409.63	293.283		738	988.667	-12.3333			600	29109.2	2313.28		659	4215.22	865.696
	655	1336.21	1380.58		574	603.022	4152.89			687	500.632	671.553		624	2320.73	3849.65			566	124.85	-23.2		600	1529.57	73.3929			662	1102.22	43.9688		739	6970.64	1380.8			601	1562.03	119.787		662	10986.8	2833.36
	656	985.823	30179.5		575	892.87	6117.4			689	2147.3	713.304		625	428.408	3282.11			567	-3.7125	1.575		601	754.316	646.289			663	1092.12	50.0588		740	1098	359			602	6508.45	333.693		664	727.632	30.3824
	659	3564.07	5616.82		576	1010.25	4974.96			690	558.7	2184.44		626	416.155	4823.34			568	1080.01	4.27941		602	-10.288	818.25			664	847.794	64.2059		741	3216.85	540.49			603	15271.4	1189.12		665	3051.26	1574.3
	660	1858.84	919.94		577	1619.46	10095.1			692	1203.55	181.109		627	55.875	1608.75			569	1682.12	15.9671		603	-34.6316	1692.37			666	1376.47	238.947		742	1804.83	436.861			605	2372.34	-212.108		666	744.368	166.147
	661	736.941	327.89		578	1807.93	3421.57			693	4014.93	1991.02		628	200	1718.06			570	1195.62	9.875		604	5386.51	642.737			667	913.711	25357.1		744	4527.03	627.401			606	3266.5	374.278		667	1342.46	589.32
	662	-260.074	37428.8		579	49.3214	16201.4			694	1588.41	486.815		630	690.09	625.903			571	1520.03	4.07353		605	15.6087	1309.48			668	2434.98	232.358		745	2815.76	2190.03			607	4638.75	584.16		668	500.309	694.526
	663	1503.38	1854.97		580	720.346	3659.92			695	1604.7	605.9		631	1865.94	1474.45			572	256.049	13.288		606	2508.5	565			669	3186.08	4166.74		746	22424.6	2712.18			608	1662.64	-32		671	713.688	241
	664	761.665	153.568		581	51.7586	38308.7			696	533.333	644.778		632	1056.05	3984.56			573	708.611	-6.01389		608	124.664	317.605			670	2389.92	240.207		749	2056.47	321.173			610	2050.14	273.303		672	594.947	1360.93
	665	3793.56	1299.16		582	1077.11	4551.73			697	500.671	206.618		633	1952.11	19078.9			575	1008.07	-24.1974		609	-4.625	538.705			672	2653.86	134.452		750	1103.87	244.421			611	3471.18	262.409		673	2082.52	14589.1
	666	1637.75	456.487		583	-48.6518	7309.15			698	2053.4	545.875		634	705.658	1039.78			576	490	-11.6		610	-51.1579	1405.42			673	2448.61	324.52		751	3753.94	488.079			612	5792.44	153.222		674	1413.79	536.789
	667	548.062	6225.59		584	665.806	36789.1			700	1525.23	129.045		636	339.011	404.608			577	1738.47	20.2353		611	-38.1711	585.934			674	1201.89	-60.5132		753	1140.6	272.074			613	7081.4	1023.67		675	407.062	300.469
	669	1590.25	747.75		585	1147.28	23096			701	82.7303	1675.69		637	842.237	857.921			578	1147.84	-25.95		612	-37.7895	1001.16			675	723.633	153.1		754	1964.36	72.9583			614	561.921	289.224		676	1801.25	851.625
	670	1412.75	1320.1		586	2032.8	5431.83			702	1652.25	2749.67		638	975.13	5710.72			580	846.714	-6.14286		613	-2.84722	573.542			676	389.472	15885.1		756	1210.32	334.474			616	1786.23	179.554		677	672.757	179.309
	671	2722.38	1280		587	2385.98	24906.9			703	290.125	362.417		639	520.487	5341.6			581	1199.88	51.5		614	-10.3421	846.053			677	749.531	62.6687		757	2448.72	191.066			617	1148.42	50.7368		679	589.656	131.688
	673	657.479	282.965		588	1480.29	10368.7			704	718.272	152.14		640	3887.73	2748.91			582	912.296	26.6776		615	-23.2083	965.667			678	1173.63	181.099		758	9268.18	1538.93			618	1168.51	72.7798		680	564.471	238.471
	674	1038.58	268.994		589	973.318	5619.28			705	312.526	272.289		641	827.712	7414.88			583	610.472	15.3889		616	-82.0921	1964.97			679	1083.75	-31.5		760	5692.75	1125.76			619	2725.76	969.182		682	954.009	6185.68
	675	3865.78	2400.11		590	340.049	974.317			706	686.697	48.7763		642	565.987	409.434			584	-17.7625	10.9		617	-44.9375	1230.45			680	1240.12	120.068		762	1529.57	314.088			620	831.611	125.167		683	1368.28	22778.9
	676	3392.26	656.709		591	923.395	18245.3			707	2608.7	789.068		643	467.684	5348			585	608.25	-21.25		618	1262.04	1118.3			681	1418.5	29.4722		763	2220.76	456.276			621	1327.5	187.661		684	1386.7	2867.57
	677	496.864	465.773		592	913.575	2792.67			710	580.842	516.895		644	761.533	935.612			586	814.764	53.9375		620	-123.031	4430.41			682	1541.07	115.263		766	556.539	34.2188			622	617.938	-355.719		687	1082.74	957.914
	678	936.821	289.516		593	1253.2	44574			711	1887.21	610.75		645	488.434	293.342			587	1016.6	-39.7381		621	13.2656	1214.52			683	3528.7	126.472		767	1026.75	11.7895			623	7236.95	424.406		689	1146.32	504.091
	680	1667.86	412.375		594	202.143	51808.3			712	2287.9	608.152		647	1336.1	1567.82			588	640.846	-17.35		622	-54.2935	2753.15			684	1830.25	78.0221		768	844.409	20663.6			624	24.4	-120.05		690	1305.98	490.178
	683	876.281	551.906		595	591.73	3883.21			713	1197.39	365.965		648	284.245	2824.39			589	1127.03	3.29861		623	-74.2368	1996.19			685	823	42.1053		769	4825.53	993.141			625	6122.86	1920.91		691	399.923	387.768
	684	514.313	26383.1		596	4976.25	16945.9			714	429.803	266.118		650	1656.27	4054.1			590	869.5	-36.1625		624	770.456	-16.1765			686	6418.16	1924.18		770	2625.78	580.047			627	16434.7	3211.77		692	662.588	262.309
	686	1335.17	889.632		598	1123.33	4054.51			715	1443.98	620.103		651	1033.03	6647.21			591	6.95	1.3		625	745.605	40.2368			687	1723.01	244.044		772	1794	564.458			628	19961.7	1846.78		693	682.35	3414.88
	687	1506.38	1544.12		599	278.74	12092.6			716	1559.84	976.605		652	524.451	240.701			592	832.8	2.6		626	1062.03	85.625			688	4689.84	212.184		775	1879.02	616.539			629	1533.01	120.423		694	1020.33	447.762
	689	1350.88	391		600	1754.47	12392.7			717	1257.83	425.576		654	413.179	459.772			593	115.067	-5.3913		627	1109.32	50.8971			689	4002.71	241.421		776	662.625	105.783			630	5253.17	831.167		695	723.82	4111.14
	690	2456.9	260.284		601	2388.12	12084.3			718	432.23	1474.91		655	253.26	2169.16			594	1723.5	15.4167		628	-97.7609	1006.34			690	903.445	36.1094		777	1013.71	23.6667			631	1184.81	21.5625		696	513.037	73.2721
	691	4229.33	1199.82		602	1419.07	12792.3			720	458.569	240.757		656	166.37	1876.8			595	88.2375	1.9125		629	-39.6316	3414.62			691	550.031	308.438		778	918.743	285.956			633	7640.88	331.422		697	482.921	226.211
	692	2954.81	680.112		603	1584.87	6294.16			721	1861.21	762.806		657	719.188	880.146			596	668.461	29.4474		630	-98.5682	2579.66			692	1887.6	179.743		779	1176.87	1322.05			634	677.9	4750.4		698	8543.38	5747.17
	693	672.566	66.6567		604	690.85	4092.91			722	1498.48	363.5		658	370.801	560.511			597	504.375	30.8026		631	-15.875	1294.34			693	3045.47	196.849		780	1539.74	409.932			635	4907.52	-69.0163		699	545.167	238.104
	694	1175.54	406.837		605	972.275	52600.6			723	824.66	201.387		659	749.261	777.478			598	2572.34	39.0625		632	2164.14	37.375			694	1131.74	119.474		782	1435.19	150.125			636	981.375	117.562		700	852.234	877.902
	695	550.793	1119.27		606	1087.38	6370.35			724	3107.79	1397.68		660	125.75	1778.5			599	1169.14	-20.1477		633	17.7368	1221.31			695	1795.3	138.197		783	3127.95	342.961			637	703.184	309.816		701	1552.18	1188.21
	696	3589.94	7041.34		607	206.787	9997.41			725	1021.52	933.554		661	1048.67	1216.62			601	963.373	3.26875		634	-27.825	5122.67			696	940.906	110.031		784	4525.83	836.329			638	957.5	-54.375		704	581.494	397.909
	697	1075.49	1046.12		608	2235.73	19131.5			726	1570.46	838.062		662	97.5789	1046.36			602	642.618	6.48529		635	37.055	1736.08			697	1361.28	107.421		786	1255.77	161.333			639	5984.97	2930.93		705	9246.81	2851.47
	698	3197.62	535.127		609	4941.67	8274.71			728	5199.16	1246.28		663	744.928	875.559			603	920.367	1.88281		636	797.353	20.7647			698	1042.75	-13		787	785.556	113.333			640	1517.73	77.4013		706	1030.91	703.25
	699	811.066	724.184		610	22.5721	8749.02			730	2338.43	613.279		664	851.741	9099.44			604	1140.6	34.275		637	-25.4276	593.5			699	8177.64	490.16		788	1893.7	330.403			641	989.25	83.9577		709	956.04	295.5
	700	1309.2	367.852		611	1499.78	72706.5			731	1928.25	1970.72		665	835.221	6338.94			605	737.906	51.9375		638	-12.9402	1313			700	2565.7	179.651		789	815.154	479.39			642	2148.3	40		710	378.474	318.105
	701	3104.04	627.897		612	1923.85	9672.07			733	1465.88	314.158		666	214.694	184.826			606	1550.39	35.3092		639	102.692	3550.66			701	4469.39	385.56		790	1614	193.684			643	8229.74	725.287		712	879.788	276.513
	702	3736.99	963.83		613	-6.5	22858			734	2776.45	851.605		667	296.139	202.278			607	1302.81	57.225		640	-85.7632	3416.87			702	1166.77	75.6324		791	607.319	227.264			644	723.299	189.069		713	1141.67	196.417
	703	3688.37	6149.17		614	1462.08	7110.36			735	3031.33	1429.78		668	445.625	3246.25			608	655.091	21.875		641	-8.42105	990.066			703	5199.66	345.092		792	724.611	70.8611			645	1516.84	103.76		715	1999.83	1690.16
	705	903.6	314.475		615	915.556	76433.1			737	351.446	421.339		669	368.312	3718.94			609	631	51.3333		642	-54.0288	2264.06			705	1490.39	101.188		793	1567.28	137.625			646	509.04	9936.15		716	447.046	1927.2
	706	1146.67	1664.92		616	871	72381.9			738	443.617	84.2656		670	749.69	671.016			610	126.392	-3.72059		643	4.29167	1086.17			709	6497.09	403.719		794	792.869	503.345			647	915.75	183.458		718	399.829	547.447
	707	1271.09	1123.39		617	1078.3	3241.79			739	603.092	432.211		671	637.861	7089.57			611	501.25	8.25		644	-15.4342	731.618			710	7618.07	1903.81		795	1588.12	241.042			648	850	20.5882		720	542.109	167.703
	708	3789.27	1830.12		618	-3.8125	16348.7			740	2886.8	683.703		672	1453.07	4078.49			612	1172.41	-7.08088		645	2408.34	208.474			711	803.535	114.688		796	3150.25	351.375			649	1762.66	165.947		721	872.676	135.324
	711	2976.84	515.302		619	586.025	1794.95			741	1200.38	172.625		673	678.385	7504.41			613	467.543	19.3015		646	-83.2	1896.4			712	1338.72	130.059		799	3089.91	1131.91			650	463.868	865		722	1541.62	1605.75
	712	652.864	37.3182		620	144.869	9028.32			742	1102.91	484.171		674	192.888	1937.18			614	1055.59	45.0588		647	625.5	26.4412			713	2232.97	131.48		801	1113.28	762.022			652	1409.51	103.162		723	385.25	238.75
	713	1387.09	337.531		621	967.354	27818.4			743	336.553	946.658		675	548.401	675.421			615	651.819	-3.98125		648	1095.13	23.4868			714	972.529	72.2941		803	155.15	14460.3			653	3579.87	144.886		724	536.554	459.018
	715	632.909	8069.89		622	509.054	20107.2			744	961.671	827.888		676	757.408	1383.94			616	77.6977	-13.5		649	1011.86	89.4079			715	1336.75	45.875		804	579.972	63			654	3207.26	157.151		725	916.188	30208
	716	1049.74	295		623	593.392	11517.5			746	1370.77	269.618		677	308.211	337.026			617	489.618	4.21053		650	564.529	44.6471			716	755.333	142.667		806	491.94	-5.95652			655	846.551	13.0368		726	545.535	20397.9
	717	2221.3	2654.44		624	77.0417	18892.4			747	1198.86	450.889		679	873.462	8736.69			618	1517.74	53.5658		651	-36.9375	1410.81			717	20587	1022.26		807	3941.32	750.842			656	1787	125.833		727	805.882	277.059
	718	313.05	8563.4		625	1663.83	8650.93			748	302.113	189.024		680	248.266	2042.97			619	527.85	-8.6		652	-38.2105	1636.16			718	1384.76	115.275		808	1185.5	-4			657	1960.92	145.895		728	314.631	3826.6
	720	3030.38	1133.85		626	1442.76	7335.33			749	1026.42	280.842		681	648.053	727.526			620	1466.9	-26.85		653	78.3864	1782.41			719	1246.97	122.5		811	1523.5	-106.5			658	2309.74	37.3158		729	1713.86	3460.21
	721	419	174		627	614.1	2610.09			750	540.888	86.9013		682	832	8233.88			621	801.713	5.92647		654	-122.692	5355.38			720	1732.19	-590.15		813	1488.95	243.024			659	4058.03	863.441		731	1617.5	829.592
	722	2003.04	576.5		628	1134.8	6183.5			752	1235.7	1136.47		683	282.237	2288.89			622	457.65	4.7		655	-52.2368	1825.29			721	1344.85	55.6912		814	846.187	220.5			661	1325.99	215.963		733	5421.69	3070.46
	723	2252.98	845.739		629	2577.6	57070.4			753	1127.38	194.513		684	376.375	310.539			623	1091.17	60.6016		657	-97.8684	1927.75			722	6101.18	313.553		815	1920.72	332			662	1659.91	130.232		734	2254.16	1616.19
	724	1148.5	160.137		630	230.913	14565.1			754	3037.21	345.684		685	263.037	195.067			624	1946.56	29.8036		658	-51.463	7774.46			723	1180.61	132.22		816	3107.69	284.905			663	3064.1	43.8295		735	413.951	141.639
	725	2102.12	808.21		631	542.464	19776.1			756	494.105	17.4211		686	991.25	945.375			625	9.2	11		661	142.904	6391.33			724	13558	936		819	1241.99	210.963			664	1774.24	88.4583		737	616.594	2256.44
	726	1850.5	727.7		632	827.179	5294.43			757	289.184	55.6103		687	540.804	5071.22			626	1110.02	19.9737		662	-15.4671	2142.55			725	2657.53	170.849		821	1363.21	3833.65			665	1464.5	-14.9792		738	3365.07	1104.03
	727	961.25	32922.2		634	89.037	11531.7			758	1504.66	1241.82		688	1840.31	1960.65			627	1103.46	65		663	-110.5	5398.24			726	923.737	53.9539		822	500.727	17725.5			666	237.491	12474.3		741	1282.88	7589.14
	728	1018.65	1038.65		635	1045.46	5827.46			762	433.645	110.526		689	406.603	114.926			628	1050.84	117.842		664	-68.9327	4929.09			727	1195.26	74.0526		823	772.474	1022.75			667	32126.9	5712.68		742	2636.48	8575.22
	729	1237.38	692.75		636	1057.2	7809.44			763	1868.81	3839		690	511.408	208.309			629	647.344	71.0625		666	-7	5160.2			728	461.735	24.1176		825	488.125	26504.1			668	3966.62	132.026		743	989.722	540.889
	730	2981.04	1890.93		637	2929.91	11556.9			765	192.368	2102.69		691	896.804	641.587			630	464.424	10.1528		667	-61.2554	1040.27			729	1081.82	20.9868		826	3531.98	192.188			669	721.25	238		745	566.34	453.34
	731	3079.94	1176.45		638	1831.15	4790.04			767	2461.34	1113.63		692	3026.4	4484.22			631	789.007	-28.3958		668	-49.2609	2005.15			730	8883.92	682.202		828	310.163	14071.7			670	4491.52	534.326		746	416.139	4881.58
	734	2715.75	1610.87		639	3978.17	38367.2			768	874.842	180.632		694	230.211	2679.47			632	66.8276	2.23333		669	1796.71	81.8421			731	1813.5	52.25		830	1070.71	110.471			671	2389.58	136.125		747	1007.31	185.574
	736	102.842	7551.24		640	2260.62	3628.42			769	1758	346.875		695	219.13	1806.11			633	493.562	38.5937		670	1368.34	94.4605			732	2145.32	233.473		831	1413.39	367.25			673	29187.9	2033.13		748	1593.66	319.402
	737	2093.22	370.58		641	1092.5	6725.9			770	435.579	231.737		696	449.153	575.136			634	775.719	-15.125		671	643.969	1657.35			733	4460.88	306.528		832	830.875	118.625			675	0	0		749	454.661	2336.11
	738	2878.81	989.788		642	935.214	7635.36			771	1512.2	995.9		697	429.156	4646.03			635	-13.65	6.4		672	-70.5833	1220.9			734	1165.56	134.062		833	2280.95	459.198			676	4911.64	467.987		750	1626.49	823.119
	739	1893.7	700.367		643	634.25	2734.64			773	68.9408	1196.83		698	2033.11	1572.62			636	300.694	9.51042		673	-26.5114	904.682			735	7190.93	469.528		834	93.65	9982.91			677	0	0		751	517.75	8163.19
	740	1069.78	385.836		644	489.887	1474.46			776	665.414	85.5526		700	572.608	564.307			637	721.854	-7.65625		674	1355.36	71			736	1628.86	43.1818		835	1214	239.875			679	2738.32	67.4737		752	5350.52	4503.81
	741	3870.36	1882.3		645	3791.38	37526.9			778	2793.1	2994		701	666.553	802.855			638	5618.72	253.23		675	2671.31	168.313			737	2083.11	99.5294		836	1170.44	171.778			680	981.201	15.9155		753	1388.97	4077.44
	742	1792.38	604.61		646	656.855	2432.59			779	1550.36	393.375		702	338.403	344.535			639	913.675	7.13333		676	-2.43478	1591.45			738	4154.29	335.447		838	8824.25	192.987			681	896.359	81.2734		754	716.983	840.5
	744	2721.84	578.984		647	1317.48	6080.39			780	1659.72	207.181		703	750.125	8746.79			640	321	30.2		677	-94.2065	1424.55			739	481.094	85		841	1437.45	776.182			683	625.328	119.828		755	811.622	33373.2
	745	641.844	246.406		648	2171.21	25738.6			781	900.105	262.053		704	107.199	2072.87			641	658.812	-29.625		678	5	6			741	2422.36	308.02		846	1083.6	3334			685	2975.88	1597.97		757	5670.17	1383.85
	746	931.216	898.523		649	1089.69	9121.35			782	1013.59	247.75		705	433.953	487.109			642	4866.75	73.6		679	226.131	144.488			742	1221.29	213.524		847	572.722	119.889			687	1382.12	108.3		758	572.684	361.184
	747	2209.55	829.365		650	268	10938			783	1293.07	320.595		706	1273.19	1208.77			643	199	10.0588		680	-21.9583	1385.62			743	1966.88	-36.9583		848	395.044	12031.2			688	2009.32	77.4737		759	982.766	2389.68
	748	876.494	181.54		651	709.013	1534.72			784	108.826	1518.78		707	2352.65	23125.5			644	553.895	-3.68421		681	-11.6471	923.882			744	3263.31	102.563		849	4178.42	601.368			689	672.225	136.438		760	573.188	2133.19
	749	4009.87	3452.51		652	248.315	10222.7			787	753.316	302.895		708	1717.57	2709.54			645	625.471	-20.7647		682	-31.8026	2873.99			745	700.625	90.8824		850	684.827	183.518			690	811.312	83.1875		762	521.87	1255.98
	750	614.176	2052.38		653	2267.95	38068.1			789	969.895	116.842		709	359.875	3089.62			646	612.382	-1.39706		683	126.513	-0.1			746	1186.31	279.333		851	6974	1048.27			691	899.697	27.1711		764	1555.72	430.572
	751	787.838	3054.23		654	520.35	615.949			791	989.815	438.152		710	564.197	4911.37			647	481.831	-20.1812		684	-64.6316	1671.39			747	3684.67	274.667		853	473	60.75			692	865.667	-100.333		767	6681.17	7084.24
	752	4807.65	2287.79		655	269.104	11199.1			792	186.75	1764.82		711	692.868	985.68			648	654.325	-3.375		685	34.1875	617.825			748	3645.36	595.553		854	1179.36	95.5278			693	3244.54	195.237		769	1070.96	504.542
	753	3321.42	1204.42		656	786.435	3987.78			793	2241.52	487.678		712	3324.83	3627.89			649	294.712	6.1		686	5.78409	697.034			750	952.743	-2.51974		855	1309.19	327.81			694	1536.5	136.125		770	2921.62	2873.5
	754	1397.83	579.898		657	1011.24	27173.1			794	3593.43	1860.72		713	1057.16	1240.26			651	931.833	-56.0556		687	-57	2057.21			751	17100.8	1288.92		857	1975.52	9192.36			695	1159.4	66.3015		771	444.36	272.294
	755	861.175	1090.44		658	271.634	10408.1			795	1000.5	257.222		714	1340.59	2413.12			652	2136.17	-4.26087		688	-82.9135	6173.79			752	3916.7	333.587		859	1502.25	321.6			696	715.105	101.138		773	2259.38	2346.88
	756	2057.02	102.446		659	886	37407.2			796	1742.35	458.176		715	400.684	416.737			653	882.821	-1.66667		689	-54.8947	1103.42			753	1045.58	199.667		860	2910.57	703.963			697	5752.57	73.8125		775	233.174	13986.6
	757	673.195	5074.76		660	2067.26	52883.6			797	728.772	196.449		716	470.875	752.98			654	532.625	-32.1875		690	10.0556	908.833			754	1152.93	136.286		861	1383.84	535.145			698	1594.62	-17.6471		777	455.519	18540.7
	758	3014.15	1005.43		661	766	2952.19			798	1183.5	98.1842		719	2740.06	19255.2			655	1329.54	-29.9722		691	1277.62	470.483			755	1215.81	115.215		863	940.125	151.25			699	2175.45	171.237		778	1263.63	231.012
	759	1142	388		662	945.067	13657.3			799	139.98	1917.2		720	397.25	540.652			656	23.25	-6.375		693	-41.7	1852.92			756	1596.09	32.5455		864	3333.79	485.789			700	3234.31	-698.408		779	423.793	667.016
	760	1389.67	280.25		663	1362.4	7734.41			800	390.914	125.062		721	443.303	212.684			657	1532.56	51.6875		694	-19.1053	1084.42			757	1863.11	143.961		866	3596.38	399.833			701	2701.27	420.141		780	680.368	3108.37
	761	2855.39	21618.8		664	676.125	2589.92			801	441.599	134.638		722	1151.06	1048.61			658	1122.5	-15.4659		696	787.917	16.0833			758	1368.75	68.75		867	2130.05	203.316			702	1901.38	26.1831		781	804.715	11.0556
	762	580.559	834.921		665	3397.69	33147.6			802	1264.5	177		723	1738.62	2081.61			659	46.6813	1.93478		697	1133.48	-101.143			759	2474.26	234.842		870	1337.32	1343.61			703	429.171	221.829		782	682.5	6573.59
	763	457.576	82.4444		666	1792.12	6630.59			803	1056.54	629.579		724	2709.29	4988.96			660	8.125	-0.443182		698	435.609	11448.8			760	1594.17	238.934		873	1181.9	1254.09			706	777.2	56.85		783	389.625	12270.4
	764	919.708	331.292		667	827.19	2583.86			804	621.375	125.862		725	1293.44	12529.6			661	190.162	-39.7125		699	2405.85	14.8562			761	914.025	40.975		874	3474.74	1915.09			707	2371.88	205.574		784	4545.18	1935.77
	765	513.531	313.062		668	1806.76	44654.8			805	2010.38	588.906		726	480.667	6037.98			662	78.5435	-5.8125		700	-65.5114	1430.2			762	771.833	20.25		876	841.015	125.184			708	1108.54	127.566		785	470.289	230.237
	766	1108.93	416.136		669	1969.2	12811			806	5582.9	1335.08		727	320.395	4250.32			663	540.65	36.1		701	424.441	391.118			763	3018.23	349.518		877	6123.62	1258.43			709	4267.94	525.083		787	3190.38	741.5
	767	4239.11	1076.56		670	2203.33	12249.8			807	4574.13	1389.84		728	697.952	6363.43			664	892.906	-32.1094		703	-9.875	792.278			764	5631.06	902.523		878	641.737	374			710	672.25	54.25		788	3497.94	659.191
	768	4357.09	2007.41		671	809.84	38366.9			808	991.042	593.146		729	204.625	187.421			665	-56.1667	-47.05		704	-46.2105	2450.72			765	1225.26	214.706		880	767.056	80.6042			711	1192.93	499.026		789	777.24	2464.06
	770	1875.75	739.5		672	922.942	6072.81			809	543.875	92.6776		730	433.708	149.292			666	1250.24	43.2368		705	964.333	83			766	972.875	59.4297		881	631.789	205.48			712	4143.56	435.56		790	875.283	256.533
	771	1804.95	487.951		673	721.025	1942.48			810	1662.82	440.96		731	1511.46	2068.6			667	885	-7.4		706	392.776	178.914			767	7216.41	1080.78		882	1379.27	247.479			713	755.471	68.7794		791	2510.12	2349.64
	772	2083.56	499.594		674	746.85	4448.21			811	1059.59	96.6786		732	327.875	241.134			669	811.307	8.79605		707	1453.53	-10.7647			768	821.469	42.5781		883	4953.89	1070.53			714	1097.82	203.809		792	2394.96	2029.9
	773	912.5	279.292		675	472.958	7732.02			812	4582.46	3936.64		733	979.565	9813.82			670	736.831	-18.7647		708	-14.2368	983.428			769	1381.33	-1.88732		884	1582.26	769.053			715	4637.81	29547.9		794	1122.65	1153.16
	774	1068.79	318.408		676	583.438	74753.7			813	374.583	98.9286		734	1008.76	11821			671	734.5	-26.5		709	31.3261	2047.07			770	1102.36	-69.7763		885	11566.7	1574.35			716	5505.56	2581.3		795	540.473	818.576
	775	742.949	555.757		678	504.625	1050.19			815	2094.49	529.599		735	753.391	3591.25			672	791.111	-10.5556		710	34.7778	1145.11			771	828	105.4		886	706.2	7018.45			717	2217.01	289.333		796	7268.25	4760.5
	776	1728.04	793.163		679	2680.42	11603.7			816	5148.48	2696.14		737	415.046	197.882			673	681.868	29.1316		711	-194.148	11278.6			772	3521.28	1061.6		888	1536.26	217.961			719	1320.24	39.8676		798	681.198	2944.97
	777	1505.55	320.1		680	1005.77	20134.9			817	864.526	133		739	215.421	2740.05			674	13	-3.54412		712	795.778	18.8889			774	1694.06	145.625		889	3623	557.554			720	1014.16	202.211		799	1254.36	348.203
	778	1039.95	207.45		681	724.667	3327.13			819	4034.82	495.789		740	1003.16	8990.85			675	1047.12	28.125		714	-41.1579	1071.92			775	8501.05	507.368		890	1606.74	69.2857			721	838.342	-61.5		800	517.844	13426.4
	779	663.239	554.159		682	610.06	11135.3			820	2038	259		741	319	284.789			676	906.156	6.3125		715	-129.5	4508.21			776	1217.22	247.671		891	443.96	5390.67			723	3607.6	7725.93		801	678.953	104.548
	780	1025.54	171.81		683	1111.74	62954.9			821	6135.3	1451.78		743	187.211	1826.76			677	381.475	-6.9875		716	-138.521	2539.46			777	5485.34	343.803		892	11462.9	1321.24			724	2194.32	59.5789		802	439.722	31.6338
	782	1747.43	446.786		684	1169.53	10238.7			822	1144.34	460.763		744	248.156	2397.51			678	138.545	-26.4615		717	-7.13816	889.316			778	1403.78	-20.1429		893	868.684	109.132			725	780.867	55.5859		803	709.875	212.562
	783	2756.91	953.545		685	277.509	15453.3			827	1240.48	163.84		745	752.722	7503.28			679	2068.05	77.25		718	-57.3693	1170.99			779	19668.9	1307.71		894	2869.12	227.125			726	2888.35	145.2		804	1357.72	476.64
	784	522.062	84		686	702.375	2632.07			828	120.978	1601.86		746	2173.53	3776.98			680	751.868	5.07895		719	7.26316	729.276			780	1552.44	-73.8125		895	889.651	1071.98			727	1549.6	122.286		805	414.647	156.647
	785	3333.52	9191.45		687	1447.58	39807.9			830	496.806	69.2778		748	562.542	590.021			681	674.061	10.7647		720	1174.26	202.066			781	1900.72	69.9671		896	669.118	136.007			728	4743	2234.2		806	5786	2220.5
	786	2848.95	371.638		689	1358.49	6121.22			831	1412.8	630.224		749	306.526	167.592			682	80.4872	-3.825		721	3725.29	371.857			782	2213.76	293.763		898	1034.46	30792.6			729	1653.15	217.037		807	850.097	263.257
	787	857.289	463.237		690	1147.86	1929.87			833	112.375	1113.06		750	706.23	5008.55			684	45.4651	1.51136		722	-59.8152	2060.84			783	667.676	115.735		900	1657.26	215.28			730	7370.95	511.134		808	930.953	1036.16
	789	601.536	26921.4		692	1086.88	5538.79			834	517	66.0156		751	699.522	1184.84			685	514.516	-31.7188		723	898.602	19.0859			784	3232.17	489.948		902	1063.9	241.167			733	517.875	168.062		809	510.538	1975.46
	790	202.75	9330.25		694	400.51	5253.48			835	351.037	589.235		752	179.632	2243.05			686	840.375	9.70833		724	25.35	2258.17			785	972.349	89.3421		903	7893.75	1185.3			734	1182.94	149.059		810	2103.8	1118.75
	791	290.237	210.737		695	1573.12	10236.9			836	614.355	836.132		753	197.368	2227.79			687	33.3	-12.1875		725	-58.5	1855.75			786	964.053	53.4474		904	1123.37	245.086			735	4544.81	290.85		811	829.368	23.6493
	792	1594.62	1012.12		697	687.65	3667.32			838	3777.27	1486.59		755	643.5	370.487			688	617.153	15.625		727	-19.6029	684.426			787	3147.16	214.645		905	1358.81	2598.6			736	1562.37	19.7895		812	313.25	137.048
	794	618.295	39026.8		698	1358.97	6836.44			839	549.588	42.8824		756	199.235	106.941			689	1416.13	56.9211		728	-23.5556	907.889			788	1167.62	2350.1		906	1441.9	81.0441			737	301.325	5964.68		813	1648.84	1189.84
	795	1863.74	523.304		699	2305.97	9342.78			840	2052.34	620.053		758	1229.09	406.415			690	685.556	-42.1528		729	11.1176	770.5			789	1058.08	135.597		907	1239.24	159.176			738	5135.5	1414		814	1206.6	1424.31
	796	842.65	34636.6		700	2051.17	14809.9			841	3342.27	946.362		759	1223.78	1089.62			691	1215.59	-33.1875		730	-22.4342	1309.17			791	1766.29	108.807		908	627.211	1499.97			739	2062.54	117.265		815	464.801	23804.4
	797	1632.82	172.88		701	703.094	3041.37			842	1743.46	487.323		760	2561.16	17806.8			693	182.825	-49.125		731	-53.663	2736.82			794	595.868	68.5329		909	918.118	60.125			741	61025.9	5529.3		816	1736.56	571.729
	798	341.917	39362.6		702	2511.99	8597.6			843	526.429	119.905		761	2522.93	2549.48			694	769.206	10.4044		732	-6.22826	2144.99			795	6310.78	1903.15		910	2471.02	828.152			744	526.229	5101.93		817	112.926	29067.8
	800	1464.75	566.5		703	1533.36	3254.8			844	663.533	77.8947		762	365.119	166.253			695	633.831	4.36765		734	-90.7663	1595.08			796	3813.45	187.592		911	12134.1	2134.26			745	478.895	38.5		818	789.75	-26.5
	801	934.95	436.938		704	508.42	11155.3			847	1085.47	136.861		763	225.908	3669.38			696	771.023	13		736	-154.174	7482.17			797	1476.25	90.1429		913	725.559	201.647			746	2250.03	235.704		820	3696.91	759.227
	802	895.632	407.809		705	3667.04	53484.7			850	1986.11	262.354		764	2461.09	2836.33			697	815.912	-53.6324		737	-36.5	1100.91			799	843.454	2023.47		914	551.155	384.458			747	865.73	44.8289		821	591.294	27861.2
	803	714.4	203.2		706	1521.19	8470			852	1139.61	312.947		766	711.961	468.342			698	28	4.6		738	1390.32	775.868			800	1065.24	153.882		915	1156.42	34054.8			748	902.562	52.4194		822	4683.23	1102.29
	804	1668.14	342.047		708	748.712	3467			853	608.199	178.154		767	205.967	404.664			699	867.085	40		739	-23.0625	3976.97			801	3675.92	1568.92		916	845.333	120.854			749	1951.89	157.368		823	561.633	45807.9
	805	1442.19	317.006		709	588.46	13211.9			854	630.729	116.812		768	314.895	4460.37			700	1268.7	-59.1776		740	-36.9583	1360.83			802	2623.07	-364.53		917	1110.82	226.472			750	3351.53	507.947		824	698.597	156.951
	806	1088.09	1040.19		711	1376.5	7233.27			855	1442.81	520.618		769	1164.84	2351.61			701	677.632	21.3684		741	-77.2105	2896.07			803	2321.59	187.75		919	1046.98	12294.5			751	1030.16	164.38		826	346	255.812
	807	3526.86	1768.97		712	2956.6	15424.1			856	815.292	174.472		770	343.141	157.422			702	887.319	56.6389		742	270.969	1421.52			804	952	134.5		920	2523.89	477.444			752	1096.72	70.5813		828	849	367
	808	4962.06	2417.77		714	1568.12	8934.49			857	384.394	206.394		771	2296.86	21109.5			703	44.8145	-4.42969		743	-88.0461	1620.03			806	2210.66	113.28		921	3539.19	501.966			753	1287.83	72.4444		829	1617.62	230.375
	809	3799.2	1373.2		715	2333.28	5660.31			858	4218.07	3276.32		772	2647.65	2260.54			705	1386.63	74.4737		744	-6	3716.33			807	2030.25	118.341		922	1744.55	276.636			754	7579.78	1166.32		830	402.863	396.143
	810	359.464	291.351		716	4188.17	9179.12			859	769.355	247.671		773	110.083	1265.48			706	927.559	15.6985		745	-39.5526	1046.11			808	1366.17	677.73		924	1975.27	409.113			755	3124.27	112.531		832	811.559	205.75
	811	266.222	6034.42		717	2142.28	11127.5			860	147.382	1933.38		774	334.164	172.031			707	1090.84	2.73026		746	26.7708	0.833333			809	802.796	113.375		925	2831.31	311.207			756	3075	386.914		833	1906.72	696.974
	812	2379.07	1442.18		718	1151.23	36193.9			861	1574.02	373.684		775	1589.88	2087.38			708	85.236	-7.28261		747	17.9306	2625.28			810	2999.68	139.382		926	1185.55	173.851			757	13.911	-10.4145		834	818.75	39934.4
	813	1427.09	396.853		719	830.25	27676.9			862	1045.91	264.826		776	650.101	9423.69			709	944.303	-40.5294		748	-173.096	4970.4			812	1139.66	129.875		927	603.12	7173.92			758	922.837	73.4625		835	2041.52	9085.93
	814	2385.31	324.115		720	3611.9	9424.05			863	289.656	31.7188		777	2771.74	9576.88			710	721.941	-0.0588235		749	-169.292	4347.54			813	5600.56	301.083		928	1833.01	260.243			759	939.603	160.831		836	1200.76	234.611
	816	4449.45	2082.53		721	1970.98	6068.77			864	1738.11	418.708		778	327.421	3109.32			711	623.413	28.1		750	31.8	2540.4			814	7623.29	632.07		929	2405.63	442.924			760	323.842	2453.89		837	1684.33	370.446
	817	2760.22	1466.94		722	796.031	2065.72			865	1258.57	217.799		779	1011.51	813.049			712	2020	-35.6842		751	101.138	734.086			815	1093.79	340.417		930	513.654	182.75			761	1296.38	271.375		838	530.711	4279.81
	818	745.312	577.652		723	693.413	3988.32			866	1041.88	262.763		780	847.296	7508.69			713	1286	55.4803		752	821.125	476.208			816	1772.33	149.164		931	278.601	17601.9			762	1781.54	88.0735		839	1985.96	1144.55
	819	978.847	126.153		724	1934.92	5201.52			867	648.053	259.816		781	791.914	1076.11			714	27.4421	-33.3646		753	-42.2566	1042.95			817	966.853	51.5882		934	1075.98	36393.4			764	1850.83	247.199		840	472.5	30727
	820	1775.92	43117.4		725	1764.69	9687.99			868	5591.83	2286.36		782	503.316	224.868			715	733.528	20.7639		754	-0.328947	632.691			818	798.176	118.338		935	1799.56	341.444			765	7443.75	1177.25		842	6035.69	3685
	821	3107.89	310.47		726	158.912	12208.4			869	1563.41	3189.94		783	186.342	1678.99			716	465.911	-8.3125		755	-27.4803	800.072			819	915.324	60.7941		936	717.471	160.088			767	57.8448	16055.5		843	402.455	6028.27
	822	1016.56	11432.3		727	951.774	11259.4			870	765.276	578.776		784	444.375	2072.81			717	38.3	-8.2		756	-36.0263	1902			820	14603.5	1456.39		937	1049.39	599.739			768	416.531	128.188		845	856.059	847.158
	823	1202.24	145.756		728	4886.14	24284.1			872	843.926	303.559		785	208.14	76.8824			718	778.324	46.0882		757	-40.75	1787.93			821	1564.46	9502.81		939	317.08	4687.12			769	3091.84	196.789		847	953.833	319.345
	824	3700.48	1566.67		729	739.713	14562.9			874	865.336	1090.74		786	1240.22	1422.48			719	666.278	-7.83333		758	-0.820513	-18.075			822	1430.8	54.2679		940	3414.4	680.551			770	1282.47	74.8824		848	962.652	4376.09
	825	482.429	10426.3		731	930.662	4205.45			876	684.545	170.153		787	1316.89	1583.32			720	736.324	-20.9412		759	-90	1877.68			823	3343.27	662.595		941	5643.41	906.414			771	800.283	2399.35		849	757.051	86.9318
	826	1565.53	290.947		732	1015.06	2710.45			877	636.125	61.9167		788	269.5	160			721	1017.23	-40.3333		760	-7.89062	1512.45			824	1013.03	39.3235		942	7977	1419.5			773	1137.54	128.417		850	2001.73	673.031
	827	3216.91	3154.35		733	4576.67	24940			878	530.757	490.697		789	797.618	744.868			722	72.4578	10.1818		762	876.667	9.25			825	2016.5	182		943	1601.25	265			774	638.359	2301.77		852	1081.45	1305.23
	828	463.919	204.469		734	2567.98	6304.27			879	1421.5	406.5		790	1455.65	13069.1			723	730.969	5.75		763	10.6974	575.421			826	2504.59	77.6133		944	806.313	151.938			775	3625.5	2658.67		853	3111.4	2063.62
	830	2418.12	440.55		736	2320.76	8846.72			880	1162.16	447.809		791	2140.93	21436.4			724	1327.03	109.369		764	2824.26	105.375			828	727.75	87.6618		945	986.342	455.132			776	8296.99	2511.2		854	639.654	158.75
	831	593.847	75.3819		737	1171.63	9860.3			881	2583.12	1111.99		792	145.188	2510.69			725	1015.15	39.275		765	-11.6842	765.75			829	3671.59	67.3696		946	5176.66	771.691			777	3798.06	612.58		855	401.7	2345.05
	833	4285.39	1212.84		738	135.286	20094			882	1749.25	193.062		793	1341.94	8788.45			726	1446.8	68.3571		766	-44.1316	1566.32			830	1738.25	152.75		947	1224.42	244.684			778	2681.58	239.982		858	787.868	169.294
	834	4905.25	2073.5		740	2678.64	52674.7			884	3500.16	1324.64		794	422.776	4699.25			727	643.875	-30.5		767	99.931	10898.8			831	716.921	43.5		948	1138.47	14.0987			779	541.854	222.111		859	1743.26	1129.42
	835	2638.46	25563.1		741	158.775	6779.66			885	674.065	152.674		795	2405.83	3692.95			728	1155.46	-23.6974		768	-11.4	3369.15			832	3613.59	340		950	1927.73	-17.1458			780	335.411	6419.53		861	558.556	118.271
	836	515	983.152		742	665.1	3759.39			886	379.208	15.0833		796	1323.42	15357.8			729	1038.25	-23.2188		769	579.188	2.6875			833	1260.53	-18.6471		951	894.526	205.763			781	1777.36	109.94		863	560.212	2268.81
	837	1444.71	392.571		743	4698	36760.1			887	271.079	354.967		797	358.448	2340.66			730	1921.12	39.0526		770	-10.5592	735.816			835	1124.65	56.1786		952	2414.26	553.62			782	4458.73	203.231		864	249	196.368
	838	1223.18	514.293		744	800.512	37826.9			888	2805.68	757.395		798	2759.94	23675.1			731	1252.7	-39.9474		771	-38.0789	1826.99			836	2044.96	146.02		953	2245.18	295.368			783	1285.83	86.8333		865	1944.12	568.625
	839	1762.46	1029.4		745	287.143	29485.7			889	243.966	300.034		799	487.868	245.201			732	99.825	-1.7		773	3218.32	241.067			837	3772.71	466.25		954	585.342	446.763			785	795.75	170.125		867	1402.36	367.381
	840	756.937	310.625		746	636.375	1900.72			891	2224.74	529.5		800	103.652	1100.65			733	592.722	55		774	4.49	2215.36			838	2096.53	202.474		955	1096.89	167			786	881.25	56.5873		868	1166.69	285.426
	841	1739.82	850.271		748	308.906	6242.52			894	2470.11	549.421		801	869.24	2219.56			734	660.469	-4.65625		775	62.4737	1102.42			839	2199.25	223.974		956	1325.36	188.944			787	2431.43	66.6974		870	542.333	176
	842	1434.35	483		749	110.538	12093.4			895	437.889	135.361		802	1641.19	1385.59			735	13.8438	2.09375		777	-0.916667	1126.71			842	1279.82	521.105		958	891.329	207.382			788	4376.41	424.682		871	1683.51	3990.83
	843	3092.38	2173.3		750	1494.23	8951.65			896	180.224	1684.79		803	148.184	1352.27			736	7.28977	9.61932		778	-12.4531	3160.69			843	1201.61	214.743		959	724.191	93.8382			789	1682.03	668.417		873	2141.38	695.691
	844	1754.58	399.174		751	1189.87	19850.2			897	149.039	1474.73		805	294.309	258.099			738	659.342	13.6842		779	-90.4211	2179.03			844	-14.8571	21.7917		960	702.667	141.049			790	851.756	395.333		874	415.585	2736.18
	845	-51.7037	7724.02		752	2257.17	14192			900	1272.64	682.276		806	415.132	177.824			739	1429.13	-11.5197		780	1827.62	81.375			845	8115.4	808.6		962	562.155	28054.2			791	20.2237	4930.94		875	1238.51	372.816
	846	1187.83	593.222		753	1234.37	23678.7			901	4003.66	2846.78		807	251.974	2562.63			740	716.842	3.36842		781	1646.31	157.938			846	845.43	76.1953		963	916.16	37544.5			792	972.515	237.485		876	2488.72	1363.54
	847	2098.96	1384.08		754	1365.8	5272.04			902	2719.27	368.975		808	2358.37	15658.7			741	571.365	46		782	1105.5	46.75			847	2260.01	39.3355		965	379.345	354.101			793	7492.15	575.692		877	673.961	442.237
	848	825.5	62.2985		755	1419.03	5771.42			903	966.342	386.237		809	580.797	523.734			742	699.656	11.4844		783	-47.1087	2239.54			848	1145.53	48.0526		967	4722.36	845.316			794	181.031	3822.23		878	1182.06	411.039
	849	584.776	1041.84		756	665.875	6747.09			904	1100.5	331.375		810	484.778	275.5			743	1227.88	-76.6875		784	801	0			849	780.958	44.75		968	2645.46	403.098			795	1081.39	423.804		879	422.632	2864.11
	850	3639.72	762.895		757	1293.72	10721.3			905	963.197	76.8947		811	234.828	2386.61			744	714.719	65.3438		785	-31.4474	884.553			850	5624.57	142.8		969	1355.76	7609.35			798	2143.38	75.625		880	609.277	30376.7
	851	1277.21	1007.45		758	830.188	3793.67			906	1020.75	238.659		812	1128.33	5838.96			745	1257	80		786	-28.9079	1096.82			851	1168.64	-32.2143		970	741.118	1268.86			799	899.722	130.833		881	3244.74	696.913
	852	1012.75	381.337		759	1175.59	5950.62			907	667.706	276.735		813	677.156	2250.79			747	1220.11	-22.2375		787	-8.05882	763.441			852	2736.66	296.033		971	10561.6	1841.18			800	3330.17	194.125		882	312.419	23.1
	853	1689.5	179.6		760	848.245	1665.57			909	1008.47	492.222		814	510.105	4947.85			748	783.553	-5.69737		788	-34.2632	1373.18			853	1880.21	158.699		972	2341.27	338.17			801	2303.13	42.75		883	285.163	4158.25
	854	1174.38	1159.78		761	1978.05	10446.2			910	350.693	497.648		815	970.889	8048.5			749	1087.92	27.2647		789	-119.75	1072.63			854	37889.5	3288.65		974	1362.17	626.625			802	1623.92	79.4405		884	148.236	6296.85
	855	2162.78	459.194		762	374.644	1705.92			911	839.603	140.243		816	323.294	302.794			750	3.7625	-5.5875		790	-72.125	2528.38			855	659.956	13.5735		975	1251.18	122.035			803	1147.43	104.309		885	1948.87	1074.43
	856	2006.04	2510.33		763	337.327	8300.59			912	4615.85	461.45		817	2193.27	22957.4			751	1313.62	-0.125		791	-61.13	2637.42			856	4593.72	522.521		976	1831.34	231.493			804	1055.56	136.375		886	448.474	145.474
	857	2354.84	376.349		764	832.538	2967.92			913	464.382	358.303		818	237.958	58.0625			752	1615.15	12.4545		792	-33.7105	2291.72			857	2639.07	319.471		977	2014.38	110.905			805	1790.07	360.261		887	1512.64	486.493
	858	342.24	1917.91		765	783.6	3165.61			916	3876.25	911.5		819	1497.28	1368.92			753	246.442	0.5		794	-68.5568	2464.14			858	4998	1207.12		978	1166.25	22			806	7925.59	844.799		888	1437.42	432.895
	859	1000.12	377.605		766	3573.4	12245.1			917	1167.5	161.937		820	197.292	2497.54			754	4474.83	24.4891		795	-100.382	2849.18			859	5737.86	483.349		979	2015.19	135.886			807	686.583	54.9167		889	244.1	10181.1
	860	397.487	147.829		767	1365.16	5992.83			918	675.934	280.329		821	88.6316	1179.16			755	27.8696	7.54348		796	4.63816	1052.59			860	1268.36	119.856		981	815.766	152.086			808	1797.89	97.9803		890	2343.92	3838.96
	861	4263	910.087		768	737.413	3098.32			921	575.837	332.217		822	716.454	755.06			756	1546	23.5511		797	-61.5987	1581.36			861	1342.62	-28.8125		982	9434.1	804.885			809	677.656	80.4688		891	307.981	11941.1
	862	2478.2	837.841		771	525.676	12983.7			922	1302.97	425.224		823	632.777	1170.88			757	1058.92	-22.0486		798	-8.31818	1051.19			862	2352.34	121.763		983	1100.32	295.08			810	815.154	-62.0597		892	520.449	14828.3
	863	4303.59	1399.19		772	1097.86	6944.73			923	2991.01	1588.23		824	378.816	3453.12			758	495.725	0.1625		799	-29.2917	2846.04			863	1137.33	-74.7324		984	1238.32	136			811	706.25	80.3125		893	2132.86	816.197
	864	1813.39	-25		773	335.042	18523.9			924	102.111	1269.56		825	244.342	1571.17			759	1681.47	-46.7727		800	-38.7368	1037.76			864	5668.18	838.38		985	1164.7	86.3618			812	1002.75	28.7342		894	716.972	417.819
	866	4266.6	2522.21		774	1059.01	4165.56			926	3715.07	1873.29		826	247.329	2626.76			760	1434.88	35.2941		801	-80.7065	2520.62			865	898.75	102.531		986	682.382	89.0903			813	4640.78	187.583		896	129.074	11050.3
	867	2165.18	568.979		775	1145.93	3073.19			927	447.224	243.25		827	414.154	3778.18			761	1173.19	26.625		802	76	2458			866	1877.63	157.632		987	695.133	129.492			815	1525.5	70.5		897	2446.8	1305.88
	870	266.25	11210.5		776	887.031	3648.34			928	200.73	2068.98		828	129.583	1064.58			762	1265.7	-13.4412		803	95.0526	2618.32			867	1593.25	77.25		988	2047.92	428.909			816	6172.19	424.156		898	3300.17	1467.25
	871	652.511	883.75		778	663	3283.94			930	2120.79	829.737		829	586.13	4098.75			763	-53.6216	-16.375		804	-104.245	4758.18			869	3845.22	182.592		989	4052.97	1669.96			817	2287.24	178.956		899	2888.62	900.375
	872	1316.08	1224.97		779	2426.62	15632.4			931	1105.34	337.362		830	1428.72	882.013			764	1008.05	-50.0781		805	-56.7632	1402.61			870	941.276	655.5		990	934.383	-3.11719			818	1121.05	49.1618		900	5606.85	6765.97
	873	602.775	13354.5		780	638.475	4170.61			932	7325.62	2821.23		831	150.316	2518.53			765	678.684	12.9265		806	469	37.75			871	2813.31	234.755		992	8497.54	3334.87			819	1939.71	121.526		901	956.75	4156.91
	874	1072.46	155.096		781	580.451	24929			933	2493	877.118		832	302.667	2844.67			766	172.525	0.275		807	-26.0526	1846.91			873	5007.05	346.35		993	541.697	5607.79			820	9149.25	396.75		902	739.889	199.556
	875	870.369	601.737		782	1504.86	24781.7			934	157	1205.43		833	448.888	459.316			767	405.007	28.9539		808	83.5789	1002.68			875	863.382	39		994	1174.85	582.208			821	1577.01	731.739		903	2977.28	859.196
	876	584.454	273.033		783	1478.75	8165.07			935	853	116.583		834	748.5	3222.55			768	1006.25	-33.4342		809	-82.5	1624			876	13608.1	749.692		996	7563.51	1195.05			822	4956.08	1209.56		904	467.288	197.725
	878	1791.97	417.5		784	366.299	14524.1			936	93.625	846.118		835	285.609	3693.78			769	723	-13.4211		810	2573.72	159.941			877	3048.7	19.2039		997	848.993	523.783			823	1278.61	5953.56		907	1217.13	240.474
	879	387.481	19962.9		785	3459.02	8582.62			938	2261.17	308.167		836	208.789	2578.84			770	384.25	25.025		812	-31.545	2072.05			878	2323	135.368		998	508.716	11133.1			824	937	7.1375		908	2439.89	1428.66
	881	1865.08	2151.5		786	546.808	15931.2			939	152.895	1983.11		837	1137.24	11771.8			771	1462.01	-28.6111		813	-137.559	2906			879	3175.3	184.578		999	581.398	149.391			825	290.906	137.422		909	340	4271
	882	761.08	588.44		787	959.975	7314.38			940	933.309	91.3421		838	443.721	170.096			772	26.375	0.25		814	185	3222.26			880	1544.46	56.6667		1000	2565.33	639.973			826	1526.46	321.625		910	743.651	359.007
	883	2352.26	5677.42		788	597.188	1937.94			941	374.842	511.237		839	180.961	1832.74			773	430.904	22.4375		815	-8	973.438			881	1364.46	296.697		1002	1328.83	145.917			827	878.969	47.0625		911	888.188	513.426
	884	756.211	306.645		789	515.99	635.032			942	2647.07	300.862		840	810.25	780.625			774	555.962	6.4125		817	6.74457	1111.42			882	16327.1	819.25		1004	2880.63	370.224			828	1602.32	141.493		912	1126.69	1075.84
	885	1781.2	4398.72		790	2451.81	11599.3			944	1068.76	545.895		841	719.62	1071.48			775	67.6024	101.364		818	2852.53	7.36932			883	1624.05	2134.46		1005	2034.89	15996.5			829	889.4	30.8		913	1209.11	319.658
	886	1810.7	765.244		791	1076.56	5930.87			946	2597.53	576.658		842	421.5	547.313			776	1582.48	63.2961		819	-14.6667	1100.15			885	16344	1131.51		1006	2196.42	1584.16			830	6198.29	309.154		914	3229.63	1397.58
	888	2551.06	2241.09		792	830.8	4738.54			947	3092.97	2211.04		843	1986.75	1444.62			777	626.784	-11.1776		820	83.5066	1334.84			887	4784.66	481.974		1007	1192.47	315.449			831	781.388	295.862		915	5336.67	1514.63
	889	921.072	526.395		793	728.67	18066.2			948	832.026	326.099		844	331.421	3200.43			778	739.969	-23.4		822	22.6818	9.38636			888	1736.28	88.4408		1009	372	6227.57			832	1395.19	125.382		916	530.974	437.342
	890	677	143.25		794	375.045	1921.11			951	2265.52	724.13		845	178.476	2232.19			779	1595.42	-11.2632		823	828.081	-15.75			889	8586.12	618.938		1010	675.5	1341.73			833	9545.1	1219.52		917	73.5	8156.24
	891	799.125	186.319		795	619.969	2220.3			952	757.816	143.895		846	1409.96	1034.67			780	2194	55.75		824	14.3333	2211.33			890	1232.06	167.353		1011	3141.98	759.326			834	1186.16	167.336		918	287.312	10779.7
	892	1509.33	321.9		796	1022.79	39562.7			953	935.816	159.329		847	347.053	4263.05			781	1294.05	-14.7763		826	1285.94	30.625			891	2495.64	477.477		1012	962.5	1757.5			835	350.96	6164.66		919	1461.99	1512.36
	893	1587.77	483.404		799	990.404	4486			955	626.789	140.105		848	468.474	4545.21			782	2.71591	-3.60227		827	3656.68	49.0526			892	4834.81	364.813		1015	3450.96	500.167			836	346.779	124.941		920	1319.98	280.842
	894	2051.07	283.543		800	853.156	21995.9			956	208.25	2047		850	738.789	556.632			784	906.607	21.3571		828	-59.9565	2901.24			893	5737.47	794.969		1017	21771.8	5114.7			837	2128.74	57.5263		921	394	-73.625
	896	1629.88	601.526		801	878.729	4448.83			957	-14.2614	90.9186		851	1191	1076.88			785	786.6	25.25		829	-35.6316	2611.72			894	1580.8	-5.56579		1018	1738.39	721.056			838	648.306	-49.7746		922	2172.99	470.02
	897	757.8	276.406		803	266.125	5968.49			958	1775.51	440.763		852	178.724	1641.04			786	666.344	-42.1562		831	-25.663	1139.9			896	1465.72	800.083		1019	3086.29	9266			840	2378.95	26.8947		923	2982.1	515.787
	898	3100.81	32796.4		805	613.5	2222			959	747.424	229.424		853	238.956	101.941			787	2697.69	5.75		832	-43.74	1388.55			897	23182.4	1435.81		1020	1911.14	454.671			841	18943.4	2360.3		924	986.737	878.737
	899	636	11184.6		806	3068.14	70424.7			960	1598.18	238.821		854	369.667	167.667			788	500.778	621.889		833	1231.77	-69.0197			898	2680.62	295.765		1021	3299	571.5			842	2752.1	88.3333		926	1032.14	351.074
	900	1970	502.15		807	1361.74	6527			961	385.806	182.708		855	731.086	1884.26			789	2259.5	27.8056		834	998.167	44.2292			899	1239.06	-108.188		1023	1077.09	1834.99			843	798.118	9.31618		927	2471.66	13559.9
	901	5226.81	5330.17		808	3650.99	89208.1			962	1080.44	201.292		856	856.844	1044.92			790	869	45.6842		835	-315.962	11275.9			900	2551.34	90.7105		1025	566.553	153.776			844	1383.03	181.479		928	3052.46	918.167
	902	1799.1	1101.5		809	376.606	8845.21			963	4981.24	2166.3		857	470.174	530.609			791	11.2727	3.81818		836	1008.33	0.333333			901	1979.37	145.097		1027	1193.86	175.821			845	8077.47	487.722		929	996.618	227.04
	903	465.2	216.431		810	2153.6	4504.92			964	945.789	480.145		858	192.296	2132.57			792	-3.48571	2.8375		837	-64.1875	2050.48			902	1830	235.167		1028	1172.24	241.651			847	2778.61	240.263		930	-12.45	8757.65
	904	1218.56	351.81		811	2711.92	12920.8			965	1066.17	254.671		859	342.619	2481.92			793	31.7031	11.0677		838	-76.9934	1407.24			903	1329.2	2.44853		1029	462.929	19584.3			848	3253.71	295.263		931	324.888	98.7039
	905	1227.91	45.9176		812	1328.73	3258.09			966	932.176	242.088		860	1453.91	1913.38			794	933	-32.125		839	-76.2303	2726.51			904	3206.07	272.27		1030	4846.54	718.033			849	6124.77	674.014		933	689.301	764.19
	906	1711.1	301.038		813	1891.96	25055.3			967	1189.85	279.368		861	157.413	799.891			795	924.882	-20.8421		840	-77.1667	3286.72			905	24996.4	1670.85		1031	5569.23	865.154			850	1448.93	30.8194		934	5418.84	3215.37
	907	187.389	7793.97		814	1084.91	22555.1			968	1170	256.682		862	314.68	2576.52			796	1539.14	55.5526		841	-17.9474	681.066			906	252.522	3.86842		1034	2702.28	259.697			851	820.555	1.67969		936	578.693	27574.7
	908	3294.11	2376.06		815	1084.37	4671.66			969	595.312	86.1806		863	541.745	4169.12			797	14.125	-4.375		842	-39.7566	898.618			907	1306.21	192.15		1036	1272.38	214.75			852	3480.45	194.075		937	825.062	245.854
	909	1446.08	246.391		816	4040.85	20374.9			970	2777.88	2569.4		864	700.5	518.978			798	20.0316	-3.10795		844	-5.97059	903.074			908	10187.4	729.745		1037	704.007	15.4211			853	704.329	39.6316		938	1674.54	30389.4
	910	694.208	938.778		817	-56.455	23287.1			971	1042.38	418.535		866	1456.84	1755.61			799	1655.11	-9.26786		845	1107.84	29.4211			909	29555.7	2056.1		1038	499.72	11131.2			854	3103.37	422.368		939	1739.07	1278.93
	911	706.875	254		819	1074.44	7269.07			972	3079.51	1948.76		867	593.78	6562.05			800	1055.65	5.65909		846	-76.3947	1413.63			910	7465.96	280.741		1039	3961.55	935.844			856	482.875	269.958		941	1087.62	307.375
	912	891.545	403.644		820	2221	10219.6			973	3300.05	636.979		868	159.688	1509.09			801	85.2812	18.75		847	-57.5326	1940.11			911	1328.14	-37.7143		1040	1419.25	1028			858	6271.49	13140		942	2134.95	589.8
	913	1568.74	637.478		821	2354.44	5055.15			975	1959.74	486		870	177.763	1640.87			802	951.978	16.8819		848	856.725	62.45			912	35728.8	2012.08		1041	3771.74	415.776			859	1905.36	-7.26316		943	549.292	117.653
	914	707.25	804.8		822	-102.406	23909.3			976	1449.82	281.682		871	3200.78	4175.73			803	-8.25	-13.3		849	972.092	572.092			913	5567.5	119.079		1042	735.852	10058.8			860	660.697	662.118		944	2251.52	1058.66
	915	4223.21	1424.44		823	81.7315	6424.4			977	2013.91	737.812		873	550.62	5965.94			805	1268.76	23.5511		850	1557.83	158.67			914	5544.04	476.079		1043	645.958	10529.1			862	6595.2	1085.52		945	506.553	717.684
	916	1071.31	142.381		824	691.688	3098.06			980	2309.34	797.658		874	1207.53	11291.9			806	776.623	12.5592		851	3825.86	90.7812			916	2656.94	153.618		1045	2340.63	249.211			863	3047.25	97.25		946	4244.2	2207.04
	917	5005.12	4032.57		825	1885.3	35439			981	-34.6364	19.6364		875	2807.26	2881.81			807	1038.5	-14.6711		852	23.9786	21197.9			917	1285.51	112.739		1046	612.109	142.484			864	2344.4	100.361		947	1004.27	401.271
	918	1237.09	204.969		826	571.169	1061.4			985	2128.28	357.196		876	2631.39	1224.22			808	717.779	3.63971		853	-31.3125	1468.75			918	1051.99	291.033		1049	1010.08	201.986			865	2235.07	98.5652		949	103.894	9518.32
	919	1255.92	677.55		827	2206.83	40684.3			986	2169	605.375		877	715.375	376.042			809	1010.52	47.2895		854	1463.12	90.375			919	5478.6	1091.21		1051	4518.85	669.958			866	21.5192	7634.17		950	419.485	259.022
	920	2325.9	218.913		828	1104.15	14795.4			987	683.553	1827.49		878	278.781	316.531			810	523.632	-1.16912		855	-46.285	4230.04			921	31530.2	1832.36		1052	1168.99	18144.4			867	1272.75	179.542		951	848.421	428.566
	921	1028.28	578		829	360.375	7676.78			988	60.3824	961.728		879	762.276	1208.25			811	928.224	-27.9474		856	873.422	42.7188			922	1554.15	104.141		1053	500.777	508.88			868	1723.41	15.1176		952	675.812	158.391
	922	1456.6	253.4		830	832.85	2509.32			990	401.789	166.75		880	203.833	324.75			812	1079.05	66.3947		858	619.625	83.5221			924	1824.51	84.6579		1056	488.847	1012.38			870	4950.08	689.958		953	688.776	291.353
	923	891.471	464.333		831	700.8	1403.84			991	1171	319		882	519.111	289.25			813	695.625	34.1875		859	1024.96	389.667			925	1063.66	110.625		1057	2194.42	302.5			871	622.586	30.5156		954	805.471	234.478
	924	1514.66	650.164		832	2074	9093.67			992	454.341	83.4318		883	325.171	1953.51			814	505.544	-8.14706		860	-62.875	2432.17			926	502.1	42		1058	119.995	11855.5			872	2438.34	220.816		955	1325.71	598.292
	925	862.938	186.688		833	800.759	37590			993	2120.63	906.526		884	1619.58	16301.3			815	901.422	10.7344		861	-86.4028	4096.62			927	1293.92	-12.2		1059	3242.16	369			873	1470.19	70.6268		956	2215.18	927.147
	927	2205.25	428.325		834	1506.89	8468.8			994	312.75	94.0294		885	359.849	1939.87			816	951.395	104.776		863	4927.21	766.125			930	1381.81	70.1875		1060	1035.22	108.694			874	646.917	52.4167		957	915.062	468.938
	928	2723.7	358.457		835	141.9	6683.55			995	318.559	51.8529		886	85.3043	1087.35			817	2147.39	2.15789		864	-45.4671	1867.66			931	1595.47	97.0938		1061	1099.94	26.4206			875	1351.59	257.875		958	600.5	893.627
	930	1671.65	517.971		836	443.487	1536.51			996	442.75	158		887	263.34	3222.9			818	586.153	-12.3403		865	1062.76	43.3235			932	1452.82	274.798		1062	7096.34	650.895			876	779.722	252.222		959	98.5865	6827.43
	931	1564.95	615.664		837	321.951	13742.8			998	445.579	324.526		888	226.789	2257.64			819	517.66	-38.1736		866	42.2083	8587.17			933	2681.55	189.835		1064	7251.05	5530.18			877	4672.64	305.691		962	810.734	21948.3
	932	3608.46	140419		838	2761.9	6368.53			999	2506.88	355.441		890	1904.6	855.65			820	2618.82	6.57292		867	587.603	294.765			934	999.083	50.1831		1065	4252.8	980.69			878	1924.98	13.4474		963	614.158	863.24
	933	4192.19	1358.69		839	1141.97	25043.4			1000	252.458	29.625		891	548.447	894.816			821	101.375	-4.96875		868	829.261	399.891			935	984.25	133.625		1066	3973.51	1895.21			879	230.484	11056.3		965	1018.25	279.167
	934	1171.01	99.7171		840	444.288	21968.7			1001	3844.85	3946.08		892	1270.13	13030			822	170.212	-5.60326		869	567.5	41.7794			936	1439.57	31.2216		1067	1990.59	360.5			880	1065.63	74.9408		966	311.563	3571.81
	936	2772.62	660.25		842	492.817	11853.9			1002	1345.74	354.304		894	450.031	320.563			823	1395.98	12.2143		870	3148.2	30.16			937	4000.78	176.987		1069	777.333	242.639			881	2895.64	132.146		967	80.2656	6598.52
	937	2388.43	6709.44		843	270.388	11446.1			1003	759.381	354.19		895	473.937	331.562			824	1258	10.3333		871	-253.87	17090.8			939	3581.98	115.489		1070	598.551	108.346			882	682.368	-60.8947		968	712.06	214.798
	938	2509.9	437.466		844	3232.64	10128.8			1004	1490.03	503.395		896	1791.73	19443.5			825	2255.13	73.9211		872	-65.25	3828.5			940	1254.92	158.562		1071	590.79	8515.69			883	7905.2	106.079		969	2543.15	5733.4
	939	749.961	256.625		845	1586.53	2611.56			1005	446.078	18.7344		897	1359.26	827.678			826	59.625	1.625		873	-45.6111	1301.22			941	936.89	112.708		1075	1150.32	1456.75			885	1137.54	96.5833		970	629.234	2463.31
	940	1702.73	679.523		846	913.864	38063.4			1006	867.026	469.816		898	612.932	246.716			827	447.354	1993.79		874	1066	7.44444			944	1746.53	168.632		1076	1419.28	271.895			886	936.294	69.0588		971	526.231	5995.24
	941	741.375	200.5		847	3666.34	81353.2			1008	1545.22	522.75		899	311.618	400.606			829	1128.59	81.1528		875	-5.08824	963.897			945	1828.31	269.443		1077	1498.25	131.432			887	3754.47	-75.4737		972	1012.65	2152.17
	942	2557.32	577.131		848	3312.22	12166.6			1009	1541.5	439		900	465.25	309.222			830	68.9444	1.01786		876	35.1042	1075.35			946	2666.56	275.6		1079	543.219	124.781			888	362.438	198.438		973	16822.9	5858.24
	943	482.5	58.2679		849	1813.95	22456			1011	4363.19	1782.25		901	543.175	1392.55			831	559.188	9.65625		877	-113	1682.5			947	2303.13	175.724		1080	12590.9	1992.76			889	733.083	80.625		974	2305.05	448.579
	944	1714.46	7452.48		850	1611.62	9964.27			1012	1065.39	358.136		902	779.153	456.986			832	834.944	0.333333		878	711.947	71			948	1428.86	48.3333		1082	1464.99	306.012			890	5046.34	359.132		976	59.74	4962.08
	945	406.5	5899.24		851	1440.39	6245.35			1014	69.4861	814.292		903	643.039	3895.64			833	396.091	-27.8375		879	2398.05	619.083			949	603.237	244.664		1083	1329.75	174.43			891	8918.16	566.037		977	544.854	365.674
	946	1591.42	25858.2		852	2980.54	105701			1015	736.375	12.5294		904	662.761	2168.85			834	713.079	20.3553		880	-45.8333	1443.76			950	2237.56	26244.7		1084	1043.25	6.20833			892	6076.42	789.92		979	6030.68	1584.3
	947	735.756	330.631		853	3797.65	39009.3			1016	883.062	85.9931		905	2911.51	3171.18			835	980.836	-13.6111		881	1854.51	141.721			951	1015.5	33		1085	949.316	214.342			893	1763.8	105.487		980	665.721	271.949
	948	2707.25	983.1		854	1896.35	8316.47			1017	165.895	1824.55		906	254.237	531.474			836	637.054	-5.75		882	15.9853	652.544			952	2017.06	45.0694		1088	14129.8	1126			894	2205.66	64.52		981	1251.41	504.375
	949	631.132	25.8		855	399.25	2308.79			1018	410.12	470.542		907	346.014	554.875			837	511.481	7.95625		883	1764.91	113.182			953	1287.24	156.132		1089	746.842	1066.11			895	31778.6	3297.67		982	1977.63	959.696
	950	846.094	294.375		856	3507.08	12724			1021	1017.78	347.243		908	3636.65	38551			838	304.3	5.3125		884	1058.94	105.792			954	1009.49	-32.1719		1090	1142.38	1009.74			896	3169.14	188.389		983	877.059	109.118
	953	1494.38	292.125		858	1333.27	4872.82			1022	287.375	2017.53		909	640.25	435.875			839	803.475	-18.1		885	1166.26	65.3452			955	1122.26	55.8947		1091	2376.09	460.182			897	1133.89	427.222		986	272.156	10121.2
	954	3140.64	651.846		859	1210.82	3398.34			1023	794	172		910	1059.58	1556.63			840	-66.0676	17.1		886	1636.59	265.33			956	4047.8	151.164		1092	7863.12	28.5263			898	1160	119.25		987	12460.5	4989.47
	955	1498.11	4003.7		860	620.471	6467.6			1025	1219.01	379.951		912	1897.78	8670.56			841	845.982	9.67857		887	-27.45	841.825			957	7501.47	789.337		1094	890.361	132.778			899	1684.95	15.2727		988	324.776	316.329
	956	3502.85	628.565		861	514.569	31216			1026	106.237	1521.59		913	367.299	561.158			843	71.7	1.61364		888	-48.9539	1372.16			958	2680.56	140.227		1095	951.48	60.0263			900	5942.64	232.425		989	7062.71	3105.16
	957	541.757	386.208		862	1563.88	10522			1027	738.035	276.958		914	742.086	840.178			844	57.044	1.65217		889	262	6754.96			959	2944.76	78.0921		1097	300.069	24065.8			901	3856.03	51.5469		990	355.25	788.511
	958	1954.25	1046.23		863	1317.67	5899.73			1028	303.908	511.592		915	485.52	6635.24			845	235.22	-13.25		890	-46.0789	1048.36			960	2368.16	25.1579		1098	619.978	291.838			902	3884.5	231.16		991	1169.36	900.101
	959	1760.46	606.674		864	1948.19	5424.37			1029	48.1111	309.162		916	175.632	2190.26			846	41.5515	0.558824		891	1306.7	67.881			961	1455.28	22.6029		1101	1053.84	136.276			903	3092.51	355.327		992	2225.08	1186.22
	961	1843.76	772.217		865	588.27	19308			1030	587.719	375.039		917	419.946	860.607			847	1466	16		892	-153.615	3740.35			962	3230.12	274.125		1102	1511.75	37809			906	440.362	254.48		994	1303.47	288.765
	962	1851.65	913.832		866	2665.36	13926.6			1033	901.828	1117.02		919	103.862	1422.76			848	635.706	18.2969		893	1601.39	171.895			963	1223.9	122.559		1103	681.15	102.55			907	2689.37	178.373		995	4170.96	4840.69
	963	3036.7	780.48		867	3977.25	19931.5			1034	3535.26	522.526		920	254.125	2734.42			849	859	4.4		894	-62.4375	1083.65			965	744.447	139.947		1104	2070.17	417.664			908	2047.25	228.105		997	2232.34	2655.5
	964	3456.96	1379.68		868	1334.4	18254.7			1036	2162.41	771.413		921	261.913	2931.83			850	646.75	39.3906		895	2391.68	163.013			966	1632.54	117.375		1105	894.25	3380.9			909	1200	81.875		998	936.5	478.812
	965	1931.67	704.418		869	1991.41	83791			1037	706.636	534.733		922	133.789	807.316			851	1450.28	-13.8056		896	-37.3158	3422.05			967	1900.99	240.472		1106	1880.74	241.349			910	3767.26	463.145		999	2041.03	3127.93
	967	337.075	260.062		870	317.313	17985.4			1038	931.652	497.522		923	585.85	3463.21			852	2174.67	-72.9062		897	-53.2105	2027.89			968	1128.81	89.375		1107	1672.2	350.039			911	729.771	95.7917		1000	1710.86	4616.72
	968	3412.88	1030.29		871	1999.17	7666.21			1039	779	172.889		924	274.088	278.853			853	1076.51	-41.2279		899	-102.395	2293.52			969	1703.58	122.276		1108	718.167	152.056			912	644.809	110.765		1001	4920.73	2810.09
	969	1878.4	831.832		872	1127.55	8877.3			1040	1143.55	376.145		925	405.684	554.474			854	11.2	-2.25		900	8.65625	3270.84			970	1209.78	53.5921		1109	2221.55	273.455			913	10923.1	22.52		1002	1017.95	450.318
	970	793.375	382.411		873	563.906	1356.58			1041	2439.67	1186.56		926	338.083	123.167			855	546.73	-57.6908		901	-33.9792	1903.81			971	2908.95	97.2237		1110	1089.76	173			914	6077.86	1804.41		1003	828.625	421.045
	971	655.375	8835.79		874	912.652	26457.4			1045	5461.27	2558.91		927	486.013	852.355			856	516.526	4.2		902	541.25	110.287			972	2393.33	245.171		1111	578.265	32.8529			915	1212.83	-118.042		1004	2194.32	4476.56
	972	1379.56	473.937		875	1000.83	18116			1048	2530.9	431.583		928	279.648	75.2557			857	602.215	-3.67361		903	697.5	3969.13			973	2116.5	118.125		1112	9480.8	1276.2			916	1345.09	1118.57		1005	720.539	240.56
	973	736.175	376.794		876	402.729	19496.8			1049	8329.54	2776.16		929	914.833	9373.44			858	727.042	6.97222		904	-9.1413	804.598			974	2367.17	167		1113	3536.04	538.961			917	873.344	109.921		1007	743.456	98.3529
	974	929.015	164.851		877	993.571	13983.6			1053	3091.98	1114.1		931	1396.67	2565.27			859	-31.475	-46.3		905	-21.6842	725.895			976	854.365	3168.34		1116	3178.98	560.816			918	997.214	33.4819		1008	1816.51	533.455
	975	991.607	2047.7		878	563.139	19908.5			1054	648.449	126.765		932	3254.16	3080.98			860	632.829	-6.57143		906	53.7222	861.722			977	7204.07	461.714		1117	618.5	915.056			919	127.925	-70.7		1009	1116.94	69.25
	976	491.85	-25.7		879	856.079	8271.5			1056	1094.12	106.583		933	162.908	2383.11			861	679.987	26.3487		907	3211.42	42.895			978	1027.64	189.472		1118	780.03	14969			921	8132.03	895.303		1010	2115.6	391.848
	977	383.125	17464.9		880	2549.53	10719.8			1057	2004.89	647.632		934	158.25	1763.82			862	762.66	-0.4375		908	-42.2566	985.329			979	1756.21	169.143		1120	7045.44	2180.89			922	1368.25	163.688		1012	547.799	180.153
	978	3148.38	1560.23		881	430.375	5165.54			1058	64.4583	1214.29		935	895.583	636.931			863	1899.33	-11.7961		909	-44.9167	708.292			980	1768.46	56.4444		1121	1769.92	237.267			925	2316.58	91.1548		1013	1570.57	1400.38
	979	2473.5	490.25		882	1187.08	50803.1			1059	174.914	1756.22		936	235.044	572.61			864	870.111	19.5556		910	1034.88	55.3971			981	1109.72	-19.5		1122	647.02	93.7763			926	884.112	57.9013		1014	1186.71	439.206
	980	582.432	301.875		883	958.096	5258.75			1060	57.2868	961.015		937	605.682	1467.86			865	637.276	3.39474		911	678.083	34.8542			982	1299.78	124.062		1124	4185.92	502.146			927	776.2	484.75		1018	6550.04	2012.81
	981	3195.66	799.621		884	1047.89	6437			1061	402.875	42.75		938	480.563	4147.12			866	12.75	4.125		912	368.566	1272.18			984	1225.12	64.625		1126	5525.34	3041.94			928	18041.9	976.817		1020	1570.32	799.816
	982	544	1929.8		885	1642.64	6570.58			1063	1115.22	210.934		939	1068.95	684.95			867	230	14.6765		913	388.066	270.921			985	3737.05	181.735		1127	2142.23	2980.8			929	6604.62	410.625		1021	477.15	26585.5
	983	743.25	177.775		886	840.36	3133.56			1064	2190.38	3112.36		940	146.727	1353.09			868	38.3224	1.95395		914	-13.8333	1142.11			986	1031.66	41.625		1128	1272.5	186			930	6647.05	488.526		1022	6046.31	7561.87
	984	2169.94	974.688		887	1717.64	14895.9			1065	3963.01	1082.58		941	287.16	2854.74			869	45.325	18.425		915	-6	710.75			987	1815.76	151.342		1130	886.646	521.014			931	1150.62	127.972		1023	1092.64	564.644
	986	4327.37	1507.43		888	2424.99	3079.79			1067	2204.42	482.316		942	230.408	1943.2			870	1232.86	4.81944		916	625.986	49.8472			988	970.941	134.529		1131	1294.36	97.3333			932	3071.21	209.326		1025	2418.01	1859.37
	987	1941	1101		889	3510.94	16249.5			1068	659.139	150.84		943	496.303	171.368			872	120.562	-20.875		917	740.176	54.5294			989	683.299	70.2083		1134	7704.04	989.625			934	515.303	61.3289		1026	543.711	634.197
	988	1106.3	526.849		890	-4.78125	12098.2			1069	404.75	86.9934		944	585.625	565.875			873	502.401	14.0395		919	-11.7788	2460.81			990	1126.33	108.312		1135	1271.59	201.643			935	2293.83	362.908		1027	2616.8	2572.85
	989	1577.42	560.375		891	439.812	3334.02			1070	1081.17	653.375		945	1576.12	1166.58			874	107.8	-21.2		920	-105.76	3368.8			991	1763.25	213.438		1136	2228.34	480.938			936	4920.02	322.566		1029	815.826	384.632
	991	230.306	5508.27		892	3078.39	147341			1071	144.368	1484.61		947	4164.88	4510.44			875	39.4659	23.0057		923	97.4896	2443.39			992	2071.17	32		1137	2568.64	-8.49342			937	6597.78	275.487		1031	1561.22	1395.64
	992	1351.94	294.438		893	3100.95	6504.23			1072	2884.68	905.952		948	1296.31	2033.6			876	52.0333	15.4062		924	2.09868	1470.05			994	1084.17	127.4		1138	1977.75	828.797			938	1136.73	107.599		1032	1106.14	2600
	993	1842.49	560.56		894	672.5	2443.98			1073	1311.65	792.78		949	1250.08	12984.4			877	736.795	34.375		925	-296.477	17460.3			995	1893.5	25.3056		1139	3182.66	7473.83			939	3954.39	6227.41		1033	7767.61	4859.23
	994	936.844	152.719		895	711.531	3185.1			1074	1969.91	162.772		950	443.676	808.443			878	-1.125	14.525		928	-169.158	3903.43			997	6116.56	387.231		1140	6854.06	10127.6			940	78.8125	4.7		1034	9455.52	3613.26
	995	444.194	377.417		896	1621.52	8683.77			1075	992.528	204.111		951	823.829	477.474			879	1281.28	45.125		929	539.5	54			998	1512.24	118.553		1142	2224.19	193.212			941	1601.85	127.081		1037	803.309	324.487
	997	181.869	6558.97		897	1779.19	6578.52			1076	75.4211	1251.32		952	710.086	791.934			880	1578.2	30.9211		930	-31.6579	879.704			999	522.875	96.1562		1143	820.075	1742.09			942	994.525	240.237		1039	1640.59	4958.26
	998	1091.22	139.33		898	950.104	2460.26			1077	272.771	2049.7		953	300.016	2451.6			881	1553.09	8.47368		931	1328.77	127.934			1000	14214.8	711.005		1144	13884.9	7379.88			943	2340.79	709.179		1040	925.382	382.221
	999	3925.22	582.544		899	597.745	4546.99			1079	1284.08	577.645		954	69.5526	1253.98			882	1006.88	0.5		932	-55.3421	2477.52			1001	921.391	47.3438		1145	2243.02	300.054			944	1186.5	179.5		1042	1000.2	112.82
	1000	3644.08	932.44		900	265.036	18866.1			1080	624.007	146.465		956	101.167	1167.21			883	538.625	15.3625		933	1506.2	125.816			1003	2370.59	178.789		1147	1029.55	238.179			945	737.046	173.547		1045	793.667	447
	1001	1287	74969.4		902	46.8929	16434.5			1081	2263.52	1033.61		958	2750.62	6256.66			884	131.321	4.58929		934	-67.5	1824			1004	2506.65	3594.99		1148	9196.98	2534.1			946	957.875	188.688		1046	545.611	148.722
	1002	2799.41	329.955		903	940.625	2581.61			1083	1337.14	474.161		959	507.236	386.562			885	970.479	-14.9583		935	-83.8478	4007.32			1005	889.615	21.8		1150	1299.56	435.184			947	6441.83	248.548		1047	1504.97	2671.39
	1003	784.526	255		904	903.937	21589.4			1084	4975.53	3425.1		960	2317.98	1418.62			886	1301.37	-16.6908		936	907.647	86.4118			1006	5697.85	228.272		1153	1570.59	3731.85			948	1428.37	110.487		1048	1128.04	49618.6
	1004	1623.18	223.467		905	1457.84	11052.8			1085	8489.8	2789.77		961	913.021	1470.17			887	83.45	-3.35		937	-30.0625	808.25			1007	8927.75	476		1154	891.833	99.9167			949	2079.58	-46.0521		1049	288.968	23267.6
	1005	770.042	251.625		906	116.69	14468.9			1088	96.1739	1268.89		962	191.053	1853.68			888	2587.82	82.7273		938	-0.166667	696.354			1008	4003.54	409.167		1155	2108.61	371.026			950	1889.8	89.9583		1050	491.851	138.367
	1006	3687.25	843.333		907	590.439	48211.2			1089	629.583	136.694		963	289.914	3361.22			889	513.812	12.7656		939	140.092	1314.29			1009	1013.8	-58.4		1156	3135.67	365.913			951	1959.7	712.696		1051	1486.59	1885.84
	1007	2627.8	6908.3		908	3266.36	80702.5			1090	978.109	354.098		964	255.016	2515.42			890	678.25	-6		940	-3.47283	1511.09			1010	6095.47	321.895		1157	6399.8	1062.75			952	873.974	380.211		1052	2141.91	771.149
	1009	645.197	147.605		909	1475.15	6056.53			1091	820.823	953.906		965	530.1	4636.36			891	-9.34286	-13.0833		941	-144.077	6995.31			1011	1192	44.8947		1158	6769.26	874.888			953	2290.91	62.6471		1053	1435.05	1579.42
	1010	63.5562	5591.4		912	1489.94	8449.47			1092	1560.18	197.974		966	294.895	3203.58			892	750.9	33.9		943	-92.375	2891.75			1012	2197.61	131.428		1159	13637.3	1701.26			955	423.636	1730.85		1054	2270.39	2343.21
	1011	928.228	35060.7		913	2789.28	13914.8			1093	1659.77	1406.93		967	157.016	1701.42			893	240.975	8.15		944	-22.3043	720.261			1013	732	17.3333		1160	971.417	70.9236			956	1460.29	188		1057	4360.21	3981.82
	1012	374.491	10208.2		914	332.688	7996.78			1094	315.857	94.0476		968	181	1672.18			894	184	-5.25		945	635.395	95.8816			1014	2635.78	163.559		1161	1992.61	-102.269			957	40.6032	-4.875		1058	1871.38	669.793
	1013	4441.51	1433.56		915	454.638	10117.1			1095	826	273.125		969	146.447	2237.87			895	69.0556	6.40341		947	-54.3026	2452.76			1015	764	-24		1163	1721.75	166.5			958	3120.56	193.556		1059	978.579	706.329
	1014	1087.94	43.6875		916	1417.07	7555.33			1096	688.278	291.667		970	582.37	7840.43			896	751.5	57.8542		948	-48.2632	1063.47			1017	1871.12	173.588		1164	4762.01	953.467			959	1069.84	-144.484		1061	2011.48	432.765
	1015	2061	652		917	2386.92	10812.7			1097	243.855	1945.5		972	604.895	606.684			897	997.574	42.9779		949	4.27174	928.902			1018	950.27	-56.8026		1167	1113.57	98.3571			960	2513.74	132.507		1062	764.886	972.034
	1016	651.183	220.267		918	1003.01	1663.59			1099	5661.81	2055.98		973	678.789	2240.7			898	687.986	27.5556		950	1579.39	146.887			1019	2615.62	198.338		1168	570.901	2286.97			961	3800.95	1019.43		1063	1364.91	591.954
	1017	1524.01	846.474		919	549.341	19115.1			1100	2685.87	4160.34		974	519.296	5549.16			899	144.625	-10.25		951	-28.5263	1450.22			1021	902.669	95.8162		1169	3485.33	387			962	199.87	6955.22		1064	639.02	688.75
	1018	1135.36	416.421		921	3552.45	38366.1			1101	922.347	419.188		975	376	293.813			900	617.203	48.4444		952	1671.6	156.735			1022	1607.83	645.87		1170	3209.67	-11.1196			963	3257.83	277.342		1067	2821.34	2035.61
	1021	902.914	30094.2		922	5089.8	18623.2			1103	2330.33	295.348		976	583.493	392.309			901	2672.62	21.1118		953	-45.3224	1328.37			1023	40151	2206.9		1171	2182.16	293.789			964	3508.98	445.773		1068	1899.86	691.316
	1023	1104.46	2187.29		923	691.157	3583.66			1104	2401.2	464.761		977	289.83	3145.36			902	290.8	41.55		955	1206.28	76.5066			1024	2715.72	114.625		1172	831.667	16501.8			965	1077.64	34.3016		1069	579.021	-4.38732
	1024	3457.42	1465.93		924	797.38	2634.15			1105	101.319	1259.97		978	1775.89	2164.84			903	2419.45	0.75		956	-7.36842	793.388			1025	2859.95	457.447		1173	1316.46	152.042			966	2867.15	202.25		1071	803.588	183.412
	1026	3016.72	997.375		925	1946.11	6841.63			1106	296.062	2116.35		979	568.281	5833.09			904	251.6	51.7		958	723.625	35.75			1026	867.132	121.801		1174	13380.3	2434.5			967	1849.69	56.9934		1072	7019.4	6451.69
	1027	1384.17	383.112		926	327.851	15414.2			1107	922.138	253.901		980	245.417	2734.06			905	171.1	1.7		959	-9.56481	4526.58			1027	1121.72	90.6172		1175	22590.9	3419.25			968	1199.5	128.5		1073	1740.74	1268.57
	1028	1272.06	249.396		927	706.43	3332.74			1108	8219.79	3655.02		981	2737.6	5815.19			906	757	-3.22222		960	-98.125	1212.37			1028	1024.07	123.309		1177	1306.57	420.464			969	1397.85	217.882		1074	171.512	16515.1
	1029	2780.1	2182.3		928	2371.9	6187.96												907	-50.9342	16.5		961	4268.52	35.7019			1029	1012.31	56.2039		1180	1651.2	201.257			970	4658.75	64.875		1075	506.737	2220.22
	1030	4096	7896.7		929	358.938	8548.81												908	494.148	5.75		962	2262.8	45.2			1030	1320.35	143.625		1181	936.826	65.5556			971	956.298	24.2692		1076	1175.25	3876.91
	1031	920.427	803.062		930	1525.17	20717.4												909	930.836	-7.25		964	49.9946	1378.4			1031	1333.4	134.895		1183	1835.32	383.724			972	164.942	10516.2		1077	498.25	2601.68
	1032	1119.02	619.092		931	2713.75	67584.9												910	11.7317	-3.63636		965	-43.2955	1153.49			1032	1083.7	270.95		1185	2218	-51.1579			973	681.934	81.3603		1078	489.658	-267.05
	1033	1389.86	331.693		932	1282.43	48264												911	17.5074	-7.33824		966	3535.47	372.757			1033	5227.21	8840.7		1186	973.75	202.75			974	808.476	50.7143		1080	1648.9	1530.23
	1034	1822.25	611.271		933	198.379	15727.1												912	673.59	6.21528		967	-16.6176	756.971			1035	1934.09	191.648		1189	661.18	162.547			975	956.235	-38.6471		1081	1663.73	848.362
	1035	3453.75	1052.55		934	1573.85	4841.29												913	991.38	28.825		968	1355.79	97.5867			1036	2555.58	78.5833		1191	643.141	41.9219			976	3124.97	436.864		1082	840.5	206.423
	1036	1177.79	564.627		935	599.38	7330.71												914	85.4194	-7.5625		969	-11.224	1871.8			1037	873.25	33.4375		1192	12533.4	2629.22			978	1212.66	124.289		1083	678.971	187.294
	1037	1922.88	903.882		936	174.607	23782.4												915	871.053	-18.4803		970	1340.47	108.77			1038	940.2	103.1		1193	1718.83	7616.42			979	2138.95	156.635		1084	478.603	2479.98
	1038	1882.04	559.93		937	1996	34944.6												916	843.081	-34.7721		971	808.833	117.417			1039	1033.25	29.35		1194	509.086	1097.64			980	1372.19	141.544		1085	1378.22	454.717
	1039	2641.55	527.938		938	2286.21	14822.7												917	14.75	-13		972	-342.861	21064.6			1040	1561.28	62.8684		1196	11957.2	2450.06			981	1982.5	831.625		1086	3122.39	868.739
	1040	536.744	86.2557		939	1203.65	16177.7												918	1162.05	27.5197		973	-91.1667	24798.5			1041	8968.61	665.583		1197	2389.01	151.5			982	1010.32	112.44		1087	863.929	372.929
	1041	330.861	-41.7917		940	1461.2	6122.98												919	1048.43	-13.5294		974	-33.5789	1710.02			1044	1058.33	19.3333		1198	492	25.9583			983	83.1667	12288.3		1088	1218.92	1559.88
	1042	364	12164.9		941	2992.75	10304.9												920	1353.18	6.64474		975	2109.38	146.688			1045	8376.88	365.188		1199	201.211	5059.95			984	365.472	8937.83		1089	10957.6	11688.6
	1043	2249.64	1922.02		942	524.26	5789.02												921	3.27679	0.392857		976	955.151	125.691			1046	1007.71	102.471		1200	1134.12	228.211			985	90.025	15.725		1090	345.375	2430.38
	1046	830.083	240.188		943	302.048	26276.1												922	966	144.5		977	116.969	3575.12			1047	941	35.8158		1201	609.188	236.18			986	334.781	37.7656		1092	243.347	8317.87
	1047	418.844	364.938		944	714.25	5309.25												923	3696.74	2.19565		978	-60.4211	853.421			1048	8775.4	570.32		1202	1179.89	4408.45			987	504.106	5184.3		1093	6675.44	2950.12
	1048	555.857	-379.476		945	4258.02	12818.9												924	506.526	32.8618		979	488.895	259.211			1049	996.708	-29.9792		1204	1575.08	225.553			988	689	71		1095	815.708	40.7569
	1049	770.131	158.534		946	1331.5	4205.6												925	-2.5125	4.6875		980	-7.85294	837.515			1051	6906.09	305.316		1205	561.6	7349.85			989	2814	133.528		1097	210.757	3137.56
	1051	642.588	18222.9		947	-142.445	19174.8												926	716	-52.6667		981	836.309	0.779412			1052	3284.09	295.145		1206	2753.12	438.098			990	3415.52	291.542		1098	194.361	12113.5
	1052	4531.28	21569.6		948	784.5	17361												927	74.95	-15.875		983	1111.64	25.0278			1053	690.694	7867.74		1207	18902.6	5031.94			991	3855.61	307.344		1099	760.111	303.25
	1054	694.777	495.043		950	385.444	16968.3												928	1102.9	16.7847		984	1388	22.0833			1054	906.794	79.5588		1209	1511.85	1764.6			992	511.352	27.9375		1100	821.292	56.5833
	1055	640.196	16802.4		952	1272.73	5654.94												929	642.111	11.4444		985	-5.98026	1962.77			1055	11559.8	755.737		1210	5988.88	849.05			993	2343.67	317.19		1102	705.831	294.239
	1056	126.25	5342.62		953	1873.79	7976.13												930	18.4103	3.3625		986	-37.0658	647.625			1056	1051.68	109.632		1212	1268.21	313.408			994	1500.72	95.0815		1103	815.471	571.316
	1057	502.019	3614.59		954	777.875	2999.26												931	622.841	5.89844		987	-157.115	6261.02			1058	959.375	115.146		1213	5428.06	686.672			995	4053.23	98.6957		1104	5360.06	2033.28
	1059	744.972	270.417		956	877.995	2323.31												932	486.544	-34.2206		988	895.14	51.2868			1059	1469.12	116.934		1214	755.941	15.7059			996	789.597	78.125		1107	1813.5	697.5
	1060	1655.88	432.208		957	1136.08	5869.56												933	938.746	22.7917		989	133.5	9684.5			1060	1026.85	39.125		1216	1337.09	-29.5882			997	1921.84	33.6579		1108	498.963	316.559
	1061	1188.05	43967.2		958	1562.51	5496.78												934	857.711	33.5263		990	1442.78	115.891			1061	2560.56	100.438		1217	1362	236.389			998	2465.96	1484.74		1109	524.46	2866.54
	1062	196.202	5146		959	1028.48	8074.55												935	18.2987	-4.6		991	-45.5526	2555.97			1062	598.711	19.8092		1219	5438.74	2.53125			999	3422.31	122.98		1110	205.759	14834.1
	1065	992.394	408.444		960	1834.13	65955.2												936	286.378	-0.4		992	-75.0385	2387.21			1063	959.73	89.5263		1220	888.868	421.493			1000	1741.26	-15.4539		1111	835.875	29534.4
	1067	3632.32	1004.45		961	2386.67	10485.7												937	184.438	-3.1875		993	1146.43	231.079			1064	1389.82	99.1838		1221	6676.73	1170.06			1001	1869.61	118.142		1112	535.75	3043.88
	1068	1175.81	42129.2		962	4034.64	19229.2												938	898.993	8.72059		994	94.0217	5824.27			1065	8809.1	722.8		1222	3598.35	1775.22			1002	19927.3	1975.37		1113	424.132	256.921
	1069	1023.85	243.375		963	386.85	6802.28												939	1025.49	35.4091		995	-163.911	4630.91			1066	2002.38	139.664		1225	2691.88	440.484			1003	5989.86	163.763		1114	730.737	235.253
	1070	1780.87	42.4539		964	786.615	4564.62												940	12.9375	-2.7625		996	-18.0588	748.044			1068	3014.71	22.5573		1226	2002.68	225.842			1004	1006.23	71.1406		1115	677.167	9094.43
	1071	2295.8	1374.56		965	3154.85	4939.96												941	1512.8	0.897727		997	-108.739	2204.01			1069	1612.38	486.932		1228	1820.27	839.951			1006	10105.1	829.156		1117	475.965	2299.16
	1072	740.995	747.5		967	1016.38	1810.12												942	120	61		998	-32.8696	1216.2			1070	711.4	324.75		1229	885.611	199			1007	4816.7	463.724		1118	527.934	949.079
	1074	1690.81	1325.44		968	1374.65	9770.48												944	1122.75	138.868		999	-39.1739	1943.91			1071	841.438	44.375		1231	554.125	13108.2			1008	693.688	-10.6597		1119	3296.63	2518.71
	1075	2604.27	555.917		969	378.111	13484.9												945	577.14	-11.0956		1000	-11.3043	1399.87			1072	2881.42	162.549		1232	1521.43	50.75			1009	1100.51	8975.53		1120	602.424	330.714
	1076	2986.94	1058.21		970	4777.81	14960.1												946	30.3143	0.0592105		1001	454.5	25.9118			1073	1384.89	2365.39		1233	798.062	41.2812			1010	661.396	4015.46		1121	3796.55	1225.74
	1077	351.212	2637.54		971	1100.4	4299.62												948	792.094	28.3437		1002	1418.64	404.199			1074	1125.28	119.914		1234	3155.4	530.457			1012	3260.95	371.347		1122	694.443	567.898
	1078	3051.78	890.625		972	3831.64	81137.6												949	1313.15	24.6471		1003	-73.8261	1345.7			1075	6088.75	460.75		1235	2331.57	271.174			1013	14375	2248.97		1123	383.875	6825.48
	1079	841.284	457.182		973	2402	5288.74												950	119.525	-16.5875		1004	1393.06	133.083			1076	1270.78	-2.95833		1236	1402.7	45.8828			1015	2362.75	261.674		1124	1829.43	3537.31
	1081	1950.14	246.566		974	1405.53	6825.61												951	36.8846	-0.461538		1005	-99.1974	2005.32			1077	1853.93	110.524		1238	2601.25	289.625			1016	2980.17	214.609		1125	901.796	9209.05
	1082	929.125	152.562		975	714.875	2045.69												952	426.833	-3.875		1006	-25.4044	870.684			1078	5239.76	365.092		1241	4819.66	2560.25			1017	894.605	-56.9474		1126	1015.86	298.02
	1083	1014.83	342.75		976	1303.68	2611.9												953	569.508	-3.18382		1007	-67	1017			1079	1211.64	126.461		1242	303.79	3968.51			1018	2434.13	51.2717		1128	1160.7	1314.39
	1084	1463.12	554.25		977	3311.47	15141.9												954	713.551	40.5294		1008	-5.5	2689.25			1080	7843	425.5		1244	1899.47	442.574			1019	2324.64	251.286		1129	402.007	325.092
	1085	1761.53	251.612		978	4043.84	24849.4												955	904.647	15.3529		1009	1212.26	82.3684			1083	924.174	53.0139		1245	501.875	43.375			1020	2114.27	227.406		1131	3560.08	1011.87
	1086	770.875	374.5		979	583.607	8228.8												956	99.6	15.35		1010	-53.2778	6355.61			1084	2781.49	95.6522		1246	886.598	608.848			1021	1044.21	113.82		1132	397.462	12905.1
	1087	4187.85	2219.26		980	742.2	2473.2												957	735.671	-29.2763		1011	-42.875	1472			1085	945.833	-27.9861		1247	1277.5	187.5			1022	3090.99	77.6447		1133	404	187.597
	1088	1299.74	1335		982	1632.66	6882.21												958	474.197	12.0263		1012	-31.5263	1434.57			1086	1565.15	165.958		1248	784.716	651.585			1024	902.587	-21.2		1135	488.289	203.711
	1089	902.612	188.2		983	1742.43	12725.4												959	1002.18	-9.4		1013	-25.7105	756.658			1087	5167.36	409.76		1249	4306.69	665.5			1026	2331.03	61.4737		1136	402.438	344.594
	1090	396.429	208.143		984	2390.93	9655.27												960	696.661	38.0469		1014	1298.8	106.696			1088	2067.03	66.4868		1250	841.414	108.109			1027	5513.2	661.849		1137	956.724	773.789
	1091	614.625	323.146		985	951.196	3768.94												961	874.613	-13.1		1015	3649.52	113.034			1089	1139	150.25		1252	264.111	15151.1			1028	3676	404.875		1138	4306.11	1127.64
	1092	2026.84	1796.37		986	497.013	1343.24												962	769.947	20.4211		1016	2416.16	138.184			1090	2201.84	222.719		1254	1545.61	1658.44			1030	6052.71	387.5		1140	951.222	11307.7
	1094	573.5	247.5		987	1018.67	3854.28												963	39.9091	-9.71429		1017	-27.5526	3093.49			1091	7359.63	306.65		1255	962.912	78.0441			1032	1552.12	0.661972		1141	1265.73	52539
	1095	3807.03	1053.36		988	920.607	30246												964	411.654	-2.63462		1018	-65.7647	1025.71			1092	1778.51	1726.63		1256	903.701	1010.66			1035	13378.2	2379.22		1142	3318.42	2127.89
	1096	2060.3	580.697		989	1162.75	20872.3												965	685.599	3.05263		1019	392.765	78.5			1093	1277.34	21.8947		1257	3577.07	636.158			1036	3535.55	810.35		1143	1377.18	549.597
	1097	1446.56	1386.25		990	613.875	5485.5												966	1224.68	36.9342		1020	1254.85	64.5263			1094	1942.71	211.554		1258	2190.52	331.545			1039	787.75	156.75		1145	709.648	443.136
	1098	549.75	434		992	1934.49	12839												967	126.096	7.51316		1021	-55.3421	1074.24			1095	10229	590.5		1259	1770.39	87.6579			1041	2875.68	-100.261		1146	783.974	1532.14
	1099	3041.38	1469.62		993	983.5	4512.79												971	517.922	16.925		1022	-75.8947	1351.49			1096	2291.58	272.536		1260	2438.41	376.518			1042	1961.78	241.681		1147	1767.75	1507
	1101	1613.36	964.263		994	2519.91	43005.4												972	-76.3333	-1.75		1023	-8.84211	1286.16			1097	6235.79	213.632		1261	6966.52	577.565			1043	2134.07	162.474		1148	1124.38	237
	1102	1003.36	239.909		995	2102.2	21775.6												973	92.325	-7.73438		1024	5.78261	1070.48			1098	957.86	22.7353		1262	1037.4	115.169			1044	2114.95	128.693		1149	382.25	6802.5
	1103	2324.64	120.031		996	1412.03	4168.45												974	891.737	3.78947		1025	-18.1818	1104.82			1099	1266.74	58.25		1263	1715.43	251.182			1045	814.919	62.9		1150	693.571	218.583
	1105	4656.29	7044.39		997	691	4059.49												975	446.342	0.631579		1026	994.118	104.647			1100	818.922	171.75		1264	949.471	515.412			1046	165.562	8468.69		1151	3467	1505
	1106	1052.44	446.375		998	5040.19	17342												976	65.8	26.837		1027	-23.5294	783.221			1101	1050.08	153.35		1265	1862.5	598.237			1047	1708.38	110.417		1152	1680.27	2062.96
	1107	1481.48	174.479		999	521	2250.93												977	25.2045	11.1591		1028	18.7039	1057.63			1102	1221.53	-12.4687		1266	6168.03	18215.8			1048	21734.1	1034.35		1153	1343.66	1591.63
	1110	1834.98	342.966		1000	2135.3	39035.5												978	213.298	38.7969		1029	1052.71	-10.2895			1103	1090.75	55.25		1267	4410.26	932.391			1049	802.263	664.263		1154	1212.91	1027.48
	1111	1240.66	443.974		1001	1382.47	21820.7												979	0	0		1030	-10.3261	1105.37			1105	2564.46	136.875		1268	1255.81	4306.96			1050	2275.95	1479.9		1155	538.431	416.042
	1112	3507.31	544.385		1003	1007.68	6151.54												980	1998.55	50.6974		1031	804	179.5			1106	1740.96	65.2574		1271	446.294	21367.8			1051	11416.9	870.524		1156	6615.03	3323.01
	1113	780.455	397.091		1004	2314	17100.5												981	1407.1	23.0119		1032	735.75	256.75			1107	1340.38	147.097		1272	2193.25	506.5			1052	4585.07	200.533		1157	927.401	11328.1
	1115	766.114	354.33		1005	195.844	17609.2												982	647.158	6.73684		1033	1690.79	59.3947			1108	1057.21	110.368		1273	1052.83	209.296			1053	3506.35	288.777		1159	340.025	8655.66
	1116	1616.58	556.402		1006	671.393	2596.34												983	781.836	36.7656		1034	1909.19	249.187			1109	26533.6	1400.54		1274	1085.23	1759.92			1054	25222.1	3560.87		1160	246.575	94.375
	1118	1446.36	399.025		1007	3478.5	11079.8												984	773.38	75.3958		1035	1096.42	44.1912			1111	2979.2	258.704		1275	1472.44	28.3456			1055	2872.84	238.12		1161	1772.28	2535.8
	1119	2400.85	41953.7		1008	459.75	1701.25												985	745.562	36.2812		1036	-23.1316	792.947			1112	2558.93	181.967		1276	1573.05	-77.0625			1056	2671.96	362.833		1162	1516.5	503.028
	1120	2093.79	1044.47		1009	766.732	8599.92												987	7.6375	0.2125		1037	25.1184	1006.55			1113	602.75	81.8214		1277	1414.95	106.645			1057	10481	624.259		1164	1487.98	254.809
	1121	908.833	319.667		1010	891.688	5960.79												988	532.837	29.8062		1038	1565.59	70.5395			1114	1984.3	194.074		1278	1467.05	173.632			1058	575.059	178.412		1165	468.722	189.861
	1122	3214.27	775.784		1011	3050.91	28884.3												989	679.934	-16.25		1040	8.47222	1080.96			1115	404.013	4429.3		1279	1490.66	247.158			1059	1935.41	225.659		1166	352.548	7564.42
	1123	4297.69	1646.8		1012	367.441	13336.4												990	1854.84	60.2935		1041	-22.0417	1387.98			1116	1873.53	146.647		1280	8020.9	1551.26			1060	1764.89	63.3162		1167	445.111	845.014
	1124	1502.28	624.975		1013	1237.38	5767.29												991	1561.48	9.79412		1042	715.441	43.6765			1117	1230.57	40.2857		1283	827.083	462.821			1061	3378.25	88		1169	2404.68	1921.12
	1125	3873.06	863.213		1014	3053.48	9516.86												992	642.455	-11.2321		1043	-21.875	1433.44			1118	8715.29	592.375		1286	2742.12	315.972			1062	1014.91	-292.891		1171	576.908	672.6
	1126	1237.19	191.45		1015	2256.57	9242.11												993	589.302	17.125		1044	-25.7604	3648.95			1119	852.5	-20.5		1288	1970.02	333.054			1063	4032.17	578.62		1172	960.444	382
	1127	1597.29	3702.26		1016	1639.92	6271.87												994	4.23684	0.725		1045	-41.462	2258.65			1120	34776.8	1628.37		1289	583.875	352.191			1064	1159.51	-33.4514		1174	272.394	14514.7
	1128	1539.66	487.421		1017	1040.47	3864.55												995	118.6	23		1047	2312.61	40.5789			1121	778.953	50.6719		1290	1713.53	164.763			1065	2177.63	156.592		1177	564.812	562.708
	1129	576.368	140.842		1018	1726.8	13920.3												996	1625.93	-33.4079		1048	-20.095	2088.66			1122	11975.9	634.62		1291	856.417	62.6389			1066	702.263	-38.5789		1178	595	193.221
	1130	925.74	1499.16		1019	1018.37	7253.06												997	32.7778	6.55357		1049	1445.27	101			1123	3201.17	226.016		1293	5746.97	10119.6			1067	2324	133		1179	2303.81	902.993
	1132	1630.82	826.344		1020	2527.83	106880												998	944.954	15.7961		1050	-54.2368	1462.17			1125	4806.97	250.529		1295	4768.95	1562.4			1068	1064.74	9703.51		1180	1294.92	524.36
	1133	539.924	110.391		1021	471.231	16246.2												1000	-13.25	6.75		1051	26.9013	1452.99			1127	1809.86	152.375		1296	2772.58	253.104			1069	2866.08	160.118		1181	1418.63	580.395
	1135	554.286	514.143		1022	1585.6	6684.59												1001	32.4348	-10.0444		1052	2.42763	598.303			1128	2086.07	239.474		1297	4697.72	690.96			1070	960.5	48.125		1182	3572.28	680.429
	1136	933.368	371.789		1023	864.88	2714.42												1002	12.511	-2.8587		1053	53.8487	1572.14			1130	746.965	288.882		1298	998.063	94.125			1072	743.237	34.5724		1183	1514.81	6748.74
	1137	731.526	450.671		1024	412.188	15268.2												1003	1618.94	43.5		1054	-83.6842	2526.54			1131	2052.66	106.553		1299	1009.79	60.8824			1073	521	388.75		1184	2675.84	1444.16
	1138	994.153	456.958		1025	842.312	2464.49												1004	1177.13	-53.5368		1057	-36.3421	2234.95			1132	3201.74	247.921		1300	1006.29	128.882			1074	2836.93	291.131		1185	2142.61	2545.13
	1139	2703.75	603.75		1026	2374	22858.5												1005	1102.4	-88.9048		1058	-52.1842	1521.32			1133	7946.16	436.421		1301	756.778	244.944			1075	836.824	93.1471		1186	1306.51	738.648
	1140	598.171	323.211		1027	633.938	1776.74												1006	1140.61	2.75625		1059	-40.5556	968.667			1134	1023.62	33.5882		1302	1180.32	361.826			1076	2186.45	214.895		1187	5304.92	1643.74
	1141	1376.61	535.303		1028	1663.79	10091.7												1007	0	0		1060	16.3947	1268.89			1135	6326.65	401.079		1304	1002.11	274.306			1077	3096.88	130.493		1188	2492.38	973.875
	1142	4140.75	1878.37		1029	3247.86	24080.7												1008	737.389	-8.41406		1061	1223.63	91.7279			1136	8919.15	491.327		1306	970.324	508.471			1078	546.972	-26.8056		1189	748.094	58.5156
	1143	2899.78	1461.03		1030	1626.35	6430.75												1009	873.861	-5.47222		1062	21.2171	916.118			1137	596.669	117.449		1307	6236.56	916.538			1079	2497.6	349.026		1190	1831.95	342.579
	1144	1089.37	296.684		1031	2059.12	9772.29												1010	4.75	1.41667		1063	-78.4567	3561.52			1138	2955	908.5		1309	546.454	4690.97			1080	1456.99	125.074		1191	5582.67	2467.67
	1145	973.919	390.494		1032	903.221	30692.4												1011	417.75	51.125		1064	2005.27	7.76087			1139	1251.03	-5.29412		1310	3967.02	916.375			1081	175.75	3769.5		1192	2140.6	936.321
	1146	782.274	397.988		1033	466.457	24451.1												1012	33.8824	-11.0882		1065	-35.6316	2182.85			1140	1935.27	193.441		1311	1916.12	85.5147			1082	1525.97	566.582		1193	2302.56	520.625
	1147	2529.01	948.545		1034	495.125	24418.4												1013	77.2222	-8.19565		1066	5.83553	1647			1141	1027.26	68.9853		1315	940.449	-5.02941			1083	4282.19	425.891		1194	631.625	225.5
	1148	324.714	6840.42		1035	1767.09	7746.7												1014	1775	172.571		1067	-63.4028	1571.68			1142	958.163	-42.5938		1317	7369.83	1896.94			1084	602.556	93.9722		1195	2251.04	790.562
	1150	3035.5	1572.02		1036	3733.64	12601.4												1015	1859	149.559		1068	-35.3684	1474.97			1143	1564.81	181.842		1318	1024.89	149.819			1085	4873.84	5088.84		1197	884.309	1727.35
	1151	1481.65	285.176		1037	1262.12	4173.79												1016	43.4013	22.1908		1069	-72.9231	3288.15			1144	5174.64	315.553		1319	2093.94	504.836			1086	1865.53	66.4063		1198	3998.84	3265.24
	1152	785.46	975.364		1038	776.309	31957.6												1017	40.0862	5.01136		1070	1560.89	53			1145	596.056	45.6111		1320	243.172	19769			1087	904.938	98		1200	575.099	394.487
	1153	1905.51	277.225		1039	1404.69	650.731												1018	-22.4062	28.15		1071	551.406	41.375			1146	3263.45	142.079		1321	1028.17	-76.0833			1088	644.265	87.5368		1201	907.132	232.853
	1155	2963.92	658.804		1040	517.481	10689.2												1019	426.208	7.14375		1073	-44.0347	1931.88			1147	839.837	202.025		1322	13282.9	1564.53			1089	17753.9	1038.01		1202	3212.02	2257.96
	1156	1104.05	245.551		1041	1215.1	4772.82												1020	774.07	8		1075	-13.2609	817.326			1148	1823.72	124.639		1323	1242.2	10091.6			1090	982.028	41.3056		1203	3328.76	1672.58
	1157	614.481	68.7063		1042	1359.13	7865.85												1021	59.65	11.35		1076	-82.0417	1874.71			1149	2338.75	176.143		1324	552	119.625			1091	3016.97	60.3553		1204	565.972	228.25
	1158	1930.87	835.087		1043	980.881	4094.82												1022	1967.67	53.3333		1077	-88.8947	3188.35			1150	1178.83	133.776		1326	1563.49	338.347			1092	707.485	68.4044		1205	135.492	14617.8
	1159	2883.15	734.625		1044	2800	14548.3												1023	1098.26	2.82031		1078	-13.5	1433.92			1151	6259.85	1674.92		1327	1423.5	210.75			1093	14217.5	1346.92		1206	3997.03	1882.99
	1163	460.583	266.25		1045	1018.75	4233.35												1024	968.556	-4.63158		1079	3.75	706.257			1153	7149.78	267.836		1328	481.844	16689.8			1094	12882.4	736.46		1208	554.007	192.754
	1164	2616.07	668.325		1046	1597.42	13938.8												1025	581.319	-7.66667		1080	-62.3906	3378.27			1155	3472.28	121.984		1329	2703.96	560.707			1095	1015.81	2746.88		1210	889.5	469.25
	1165	2112.44	879.302		1047	489.75	10336.3												1026	1011.18	-14.2353		1081	-51.3804	1207.26			1156	726.316	33.6316		1330	2365.62	100.5			1097	286.333	437		1211	1137.59	61839.8
	1166	884.26	4589.7		1048	908.312	42241.9												1027	1362.75	-21.3125		1082	-5.59375	1404.46			1158	1419.9	3		1332	7707.44	1996.46			1098	12359.2	897.444		1212	649.688	407.354
	1168	579	6980.33		1049	107.47	7128.55												1028	675.231	-12.2125		1083	-71.9671	1906.43			1159	2554.7	2988.17		1333	1294	247.5			1099	3010.74	73.4079		1213	492.285	676.972
	1169	1390.03	685.092		1051	610	3611.8												1029	1215.38	20.4934		1084	825.674	470.979			1160	677.485	45.9338		1335	804.348	703.87			1100	7599.45	568.987		1214	252.13	5914.79
	1170	1206.42	712.333		1052	2381	4150.89												1030	22.85	-9.9		1086	659.953	39.8906			1161	788.48	151.178		1336	1372.74	185.868			1101	1090.41	-1.11765		1215	857.659	532.562
	1171	3231.09	663.151		1053	1999.2	44649.5												1031	830.455	96.1176		1087	-286.404	18297.9			1162	926.125	28		1337	719.708	14.5694			1102	2248.66	440.888		1217	2197.33	791.167
	1172	1316	713.575		1054	2098.14	10718.3												1032	1076.97	55.5		1088	-28.0461	1951.94			1163	2053.02	183.493		1338	1430	232			1103	928.417	9.02778		1218	1338.05	2805.26
	1174	742.083	44.0556		1055	3790.38	35187.9												1033	1142.32	-0.732143		1089	-5.27941	1325.12			1164	2142.18	158.487		1339	2429.21	298.757			1104	19529.8	2370.54		1219	226.115	6302.33
	1175	663.25	224.699		1058	550.46	1982.62												1034	29.3553	-0.546053		1091	-182.231	4327.35			1165	12827.2	640.879		1341	395.803	4816.24			1107	2688.69	361.591		1220	430.926	295.522
	1176	870.691	166.059		1059	767.156	2540.08												1035	746.176	21.1176		1092	-4.65909	883.898			1166	1344.64	72.5312		1343	1822.35	374.511			1108	23926.1	1360.23		1221	3982.88	1847.76
	1179	747.507	19.8382		1061	606.824	33017.8												1036	47.6534	1.80114		1093	1209	130			1167	1029.08	54.9474		1345	1162.49	134.204			1109	713.156	27500.6		1222	307.75	19930.3
	1180	1752.01	435.551		1062	559.5	27761.5												1037	1214.84	21.5263		1094	-32.1625	9.275			1168	1809.26	27.5125		1346	773.456	140.681			1110	891.147	16.5441		1223	716	214.25
	1181	985.75	499.237		1063	1454.23	7871.84												1039	-6.30769	-35.6		1095	-31.8533	806.402			1169	5364.47	277.885		1347	981.875	92.5833			1112	3021.26	68.9737		1224	865.316	471.079
	1182	2058.61	1498.48		1064	1263.51	4978.9												1040	357.175	4.075		1096	2219.49	37.7632			1171	2212.45	311.711		1348	857.526	3976.32			1113	9202.94	960.597		1225	1053.75	347.338
	1183	1891.56	79469		1065	2659.56	7615.43												1041	812	-1.14286		1097	-134.52	4098.88			1172	4425.87	1624.74		1350	7371.52	1675.05			1114	1631.5	71.7895		1226	2304.16	2844.44
	1184	2378.4	964.2		1066	1037.03	6097.71												1042	680.612	25.5066		1098	27.3261	1290.57			1173	2659.83	113.099		1351	18776.8	3268.8			1116	1538.93	254.699		1227	308.837	12502
	1185	3428.26	1124.84		1067	342.656	8176.41												1043	1509.35	110.369		1099	-74.2019	2361.41			1174	963.029	48.1471		1352	8944.84	1905.98			1117	316.508	14534.8		1228	345.167	375.833
	1186	916.875	277		1068	578.9	3004.05												1044	803	4.58333		1100	-6.53125	691.438			1175	1773.14	92.2303		1354	16325.7	2325.25			1118	1061.42	89.1786		1229	1015.17	687.444
	1187	1065.03	219.625		1069	2905.05	71634.4												1045	1364.84	-27.8158		1101	-2.4837	1151.77			1176	1292.66	215.842		1355	488	586.667			1119	3528.84	299.487		1230	2815.5	388
	1189	631.656	1507.33		1070	1246.78	6028.43												1046	180.304	62.4565		1103	7.98684	1165.55			1177	724.444	33.7778		1356	736.097	100.125			1120	4642.92	292.815		1231	1424.56	236.222
	1191	2322.3	1949.44		1071	1929.26	8395.3												1047	637.382	32.7647		1105	64.37	1795.14			1178	13764.9	1113.85		1357	667.704	1633.38			1121	3838.18	161.632		1232	6754.12	2185.92
	1192	3495.38	4072.65		1072	2221.94	106030												1048	1727.14	-28.7039		1106	477.859	12.8906			1179	1390.92	149.268		1358	656.875	245.25			1122	1464.5	-26.5634		1233	437.7	10097
	1193	1791.17	42373.9		1073	1880.97	5284.89												1049	1543.59	53.9766		1107	3.99342	812.039			1180	274.934	4384.26		1359	2054.61	348.523			1123	2473.95	223.071		1234	741.118	548.194
	1194	216.454	6695.45		1074	1560.2	66633.2												1050	5731.32	77.2105		1108	-65.1579	1626.1			1181	1212	103.967		1362	1068.25	2251.81			1124	2101.11	209.197		1235	1361.25	364.855
	1195	395.75	13558		1075	926.919	2092.13												1051	472.221	37.7059		1109	-36.7763	1486.8			1182	1191.75	160.5		1363	1397.09	292.25			1125	2164.64	80.5054		1236	1388.03	947.344
	1196	60.0921	7093.36		1076	684.725	2047.67												1052	1859.71	40.3158		1110	-42.7039	1339.46			1183	861.132	149.158		1365	1456.51	77.1645			1126	2180	36.0526		1237	6959.23	2637.15
	1197	1659.04	798.211		1077	1423.64	4188.04												1053	30.775	-5.225		1111	36.5588	-2.29412			1185	4236.8	275.789		1366	6591.56	50.8333			1127	3230.47	173.632		1238	567.745	10883.4
	1198	2294.23	684.886		1078	552.25	2865.37												1054	632.381	27.5938		1112	-62.0469	3348.08			1186	2998.37	2726.32		1367	6312.28	873.239			1128	3593.59	215.007		1239	678.597	508.889
	1199	1539.42	-7.45109		1079	1302.67	3504												1055	81.0235	9.26136		1113	-21.7778	760.222			1187	658.539	4.77632		1368	21	15509.9			1129	1859.11	143.046		1240	610.299	1077.93
	1200	2002.24	376.174		1080	1365.05	5105.09												1056	7.5	-3.96591		1114	98.47	1947.65			1188	1502.21	196.842		1369	1857.3	566.6			1130	1516.39	123.696		1241	1140.78	16583.7
	1201	1345.51	211.535		1081	2776.58	143935												1057	44.4938	-53.0114		1115	814.094	87.8625			1189	1398.79	117.947		1370	2831.55	430.24			1131	4017.61	300		1242	751.618	251.441
	1202	2127.83	498.594		1082	1026.92	7012.96												1059	2100.77	34.1786		1116	-85.3421	1689.77			1190	21060.8	920.385		1372	1570	9677.2			1132	1937.39	231.875		1243	77.3929	7095.9
	1203	1625.3	469.682		1083	811.02	3539.97												1060	469.025	5.3		1117	-21.1118	2186.24			1191	1048.38	25.0278		1373	1491.69	2204.25			1133	3118.89	265.302		1244	546.736	90.0875
	1204	1502.23	682.273		1084	1043.71	5210.49												1061	1929.14	69.5395		1118	-90.9671	2313.9			1192	1324.14	61.4079		1374	4949.64	1082.33			1134	1888.84	214.23		1245	912.809	209.772
	1205	2114.16	1534.41		1085	577.125	1029.73												1062	607.75	-11.2014		1119	309.349	1188.11			1193	2561.92	168.158		1375	16706.5	2367.94			1135	1822.5	35.3684		1246	347.562	275.646
	1206	2993	418		1087	636.407	1910.57												1063	1061.2	-12.9342		1120	1705.74	331.737			1194	683.188	-30.3403		1376	937.364	516.676			1137	3685.03	1591.31		1248	1607	436.5
	1207	613.12	363.446		1088	1852.26	9216.19												1064	560.5	-16.125		1121	1071.22	133.833			1195	1086.88	76.9167		1377	2306.09	431.375			1138	3377.41	159.22		1249	2659.32	1565.89
	1208	2330.43	517.162		1089	1624.25	6506.94												1065	944.75	-6.11111		1122	-39.4792	2813.62			1196	1517.31	112.354		1379	468.57	73.7266			1140	1529.48	-76.2381		1250	974.362	367.987
	1209	2019.09	394.386		1091	2744.96	8447.38												1066	14.775	-32.5375		1124	1351.48	90.6645			1197	1159.76	117.66		1381	716.676	150.882			1141	614.974	43.3421		1251	713.307	222.104
	1211	1766.43	459.505		1092	2855.43	41633.8												1067	952.246	79.5833		1125	65.3704	9379.15			1198	1451.79	36.2721		1386	471.587	6597.5			1142	877.908	264.105		1252	1953.02	45711.8
	1212	3196.94	2644.55		1094	1230.14	4070												1068	1102.76	42.5526		1127	-8.36842	787.789			1199	1449.34	15.8421		1387	5442.94	184.958			1143	785.477	30.375		1254	8445.54	3199.62
	1213	2200.22	902.375		1095	323.431	2063.47												1069	280.753	39.8036		1128	940.453	33.3438			1201	2405.8	137.408		1389	5488.21	922.158			1144	1578.52	75.7763		1255	1893.47	4694.63
	1214	2303.04	249.706		1096	1543.54	23190.5												1070	-49.15	-0.1375		1130	412.237	156.921			1202	6170.03	433.224		1390	3498.72	39.0132			1146	4671.75	96.99		1256	2489.85	661.005
	1215	1126.34	818.989		1097	3291.93	11819.3												1071	2098.61	-1.93478		1131	-5.71711	788.803			1203	1340.64	89.125		1391	1304.33	105			1147	1602.25	-65		1257	1401.92	1261.29
	1216	1633.53	248.745		1098	3326.67	39142.9												1072	426	-73		1132	-92.1985	959.875			1204	4493.78	156.717		1392	343.454	1865.28			1148	4672.64	-39.8636		1258	1677.2	244.382
	1217	591.531	57.5		1100	211.036	18742.9												1073	5473.49	64.08		1133	-67.9239	1771.51			1205	1459.08	185.611		1393	872.706	99.4706			1149	897.171	99.4276		1259	746.625	1244.27
	1218	3200.1	72222.5		1101	296.167	916.111												1074	427.6	-7.6		1136	-5.74342	2132.9			1206	2254.27	318.011		1394	990.324	41.1765			1151	1718.71	123.286		1260	627.519	7216.23
	1219	1055.75	149.8		1102	868.926	3855.06												1075	686.032	27.8594		1137	535.941	8.70588			1207	7466.86	655.45		1395	7347.37	1728			1152	970.986	25.9653		1261	141.462	8521.13
	1220	3317.16	2571.14		1103	751.281	2483.47												1076	718.125	68.125		1138	37.3684	1200.84			1208	5563.82	121.368		1397	1224.93	81.4079			1153	13824.7	615.185		1262	324.412	933.706
	1221	3746	8121.75		1104	472.375	2187.79												1077	86.1125	13.9875		1139	-7.92105	989.026			1210	2904.92	1844.5		1398	909.281	41606.7			1154	1029.07	135.961		1263	462.211	245.684
	1223	665.7	148.85		1107	560.565	18322.6												1078	-1.6625	-7.7625		1140	-0.513158	964.697			1212	5061.05	238.961		1399	457.474	1684.11			1156	1715.55	303.789		1265	7071.35	1769.46
	1224	524.971	35561.3		1108	158.713	6669.17												1079	828.5	107.441		1141	29.9375	26.4375			1213	1484.71	82.9803		1400	1108.11	20.8947			1157	1733.72	129.224		1266	828.089	211.571
	1226	726.579	683.947		1109	239.031	22789.1												1080	2214.8	98.7386		1142	-164.991	4527.05			1214	2981.38	130.526		1401	2375.5	116.5			1158	945.167	26.6667		1267	675.303	544.08
	1227	1481.15	853.438		1110	384.522	6366.45												1081	532.312	-7.32353		1143	-4.19565	929.609			1215	718.75	80.75		1403	1301.99	2383.73			1160	5488.05	3119.93		1269	1552.91	-71.1607
	1228	685.879	16074		1111	235.77	2066.23												1082	54.925	18.25		1144	1111.64	71.3			1216	730.375	33.5526		1404	2518.15	21.017			1161	1720.14	77.9868		1270	2988.93	1996.13
	1229	2325.18	473.55		1112	936.281	3809.91												1083	575.361	-1.61806		1145	-5.44565	1141.35			1217	1250.74	227.595		1405	1330.36	269.048			1162	28161.2	1419.79		1271	7933.76	3402.06
	1230	1199.53	138.187		1113	2090.86	45715.6												1084	-10.2	14.3		1146	-29.5781	1649.2			1219	1009.5	5		1407	3661.62	533.432			1163	852.118	459.336		1272	887.333	41.6667
	1232	547.6	285.4		1114	1011.19	3770.59												1085	28.3125	-9.8125		1148	87.1667	15914.2			1220	1585.67	111.172		1408	4394.5	684.5			1164	1517.12	114.583		1273	390.833	57.6042
	1233	1768.55	1395.59		1115	1294.8	6127.94												1086	1129.06	57.7059		1149	840.361	41.1736			1221	9063.79	575.01		1411	2500.37	1328.63			1165	1228.08	184.8		1274	521.078	-7.32812
	1234	1164.13	180.105		1116	3101.99	11053.2												1087	673.349	21.2105		1150	-251.1	7412.23			1222	656.235	358.706		1412	1485.61	206.679			1166	1170.4	148.382		1275	920.313	2464.91
	1235	1885.53	2306.83		1117	1935.49	11859.5												1089	6.58974	1.15		1151	-42.3553	4354.08			1223	1163.59	37.5735		1413	317	8468.38			1167	2175.62	49.3125		1276	1247.25	808
	1237	1953.06	1054.28		1118	1028.95	3293.65												1090	547.727	12.75		1152	-266.04	6098.32			1224	547.343	405.053		1414	1893.81	203.333			1168	1275.24	8.96711		1277	391.308	7472.02
	1238	4147.32	1094.3		1119	1401.62	4632.9												1091	1009.32	20.3333		1153	-96.4783	1813.67			1225	4669.07	214.184		1415	2364.1	230.849			1169	1101.33	55.6389		1278	280.434	744.158
	1240	559.121	14050.9		1120	612.71	33158.4												1092	-7.05	20.625		1154	1566.01	-12.9028			1226	847.529	121		1417	1205.57	2438.76			1170	1297.21	104.25		1279	2684.92	782.658
	1241	1456.99	74439.2		1121	439.286	16349												1094	31.225	-11.6375		1155	995.803	267.961			1227	1106.96	37.6103		1419	1433.86	158.283			1171	2104.91	84.9318		1280	2806.37	3382.23
	1242	1627.64	582.368		1123	3443.36	40994.9												1095	578.006	25.2438		1156	1075.84	162.421			1228	2098.47	70.3224		1420	647.011	2415.72			1172	7642.83	8470.99		1282	1164.53	333.028
	1244	2317.55	668.675		1124	1821.02	7285.82												1096	562.094	27.9412		1158	-54.3882	2179.41			1229	1638.62	58.625		1421	259.958	10939.4			1173	710	-9.15789		1284	1018.43	241.882
	1245	4264.82	46271.1		1125	2730.38	16048.4												1097	1077.08	85.3194		1159	-100.217	1980.54			1230	995.743	23.5588		1423	2018.75	11069.2			1174	5167.25	78.76		1285	751.737	277.632
	1246	701.278	297.25		1126	1314.35	4138.43												1098	865.191	-2.09211		1160	7298.95	340.207			1231	1194	60.3309		1424	2560.85	33193.8			1175	668.339	851.036		1286	2736.5	1216.32
	1247	882.75	121.125		1127	1490.7	5861.69												1099	271.55	30.1		1161	700.074	5.26471			1232	3879.93	179.284		1426	1072.71	155.816			1176	3090.45	377.428		1287	515.321	420.131
	1248	2902.29	768.674		1128	670.538	8683.58												1101	-87.9821	7075.01		1162	976.322	-29.2105			1233	1129.66	123.125		1428	610.854	72.6944			1177	992.48	19.25		1288	1616.67	1242.67
	1249	817.303	181.618		1129	667.031	1479.86												1102	2134.4	44.7935		1163	2053.55	103.472			1234	2679.66	151.934		1429	957.221	33.2868			1178	1118.14	35.9145		1290	269	13558.4
	1250	3445.39	631.898		1130	627.776	2814.73												1103	-2.725	-3		1164	-12.8889	730.667			1235	37711.5	2586.06		1430	4416.37	556.217			1179	3098.32	114.605		1291	296.947	14441.3
	1252	3466	940.56		1131	2068.05	7603.82												1104	441.012	-45.7125		1165	12.0395	1495.57			1236	774.824	-8.10294		1431	5936.11	644.326			1180	1879.69	101.031		1292	1707.98	683.154
	1253	3470.95	1595.45		1132	1872.77	8801.93												1105	562.327	2.79375		1166	-72.2391	1457.88			1237	3014.67	186.396		1432	1331.62	601.189			1181	1366.5	37.8684		1295	5841.73	10373.5
	1254	707.523	328.54		1133	1377.96	4949.85												1106	2112.8	48.2381		1167	-17.5	1140.77			1238	3371.7	1.16912		1436	494.947	96.0526			1182	7324.46	341.048		1296	15833.4	5489
	1255	1108.44	133.887		1134	169.357	89471.7												1107	12.7712	-0.075		1169	-29.3816	669.5			1239	613.422	124.969		1437	1760.08	654.639			1183	241.202	18295.7		1297	668.3	288.3
	1256	1485.03	521.861		1135	213.481	17850.2												1108	799.562	-14.5208		1170	-212.02	5316.78			1240	4157.75	181.833		1438	12681.1	1638.51			1184	810.5	46.25		1298	529.793	2172.35
	1257	845.412	256.325		1136	408.2	4660.4												1109	607.234	-28.4062		1172	1054.19	90.7153			1243	4740.51	355.882		1439	5027.93	2606.13			1185	5865	324.315		1299	2478.06	1752.94
	1258	2220.4	15264.2		1137	927.63	5603.19												1111	916.328	-25.9191		1174	1976.53	114.243			1244	1363.82	136.985		1440	967.822	375.579			1186	0	0		1300	941.395	408.987
	1259	997.553	15863		1138	962.537	3821.44												1112	461.27	4.00658		1175	45.2039	2949.35			1246	2297.18	132.647		1441	7484.6	2665.45			1187	920.917	73.0208		1301	938.789	252.579
	1260	966.125	263.5		1140	2914.74	11148.8												1113	1693.48	-16.2917		1176	884.974	8.57895			1247	1607.68	180.696		1442	10159.5	2001.69			1188	1859.69	100.479		1302	678.4	158.4
	1261	946.158	153.171		1141	956.88	5038.67												1114	85.8182	-4.38235		1178	-28.7105	978.434			1249	1015.42	8.97368		1444	570.875	159.083			1189	1366.33	17.6838		1303	412.25	1782.75
	1262	1877.93	775.674		1142	591.788	1727.54												1115	891.708	32.4028		1179	-159.632	3545.16			1250	1507.28	100.447		1445	728.95	11969.8			1190	678.438	96.875		1305	1432.21	504.63
	1263	499.706	-9.94118		1143	122.817	5701.6												1116	1004.5	67.5714		1180	-15.2969	2138.88			1251	17920.7	2483.68		1446	685.833	22236.3			1191	846.139	188.472		1307	2636.75	177.882
	1264	1976.8	750.6		1145	581.938	23355.1												1117	1329.74	7.05263		1181	-69.7292	801.75			1252	649.688	152.569		1447	1339.37	175.421			1192	374.125	6461.52		1308	453.233	24226.9
	1265	2153.17	517.024		1146	2088.07	3582.35												1118	860.224	11.2368		1182	1066.75	76.0592			1253	730.434	148.605		1448	3049.47	103.912			1193	800.5	47.3472		1309	1454.13	519.743
	1266	776.76	2597.44		1147	859.319	3564.3												1119	28.5385	-7.79808		1183	1.14474	854.796			1254	4350.64	523.174		1449	1687.65	65456.4			1194	13835.5	655.44		1311	526.688	1159.5
	1267	622.365	1455.25		1148	414.81	11768.7												1120	730.5	11.75		1184	-46.9474	858.158			1255	952.956	103.412		1450	832.451	1071.34			1195	1554.58	83.7895		1313	4106.33	1951.85
	1268	1406.45	661.047		1149	1171.15	4892.06												1121	1083.6	-14.85		1185	173.105	583.158			1257	768.6	75.125		1451	1240.9	83.25			1196	1573.37	124.652		1314	154.239	6078.15
	1269	3582.5	363.75		1150	2787.69	7582.89												1122	5640.1	-7.35		1186	-32.9211	3661.45			1258	1421.33	47.5		1452	-4.94737	9719.95			1197	2411	66.6667		1316	1058.83	794.556
	1270	1063.37	264.158		1151	584.056	3122												1123	-8.525	-7.475		1187	-33.9722	1229.75			1260	3403.44	161.625		1453	1028.31	110.089			1198	1823.79	220.474		1317	1398.14	571.976
	1271	769.574	371.316		1152	599.635	2921.97												1124	732.891	-12.4844		1188	-158.475	2921.43			1261	1368.41	71.1562		1454	288.158	11021			1199	1988.82	151.553		1318	2997.94	667.969
	1272	3853.77	561.231		1153	726.375	3625.77												1125	755.325	27.7		1190	21	1515.16			1262	763	13.75		1455	11260.1	1391.81			1200	4250.21	305.536		1320	608.812	126.531
	1275	2141.8	571.038		1154	556.944	11989.4												1126	909.221	10.1838		1191	-48.5	2495.5			1263	1231.4	113.6		1457	2284.07	7.82292			1201	1125.38	65.2206		1321	1233.01	354.053
	1276	1186.25	106.353		1155	2663.32	123105												1128	492.647	31		1192	769.355	273.263			1264	2923.29	104.184		1458	2021.89	230.036			1202	1675.18	91.2262		1322	3676.71	2027.47
	1277	3486.37	1096.78		1156	1050.15	10392												1129	686.75	291		1193	-109.432	4508.31			1265	2672.33	75.9205		1460	861.562	136.875			1203	7562.24	2341.96		1324	3189.93	2269.61
	1278	4060.2	3033.55		1157	1485.89	2741.46												1130	837.812	181.094		1194	1660.75	119.315			1266	587.125	50		1461	1547.96	70.7917			1204	1973.73	46.4868		1325	5314.89	2172.62
	1279	773.944	236.639		1158	817.55	3453.17												1131	1687.41	31.1932		1195	1454.42	0.210526			1267	2246.67	60.0694		1462	622.724	129.618			1205	668.784	2891.09		1326	772.5	660
	1281	855.125	428		1159	971.362	6287.23												1132	772.653	19.4167		1196	960	182.833			1268	1208.34	79.9265		1463	8795.49	1115.24			1206	1708.5	173		1327	2919.17	322.987
	1282	1460.56	633.55		1160	1246.89	4828.8												1133	274.4	-7.675		1198	-7.59211	2480.41			1269	3007.19	73.619		1464	1961.66	490.816			1207	1300.11	318.211		1328	635.812	924.25
	1283	2962.57	990.894		1161	340.525	3864.88												1134	1258.21	134.75		1199	1330.2	98.7159			1270	2272.52	342.207		1465	1810.6	249			1208	761.294	74.5294		1329	672.037	167.75
	1284	782.506	308.767		1162	345.6	9211.08												1136	858	75.25		1200	-73.4013	1746.43			1271	1092.25	57.25		1467	6796.7	-1.23026			1209	574.167	84.1667		1330	442.693	12662
	1285	2971.42	805.25		1163	619	21922.8												1137	782.163	27.9318		1201	-1.78947	1001.42			1272	1030.42	51.5789		1468	994.25	183.342			1210	1275.95	94.5263		1331	483.465	163.41
	1286	2322.49	75204.7		1164	1175.47	5833.02												1138	27.5	17.3375		1203	-100.908	1739.62			1273	1032.76	481.556		1469	1932.61	31981.7			1211	3928.39	276.19		1332	449.417	465.282
	1287	4196.94	3114.75		1165	970.786	34701.6												1139	872.934	34.7063		1204	-5.125	624.188			1274	1341.8	171.333		1470	792.007	163.803			1212	787.319	101.306		1333	1010.02	773.364
	1288	2495.99	1002.97		1166	546.75	2629.78												1140	970.75	10.5		1205	64.5	751.833			1275	1541.45	38.1118		1471	986.815	3299.68			1213	306.333	327.778		1334	104.75	6586.96
	1289	372.95	374.25		1167	730.75	3867.78												1142	837.056	33.0312		1206	-42.6118	1397.92			1276	897.562	35.0625		1472	848.5	171.25			1214	1829.51	72.9375		1335	2077.04	619.56
	1290	2648.68	2144.52		1168	1917.69	10795.4												1143	579.836	-39.2031		1207	-105.49	3873.14			1278	1530.31	-4.86184		1473	2009.91	34782.9			1215	756.431	205.917		1337	818.763	119.895
	1291	230.115	6380.04		1169	735.162	2242.72												1144	135.451	-25.3409		1208	997.833	40.3333			1279	2656.6	138.2		1474	1375.4	849.359			1216	3855.77	158.577		1338	985.441	315.211
	1292	2546.03	19576.7		1170	1945.71	5426.99												1145	564.781	-4.92188		1209	-153.941	4259.53			1280	1200.73	110.104		1475	955.278	427.04			1217	2608	267.609		1340	1112.24	-80.7083
	1293	1600.38	199.167		1171	3930.36	42048.8												1147	1274.75	46.3929		1210	351.092	196.099			1281	1262.54	49.5809		1479	2812.83	461.167			1218	6756.97	833.202		1342	745.688	201.562
	1294	378.982	4164.33		1172	1956.23	2748.11												1148	18.8864	-40.3182		1211	-32.7	1668.18			1282	2097.06	-34.625		1481	2503.61	731.947			1219	4205.79	235.87		1343	1537.37	454.5
	1295	4735	4952.5		1174	562	1880												1149	800.25	36.7438		1212	23.6125	53.1625			1283	1450.95	103.963		1482	585.56	639.457			1220	3803.39	262.612		1344	6561.91	2119.28
	1296	1793.12	557.8		1175	4799.12	26887.5												1150	635.109	-40.7344		1214	-36.6902	1051.72			1284	1501.83	142.857		1483	1700.74	49979.1			1223	904.408	84.6579		1346	695.935	1102.3
	1297	655.8	208.775		1176	4791.9	13875.2												1151	17.9766	-10.4609		1216	33.6667	1345.33			1285	2994.6	136.951		1484	1780.74	79.7083			1224	854	24.875		1347	359.2	28.6962
	1298	649.75	33.2836		1177	242.268	13378.4												1153	1112.7	104.868		1217	-6.90217	746.609			1286	740.425	0.325		1485	1595.33	15070.8			1225	15084.4	884.861		1349	392	74.8333
	1299	3455.91	938.168		1178	3012.39	85151.7												1154	1033.2	46.4844		1218	-87.28	3969.72			1287	1014.18	4.10294		1487	1302.62	23.3095			1226	2475.08	331.329		1350	677.1	124.45
	1300	2040.22	633.406		1179	599.911	37458.5												1155	210.725	20.15		1219	-17.625	651.875			1288	1250.22	88.5556		1489	710	91.25			1227	183.088	1217.74		1351	200.63	10222.9
	1301	393.763	328.868		1180	907.79	19111.6												1156	692.233	16.1		1220	-16.6645	1198.78			1289	1173.55	202.214		1490	3300.62	413.462			1228	4554.53	388.891		1352	256	18643
	1302	1193.75	345.773		1181	413.837	8876.37												1157	52.8696	1.84783		1221	12	499.007			1290	832.664	55.1094		1491	1379.63	1027.63			1229	818.25	18.1111		1354	2473.58	1143.91
	1303	2925.8	61818.4		1182	565.573	1742.22												1159	56.8232	-6.07955		1222	23.0592	1036.22			1292	801.274	120.5		1492	858.528	187.333			1230	1158.74	40.3433		1355	2256.19	789.875
	1304	1663.12	324.4		1183	1126.71	3858.38												1160	1584.15	-9.68421		1223	-33.625	1113.23			1293	2539.82	145.818		1494	1234.19	146.078			1231	2656.49	93.0069		1356	629.658	4526.95
	1306	1279.12	6457.31		1184	253.173	10304.5												1161	513.75	57.75		1224	-12.4545	601.295			1294	3348.51	232.896		1496	1053.69	116.312			1232	1716.65	55.1196		1357	787.5	307.31
	1307	586.571	15151		1185	752.278	4154.06												1163	842.603	9.99375		1225	-112.132	2914.21			1295	16489.7	1849.84		1497	990.911	234.726			1233	1600.24	76.4118		1358	291.776	5282.11
	1309	417.031	365.344		1186	919.639	2536.62												1164	636.819	32.6187		1226	101.708	1179.5			1296	1523.28	256.901		1498	786.158	20049.3			1234	1052.94	121.75		1359	1285.21	172.576
	1311	1351.26	269.174		1187	1233.8	5221.17												1165	27.6522	32.6957		1227	-32	1362.25			1297	754.368	65.6184		1499	1425.74	325.75			1235	708.217	8.67763		1361	1390.19	10815.9
	1312	875.934	242.724		1188	434.594	3311.84												1166	19.2	-2.3		1229	9	1154.5			1298	706.188	2.35938		1500	419.75	11568.8			1236	545.07	59.0078		1364	193.969	10704.3
	1313	558.875	275.469		1189	90.9643	8613.18												1167	955.765	44.5662		1230	977.474	76.1053			1300	2290.86	142.5		1501	1340.25	300.25			1237	4051.93	543.163		1365	3856.64	3999.91
	1314	3528.38	1168.25		1190	838.906	1734.84												1168	365.333	5.75		1231	-38.32	1444.88			1301	1328.68	146.265		1503	4679.53	460.028			1238	2569.11	45.6316		1366	821.447	176.267
	1315	857.348	637.826		1191	639.837	2662.21												1169	33.6689	-4.05921		1232	8.50658	1167.92			1302	1790.71	-21.4342		1504	1520.74	353.348			1239	1430.93	75.7614		1368	7046.19	7139.19
	1316	1666.25	223.759		1193	365.188	5205.16												1170	-4.64286	12.0469		1233	-19.5461	1324.27			1303	15967.4	763.642		1505	12292	12670.1			1240	1110.75	49.5		1370	2882.33	911.417
	1317	4693.37	2776		1194	1801.81	4961.27												1171	740	21.5		1235	869.266	112.523			1304	1148.25	74.2895		1507	410.316	1148.11			1241	2006.05	114.62		1371	780.304	350.97
	1318	429.885	2410.25		1195	795.5	1753.75												1172	600.075	24.875		1236	-10.375	2123.82			1305	1163.86	69.4539		1508	4571.21	588.211			1243	920.958	-69.3472		1372	902.355	445.079
	1319	3748.13	2817.87		1196	1101.77	4565.9												1173	1219	-3.31579		1237	-193.732	13656.6			1306	348.25	7499.58		1511	1319.44	3319.59			1244	630.2	-10.15		1373	1647.86	4875.94
	1320	567.578	259.429		1198	607.563	2891.78												1174	905.6	43.4		1238	1044.65	147.883			1307	756.656	28.1375		1512	1361.88	6768.87			1245	2427.18	1027.88		1374	713.5	113.813
	1321	1394.11	535.263		1199	384.188	3031.52												1176	-0.121951	-2.52273		1239	19.3158	1135.95			1308	4335.2	324.329		1513	4713.69	430.192			1246	1714.88	58.7105		1375	240.809	7219.33
	1322	1326.3	773.451		1200	578.062	3189.17												1177	76.2792	1.29375		1240	-138.995	4224.78			1310	1316.64	130.566		1516	940.721	109.059			1249	685.868	79.3467		1376	1893.8	1136.04
	1323	3889	1380.15		1201	458.228	13851.7												1178	915.757	6.31618		1241	11.3971	821.279			1311	661.104	1154.86		1517	1916.23	1059.86			1252	1314.17	239.299		1377	993.52	2087.95
	1324	1263.3	465.5		1202	699.525	2525.71												1179	6.76136	11.2841		1242	-65.0515	760.978			1312	14094	752.157		1519	2295.66	326.273			1253	2060.45	150.535		1378	1929.05	1005.42
	1325	2074.59	549.438		1203	332.45	10779.7												1180	336.35	-24.5		1243	-18.4605	805.184			1313	1458.28	112.838		1520	864.132	56.2763			1254	29454.9	1753.57		1379	157.329	6933.29
	1326	505.389	174.25		1205	3214.16	80512.4												1181	363.913	1.375		1244	-40.1615	1993.84			1316	1064.57	81.75		1521	726.675	54.625			1255	1200	286.625		1380	13131.9	4907.83
	1327	1095.71	638.571		1206	4432.65	27286.3												1182	1180.64	8.23684		1245	-11.7632	794.164			1317	763.714	84		1522	808.074	91.25			1256	782.398	7166.49		1381	1556.72	1664.69
	1328	1771.48	1232.78		1207	4782.77	25441.2												1183	2749.17	41.0455		1246	-92.3533	2618.77			1318	1624.78	115.257		1523	1962.1	744.868			1257	703.042	58.5417		1383	454.647	164.301
	1329	2246.28	576.974		1208	1413.52	5788.32												1184	7.125	-48.9375		1247	2242.55	71.0658			1319	2521.03	56.7778		1524	4301.38	587.467			1258	2213.59	1118.83		1384	1019.36	383.021
	1332	2902.95	1766.4		1209	110.562	10322												1185	74.5	-9		1249	-56.6823	2339.47			1320	1493.6	124.14		1526	1287.46	38067.5			1259	2243.49	179.53		1385	843.158	348.211
	1333	1305.64	3965.8		1210	181.116	7520.05												1186	1805.92	6.02778		1251	8.375	912.729			1321	5852.14	722.139		1530	1475.32	132.536			1260	1752.88	102.645		1386	815.756	365.613
	1335	2502	527.114		1211	480.115	8230.42												1187	110.917	-14.5		1253	-65.9948	2815.8			1322	650.25	-33.25		1531	4517.64	1025.79			1261	4643.1	346		1387	3520.4	1224.01
	1336	1238.69	741.006		1212	248.788	4500.77												1188	2301.45	73.5		1256	1771.44	318.591			1323	3559.66	163.322		1532	1264.78	274.868			1262	392.41	268.042		1388	510.95	246.1
	1337	2156.55	1598.15		1213	754.812	2551.11												1189	582.925	82.775		1257	6083.7	208.05			1325	908.663	169.241		1533	1420.2	11687.9			1263	5647.25	73.125		1389	3833.46	2054.86
	1338	1280.39	20795.3		1214	720.78	2344.25												1190	1085.54	18.8684		1258	-57.0526	2382.42			1326	1167.04	28.1397		1534	3264.64	15881.5			1264	1706.52	222.405		1390	658.029	224.735
	1339	935.283	2527.89		1215	1230.75	3780.8												1191	400.893	6.5		1259	-34.1944	596.056			1327	3395.99	239.145		1535	482.542	421.236			1265	1658.18	107.612		1391	372.67	9152.05
	1340	263.673	8224.29		1217	28.4219	18287.5												1192	71.5161	2.71875		1260	-162.303	7704.67			1329	2279.67	235.635		1536	1219.75	216.125			1266	6391.62	-1.92233		1393	419.087	4017.39
	1341	3227.24	1628.42		1219	742.389	2977.13												1193	3677.91	78.5329		1261	1952.52	188.859			1330	4057.64	210.522		1537	859.488	98.3333			1267	907.426	-24.7426		1394	428.893	1089.08
	1342	1439.63	75869.6		1220	897.274	20256.7												1194	895.15	48.3		1263	-21.5813	1866.74			1331	1001.97	319.211		1538	5276.1	2439.72			1268	2128.58	88.4342		1395	126.63	10676.7
	1344	3977.48	2798.56		1221	538.75	4568.25												1195	787.5	45.625		1264	2.31579	985.526			1332	412.185	8808.67		1539	6339.21	717.625			1269	3988.29	302.544		1396	3148.96	3040.95
	1345	1745.86	251.099		1222	1134.36	5951.88												1196	706.588	54.6618		1265	41.9479	1220.43			1333	1545.66	159.694		1541	3331.85	337.962			1270	862.8	12.6		1397	3185.55	1060.18
	1346	1778.58	562.195		1223	1871.03	6263.43												1197	657.132	-33.0987		1266	20.4643	8.17857			1334	1143.41	58.2353		1544	753.553	508.072			1271	1028.53	110.094		1398	1420.33	341.239
	1347	2692.82	682.975		1225	1841.71	7844.42												1198	916.947	20.7895		1267	839.778	21.1667			1335	874.625	155.375		1545	2934.26	481.881			1272	3943.53	232.273		1399	1003	146.313
	1348	743.25	1000.21		1226	5200.19	12895.2												1199	509.542	29.8611		1268	1069.11	2.9375			1336	103.278	21.6667		1546	3020.59	216.507			1273	31.5625	-4.09574		1400	2369.58	759.789
	1349	1952.08	966.25		1227	797	29446.9												1201	9.3625	1.4125		1269	373.868	5.29167			1337	2269.04	973.25		1547	1080.56	13.8026			1274	1378.87	117.632		1401	1511.62	940.625
	1350	1600	546		1228	490.333	2080.21												1202	837.691	24.8421		1271	-18.6902	1130.95			1338	2321.24	144.118		1548	1861.82	40603.7			1275	2372.9	280.132		1402	2270.61	1374.17
	1351	1739.29	1175.01		1229	1353.19	2884.94												1203	722.078	-38.9531		1273	628.414	15.7039			1339	1952.05	189		1549	1457.65	139.306			1276	2605.48	520.711		1403	578.75	144.625
	1352	2196.53	851.95		1230	2468.42	8754.21												1204	910.944	30.2361		1274	-38.3889	900.958			1340	3151.72	84.8125		1550	1558.03	233			1277	1075.93	84.4079		1404	1269.25	710.812
	1353	3223.94	1540.86		1232	1041.52	3736.78												1205	775.6	6.425		1275	14.8421	676.553			1341	1601.17	56.5		1552	8495.81	243.292			1278	600.5	171.127		1405	3332.24	827.954
	1354	1300.6	286.6		1233	4592.71	27843.3												1206	-9.975	-0.675		1276	-18.1184	1586.28			1342	886.812	47.625		1554	1087.25	4192.25			1279	1068.68	92.7105		1406	1488	683.724
	1355	1160.4	97.825		1234	334.8	21832.8												1207	657.196	-19.6389		1277	83.625	982.111			1343	1027.34	13.2569		1555	12020.9	3118.5			1282	9534.34	602.14		1407	1100.32	681.645
	1356	850.886	262.375		1236	949.5	3349.09												1208	1921.2	60.1522		1278	478.397	374.912			1344	867.375	85.625		1556	1369.75	335.778			1283	850.086	73.3359		1409	935.744	370.841
	1357	1457.83	718.493		1237	952.729	3096.32												1209	32.6339	0.6875		1279	-66.5789	1069.51			1345	708	-115.328		1560	4711.23	593.079			1284	3761	287.174		1410	1019.97	973.613
	1358	2796.54	1194.09		1238	585.333	17749												1211	749.625	30.9444		1280	1072.77	39.4211			1346	4995.93	215.796		1561	850.706	63.9412			1285	22578	1466.11		1411	165.859	6577.52
	1359	1539.09	692.469		1239	520.648	13390.9												1212	833.062	21.8125		1281	-38.1974	1454.62			1347	20207.1	1283.62		1562	1990.73	675.158			1286	1816.02	221.034		1412	203.06	11199.6
	1360	3309.7	1645.13		1240	2269.44	5217.25												1214	61.2903	-4.0625		1282	39.4013	863.52			1348	1918.73	75.0066		1563	4635.59	698			1287	945.917	95.375		1413	1867.31	1478.55
	1361	340.111	410.778		1241	697.115	5471.02												1215	947.935	-23.9688		1283	-184.955	7762.21			1349	1616.9	145.651		1564	2524.95	302.789			1288	1987.6	-82.6		1414	1063.62	231.875
	1362	1858.76	384.38		1242	1017.16	24924.7												1216	831.053	-25.4737		1284	-33.3333	3489.83			1350	3435.3	-73.4		1565	1496.3	219.602			1289	1111.25	187.06		1415	184.533	7625.54
	1364	494.891	10771.8		1243	3648.54	33713.6												1217	761.038	25.8		1285	-92.8158	1419.01			1351	943.262	236		1566	3499.66	2290.97			1290	3157.39	495.08		1416	782.188	230.75
	1365	3249.79	661.053		1244	987.175	5577.14												1218	-4.13393	-8.79464		1286	805.855	127.118			1352	2385.38	116.5		1567	499.356	194.081			1291	2764.74	126.974		1417	367.444	164.014
	1366	1194.35	126.45		1245	1050.09	43148.8												1219	607.267	-23.2955		1287	-88.0263	4720.93			1353	2146.06	138.292		1568	984.979	1470.38			1292	499.958	91.6875		1418	335.417	10216.3
	1367	907.37	731.844		1246	778.694	3797.54												1220	747.254	-9.875		1288	-10.5833	5724.45			1354	1920.53	273.579		1569	830.917	123.071			1293	3754	-31.0489		1420	2915.39	6110.84
	1368	2662.93	311.281		1247	2636.77	43034.5												1221	515.812	12.1875		1289	-33.8696	1407.57			1355	11905.7	656.909		1570	2298.25	873.395			1294	2061.25	298.75		1421	1253.91	502.483
	1370	507.5	188.875		1249	386.029	19030.8												1222	590.844	24.2656		1290	-82.6667	1896.33			1356	593.625	41.375		1572	1650.41	347.955			1295	736.862	112.237		1422	495.914	426.8
	1371	1942.12	4674.19		1250	811.25	3244.86												1223	1175.74	48.5882		1291	12.9716	1020.14			1357	374.083	596.146		1574	307.778	7368.11			1296	1062.3	126.312		1423	920.722	34896.5
	1372	336.75	1835		1251	949.483	17258.2												1224	0	0		1292	657.926	71.1618			1358	799.09	26.6974		1576	3115.43	472.776			1297	1054.92	63.4531		1424	696.579	606.526
	1373	1502.84	1016.67		1252	899.888	7323.91												1225	938.039	-36.1974		1293	-58.2566	1137.28			1359	23797.4	1707.12		1577	5759.3	747.043			1298	120	17552		1425	496.188	295.687
	1375	1563.9	418.552		1253	949.535	15316.9												1226	930.062	50.8875		1294	-5.14474	1906.18			1360	768.763	35.4342		1578	1840.06	290.875			1299	3362.42	2764.59		1427	628.523	433.234
	1376	1057.67	270.944		1255	342.606	18108.1												1227	1128.68	44.3889		1295	538.73	37.6711			1361	600.083	28.25		1579	338.875	-17.625			1300	911.847	104.278		1429	1855.51	895.332
	1377	1290.64	285.25		1256	4173.75	59307.3												1228	701.456	7.94118		1296	331.088	284.235			1362	140.663	8434.05		1580	786.938	53.8438			1301	849.5	137.5		1430	1444.78	1269.11
	1378	952.875	641.938		1257	1121.79	5282.62												1229	779.667	66.125		1298	121.961	3712.18			1365	472.444	-26.8194		1581	897.158	166.684			1302	1046.47	161.775		1431	1310.49	572.451
	1379	2850.21	832.91		1258	666.188	7694.47												1230	17.0549	8.56522		1299	-110.217	8406.06			1366	18903.8	1018.92		1582	629.583	273.655			1303	1429.12	27.4539		1432	6478.37	3000.97
	1380	2158.56	182.547		1259	577.641	2314.95												1231	922.19	25.0588		1300	-31.0066	1144.95			1367	3281.37	352.895		1583	8366.16	1057.98			1304	3	-8.9		1433	1021.28	1110.84
	1381	1411.52	1040.14		1260	171.975	5367.75												1232	884.603	137.89		1302	-105.868	2629.74			1368	1304.4	103.681		1584	1740.38	246.431			1305	13121.2	1416.55		1434	6908.15	15790.7
	1382	1567.71	582.165		1261	755.2	1533.8												1233	326.346	26.6625		1303	-83.2697	2186.22			1369	1320.25	61.25		1585	1055.08	187.039			1307	3225.67	4187.96		1435	722.368	283.896
	1384	1374.73	203.076		1262	1194.59	7832.11												1234	823.375	-12.4028		1304	-119.991	8996.75			1370	742.265	11.5588		1586	3119.47	477.289			1308	1658.44	626.582		1436	522.514	258.194
	1385	517.306	415.528		1263	692.118	25187.8												1235	27.2188	5.0625		1306	-30.625	2108.25			1371	9468.69	400.625		1587	3274.58	429.63			1309	8463.24	538.64		1438	1431.99	561.417
	1387	1564.94	265.43		1264	1342.28	7363.97												1236	708.486	-18.1528		1307	2182.68	311.223			1372	16504.8	833.812		1588	1833.42	525.474			1310	5444.5	883		1439	1653.54	37.0238
	1388	3902.06	767.596		1265	1481.11	5689.59												1237	12.4231	1.09615		1308	-13.9896	1093.18			1373	62000.8	3082.61		1589	2726	474			1311	784.111	8.63889		1440	5226.06	1255.76
	1389	992.237	813.175		1266	1064.5	4959.36												1239	1562.85	5.29412		1309	-2.73026	995.303			1374	1358.12	78.6912		1590	4234.61	681.804			1312	946.875	20.5156		1441	1055.42	655.421
	1390	2178.24	1087.44		1267	2573.38	15492.5												1240	1246	-1.63158		1310	909.625	191.869			1375	931.368	110.346		1591	1217.53	85.7895			1314	7527.53	863.62		1442	2411.3	537.224
	1391	4685.5	6156.47		1268	2408.85	7638.79												1242	184.438	-0.2875		1311	-25.1176	693.353			1376	1236.75	67.8333		1592	4839.92	925.626			1315	4010.77	107.846		1443	950.632	332.76
	1392	918.75	568.938		1269	1660.68	19937												1243	1001.05	-21.45		1312	-71.2917	2332.38			1377	1368.79	74.6397		1593	834.204	245.993			1316	546.156	104.133		1444	2524.42	893.105
	1393	1957.1	853.441		1270	1048.74	1769.24												1244	465.75	29.25		1313	32.375	-24			1378	1702.5	193.5		1594	5407.83	506.98			1318	6420.85	491.396		1445	497.263	1263
	1394	658.6	569		1271	1182.04	6141.21												1245	2561.57	91.8092		1314	1850.8	108.395			1379	1691.17	877.826		1595	1783.88	155.5			1319	2382.55	803.522		1446	7027.89	4286.95
	1395	2397.09	670.396		1272	2492.62	11061.6												1246	1372.46	3.89706		1315	29.3462	7240.54			1380	6102.92	347.5		1597	1221.08	126.958			1320	1477.05	283.27		1447	1313.48	417.465
	1397	741.113	389.85		1273	795.452	18241.2												1247	159.6	9.5		1316	-11.8056	1402.33			1381	5745.2	385.475		1598	2199.02	388.125			1321	11370.7	929.972		1448	853.537	317.295
	1398	1338.87	598.13		1274	702.566	35955.9												1249	1200.59	-165.306		1317	-25.875	1229.75			1382	1020.36	117.764		1599	466.097	22618.2			1322	3438.38	-21.2171		1449	886.651	451.408
	1399	1122.5	413		1275	1785.29	3610.32												1250	646.289	-33.6118		1318	-106.24	5783.76			1383	1635.33	211.613		1600	12057.3	2041.4			1323	866.5	7.25		1450	323.86	22284.7
	1400	2853	1026.85		1276	283.833	23741.3												1251	30.2679	-0.25		1319	-27.6397	774.39			1384	1606.13	105.08		1602	284.833	22993.8			1324	11224.8	1023.81		1452	1367.45	261.227
	1401	976.261	-116.451		1277	1489.98	5740.73												1252	1284.44	42.7153		1320	-95.1852	4921.96			1385	1445.26	170.167		1604	3088.8	335.984			1325	331.438	182.141		1453	541.75	193.785
	1402	2598.97	1119.22		1278	1638.69	3931.32												1253	695	24.5		1321	12.1579	701.368			1386	1247.11	549.579		1605	432.438	675.799			1326	2260.88	200.25		1454	1062.22	430.622
	1403	1658.44	556.167		1279	1020.88	-247.747												1254	1156.24	86.1176		1322	-33.1771	1472.89			1387	633.703	47.8125		1608	420	829.043			1327	3382.22	145.054		1455	2022.74	462.947
	1405	975.775	659.481		1280	856.51	2558.29												1257	135.863	-16.475		1323	-24.1181	1036.38			1388	1277.2	80.2857		1609	1201.84	524.658			1328	899.592	-74.0395		1456	3352.56	2038.13
	1406	1247.61	3060		1281	528.974	7657.82												1258	2752.82	-35.0132		1324	175.74	6661.97			1389	1714.62	92.5893		1610	1323.81	453.375			1329	1486.33	100.028		1458	653.658	1013.26
	1408	3853.4	1294		1282	1557.61	50892.7												1259	2270.29	52.8043		1325	21.375	2048.19			1390	9373.71	549.605		1611	5656.5	866.87			1330	4892.78	756.013		1460	2192.89	836.667
	1409	1640.97	20319.7		1283	706.956	1092.17												1260	523.219	-11.0625		1326	-11.3333	935			1391	6910.21	425.685		1612	763.994	-173.65			1331	885.75	101.717		1461	1589.17	706.757
	1410	1816.98	458.32		1284	1245.53	4037.12												1261	25.4327	2.54808		1327	20.9375	2652.44			1392	1159.06	109.309		1613	922.789	96.5921			1332	18537.4	1154.33		1462	654.309	379.551
	1411	757.321	16698.3		1286	1269.58	1036.24												1262	52.1339	7.63393		1328	-112.64	2087.91			1393	18055.9	758.688		1615	938.647	138.029			1333	10361.5	3305.89		1464	443	18014.6
	1412	1042.6	133.8		1287	1569.22	6149.46												1263	496.597	-3.41667		1329	-20.1316	818.507			1394	579.25	20.875		1616	3502.93	161.158			1334	1161.73	177.831		1465	533.961	197.52
	1413	2277.57	1789.85		1288	231.032	6957.69												1264	980.52	11.1053		1330	-54.1	3440.05			1395	619.475	-28.6937		1618	6093.86	1031.75			1335	4615.66	299.283		1466	10475.4	3282.27
	1414	1818.93	441		1290	344.759	20064												1265	35.9872	6.75		1331	9289.92	320.27			1396	564.181	515.222		1620	3542.14	834.109			1336	2398.72	585.832		1467	962.103	325.522
	1415	1728.97	293.25		1291	955.308	3649.41												1266	1071.12	58.2847		1332	-27.2763	2676.51			1397	747.586	6.63158		1622	2409.43	1033.87			1337	7497.79	456.521		1468	670.365	22775.1
	1416	609.829	59347.8		1293	896	1533.72												1267	6.4875	0.6625		1333	-35.0769	4159.23			1398	38858.5	2123.93		1623	600.29	629.966			1338	647.178	-21.4539		1469	739.6	4686.27
	1417	471.781	154.406		1294	769.31	21142												1268	26.6481	1.32143		1334	-38.1842	1421.83			1399	2877.7	93.0724		1624	886.875	184.218			1339	2179.54	2187.3		1470	3290.06	2645.06
	1418	1919.6	894.778		1295	678.212	7183.05												1269	745.808	32		1335	-70.631	2254.42			1400	4462.8	140.042		1625	3808.01	855.853			1340	417.875	29.7353		1471	798.447	591.882
	1419	2721.75	7728.67		1296	5221.94	14732.7												1270	821.985	47.5074		1336	1371.45	49.5455			1401	1519.67	3		1627	1774.88	272.354			1341	387	1092.31		1472	744.289	2936.34
	1420	2710.82	1191.31		1297	196.787	8234.7												1271	1056.52	57.625		1337	0.578947	1758.32			1402	2137.35	71.625		1628	2943.39	599.932			1342	905.461	50.7467		1473	1137.41	604.46
	1422	2207.52	309.644		1298	759.139	2129.22												1272	1104.74	3.7875		1338	-43.2171	1020.61			1403	1013.76	9.40441		1629	593.653	159.583			1343	833.062	146.312		1474	532.333	4324
	1423	1774.6	553.989		1299	160.312	8915.43												1273	3287.71	17.6786		1339	-44.3854	1722.95			1404	1186.44	111.444		1630	1603.09	550.211			1345	5789.45	1428.83		1475	154.963	11179.2
	1424	133.89	9891.12		1300	46.25	7677.12												1274	109.438	2.68452		1340	869	34.7778			1405	743.219	4.875		1632	6294.24	1039.88			1346	703.941	148.145		1476	918.2	185.077
	1426	603.89	351.596		1301	2345.56	9419.11												1275	8.25	-1.375		1341	-50.6184	1822.3			1407	2361.97	211.576		1634	843.344	3736.4			1348	1313.54	70.2578		1477	4789.89	1273.29
	1427	386.663	15707.8		1302	860.688	2958.39												1276	5437.54	211.75		1342	-67.4022	1585.14			1408	966.485	7.35294		1635	4700.05	3406.72			1349	754.235	119.971		1478	681.706	219.118
	1428	2556.41	2975.03		1303	1368.63	4665.92												1277	17.3182	8.68182		1343	824.706	25.2206			1412	2661.99	330.75		1636	2365.47	329.421			1350	848.692	2781.38		1479	1058.37	43744.8
	1429	1305.83	343.891		1304	1735.6	11747.2												1278	1431.36	30.6711		1344	-48.3947	1562.68			1413	2948.95	268.033		1637	10417.6	1101.8			1351	3518.67	260.989		1480	152.556	10523.3
	1430	4696.69	2207.1		1305	1245.25	2980.18												1279	362.788	13.9		1345	6.63194	1784.29			1414	844.225	111.6		1639	1270.66	338.66			1352	5651.93	570.514		1481	759.5	1009
	1431	372.711	37.3882		1306	2097.35	32568.4												1280	553.962	0.1		1346	-87.3077	4978.55			1416	1001.8	109.664		1640	673.129	20562.3			1353	2398.37	161.474		1482	6856.72	2375.52
	1432	1012.12	1060.77		1307	1062.5	5301.41												1281	813.125	-43.8333		1347	21.2679	4130.34			1417	5354.7	139.618		1643	467.956	89.1691			1354	0.875	-13		1483	762.676	242.836
	1434	2575.8	1637.46		1308	1501.31	6404.99												1282	532.167	-13		1348	-50.2895	1236.01			1418	7598.93	735.365		1644	1240.15	118.599			1355	801.882	-10.4118		1485	162.86	5805.35
	1435	4769.83	8709.52		1309	204.393	12679.7												1283	71.7321	61.6071		1350	46.0329	1057.32			1419	0	0		1645	4094.53	759.48			1356	1465.68	42.6736		1487	209.344	28756.3
	1436	1053.73	198.253		1310	172.208	16814.3												1284	1339.12	23.5		1351	-23.5263	801.217			1420	1870.69	-51.869		1646	1205.5	645.75			1357	1317.85	137.681		1488	835.444	20171
	1437	1181.55	4000.1		1311	745.475	3107.65												1285	420.286	-4.80556		1352	-34.0921	1684.36			1421	956.75	24.0588		1647	773.94	21544.5			1358	2085.75	124.437		1489	245.408	6615.82
	1438	3982.64	1011.6		1312	955.13	8890.24												1287	14	4.60526		1353	-77.7656	4343.8			1422	888.344	17.2656		1648	1836.74	1111.11			1359	1434.94	-21.0208		1490	340.926	12650.5
	1439	1070.6	180.6		1313	2181.88	26932.2												1288	65.2	11.8261		1354	-333.828	15966.2			1423	1028.69	76.6875		1649	4677.89	2028.82			1360	8753.26	1027.26		1491	1731.96	3358.77
	1440	1575.88	345.625		1314	549.005	3382.08												1289	922.25	2		1356	6.15789	864.105			1424	644.179	42.25		1651	1574.33	5295.35			1361	1263.25	391.5		1492	78.7692	8593.04
	1441	2482.1	1060.33		1315	713.927	1784.12												1290	844.544	17.1029		1357	-23.3958	944.146			1425	1492.11	95.9474		1652	845.763	312.467			1362	8032.46	2329.56		1493	519.219	293.625
	1443	1864.87	195.413		1316	219.514	14632												1291	1164	17		1358	-46.8816	950.408			1426	896.162	-5		1653	658.958	291.482			1363	1069.74	57430.1		1494	280.852	10388.7
	1444	846.484	588.913		1317	426.719	2650.82												1292	-21.475	-18.225		1360	0.526316	2149.82			1427	16616	960.28		1654	836.5	20.5			1364	6690.4	738.54		1495	210.611	13311.5
	1446	410.236	503.845		1318	3202.5	17842.6												1293	873.776	70.4079		1361	775.471	72.4118			1428	1974.61	326.722		1655	1497.81	52.3125			1365	2784.11	126.461		1496	2131.5	495.065
	1447	780.632	394.145		1319	447.827	11133.1												1295	475.891	-20.0312		1362	-8.48913	1474.54			1429	2649.3	6989.08		1656	13109.8	9511.96			1366	353.332	8620.58		1497	5408	1840.78
	1448	556.208	236.688		1320	2616.87	16762.5												1296	5.25	-12.15		1363	1660.34	-31.0132			1430	1964.78	77.087		1657	1684.53	104.176			1367	1392.28	185.25		1498	547.706	276.029
	1449	420.068	732.75		1321	2401.09	26351.3												1297	0	0		1364	-10.1184	921.526			1431	1354.76	96.25		1658	3220.72	7311.08			1368	9348	436.204		1499	978.829	1631.04
	1452	3792.38	2714.23		1322	1210.55	3258.22												1298	835.734	62.0875		1365	-27.6053	1130.97			1432	2188.56	63.5724		1659	3407.36	363.912			1369	10965.4	615.96		1500	661.559	202.735
	1453	3076.25	1438.19		1323	642.417	8602.34												1299	62.7609	0.5		1366	-79.8421	1460.05			1434	226.111	-54.5556		1660	1210.84	220.579			1370	3222.32	894.333		1501	2998.59	716.426
	1455	2962.88	2505.22		1324	1297.14	30582.9												1300	630.525	24.175		1367	-139.303	6460.71			1435	2312.36	198.102		1661	1400.55	-1.42763			1371	1477.76	110.158		1502	1122.32	427.426
	1456	2224.56	603.104		1325	973.297	37674												1301	26.2031	-11.7059		1368	-35.9211	741.908			1436	1970.99	37072.1		1662	1873.12	115			1372	3061	287		1503	948.612	722.875
	1458	2725.25	4379.69		1326	4001.83	72053.1												1302	1753.51	43.5875		1369	2541.05	35.9474			1437	2281.03	641.652		1665	4946.6	1705.47			1373	7797.68	550.5		1504	2750.34	1429.83
	1459	1129.02	1222.43		1327	1020.04	4785.56												1303	1402.81	-47.6667		1370	14.587	1102.2			1438	1892.51	135.076		1666	988.053	89.6316			1374	1290.54	-10.8209		1507	2172.83	-18.1667
	1460	1008.01	355.229		1328	3501.17	7662.93												1304	881.421	6.7		1371	-21.7105	1628.62			1439	1495.06	-1.80556		1667	1723.51	352.393			1375	1716.83	-416.4		1508	543.354	450.312
	1461	2178.38	791.64		1329	1505.16	36276.8												1305	511.441	-22.5588		1372	-11.2609	1060.96			1441	2670.14	431.83		1668	1781.5	471			1376	2058.89	83.7297		1509	2416.11	1146.11
	1462	3562.69	1072.73		1331	1132.46	3228.74												1307	742.971	35.4632		1373	16.1667	1763.75			1442	1970.32	115.966		1669	1520.01	3901.95			1378	623.549	1747.27		1511	719.546	1989.68
	1463	1354.82	346.426		1332	908.25	4615.62												1308	473.188	-12.75		1374	875.658	88.0263			1443	4609.62	166.066		1671	4544.43	60.715			1379	593.053	146.737		1512	1653.66	9354.7
	1464	2068.19	1338.33		1333	843.788	4070.37												1309	367.047	-6.74219		1375	-92.625	3978.55			1444	2893	61.9408		1673	686.757	113.928			1380	1020.74	151.079		1513	1063.23	30484.3
	1465	593.663	226.663		1334	457.13	1053.53												1310	426.7	101.342		1377	-24.31	2661.84			1445	1175.18	131.824		1674	781.75	6056.58			1381	999.566	6228.02		1514	1132.45	392.263
	1466	671.838	3112.07		1335	3020.39	20297												1311	550.375	11.1875		1378	-7.10526	1753.34			1446	1303.54	29.8125		1675	6295.63	890.875			1382	4507.4	320.01		1515	860.944	143.778
	1467	413.525	4353.71		1336	643.939	24200.4												1312	1046.84	22.5789		1379	-21.3026	948.678			1447	3615.96	258.837		1676	1316.67	218.264			1384	921.268	-90.241		1516	1294.28	849.514
	1468	278.5	2029.69		1337	315.324	31787.3												1313	776.25	-38.6667		1380	65.875	2570.5			1448	1798.37	144.944		1677	952.737	804.474			1385	883.132	591.289		1517	625.737	1857.78
	1469	2218.44	5398.02		1338	730.675	2189.43												1314	546.361	-40.125		1381	-10	1508.29			1449	1220.38	216.125		1678	882.158	1829.42			1387	2006.95	165.125		1518	407.944	140.778
	1470	694.266	427.799		1339	1230.16	4592.02												1315	-1.08824	13.2768		1383	-41.75	1342			1450	973.806	124.306		1680	2788.5	628.828			1388	2222.11	98.3929		1519	1696.35	15.5441
	1471	1101.58	329.316		1340	550.667	1188.54												1316	412.075	-23.85		1384	-33.5921	1313.11			1451	3736.97	282.618		1682	10209.6	8247.56			1389	5753.56	-494.663		1520	1630.92	2928.5
	1472	2343.73	347.091		1341	479.418	9229.1												1317	1831.53	10		1385	867.513	63.8026			1452	4897.03	352.099		1684	878.974	1051.53			1390	972.276	229.473		1521	1210.94	149.328
	1474	1505.68	341.38		1342	1036.11	50252.8												1318	1128.21	31.2557		1386	-65.9474	870.717			1453	1153.61	110.993		1685	5337.8	3214.67			1391	4523.66	363.46		1522	622.103	432.685
	1475	1053.22	339.572		1343	1000.24	4682.02												1319	1996.11	25.1579		1387	825.191	40.3382			1454	1716.3	15		1688	1085.36	147.81			1392	1713.03	19.9148		1523	4267.89	1243.47
	1476	1344.15	482.185		1344	4022.23	15321.9												1320	3.125	1.9625		1388	-36.975	3632.55			1455	1004.96	69.0329		1689	1262.55	604.636			1393	1336.75	707.625		1524	769.417	594.75
	1477	1039.12	281.994		1345	521	654.949												1321	76.9245	-22.9286		1389	-27.0526	1110.42			1456	965.529	6		1691	1328.78	210.824			1394	656.461	1469.28		1525	1482.33	480.024
	1478	985.761	92.0284		1346	1288.33	3835.44												1322	2037.01	39.75		1390	56.7895	3164.26			1457	1761.64	94.2222		1692	1254.71	288.875			1396	849.647	14.3382		1526	516.913	1528.67
	1480	2123.33	321.375		1347	322.962	16857.7												1323	466.156	-58.375		1391	-34.7566	851.743			1458	3713.74	132.659		1694	4410.13	781.913			1397	749.95	-44.95		1527	2761.45	1303.05
	1481	3156.84	103058		1348	1011.88	7996.94												1324	817.579	-101.526		1392	-35.7566	1000.03			1459	915.799	55.7708		1695	5203	3793.13			1398	915.228	108.022		1528	429.316	1071.5
	1482	1989.75	1990.69		1349	779.235	2412.41												1325	806.158	8.31579		1394	-28.2632	976.105			1460	1339.82	101.138		1696	8143.78	22630.1			1399	-25.8125	-8.5		1529	589.745	1340.33
	1483	2058.7	450.958		1351	1244.62	18992.4												1327	827.88	-8.26316		1395	-8.91667	943.111			1461	916.987	78.7763		1698	6805.02	968.606			1400	872	43.25		1530	2519.31	728.362
	1484	911.92	13022.3		1352	856.272	34278.3												1328	546.611	43.2708		1396	-15.5	2087.51			1463	886.287	-10.6		1699	8114.22	1659.1			1401	952.651	166.38		1533	1565	456.5
	1485	2893.83	5921.85		1353	1193.15	2862.62												1329	-34.2564	-21.875		1397	22.6842	931.599			1464	900.35	38.875		1701	5740.62	1420.38			1402	2337.37	767.405		1534	3903.2	1041.25
	1486	1378.67	9677.97		1354	345.6	15425.7												1330	528.276	-10.775		1398	4.36364	1066.82			1465	758.612	135.579		1702	4220.48	848.865			1403	2762.91	238.276		1535	2773.97	989.344
	1487	1274.17	481.585		1355	415.375	20377.4												1332	71.425	2.5125		1399	-159.438	3852.31			1467	10232.3	431.486		1704	762.821	3010.07			1404	2447.3	432.822		1537	524.987	226.414
	1489	185.947	5271.83		1356	217.19	6294.39												1334	947.974	118.079		1400	40.3026	3175.67			1468	725	36.6625		1705	863.083	1131.29			1405	-9.025	40.6375		1539	458.735	18997.1
	1490	788.333	215.917		1357	1447.16	22436.3												1335	585.538	10.025		1401	42.5652	999.304			1469	6538.03	718.443		1707	1009.28	269.605			1406	157.732	-27.3418		1541	513.529	442.507
	1491	2082.88	6297.7		1358	478.125	18692.8												1336	685.143	-13.619		1402	-24	1418.5			1470	1307.38	-175.744		1709	603.816	276.544			1407	11125.7	779.28		1542	1107.27	2526.05
	1493	2886.04	908.11		1360	570.081	1488.96												1337	770.822	16.5329		1403	1608.6	94.5066			1471	1173.83	108.011		1710	8003.28	1975.15			1408	630.412	172.471		1545	846.051	253.574
	1494	571.216	530.966		1361	347.353	13741.9												1338	9.9375	-1.09821		1404	-11.8542	1632.91			1472	3547.01	191.48		1714	5465.26	1487.92			1409	4041.92	390.627		1546	859.237	189.453
	1495	880.826	824.913		1362	527.05	2592.67												1339	5.075	1.85		1405	-123.2	6307.2			1473	1558.16	44.3947		1715	1571.86	-150.857			1410	1765.14	74.5461		1550	820.094	2747.31
	1496	1417.72	232.098		1363	1781.09	9449.05												1340	394.861	18.9583		1406	9.35526	661.145			1474	1370.86	101.408		1716	1549.75	306.92			1411	1671.71	508.043		1554	2730.99	5826.01
	1497	3282.19	58795.7		1364	1311.3	9814.58												1341	38.9079	7.79605		1407	-25.1053	2896.17			1475	763.368	-5.81579		1717	5162.04	3414.63			1412	2787.59	199.163		1556	756.15	216.646
	1498	2484.05	1252.44		1365	565.339	15406												1342	-30.95	4.5875		1409	-44.685	1935.78			1476	2045.64	224.421		1718	1601.24	63278.1			1413	1908.38	67.8587		1557	481	406
	1499	760.925	1016.87		1366	724.92	2772.67												1343	673.888	-9.30921		1410	-26.8971	456.5			1477	1786.17	-16.5395		1720	2641.7	518.174			1414	796.522	61.9779		1558	4175.79	3076.25
	1500	1649.75	462.375		1367	2554.99	20946.5												1344	588.25	26		1411	-72.8158	3203.39			1478	1796.75	57.25		1721	10192.6	1736.62			1415	1528.3	72.4671		1559	3280.94	2643.12
	1501	3884.38	645.5		1368	2202.33	18955.3												1345	513.547	41.5625		1412	-159.582	9608.1			1479	941.227	15.2812		1724	916.141	2683.58			1416	2018.62	85		1560	531.75	167.797
	1502	1024.56	443.675		1369	2592.68	9819.98												1346	63.0357	-5.5625		1413	-38.4931	992.368			1481	11473.9	418.116		1725	2023.08	163.5			1417	1817.77	337.597		1561	1031.69	419.557
	1503	3065.3	1224.9		1370	1682.26	8313.48												1347	567.719	40.5391		1414	26.9474	979.921			1482	7429.08	324.228		1726	4846.74	19338.7			1418	4371.09	377.059		1562	1567.39	948.835
	1504	737.263	210.947		1371	491.913	6367.12												1348	-9.51316	9.88636		1415	53.6316	2013.09			1483	1726.12	-13.6786		1728	1061.19	246.688			1419	1010.24	132.494		1563	692.987	878.467
	1505	847.833	22.6875		1372	551.562	2255.02												1349	810	-28.6071		1416	-47.13	2974.8			1484	8919.8	589.6		1730	1525.31	832.693			1420	1353.9	-7.77941		1565	530.441	722.717
	1506	2490.83	768.538		1373	1039.42	5392.02												1350	303.9	34.1375		1417	1194.68	457.949			1485	821.938	68.125		1733	2099.76	227.125			1421	4782.68	488.262		1566	1952	96.7229
	1507	927.625	542.45		1375	4503.57	13432.3												1351	833.765	-23.3824		1418	619.412	2.94118			1487	1649.58	136.417		1734	2418.33	2810.71			1422	3195.58	67.1042		1567	1689.18	1086.43
	1508	1328.29	332.542		1376	854.3	5152.1												1352	-26.0625	-12.625		1419	-41.0625	2820.62			1488	1267.32	151.941		1735	721.134	2479.44			1423	1118.44	228.086		1568	1244.5	150.566
	1509	3781.89	952.925		1377	795.062	4020.51												1353	425.25	-11.5625		1420	-44.625	956.025			1489	1845.56	182.756		1736	1514.86	221.013			1424	1000.77	186.381		1569	4314.8	5768.12
	1510	410.385	9447.38		1378	1940.85	7881.54												1354	63.575	2.5		1421	-122.292	3080.96			1490	30428.2	1559.48		1737	719.234	102.078			1425	998.425	-271.348		1570	852.763	423.297
	1511	514.773	208.545		1379	1937.01	92060.3												1355	1110.42	4.36842		1423	-67.8158	1665.03			1491	788.765	89.2941		1738	178.815	17987.3			1426	2025.43	262.451		1571	634.25	247.743
	1512	1185.93	5154.45		1380	932.802	4977												1356	564.429	-1.4375		1424	664.474	79.4737			1492	2143.04	1336.58		1740	6019.43	897.031			1427	12673	2871.83		1572	659.24	15425.5
	1513	136.134	8440		1381	1440.28	5498.7												1357	39.375	-26.4792		1425	-31.8421	1076.18			1493	6208.5	230.211		1741	4684.66	796.719			1428	1139.51	59.6187		1573	2644.7	4108.1
	1514	1293.6	119.114		1382	1003	4262.76												1358	829.75	85.0833		1426	-26.02	2352.53			1494	2336.7	289.696		1743	4765.45	1247.52			1429	830.125	179.213		1574	1550	1144.34
	1515	1098.36	235.387		1383	987.196	11116.3												1359	979.088	34.4118		1427	-424.056	13488.8			1495	1661.78	15.8807		1744	4372.67	516.729			1430	2186.41	134.026		1575	1247.27	398.483
	1516	327.783	-8.03289		1384	2265.07	14289												1360	1060.57	112.224		1428	-116.895	2183.68			1496	976.542	1.04167		1745	1050.36	4.73611			1431	1455.18	-113.835		1576	1910.98	709.408
	1517	131.154	11437.8		1385	4451.85	22784.4												1361	690.096	-22.2353		1429	1097.85	-21.5789			1497	1979.96	80.1118		1746	1500.38	-6.38889			1432	9596.92	1693.84		1577	1677.51	1435.57
	1519	760.688	276.763		1386	1139.44	3698.64												1362	562	74.2941		1430	-25.9474	956.579			1499	712.398	81.6094		1748	4997.24	674.299			1434	1115.94	651.25		1579	1023.46	101.02
	1520	1013	322.75		1387	1198.94	11061.3												1363	738.183	-13.8355		1432	853.515	75.5588			1500	1520.12	1780.25		1749	1859.24	2297.38			1435	2437	285.341		1580	3748.2	4617
	1521	2272.3	710.071		1389	180.855	14421.2												1364	993.059	32.4118		1433	-52.7391	2087.74			1501	1710.37	54.8421		1750	1776.58	108.792			1437	3627.24	289.08		1581	1586.5	2205.75
	1522	4040.35	1486.83		1390	1222.53	25695.4												1365	21.2	11.8		1434	-37.9737	2703.39			1503	958.215	143.312		1751	569.688	116.484			1439	3888.61	566.143		1582	437.611	187.347
	1524	729.153	27841.7		1391	787.712	2982.45												1366	9.05357	-6.07143		1435	14.8611	691.583			1504	9171.92	500.64		1752	1396.73	20.5972			1440	1246.74	987.211		1583	677.719	1620.76
	1525	194.426	5261.5		1392	928.107	43922.1												1367	57.6279	10.1522		1436	1003	253			1505	1574.92	149.361		1753	1053.58	540.474			1441	1313.95	91.0441		1584	327.172	193.797
	1526	4492.67	2256.68		1393	953.16	3705.31												1368	-33.675	2.8875		1437	-37.3264	1035.42			1506	1741.61	165.053		1754	767.224	63.7566			1442	2056.97	221.671		1585	275.026	2519.37
	1527	3213.76	1776.68		1394	2411.64	4837.04												1369	1398.68	111.421		1438	-29.8333	725.972			1508	2399.05	103.94		1755	679.375	273.25			1443	692.581	110.537		1586	614.917	302.771
	1528	1160.05	40367.6		1395	2067.19	7836.18												1370	59.5	2.25		1440	928.897	66.3676			1509	4649.98	324.543		1756	1225.22	202.778			1444	2018.74	-11.8736		1587	730.164	104.898
	1529	643.896	197.493		1396	1410.4	29803.1												1371	582.371	5.40972		1441	-89.0263	2557.34			1510	2077	67.2632		1757	1570.83	408.312			1445	3045.03	179.069		1588	126.077	7937.04
	1530	3991.27	1668.45		1397	1655.66	15327.2												1372	465.606	-6.1875		1442	1293.5	-53.5			1512	2115.25	5686.75		1758	822.092	158.401			1446	10235.2	1019.38		1589	3759.67	4565.23
	1531	881.25	76.875		1398	628.5	5976.96												1373	331.365	33.4062		1444	-22.0284	1831.67			1513	1630.26	115.344		1759	1650.03	345.728			1447	2814.42	604.158		1590	1700.34	517.849
	1532	598.441	143.824		1399	627.904	2207.82												1374	318.65	53		1445	-1.57955	989.352			1514	2682.52	87.1534		1760	688.5	176.737			1448	4346.83	176.779		1591	591.831	28993.3
	1533	1274.2	538.8		1400	943.297	4345.5												1375	33.8519	0.875		1446	-151.007	7244.86			1515	1080	92.8056		1761	1950.95	320.276			1450	1712.11	57.0789		1593	710.485	291.485
	1534	1818.55	269.836		1401	1078.31	5530.38												1376	0	0		1447	-31.1579	1868.16			1516	1829	183.5		1762	266.708	12430.3			1451	3719.7	1055.16		1594	6433.86	2651.7
	1537	736.395	346.263		1403	1121.69	10110												1378	134.66	-2.25625		1449	615.579	204.513			1517	1034.82	80.8235		1764	3118.93	1185.93			1452	2217.36	2267.08		1595	6456.24	3842.32
	1538	687.25	180		1404	1654.75	6312.28												1379	314.917	4.0625		1450	-10.212	1725.38			1518	3771.43	1798.38		1765	367.833	9274.79			1453	2594.74	206.543		1597	336.023	5503.75
	1542	906.294	107.769		1405	1858.33	7314.11												1380	490.4	-35.9625		1451	-14.8382	1167.75			1519	768.167	40.0208		1768	1785.33	439.483			1454	2182.65	121.609		1598	427.591	39.8182
	1543	526.342	88.5263		1407	406.796	11239.6												1381	438.25	95.625		1452	-92.5789	5039.71			1520	5795	5.78947		1769	3622.46	776.821			1455	15.5	12.4		1599	742.574	13582.2
	1544	3365.81	775.906		1408	3908.61	5162.8												1382	-29.25	6.7875		1453	2.21875	629.156			1521	3999.88	365.566		1770	1236.54	593.789			1456	1131.75	188.25		1600	810.662	603.118
	1545	415.4	2008.02		1409	637.908	4698												1383	919.588	41.0441		1454	-114.571	2998.85			1523	2403.38	109.625		1771	1733.47	297.285			1457	19.75	0.5		1601	2822.04	1241.91
	1546	996.801	429.955		1410	434.969	1675.21												1384	994.357	45.5714		1455	-22.1974	924.316			1524	4279.78	190.219		1772	1570.63	279.573			1458	22.1957	9.56522		1603	1949.24	751.632
	1547	1267.22	307.778		1411	4283.01	34656.2												1385	43.0727	-9.10714		1456	1110.86	31.5556			1525	233.581	6.75		1773	560.9	22238.4			1459	1304.32	53.1875		1604	6215.56	3336.42
	1548	1467.25	606.25		1412	4706.27	17861.1												1386	429.41	3.88235		1457	676.956	92.1838			1526	3040.45	185.589		1774	3536.45	1297.21			1460	3418.8	962.08		1605	349.661	1493.26
	1549	1411.09	423.304		1413	1217.65	9698.5												1387	1344.83	-1.425		1458	-4.77778	727.389			1528	717.757	-32.8542		1775	1979.45	552.408			1461	754.404	20.7132		1606	523.475	6355.95
	1550	1374.7	559.844		1414	577.656	6168.47												1388	959.25	-6		1459	1215.69	42.1705			1529	2234.12	253.597		1776	192.548	8351.08			1462	1395.64	-19.7976		1607	656.447	240.309
	1552	1803.61	1271.99		1415	550.256	5366.51												1389	988.691	23.8355		1460	-65.2868	673.221			1530	4856.29	342.316		1777	1201.22	144.546			1464	1131.56	97.8056		1608	779.125	413.801
	1553	1490.66	1004.98		1416	1868.23	6180.43												1390	1252.51	14.8187		1461	-125.327	8649.69			1531	1664.33	175.632		1778	722.447	147.342			1466	9017.35	4772.01		1610	1247.76	707.76
	1554	2219.28	587.875		1417	-36.2206	25762.5												1391	10.413	5.97826		1462	-126.763	796.875			1533	631.266	48.0469		1781	3063.47	552.158			1467	2466.14	661.835		1611	1061.84	890.908
	1555	1394.31	2873.44		1418	506.923	4652.46												1393	63.75	22.3125		1463	-37.3088	965.919			1534	1417.31	100.861		1783	8000.94	963.93			1468	3796.67	277.836		1612	473.434	288.25
	1556	1147.26	569.163		1419	1085.88	8692.88												1396	894.692	-20.5187		1464	1599.76	280.888			1535	695.195	101.812		1784	6956.76	882.802			1469	742.375	245.625		1614	727.706	182.574
	1557	1063.87	394.484		1420	3077.98	10069.8												1397	47.5741	2.40909		1465	1160.09	188.599			1538	1104.42	20.5221		1786	1255.12	-17.5			1470	2500.59	105.938		1615	1789.65	695.043
	1558	1612.59	573.114		1421	1967.3	9207.73												1398	12.2985	4.92647		1466	-6.02632	952.368			1540	3940.17	207.618		1787	548.077	8698.62			1471	1684.61	49.7867		1616	1586.2	746.25
	1559	2355	621.969		1422	1663.82	41442.8												1399	1298.76	66.1316		1467	-8.83333	741.333			1541	2153.48	141.716		1788	919.301	81.3657			1472	8079.18	1418.4		1617	1815.13	523.261
	1561	99.3	8170.02		1423	774.649	7206.94												1400	653.551	-14.5556		1468	-38.3333	916.125			1542	1512.26	60.4211		1790	1056.16	480.316			1473	317.521	179.396		1618	545.889	492.25
	1562	1821.04	957.25		1424	1125.38	25023.8												1401	1386.56	63.0556		1469	3.50658	1864.99			1543	1777.73	10.3618		1791	3042.56	411.438			1474	674.688	18		1621	1043.08	676.507
	1563	2724.07	257.386		1425	857.075	3350.77												1402	627.947	-21.5921		1471	2.8125	835.688			1544	1099.82	102.896		1792	864.611	267.076			1475	0	0		1622	1088.38	203.976
	1564	973.875	517.5		1426	1940.09	9150.14												1403	-1.275	-0.6875		1472	-114.086	8897.07			1546	1216.95	6.89474		1793	1220.87	307.368			1476	1555.5	82.5		1623	1443.32	549.368
	1565	954.494	811.938		1427	231	9927.15												1404	1014.55	48.5		1473	-114.458	1909.85			1547	243.091	-2.61111		1795	2797	2646.49			1477	6274.64	317.12		1624	772.355	30279.5
	1567	1064.58	314.925		1428	2534.21	12204.6												1405	1227.59	67.2187		1474	4421.43	194.112			1548	7525.84	339.474		1796	4485.24	617.072			1478	4308.96	772.154		1625	2008.4	2265.46
	1569	1572.56	1218.1		1429	1709.89	10929.9												1406	1092.73	72.5893		1475	1803.5	80.2656			1549	5454.57	283.792		1797	772.885	30378.6			1479	1874.96	783.105		1626	5479.09	2673.18
	1570	2853.95	100.411		1430	764.828	3340.11												1407	141.047	0.226562		1476	721.275	26.8625			1550	681.078	11.625		1798	5869.53	1041.26			1481	1668.6	108.678		1627	363.539	112.38
	1571	2818.72	-84.1319		1431	609.625	2485.68												1408	757.164	-4.39844		1477	90.2829	1213.33			1551	4077.26	367.576		1799	1595.66	85.0114			1482	746	1322.25		1628	3764.38	1230.34
	1572	1831.5	466.25		1432	1561.94	8739.64												1409	97.1667	-11.8125		1478	-100.438	2810.62			1552	2419.76	207.264		1800	874.901	232.52			1484	4866.8	643.02		1630	598.667	409.75
	1573	1609.68	743.977		1433	1029.12	2888.25												1410	3174.11	47.625		1479	-26.3333	811.556			1553	4201.6	1841.82		1802	570.605	963.033			1485	657.842	-101		1631	665.737	680.467
	1574	1714.31	284.25		1434	3030.52	14715.2												1411	656.354	2.36111		1480	459.044	23.2353			1554	1184.32	45.4211		1803	3401.16	419.438			1486	709.648	90.1429		1632	411.185	17707.6
	1577	845.513	341.669		1435	3580.97	45875.4												1412	1262.48	-33.3068		1481	5.14375	887.519			1555	3239.57	220.737		1804	323.685	6923.51			1487	645.722	91.8732		1635	482.8	313.538
	1578	3553.38	2520.53		1436	1038.9	4162.64												1413	1039.68	15.1579		1482	-31.4457	1124.53			1556	545.735	190.353		1805	2508.21	357.929			1488	397.279	53.75		1636	390.808	10722.7
	1579	1250.9	369.886		1437	2779.82	3152.19												1414	699.029	42.2059		1483	-7.11957	946.554			1557	1252.03	155.025		1806	1953.02	348.079			1489	1406	188.429		1638	1329.92	76.825
	1580	2364.9	328.1		1438	2345.19	58616.6												1415	1378.55	147.559		1484	31.5903	1039.78			1558	1021.56	63.8889		1807	740.395	545.171			1490	2012.04	840.848		1639	588.987	439.671
	1581	2514.95	451.321		1439	783.875	1328.89												1416	824.583	11.8958		1485	41.1316	1160.05			1560	45067.8	3117.85		1808	973.667	198.056			1491	741.375	-1.75		1640	162.375	8290.72
	1582	864.25	660.5		1440	273.653	6264.06												1418	541.211	-20.1053		1486	-6.58088	711.978			1561	2821.9	179.315		1809	687.724	472.349			1492	3557.64	395.625		1641	538.625	6287.88
	1583	1567.25	512		1441	866.506	1889.72												1419	446.989	61.5114		1487	54.4231	5881.78			1562	4478.97	488.033		1810	886.265	412.088			1493	2993.76	925.326		1642	989.357	184.655
	1585	850.763	26.5		1442	745.468	22113												1420	0	0		1489	-20.7609	1034.71			1563	4279	151.842		1811	1597.05	193.632			1494	5580.11	299.66		1643	602.4	50.8
	1586	4562.44	2844.39		1443	1689.78	4546.74												1421	651.5	-3.04167		1490	-63.6875	1373.71			1564	2735.11	235.38		1813	925.78	29043.6			1495	497.539	498		1645	683.053	112.684
	1587	1248.35	124.81		1444	905.506	5574.21												1422	8.25	-6.3		1491	-44.5924	1444.36			1565	4862.24	169.309		1816	1925.21	2009.3			1496	17114.4	1355.93		1646	781.114	23771
	1588	2975.12	1977.67		1445	471.48	7645.24												1423	599.773	0.40625		1492	-61.125	4853.38			1567	4446.31	3658.81		1817	835.333	394.056			1497	1339.04	116.265		1647	1431.8	431.864
	1589	1691.46	6630.23		1446	839.35	2826.85												1424	792.59	-50.8264		1493	-41.1033	1577.1			1568	1870.12	303.375		1818	920.9	2755.5			1498	1570.74	16.4107		1648	1081.28	37898.4
	1590	476.71	18695.2		1447	1829.3	7029.44												1425	812.912	38.6471		1494	-88.4211	2878.57			1569	12159.6	795.611		1820	780.583	-17.2083			1499	853.263	115.684		1649	1306.24	960.011
	1591	674.205	16495.3		1449	871.677	3005.45												1426	-7.275	-6.6875		1495	41.8289	903.737			1570	1310.83	48.875		1821	1718.2	606.158			1500	656.574	-49.9044		1650	582.053	825.263
	1592	4225.92	1902.09		1450	4291.89	8070.03												1427	0	0		1496	-71.6513	1293.34			1571	1995.36	135.476		1822	4726.24	825.217			1501	2249.95	544.441		1651	821.967	1259.7
	1593	956.632	330		1451	2537.96	11742.5												1428	433.425	-11.15		1497	26.0329	1022.51			1572	649.294	25.8824		1823	7100.2	1097.62			1502	10997.8	1536.01		1652	1028.69	1383.75
	1595	720.098	748.114		1452	497.233	1627.4												1429	825.176	22.0662		1498	844	4.75			1573	12043.4	718.411		1824	2007.17	878.13			1503	8274.87	268.015		1653	985.328	10778.7
	1596	995.781	107.875		1453	1509.47	8223.91												1430	1169.25	8.375		1499	-42.6842	2336.74			1575	1025.4	34		1825	1008.45	327.388			1504	7097.05	390.944		1654	1409.47	397.842
	1597	161.281	15594.9		1456	3732	43472.1												1431	980	-2.39706		1500	-60.625	4655.42			1576	1798.54	72.4718		1826	2785.03	683.917			1505	9004.92	764.458		1655	3244.75	1212.25
	1600	2163.95	357.918		1457	1846.7	5394.5												1433	408.918	-2.1		1501	572.485	116.309			1577	1008.93	98.5		1827	444.625	93.4375			1506	724.055	81.1562		1656	185.007	5980.31
	1601	1179.66	655.975		1458	2047.07	6136.76												1434	840.321	14.2857		1502	1401.1	72.2368			1578	3722.19	138.763		1829	2476.03	614.199			1507	4033.84	1080.97		1657	6544.09	2929.15
	1602	3308.55	1769.71		1459	913.558	12129.1												1435	20.413	3		1503	-72.0789	1298.55			1579	7366.05	321.053		1830	1197.91	161.434			1508	56.2604	6457.58		1658	2380.06	3218.04
	1603	3308.25	1139.25		1460	1737.31	5018.08												1436	1133.67	20.4375		1504	-51.3684	850.237			1580	1285.06	60.5515		1831	5419.07	9417.27			1509	606.566	-2.64		1659	272.319	535.75
	1605	666.091	151.727		1461	1551.57	32460.1												1437	677.714	22.125		1505	-298.096	9952.3			1581	1397.9	-9.19531		1832	14655.9	6974.3			1510	1476.86	123.633		1660	1867.56	4382.08
	1606	3880.37	1090.38		1462	1606.09	4814.14												1439	979.264	-4.68056		1506	12.1196	1186.39			1582	734.895	-6.10526		1834	822.538	1945.66			1511	5555.33	372.105		1662	512	2581.26
	1607	4272.31	1529.72		1464	753.908	5256.2												1440	756.059	-27.5921		1507	-1.4375	770.972			1583	1545.11	95.4167		1835	5491.12	770			1512	1098.33	270.458		1663	1472.16	954.401
	1608	3293.5	3507.72		1465	223.509	15132.5												1441	6.4	-7.35		1508	238.431	288.153			1584	6575.65	406.45		1837	2341.45	243.553			1514	2760.91	331.126		1664	867.812	101.111
	1609	652.571	34953.1		1466	2977.68	41614.2												1442	20.2	-27.425		1509	20.3553	1313.95			1585	1081.66	-71.7059		1838	978.824	98.7353			1515	4843.99	522.141		1666	813.362	1029.51
	1610	5040.36	2705.86		1467	1811.91	20169.1												1443	729.649	-136.075		1510	2261.11	15.2368			1587	1309.47	9.39375		1839	1265.98	89.6838			1516	4193.5	195.625		1670	769.125	235.452
	1612	1591.9	652.6		1468	1687.04	10353.8												1444	241.6	30.2		1511	10.9457	723.5			1588	1114.58	93.25		1840	700.211	-28.8359			1517	2166.33	2845.67		1671	732.672	253.984
	1613	1293.38	168.709		1470	1554.92	6224.97												1445	99.2235	3.63636		1512	13.3816	490.974			1589	853.794	75.3824		1842	9178.41	2758.26			1518	1078.38	20.4145		1672	1108.83	458.188
	1614	496.782	7230.39		1471	232.4	5255.64												1446	-0.075	-70.475		1513	1911.96	31.7917			1590	6702.55	398.947		1843	1222.04	168.375			1519	1571.77	57.7321		1673	880.897	71
	1615	373.621	6075.54		1472	2053.37	52069.3												1447	580.667	25.625		1514	1198.33	114.375			1591	1265.58	62.2708		1844	959.625	1645.8			1520	2844.74	289.171		1674	927.395	694.6
	1616	3497.93	620.429		1473	1778.91	9197.6												1448	86.6	5.475		1515	1878	67.2222			1592	1436.6	81.6176		1845	1649.48	244.659			1521	3751.8	1053.55		1675	491.648	7691.67
	1617	797.717	154.908		1474	2332.87	21491.3												1449	1.3875	-21.7125		1516	-126.865	5696.83			1593	1295.11	149.684		1846	614.417	214.042			1523	1298.83	120.6		1676	1170.3	432.586
	1618	-22.5714	12841.8		1475	2049.99	9057.51												1450	704.934	2.9375		1517	-25.0658	857.954			1594	905.898	18.9062		1847	2444.38	387.947			1524	1091.5	276.917		1677	1446.36	16496.6
	1621	939.833	-74.8333		1476	466.471	24889.2												1451	-31.25	-9		1518	-53.2222	1511.24			1595	1545.59	-72.125		1848	160.64	6544.04			1526	675.742	-91.4922		1680	1174	9623
	1623	3319.68	911.78		1477	280.423	24282.1												1452	1105.09	-17.6053		1519	-14.0486	782.958			1596	3975.62	227.375		1849	1395.47	1532.2			1527	693.236	-93.6667		1681	612.889	371.056
	1624	5149.84	6410.13		1479	3782.21	32856.9												1453	1149.91	-105.633		1520	-2.48684	647.25			1597	1863.38	103.375		1850	6712.9	1778.36			1528	2039.43	5.79167		1682	1430.18	557.86
	1625	1033.43	359.33		1480	1646.74	8701.14												1454	1483.89	-105.237		1521	18	2931.36			1598	1069.41	99.1974		1851	6656.11	1124.93			1529	1127.47	268		1683	1762.01	987.759
	1626	2304.42	61933		1481	2612.64	5610.91												1455	1652.52	4.64286		1522	30.3804	1557.29			1599	977.8	49.4		1853	944.765	124.846			1530	5155.09	328.795		1689	1282.4	595.083
	1628	1156.2	1987.08		1482	768.616	5003.03												1456	39.0435	2.15217		1523	133.375	1657.03			1600	6902.2	346.447		1855	2166	196.211			1531	1646.16	83.6579		1690	1133.98	385.206
	1629	2191.9	648.362		1484	1118.45	47506.3												1457	49.7455	-2.51786		1524	542.638	-14.2829			1601	1145.65	72.2941		1856	1084.11	169.303			1533	3658.1	191.11		1691	683.934	243.553
	1630	1685.5	281.656		1485	3296.96	44899.5												1458	1189.07	5.25		1525	6.01705	711.29			1602	1364.75	-2.09211		1857	9006.23	1317.31			1534	6413.77	2241.66		1692	575.243	107.706
	1631	2174.29	1345.03		1486	1901.66	7501.86												1459	36.0789	12.7368		1526	-84.5132	2410.46			1603	2416.44	167.336		1858	601.184	60.3421			1536	4130.95	304.524		1693	627.198	20011.8
	1632	1405.7	419.44		1487	990.25	2936.36												1461	11.9545	4.97727		1527	-42.6316	1078.7			1605	1312.04	112.775		1860	1392.61	277.089			1537	6671.65	216.481		1699	1791.88	1102.93
	1634	1082.75	278.75		1488	1649.08	6464.61												1462	835.235	-27.6471		1529	-138.952	3315.06			1606	2443.75	149.146		1861	1832.99	573.113			1538	6041.4	168.92		1700	1572.88	382.812
	1635	2230.86	551.636		1489	381.5	9599.63												1463	787.889	-11.8889		1531	65.0263	966.895			1607	6052.65	478.058		1862	882.336	135.204			1539	780.675	-49.9562		1701	1137.85	7362.49
	1636	1291.23	731.615		1490	2133.72	83700.5												1464	618.562	22.5391		1532	-24.7632	615.145			1608	509.849	275.296		1865	4263.48	558.12			1540	3213.98	269.667		1702	660.645	163.4
	1637	1219.09	3841.36		1492	623.6	2937.97												1465	1427.41	87.8125		1534	89.3478	1361.65			1609	2835.38	52.3553		1866	3068.18	1370.94			1541	722.375	138.555		1703	1223.74	477.54
	1638	2053.26	20697.5		1493	3113.75	13751.2												1466	94.7955	-18.5809		1535	-15.5192	9783.55			1610	900.625	34.375		1867	5787.22	19333.5			1543	13582.9	816.01		1704	1275.48	6085.56
	1639	1443.43	757.37		1494	1940.12	6235.25												1468	0	0		1536	-28.8289	632.566			1611	3555.35	11796.1		1868	3664	3405.16			1544	198.525	6.2		1705	2651.76	1049.4
	1640	538.944	13930.2		1495	1338.74	8743.5												1469	519.677	21.925		1537	-37.8553	1021.2			1612	2984.16	66.1034		1869	487.821	21656.6			1545	971.813	96.0417		1706	249.984	5102.86
	1643	1321.8	7.66071		1497	179.611	11763.6												1470	285.962	8.6125		1538	154.474	827.408			1613	1701.97	5510.89		1870	510.651	131.026			1546	795.106	81.1		1707	321.429	824.511
	1644	913.545	468.886		1498	2094.38	8931.33												1471	1212.66	169.908		1539	1612.5	63.25			1614	2805.39	6793.86		1871	2010.1	481.977			1547	2869.85	282.27		1709	497.882	120.145
	1647	618.921	307.441		1499	1527.44	2934.86												1473	1333.85	23.0294		1540	-28.337	2352.95			1615	744.528	6.16667		1872	3004.47	357.737			1548	8381.08	396		1710	488.25	230.853
	1648	1017.96	129.513		1500	680.775	1335.03												1474	1116.43	12.1184		1541	685.382	0.388158			1616	1194.46	63.475		1873	2249	462.911			1549	1419.22	-4.88194		1711	2231.49	1249.88
	1649	-9.3625	24409.3		1501	1180	4205.63												1475	895.956	31.3088		1543	697.556	50.3472			1617	1253.25	64.5		1874	8183.43	11836.7			1550	9008.14	533.06		1712	361.145	284.434
	1650	1087.36	26560.3		1502	880.306	11834												1476	589.909	-16.0909		1545	26.1447	1185.75			1619	1483.61	317.875		1875	1135.74	1688.47			1552	1118.97	198.868		1713	1464.32	411.684
	1651	4032.13	1834.75		1503	774.93	5344.89												1477	1223.77	4.95395		1546	-27.875	925.188			1620	1201.46	26.0417		1876	3927.75	6			1553	2071.68	162.421		1714	1357.1	1538.05
	1653	1971.29	743.615		1505	304.898	17630												1478	0.4	4.4		1547	12.8594	3285.74			1621	3283.72	126.889		1878	12705.6	2042.6			1554	1786.93	190.303		1717	334.64	15451.9
	1654	2128.17	350.889		1506	512.037	11872.4												1479	1267.99	34.0592		1548	-57.0909	1119.73			1622	4540.68	309.438		1879	1027.14	18066.5			1555	1776.05	17.6316		1718	6324.8	5124.06
	1655	1106.05	500.4		1507	215.036	9150.56												1480	1328.21	6.84211		1549	703.471	104.912			1623	5427.35	175.587		1880	10744.8	2811.67			1556	1383.71	-30		1719	2368.05	532.632
	1656	1864.34	279.437		1508	2630.2	40249.2												1482	12.9	0.556818		1550	586.328	50.9922			1624	1947.22	132.87		1881	1050.18	339.507			1557	7743.69	242.861		1722	155.29	5698.45
	1658	1092.97	12920.1		1509	1465.7	18625.7												1483	989.638	-20.7171		1551	216.647	366.412			1625	1407.21	36.5441		1882	9593.9	882.082			1558	13998.8	3274.4		1723	1047.58	251.417
	1659	2552.55	887.963		1510	1075.22	3696.75												1484	0	0		1552	-60.7632	975.789			1626	2889.45	292.724		1883	984.579	114.645			1559	1075.82	135.513		1724	1274.62	550.914
	1660	-370.274	9836.95		1511	425.214	21985.8												1485	1215.67	46.475		1553	-4.92763	1515.07			1627	847.974	9.41447		1884	3499.36	527.039			1560	907.125	-26.3309		1726	1023.9	2867.98
	1661	2316.62	350.342		1512	1052.69	2811.56												1486	26.1591	-3.3125		1554	1412.33	16.5556			1628	2605.34	24.1711		1885	1124.55	271.941			1561	2458.42	93.1053		1727	579.279	63.0147
	1663	1563.69	745.881		1513	1664.98	12893.8												1487	500.132	-20.7763		1555	-66.125	5405.64			1629	936.816	27.8158		1886	1680.29	843.474			1562	3082.26	331.132		1728	2279.72	1336.94
	1664	1339.66	45579.5		1514	2576.24	40401.9												1488	508.177	15.95		1556	-123.947	1391.16			1630	7024.62	461.667		1887	8754.86	1243.71			1563	836.6	162.55		1729	3102.46	858.717
	1666	626.45	72.8481		1515	1248.46	21234.2												1489	952.441	-12.9559		1558	2100.21	68.7895			1631	1786.46	71.6579		1888	72.3	50.2			1564	1860.03	120.434		1730	1773.12	1933.67
	1667	1546.5	34139.3		1517	1342.03	6106.94												1490	592.076	8.8		1559	-8.48684	1355.61			1632	1710.16	191.441		1890	958.706	103.559			1565	898.111	20.2222		1731	228.312	4915.25
	1668	676.475	397.494		1518	442.741	9221.96												1491	1139.63	20.3603		1560	1937.26	77.6912			1633	970.284	46.3088		1891	779.98	244.98			1566	77.12	5155.07		1733	994.5	646.125
	1669	2788.67	34703.1		1519	2385.16	5927.46												1492	250.854	28.5208		1561	1113.6	50.45			1634	19796.1	906.347		1892	428.212	19704.6			1567	962.369	-15.6726		1736	390.446	703.174
	1671	2790.07	619.621		1520	773.96	2994.55												1493	363.438	-17.6625		1562	-148	4464.38			1635	2851.91	207.772		1894	749.958	8999.17			1568	1462.51	7759.46		1738	8485.83	4746.75
	1673	2993.1	1599.24		1521	579.146	2277.34												1494	770.547	51.5		1563	-27.3684	774.237			1637	12001.7	640.076		1897	1760.51	297.119			1569	3211.94	236.438		1739	300.724	1875.66
	1674	878.67	192.779		1522	903.025	5403.38												1497	817.281	41.1062		1564	-115.231	4508.15			1638	4993.62	345.456		1898	622.828	61.9531			1570	661.875	110		1740	163.415	14545.5
	1676	1251.07	707.83		1523	1654.75	9837.31												1498	1153.36	37.9432		1565	-24.474	1232.56			1639	8378.25	449.355		1899	439.219	15179.9			1572	122.362	3.99265		1741	422.895	232.526
	1677	2085.61	522.161		1524	610.004	20094												1499	0	0		1566	2.23913	1073.28			1641	2416.61	135.54		1900	6058.75	1094.85			1573	1561.9	105.526		1742	2471.12	840.171
	1678	1238.38	488.844		1525	1134.78	26303.4												1500	1249.21	60.7083		1567	152.76	10630.9			1642	808.661	144.446		1901	1342.31	928.099			1574	875.429	213.667		1743	1792.84	3421.94
	1679	3873.82	601.868		1526	427.394	14811.1												1501	28.9286	-5.35714		1568	-45.1875	970.875			1643	156.128	6.73684		1902	877.917	535.667			1575	1084.9	21.3056		1744	428.219	23953
	1680	571.1	558.15		1527	404.673	64980.2												1502	21.8451	-10.6944		1569	24.0592	981.763			1644	1129.51	83.1974		1904	4463.79	601.714			1576	803.031	76.8203		1745	481.234	262.172
	1681	3540.77	1208.16		1528	1344.82	6826.22												1503	1110.83	32.4062		1570	-7.77632	1011.4			1645	3094.57	105.891		1905	1345.96	178.9			1577	810.736	79.6389		1747	1691.72	513.329
	1683	2827.76	102060		1529	793.713	15797.4												1504	443.579	19.1579		1571	12	1055.5			1646	1040.91	23.7059		1906	3866.25	505.219			1578	2377.22	54.3125		1748	277.51	5325.28
	1685	2233.94	768.32		1531	1707.78	10394.4												1505	426.75	31		1572	-51.5724	1796.2			1647	4630.81	219.401		1908	975.667	343.778			1579	1575.2	95.4934		1749	345.546	141.507
	1686	357.846	13688.5		1532	1123.06	4081.47												1506	1106.81	74.4853		1573	-26.125	1253.82			1648	11293.8	332.099		1909	585.816	249.243			1580	4371.3	218.059		1750	1287.43	606.043
	1687	359.472	648.401		1533	2865.93	108604												1507	87.4688	11.2969		1574	1102.94	155.824			1649	951.056	111.917		1910	1044.82	6.18421			1581	920.987	880.651		1751	888.25	3995.38
	1688	483.857	138.667		1535	411.679	23590.5												1508	594.921	18.4737		1576	-94.4022	2812.91			1650	4214.57	242.395		1912	909.636	56978.1			1582	784.656	129.281		1752	869.364	223.716
	1689	3328.06	445.875		1536	1959.07	8245.14												1509	900.336	-18.4609		1577	25.1053	1344.51			1651	1237.54	103.792		1913	4535.3	2098.39			1583	1059.25	37.5		1754	2875.5	997.375
	1690	2860.13	28296.7		1537	1699.24	6880.87												1510	24.55	-9.875		1578	2218.5	237.5			1652	1416.5	107.194		1914	1598.32	290.316			1585	788.474	404.158		1755	421	3834.75
	1691	1280.73	495.25		1538	691.188	2071.03												1511	1031.14	-8.08553		1580	978.444	173.528			1653	2028.23	987.342		1915	4309.79	4110.28			1586	8900	253.375		1756	157.632	7973.53
	1692	2702.02	1014.35		1539	1622.08	126157												1512	1246.05	21.2632		1581	-84.5	1956			1654	756.35	67.8625		1917	1179.5	337			1587	5206	517.017		1757	1428.57	-120.383
	1693	4718.24	2070.87		1540	4094.21	24565.7												1513	700.368	21.6471		1582	1005.27	372.909			1656	2376.1	131.663		1918	1116.93	155.369			1588	6136.47	733.688		1758	511.637	28391.8
	1694	946.238	1475.59		1541	575.636	7480.05												1514	10.1932	-1.06818		1583	1103.48	125.766			1657	105.778	2.38095		1920	12228.9	2417.12			1589	1886.13	-7.375		1760	739.309	40.4559
	1695	177.591	8727.09		1542	720.531	2146.29												1515	1042.52	-16.8162		1584	-54.3684	1743.35			1658	1020.83	40.9722		1921	8043.93	4227.96			1590	1730.33	193.952		1761	588.667	4295.45
	1697	1831.04	175.089		1543	388.875	9745.4												1516	1037.03	-4.08553		1585	1081.46	57.8125			1659	4175.75	228.783		1922	1301.44	267.389			1591	998.521	117.625		1763	1638.75	392.797
	1698	2070.15	1128.07		1544	2457.33	9680.67												1517	55.8162	-0.604167		1586	3177.49	368.375			1660	1632.16	11.3684		1923	1736.78	265.221			1592	2181.64	794.23		1764	691	25712.2
	1699	2314.96	594.723		1545	916.471	6468.88												1519	1275.34	33.2353		1587	15.6912	777.309			1661	8173.3	867.2		1924	2315.55	215.835			1594	1555.4	-115.595		1765	1003.88	442.5
	1701	1676.8	991.57		1546	802.08	4767.2												1522	700.127	50.3088		1588	713.097	55.3611			1663	1000.42	211.306		1925	15441.3	1924.62			1595	2475.27	409.545		1766	3999.22	924.022
	1702	713.941	190.125		1547	1249.65	3654.62												1524	0	0		1589	6.34211	613.605			1664	1087.92	15.6118		1927	4152.74	1322.63			1596	5423.75	210.1		1767	571.5	221
	1703	2495.89	244.076		1548	728.548	6139.84												1525	960.603	28.6579		1590	-30.3882	1067.74			1665	750.763	20.5526		1928	2653.53	285.21			1597	1148.69	124.5		1768	4291.25	1811
	1704	1051.9	183.193		1549	1846.52	41686.2												1526	767.25	38.25		1591	569.5	350.75			1666	363	34		1931	1167.38	1834			1598	1953.22	112.921		1769	692.25	3229.82
	1705	3262.5	745.212		1550	2395.64	17549.5												1527	438.38	-34.7434		1592	-82.9605	2134.25			1667	1276.09	140.691		1932	711.864	808.701			1600	5577.97	362.579		1770	458.342	1526.07
	1706	1174.69	219.059		1551	918.2	4932												1528	43.4	-6.13043		1593	11.5789	640.947			1668	1335.36	54.0062		1933	2844.4	2993.09			1601	467.375	174		1771	2153.76	289.74
	1707	912.069	5295.51		1552	685.854	25690.7												1529	1102.41	23.8824		1594	-77.0625	1064.38			1669	1413.86	23.4934		1934	9250.92	1102.15			1602	561.597	28552.7		1772	472.699	95.125
	1708	1060.94	541.537		1553	1144.67	1430.61												1530	2163.17	67.7763		1595	693.625	38			1670	1007.04	87.975		1935	3233	431.136			1603	1560.62	133.187		1773	83.569	11813.5
	1709	499.204	6213.31		1554	655.55	3337.6												1531	339.6	-38.8		1596	9.98684	783.842			1671	962.625	56.5		1936	537	3.22222			1604	2515.5	128.5		1775	829.237	182.637
	1710	2577.23	858.085		1556	433	5836.09												1532	43.4886	-5.79545		1597	-82.3542	2146.35			1672	1384.14	1925.08		1937	949.842	27994.7			1605	1407.36	143.836		1776	1261.84	1457.53
	1711	596.107	232.875		1557	571.35	1750.36												1533	1096.5	42.375		1599	-12.2368	925.809			1673	535.804	480.962		1938	631.12	4290.96			1607	1594.68	65.1786		1777	329.646	86.6875
	1712	356.663	201.831		1558	1749.78	9133.64												1534	413.506	7.9375		1600	-174.92	5271.42			1674	2527.53	250.507		1939	723.385	6342.6			1608	211.329	10654.2		1778	472.769	8935.9
	1713	4077.52	1425.55		1559	989.486	4679.51												1535	556.25	-31.25		1601	3.78947	847.105			1675	898.474	191.395		1940	1060.29	159			1610	5948.05	1797.71		1779	484.211	150.117
	1714	4458.89	1918.37		1560	2461.8	7764.06												1536	-0.863636	0.954545		1603	384.424	66.0625			1676	2252.06	64.1597		1944	904.282	24398.3			1611	913.766	72.1875		1781	160.145	4710.97
	1715	2858.64	612.728		1561	711.318	63717.3												1537	9.925	15.7625		1604	24	932.237			1678	1806.59	388.5		1945	3019.4	3553.4			1613	1169.62	28670.7		1782	2449.74	501.821
	1716	1436.03	602.606		1562	2055.64	11428.6												1538	-2.41026	-2.0625		1605	791.941	-10.1176			1679	2096	500.667		1946	890.789	81.8816			1614	1251.29	85.9286		1783	1385.83	294.237
	1717	4600.81	1507.5		1563	871.406	64870.2												1539	1207.37	105.042		1606	-173.513	2919.32			1681	1101.91	100.147		1947	2260.19	32.4722			1615	476.288	9126.27		1784	751.125	244.844
	1718	2849.81	361.333		1564	625.9	4372.1												1540	820.579	22.0263		1607	4818.93	627.388			1682	916.172	41.4062		1949	307.633	11341			1616	3050.72	199.506		1785	2352.57	1199.74
	1720	2602.14	449.477		1565	1085.12	3209.96												1541	374.3	-11.0375		1608	30.89	4282.04			1685	2359.28	84.0855		1950	385.265	780.978			1617	2097.33	121.333		1786	1027.8	120.6
	1721	1060.34	1496.11		1566	1743.39	43879.3												1542	334.549	16.5769		1609	-78.3194	1163.92			1686	817.2	138.85		1951	8769.23	1567			1618	3293.51	818.635		1787	638.053	513.158
	1723	1267.48	626.547		1567	519.884	6414.84												1543	931.606	27.0461		1610	1369.97	203			1688	2566.03	100.646		1952	413.528	15796.3			1619	1303.58	226.321		1788	124.48	5788.5
	1724	938.832	717.239		1568	148.2	7132.29												1544	2.45455	2.45455		1611	-30.1304	1063.53			1689	501.485	94.0074		1953	1042.36	197.844			1620	1484.03	200.724		1789	1098.67	181.69
	1725	918.575	261.55		1569	463.708	28543.3												1545	907.375	-0.875		1612	42.8404	7.10417			1690	1081.13	543.579		1954	2020.34	431.403			1621	673.421	3510.89		1791	112.078	7619.22
	1726	115.903	-40.1875		1570	1378.16	25144.3												1546	1657.93	-57.6964		1613	999.257	71.1645			1691	1774.03	116.151		1955	2346.2	-24.3487			1622	438.824	33772.4		1792	771.147	226.721
	1727	1188.17	400.417		1571	3387.44	16504.5												1547	1441.89	8.44565		1614	618.35	32.0188			1693	829.145	14413.4		1958	1032.11	168.202			1623	1872.94	95.0625		1793	500.734	9890.77
	1728	1733.09	331.375		1573	1570.19	11144.9												1548	622.632	33.4097		1615	666.941	15.5882			1694	598.033	208.204		1959	1066.5	121.25			1624	1588.57	159		1794	550.25	205
	1729	3269.92	12584		1574	1485.84	3247.67												1549	95.9189	0.210526		1616	-21.2368	1293.45			1695	2234.66	161.684		1960	4473.38	672.679			1625	1028.21	315.181		1795	716.111	31140.1
	1730	1252.35	194.845		1575	1206.58	5708.9												1550	1417.65	-18.6711		1617	995.895	32.3684			1696	1409.06	161.191		1961	10761.5	1485.43			1626	4392.67	2318.64		1798	1287.47	1055.48
	1731	522.329	117.783		1576	430.699	19436.8												1551	2476.15	105.958		1618	1173.83	418.441			1697	7257.2	260.955		1962	1430.79	292.429			1627	1209.96	90.6544		1799	444.875	213.953
	1732	3664.55	877.727		1577	648.944	1992.72												1552	1112.16	87.3947		1619	749.079	100.632			1698	846.292	42.9583		1964	1936.2	1047			1628	1211.66	241.737		1800	2192.65	1990.59
	1733	4871.66	3694.56		1578	680.01	3819.81												1553	206.953	11.9565		1620	-43.4886	1901.5			1700	18018	1019.81		1966	778.278	102.986			1630	1375.97	151.151		1801	3172.89	796.033
	1734	1796.96	2700.52		1579	1434.5	5273.14												1554	15.3438	-1.30208		1621	5.25	1294.78			1701	16653.5	10480.7		1968	422.168	1363.29			1631	795.216	5673.59		1802	503.679	133.268
	1736	1825.16	300		1580	353.115	10599.3												1555	-17.3314	-15.9489		1622	-2.32212	3174.21			1702	1309.87	133.526		1971	1830.64	388.772			1632	6328.15	281.844		1803	824.037	230.096
	1737	3602.8	1785.08		1582	3866	13424.2												1556	1071.8	43.6842		1623	2088.2	167.73			1703	4690.62	360.5		1972	892.553	195.868			1633	1599.85	118.118		1804	249.52	18978.8
	1738	2574.06	961.655		1583	2483.28	32603.3												1557	2264.51	-77.85		1624	-79.4896	2362.54			1704	652.434	668		1973	2212.61	661.585			1634	2014.61	266.895		1805	964.421	358.737
	1739	2574.22	83623.3		1584	771.565	25526.6												1558	126.075	-24.975		1626	-46.25	2350.75			1705	849.972	47.9236		1974	4633.53	775.454			1635	2241.66	87.2763		1806	992.779	563.338
	1740	320.01	11939.8		1585	4397.09	22329.2												1559	50.8571	7.67045		1627	48.0987	1160.09			1706	9200.73	430.977		1975	14783.6	2792.03			1636	1360.31	105.688		1807	1278.64	5283.09
	1741	320.48	7772.17		1586	662.952	4185.66												1560	798.167	16.3092		1628	-312.815	8765.59			1707	2475.62	128.483		1978	1515.43	101.331			1637	1391.96	-40.6471		1808	679.221	30.3824
	1742	4134.96	725.135		1587	548.125	2497.52												1561	1014.02	49.625		1629	-43.9079	1771.25			1708	1275.91	114.268		1979	879.108	114.841			1638	4086.22	506.783		1809	965.579	1801.33
	1743	1564	142		1588	446.493	23568.5												1562	1073.06	22.5938		1630	36.7283	868.424			1709	4723.58	322.391		1980	1678.08	2273.2			1639	797.775	623.181		1810	5572.74	6601.2
	1745	573.419	71.7279		1589	2993.92	11559.9												1563	119.263	-11.5625		1631	22.3553	1333.61			1710	1776.37	970.836		1981	955.759	32100.7			1640	2512.08	3540.08		1812	1197.92	755.342
	1746	599.526	207.237		1590	680.775	3953.19												1564	906.895	45.0526		1632	-59.1447	2383.22			1711	4372.25	154.572		1983	629.138	45554.1			1641	2082.5	207.105		1814	394.329	7417.98
	1747	49.0885	6808.32		1591	610.3	4236.88												1565	25.8382	-56.8971		1633	833.638	521.888			1712	2379.93	309.974		1984	1386.51	271.909			1642	1070.29	21.403		1815	3810.75	4181.95
	1749	1000.36	474.353		1592	1447.25	8736.65												1566	745.012	84.975		1634	15.8478	629.761			1713	1368.4	-41.2083		1986	1496	219.112			1643	10893.6	2024.48		1816	711.424	249.042
	1750	2243.57	582.916		1593	946.875	4101.62												1567	4.06579	-5.65341		1635	985.421	449			1715	12503.6	602.644		1987	2103.68	477.375			1647	633.706	106.051		1817	512.292	492.264
	1751	2871.65	453.131		1594	722.632	2274.3												1568	0	0		1636	-48.4444	1548.19			1716	1654.17	79.0903		1988	1751.63	1906			1648	3726.34	140.59		1818	1045.26	562.444
	1752	2588.39	681.205		1595	687.231	7053.77												1569	520.938	45.2812		1637	-17.8947	737.757			1717	3718.17	216.118		1989	2121.15	62.55			1649	1094.75	82.25		1819	1485.16	1044.79
	1753	2417.68	962.16		1596	2516.29	8509.88												1570	1232.68	-13.8631		1638	638.059	65.7059			1718	2239.99	145.411		1990	1082.28	85.8187			1650	10371.9	596.792		1820	1869.29	1908.71
	1754	525.714	64.1429		1597	4738.34	16915.4												1571	50.5556	3.2		1639	-58.5652	1666.91			1719	1267.75	135.25		1991	3326.59	349.898			1651	20823.1	1792.21		1822	417.401	767.138
	1755	763.105	342.053		1598	1247.9	5282												1572	1076.59	26.6908		1640	-41.88	2534.8			1720	646.153	42.4514		1992	2054.08	89.4737			1652	9091.46	2459.96		1823	1677.36	920.5
	1756	732.404	15391.9		1599	457.075	1041.03												1573	217.167	-49.3214		1641	-24.4674	1485.7			1721	8826.15	1988.13		1993	1909.51	449.631			1653	908.853	495.147		1824	1359.87	823.864
	1757	2182.93	333		1600	1499.46	5595.69												1574	1023	-45.375		1642	684.081	75.3375			1722	1837.84	154.648		1994	4774.62	1105.29			1654	16654.2	1236.8		1825	8774.87	3038.77
	1758	1257.7	332.468		1601	872.162	8112.82												1575	789.487	8.00658		1645	-116.975	4480.7			1723	3496.36	212.455		1995	328.495	9145.77			1655	39.1818	110.688		1826	233.519	8888.35
	1763	861.273	10944.3		1602	1466.22	3963.45												1576	1345.31	-36.0735		1647	260.402	5109.16			1724	1378.69	110.333		1996	587.638	261.775			1656	989.485	54.1493		1827	890.407	13880.6
	1764	685.625	561.75		1603	417.485	19528.4												1577	1284.12	9.08824		1648	1476.5	90.5132			1725	7985.25	191.922		1997	1861.82	206.523			1657	570.514	81.9097		1829	1720.21	707.667
	1765	1151.27	808.058		1604	467.125	19188.2												1578	1773.17	87.2391		1649	-15.0909	867.091			1726	3532.42	2441.98		1998	780.169	96			1658	2140.34	898.604		1830	159.803	7071.22
	1766	1519.55	157.825		1605	2051.5	7044.72												1579	1044.93	-23.5132		1650	1920.04	243.913			1728	2329.7	1142.55		2001	1695.81	218.676			1660	1078.22	199.906		1831	2011.35	3387.3
	1767	1008.91	370.818		1606	600.58	22599.1												1580	564.242	67.6641		1651	-29.0909	843.364			1729	1165.88	24.8819		2002	811.184	180.013			1661	11922	2846.84		1832	367.727	832.818
	1768	4218.96	2163.04		1607	1930.58	22388.8												1581	884.204	47.3487		1652	1043.03	141.833			1730	686.578	-38.4688		2003	4189.04	954.688			1662	892.684	-9.89474		1833	6200.41	2523.22
	1769	1101.04	253.903		1608	1763.68	24408.9												1582	979.738	29.3512		1653	1254.71	36.2647			1731	3897.57	536.146		2004	3218.08	480.289			1663	1325.35	124.153		1835	1371.83	287.625
	1770	2257.7	659.812		1609	821.284	3389.61												1583	978.725	43.35		1654	-58.4474	1652.96			1732	1399.67	137.778		2005	542.167	8.94444			1664	2280.45	361.435		1836	2713.26	2201.72
	1771	1841.41	2343.46		1610	457.946	23490.8												1584	491.148	31.8281		1655	-6.66447	1079.34			1733	1845.53	172.912		2007	1062.66	202.688			1665	813.978	159.191		1839	888.5	525.7
	1772	2048.25	611.75		1611	1051.35	7701.77												1585	137.85	5.7		1656	72.9539	1043.34			1734	1166.59	144.661		2008	1864.06	442.382			1666	2160.86	163.929		1841	2641.09	251.763
	1773	960.141	218.902		1612	901.179	19316.9												1586	1944.94	17.4318		1657	556.914	16.8516			1735	1657.71	3625.76		2011	4851	4802.5			1668	1549.95	305.513		1842	1660.5	3240
	1774	465.25	2512.12		1613	550.318	23252.4												1587	1603.91	17.1172		1659	-26.5625	1029.25			1736	11454.8	638.23		2012	1098.68	171.5			1669	3130.33	195.201		1843	841.35	231.9
	1775	315.742	21697.5		1614	1938.93	22583.6												1588	716.097	-10.9306		1660	-100.667	2914.96			1738	7229.55	219.865		2015	2015.38	137.342			1670	530	214.5		1845	2196.42	673.943
	1776	2367.1	40370.5		1615	352.99	11179.5												1590	2633.08	65.9737		1661	-61.2976	1198.92			1739	1469.43	94.0461		2016	882.826	1276.75			1671	7188.3	366.253		1846	1779.65	202.051
	1777	1821.12	642.688		1616	509.948	1757.85												1591	89.1948	31.2562		1662	2294.58	114.049			1740	2842.26	217.75		2018	1340.26	367.816			1672	3178.99	183.618		1848	741.553	396.553
	1778	1358.56	439.875		1617	590.204	12229.6												1592	632.046	-19.0658		1663	-121.39	1782.46			1741	2188.77	156.724		2020	1142.92	198.956			1673	4459.94	363.188		1850	3912.67	1435.5
	1779	1100.75	693.875		1618	594.35	2145.42												1593	1001.53	-42.0588		1665	2.56818	805.727			1742	1706.91	5.86111		2021	1150.91	95.5592			1675	5533.37	271.82		1851	419.125	405.25
	1780	514.75	505.625		1619	1911.23	8993.1												1594	67.5086	-6.04688		1666	1659.18	236.895			1743	1341.17	132.633		2024	1786.78	196.329			1676	1374.38	572.237		1852	719.534	428.807
	1781	1628.47	334.162		1620	3054.22	16395.6												1595	1125.08	-78.2353		1667	-17.95	1172.75			1744	3452.64	204.312		2025	3968.54	947.88			1677	2105.19	764.562		1853	498.771	928.292
	1782	253.71	4137.86		1621	5260.93	14495.8												1596	296.615	-6.4		1668	-55.8804	1897.15			1745	1047.23	27943.6		2026	2276.49	409.724			1678	1080.11	-285.211		1854	282.918	1624.99
	1783	1070.78	1744.03		1622	1169.46	7391.76												1597	47.8478	-13.6739		1669	1688.15	25.9375			1746	1107.86	-89.1875		2028	2315.19	323.458			1679	7538.97	523.184		1855	480.292	182.536
	1784	2321.34	438.722		1623	354.164	12574.2												1598	6792.91	109.24		1670	1191.47	136.713			1747	883.82	10479.7		2029	3754.36	2368.8			1680	1226.5	99.75		1856	386.551	17621.4
	1786	1120.87	610.228		1624	1847.18	28595.3												1599	1487	13.1111		1671	-12	662			1749	6714.14	447.257		2030	901.72	113.881			1681	9721.23	391.322		1860	2384.91	711.086
	1787	3021.85	4137.37		1625	628.763	1693.65												1600	566.836	12.0197		1672	953.562	74.8333			1750	527.635	2220.72		2031	1168.43	4225.11			1682	727.618	21.3077		1861	3381.98	2585.76
	1788	3116.13	1871.59		1626	922.417	2594.02												1601	1.57692	-2.1875		1673	31.3421	1043.12			1751	1483.75	191.5		2032	3941.18	3913.33			1683	1118.03	38.6875		1862	1838.61	2243.64
	1790	1447.42	852.525		1627	1642.44	11856.1												1602	-145	2530.37		1674	1504.43	176.579			1753	1557.98	4.55921		2033	9817.71	1231.18			1684	2732.74	1138.58		1863	423.455	682.46
	1791	2603.7	822.5		1629	1009.8	3437.89												1603	640.973	56.8		1675	14.6184	1146.31			1754	10335.2	414.715		2034	3508.64	460.667			1686	11113.3	564.467		1864	276.203	5742.69
	1792	1717.29	411.594		1631	2883.33	16858.6												1604	386.054	27.55		1676	4648.31	470.317			1755	3295.42	193.566		2035	481.222	587.604			1688	4893.06	574.438		1865	2204.58	1176.11
	1793	2168.49	2617.22		1632	435.89	2700.11												1605	1133.45	-4.07812		1677	-29.2206	1205.57			1756	12966.7	377.728		2036	11469.4	1784.06			1690	984.658	203.368		1867	1109.82	490.987
	1794	2169.45	374		1633	526.75	10807.8												1606	1034.83	13.5833		1678	-69.25	4034.04			1757	708.138	60.0855		2038	1301.66	827.542			1692	1327.65	108.588		1868	961.727	355.977
	1795	609.045	59.5341		1634	992.75	7661.55												1607	30.6667	-0.861111		1679	-88.9079	1274.7			1758	2656.97	148.829		2039	3293.22	268.389			1693	1179.4	-39.7891		1869	446.944	125
	1796	665.425	187.237		1635	162.054	11399.5												1608	23055.6	292.889		1680	-106.805	6466.49			1759	1269.38	133.625		2040	1018	12465.2			1694	247.765	26140.9		1870	535.931	376.118
	1797	742.461	182.566		1636	1095.56	10458.3												1609	2269	-3		1681	-14.4934	1202.91			1760	2820.84	213.947		2041	13648.4	1863.62			1695	915	308.5		1871	746.75	82.7083
	1798	3469.79	4630.61		1637	1421.87	15783.2												1610	1606.33	90.7656		1682	-35.1042	1303.15			1763	2666.17	177.119		2042	1792.1	7424.2			1696	2015.71	33.8542		1872	745.842	617.533
	1799	1951.01	802.862		1638	802.5	6160												1611	966.688	84.2813		1683	-153.68	2526.36			1764	6755.92	289.729		2044	838.725	1599.91			1697	4648.65	391.971		1873	514.206	508.537
	1800	3810.48	2336.5		1639	1509.13	7978.93												1612	555.904	161.434		1684	-85.81	2590.33			1765	1509.79	33.7632		2045	934.262	436.881			1698	788.441	20.8		1874	985.02	577.678
	1801	551.875	558.625		1640	1497.18	4796.38												1613	1022.05	12.9559		1685	-127.822	3133.32			1766	889.895	52.2105		2046	1162.81	115.897			1699	3976.36	99.2368		1875	2054.12	807.914
	1802	3408.2	90480.5		1641	2328.04	24680.4												1614	653.875	-16.3125		1686	-40.0761	1734.95			1767	1322.46	184.222		2047	1281.21	10926.9			1700	7643.9	844.212		1877	1215.05	234.578
	1803	3987.67	1499.21		1642	129.787	7964.32												1615	654.8	70.4		1687	9.38816	1667.78			1768	1277.51	43.0855		2048	13523.6	1933.72			1701	1618.53	219.75		1880	733.306	626.194
	1804	656.171	287.632		1644	724.125	1470.56												1616	882.542	7.96528		1688	-223	4725.25			1769	1579.17	98.8409		2049	10630.1	180.14			1702	12555.1	1923.59		1881	3084.7	1538.51
	1806	2523.7	629.522		1645	2230.24	12648.6												1617	40.9257	2.21053		1689	576.5	334.625			1770	1887.31	351.063		2050	2625.3	149.336			1703	650.434	166.276		1882	320.944	23821.9
	1807	3448.49	1848.85		1646	831.536	15501.6												1618	1138.64	54.7353		1690	1049.25	43.6447			1771	4641.35	580.337		2051	473.766	3761.61			1704	10224	634.883		1883	103.007	8247.24
	1808	2065.19	454.75		1647	1610.5	9953.16												1619	93.5294	17.5882		1691	1594.75	97			1772	22170.5	3621.75		2052	2556.77	281.882			1705	39.85	-29.55		1890	2232.28	1002.13
	1809	3336.65	637.087		1648	1593.01	9453.6												1620	1142.53	-13.4474		1692	-105.792	1634.46			1774	6820.91	454		2053	1128.37	-50.8542			1708	462.375	-30.5		1891	929.735	263.493
	1810	2190.78	677.609		1649	1948.81	13678.8												1621	981.646	-8.64583		1693	919.39	89.2206			1775	2067.65	228.882		2054	2436.88	519.568			1709	7850.12	320.531		1892	2203.13	790.696
	1811	3065.16	6524.76		1650	1495	18892.8												1622	167.15	-13.05		1694	-38.2039	788.658			1776	984.688	28.25		2055	2800.65	4148.25			1710	5802.79	214.48		1893	690.176	467.588
	1812	1031.23	728.274		1651	483.42	3129.98												1623	1666.53	-18.8088		1695	-18.625	1809.12			1777	1546.3	137.182		2057	291	25374.6			1711	3402.59	249.36		1894	825.974	543.072
	1813	1712.02	359.886		1652	1619.4	4681.21												1624	457.719	36.4375		1696	-4.94737	786.474			1778	1715.67	422.763		2058	3883	480			1712	3389.47	377.796		1895	945.292	562.479
	1814	1305.39	732.462		1653	534.894	3478.46												1625	648.812	-19		1697	24.0163	2820.51			1779	1999.18	345.273		2059	1234.2	176.309			1713	12063.1	1167.98		1896	130.365	6444.94
	1815	3853.66	1961.16		1654	1263.41	27824.7												1626	1466.8	11.2		1698	28.375	1413.9			1780	621.891	48.5781		2061	994.053	172.211			1714	15868.5	1047.95		1900	2374.84	978.418
	1817	920.25	753.981		1655	1070.5	7216.23												1627	-118.425	-140.05		1699	-34.2574	970.721			1781	942.25	137.725		2062	2801.56	804.938			1715	1103.15	159.818		1901	808.868	746.191
	1819	1401.38	1006.56		1656	1074.12	7446.44												1628	1033	12		1700	-123.475	3931.32			1782	863.75	89.25		2064	994.049	300.188			1716	4511.78	1.16667		1902	1728.38	427.25
	1820	1933.11	832.135		1657	777.045	1620.67												1629	623.972	27.6458		1701	-211.5	11776.5			1783	1177.49	69.0921		2065	2404.54	362.809			1717	1667.34	632.722		1903	873.737	555.342
	1821	2498.32	706.909		1658	1396.48	8233.34												1630	757.083	9.97222		1702	88.3011	940.631			1784	10207	531.63		2067	8348.55	1258.22			1718	544.222	12762.5		1904	1255.62	494.875
	1822	1014.34	384.781		1659	1282.54	4572.95												1631	-14.4545	2.27273		1703	735.471	50.8824			1785	1286.12	98.1667		2068	763.506	399.864			1720	734.554	326.875		1905	478.312	186
	1825	2957.38	967.25		1660	675.896	1677.83												1632	1502.75	28.75		1704	918.303	301.053			1786	945.771	50.8472		2069	655.723	18691.4			1722	536.434	712.066		1906	263.224	3943.43
	1826	2182.09	425.6		1661	111.031	16311.4												1633	159.05	-11.25		1705	-12.4688	2809.75			1789	1072.86	90.6111		2070	1065.5	1382.2			1723	929.824	30.4338		1907	8011.68	21586.1
	1827	765.323	434.391		1662	650.987	63231.9												1634	687.882	100.493		1706	-73.875	1897.01			1790	1289.81	-8.39062		2072	1887.54	-55.8542			1724	635.044	60.95		1909	713.088	185.985
	1828	1498.25	502.776		1663	726.812	1896.1												1635	30.3929	-18.3571		1707	-121.615	3528.54			1791	1016.62	79.5312		2073	2125.82	265.273			1725	2167.84	95.5263		1910	948	1339.47
	1829	919.894	325.203		1664	32.0673	10492.7												1636	-5.7375	-29.1625		1708	-27.1111	811.111			1792	1578.88	156.824		2074	10234.5	1410			1726	17144.6	532.062		1911	1714.42	16184.9
	1830	2144.27	884.15		1665	579.885	7650.51												1637	443.156	42.9375		1709	38.7763	908.73			1793	6988.53	435.625		2075	478.728	20228.7			1727	3835.26	-286.604		1912	966.467	536.418
	1831	917.712	1184.88		1666	783.737	3260.8												1638	618.289	21.4375		1710	-69.0781	1685.92			1794	2306.23	236.604		2077	525.1	2606.45			1728	777.542	93.125		1913	4243.97	2045.48
	1832	1491.89	4086.68		1667	374.76	5283.09												1639	21.4	6.7		1711	-52.9737	2047.31			1795	5235.31	359.53		2079	1166.86	194.461			1729	3238.86	384.934		1915	705.783	236.605
	1833	4141.75	950.906		1668	1591.68	6232.21												1640	53.6333	15.2		1712	162.792	289.646			1796	3222.38	141.97		2080	1598.99	2251.94			1731	32700.2	2272.21		1916	456.606	19154.7
	1834	3534.75	1164.06		1669	3044.36	25387												1642	581.029	62.1176		1714	-19.7989	1691.07			1797	789.131	-33.4125		2082	1970.3	315.893			1732	1159.35	40.9444		1917	1298.09	8984.17
	1835	1651.35	62.35		1670	2977.3	57830.3												1643	33.1711	-5.82237		1715	490.888	20.5526			1798	5930.22	367.413		2083	481.855	527.408			1733	26083.8	2658.54		1918	434.559	231.853
	1837	416.289	155.224		1671	1038.56	5470.99												1644	1067.8	32.9545		1716	896.5	48.6437			1799	34773.4	3083.66		2084	1196.96	415.542			1734	694.25	176		1919	1219.45	27716.8
	1838	2062.05	530.875		1673	764.175	2972.57												1645	1559.47	7.625		1717	59.5066	930.046			1800	2467.88	216.697		2085	2377.75	67.7083			1735	993.318	211.159		1920	2335.16	709.4
	1839	676.672	10797.4		1674	1456	5455.39												1646	1494.9	21.8571		1718	-262.681	10982.2			1801	1163.88	234.75		2086	1963.23	278.595			1736	2367.7	739.7		1921	778.224	411.632
	1841	2808.91	354.295		1675	556.781	88534.7												1647	983.333	-37.0417		1719	-1	638			1803	1742.3	85.2895		2087	7271.94	1448.75			1737	5064.24	407.818		1922	441.757	552.533
	1842	1314.26	234.231		1676	1260.63	13692.6												1648	797.538	18.9375		1720	-17.5263	840.474			1804	908.719	14.6719		2088	505.25	69.75			1738	4928.51	823.583		1923	777.961	382.651
	1843	688.204	17174.5		1678	3013.18	11802												1649	116.72	-11.1731		1721	-60.8224	2511.38			1805	644.531	94.4531		2089	2310.61	3595.47			1739	2191.39	94.7778		1924	474.08	527.69
	1844	137.796	5040.85		1679	296.152	7168.76												1650	1196.58	-31.8158		1722	1057.97	117.853			1806	4981.13	1518.68		2090	420.099	8582.05			1740	1758.51	111.868		1925	727.222	569.296
	1846	312.038	4405.54		1680	804.411	13950.1												1651	683.545	22.9853		1723	1653.58	147.276			1807	2732.53	362.574		2091	6553.67	4797.98			1741	3547.93	679.77		1927	1542.78	350.264
	1848	1314.79	528.237		1681	638.563	17290.8												1652	651.188	6.86111		1724	-20.2353	552.147			1808	28170.1	1997		2092	1401.81	349.233			1743	767.711	21.2031		1928	1578.63	358.842
	1849	1759.67	589.667		1682	538	2104.62												1653	697	93.4706		1725	-47	786.812			1809	1093.65	16.4044		2094	2727.43	608.068			1744	1045	154.5		1929	539.974	795.638
	1850	2100.4	959.2		1683	3116.84	4067.19												1654	871.237	4.21711		1726	-14.5329	1503.14			1810	566.853	80.9118		2095	1133.57	243.645			1745	3022.12	2180.83		1930	265.705	10491.3
	1851	920.414	550.059		1684	697.212	36591.4												1655	43.4	5.15		1727	819.833	62.6667			1811	38948.8	3657.93		2096	2996.53	561.289			1746	1902.68	5.61957		1932	755.295	11048.4
	1852	1292.77	344.23		1685	1615.36	8478.33												1656	526.375	14.25		1728	2580.14	129.362			1812	2939.69	248.256		2098	831.556	23212.2			1747	1372.2	146.25		1933	1066.28	788
	1853	897.339	15406.6		1686	764.335	21005.3												1657	980.205	43.875		1729	-70.9167	4935.25			1813	774.931	78.3056		2100	1522.15	164.057			1748	1232.35	-12.6691		1935	342.566	7994.75
	1854	1523	646.375		1687	1292.65	4915.16												1658	385.475	-13.6375		1730	-50.5789	1598.05			1814	5438.07	290.487		2101	992.717	2659.41			1749	915.684	130.737		1936	1427.53	283.316
	1855	694.938	306.487		1688	764.271	2574.89												1659	770.25	33.5		1731	13.2829	2535.92			1815	10047.8	1868.35		2102	1356.08	791.289			1750	1005.53	-20.1842		1937	1172.05	1559.03
	1856	3388.16	1555.83		1689	1401	56013.4												1660	970.474	9.68421		1732	2299.37	44.0132			1816	1212.46	120.471		2103	636.132	207.395			1751	873.285	50.0208		1939	2308.61	-57.8889
	1857	981.332	304.745		1690	2981.38	64804.5												1661	972.633	-26.0875		1734	1509	74.2434			1818	1453.79	90.1691		2104	600.179	159.155			1752	1939.3	190.543		1940	76.8654	11208.4
	1859	1027.09	331.063		1691	1259.52	3447.98												1662	732.456	0.485294		1735	-34	1973.5			1819	484.028	9039.03		2105	5929.04	1125.41			1753	14791.6	1742.51		1942	2607.69	703.189
	1860	4548.37	1726.37		1692	955.056	7647.35												1663	529.211	51		1736	-62.7059	1043.5			1820	750.265	43.3824		2107	770.563	284.563			1754	16262.7	1279.14		1943	449.07	5927.72
	1861	955.556	158.097		1693	1441.02	7963.4												1664	0.775	-4.825		1737	803.25	86.75			1821	2665.73	139.605		2108	4591.95	2138.24			1755	1171.9	-19.6111		1944	375.361	7920.65
	1863	300.985	4826.49		1694	1469.8	2977.16												1665	553.906	-12.4063		1738	740.419	-74.2132			1822	3358.55	276.632		2109	588.194	15.025			1756	4108.05	336.316		1945	1166.48	449.116
	1864	773.263	241.25		1695	-100.596	14655.1												1666	584.971	32.25		1739	-80.7083	2959.65			1823	1050.91	154.969		2113	7293.14	984.515			1757	10648.8	1456.38		1947	2280.83	947
	1865	1531.1	395.756		1696	1489.57	24037.3												1667	27.3684	1.73684		1741	87.15	3596.73			1825	4643.84	438.76		2114	1873.62	2622.08			1758	2066.25	-69.625		1948	777.158	884.189
	1866	1145.57	435.08		1697	3906.34	13710.8												1668	507.25	97.6719		1742	5549.25	161.1			1826	877.125	5.36765		2115	7724.23	1452.38			1759	997.375	179.5		1949	1476.27	491.25
	1867	3173.05	909.939		1698	633.78	1152.9												1669	312.125	35		1743	1215.14	123.822			1827	4304.51	11524.4		2116	3687.32	544.803			1760	3026.76	106.849		1950	954.289	271.053
	1868	2811.04	797.194		1699	674.4	2120.29												1670	1825.5	-49.6471		1744	-62.0924	3113.87			1828	2543.24	70.0526		2117	2053.36	315.727			1761	1636.57	114.158		1951	3297.88	855.268
	1869	596.401	225.24		1700	328.745	5391.95												1671	2101.67	-44.75		1745	1615.89	141.447			1829	7157.02	640.92		2118	1016.96	214.214			1762	2845.5	320.768		1952	484.572	392.553
	1870	1433.2	395.543		1701	573.7	2829.25												1672	1644.82	18.1471		1746	-17.8553	941.5			1830	846.5	165.917		2119	5366.5	832.75			1763	266.816	487.227		1953	8454.49	6392.5
	1872	3311.23	430.395		1702	2629.39	13031.9												1673	2225.5	-62.6471		1747	1921.36	39.6316			1831	5725.04	493.447		2120	10150.1	2329.67			1764	1705.27	56.9444		1954	559.255	9383.92
	1873	993.5	259.5		1703	860.857	18019.4												1674	0	0		1748	10.8636	1027.8			1832	5818.17	560.49		2121	23160.1	3293.49			1765	3236.08	2.85		1956	2101.17	388.283
	1874	1325.38	131.5		1704	387.405	16304.4												1675	727.059	22.2941		1749	27.4211	1004.97			1833	9538.18	640.13		2122	2217.25	488.875			1766	4604.06	703.875		1957	3353.75	975.75
	1875	2028.82	1387.07		1705	3004.2	13307.5												1677	522.375	-97.8947		1750	985.803	80.7237			1834	759.828	68.5625		2123	146.833	15581.8			1767	770.444	-21.6667		1958	515.388	1673.82
	1876	3350.5	802		1706	727.271	5827.6												1678	180.65	13.975		1751	1328.92	762.536			1835	1301.71	30.4464		2125	3645.93	317.388			1768	14868.8	4821.14		1960	4204.56	3207.02
	1877	1206.03	485.593		1707	958.037	2900.19												1679	1334.37	75		1752	1527	362			1836	821.25	46.5789		2126	5511.16	1196.77			1770	1183.66	105.632		1961	695.611	63.9718
	1878	4828.5	2271.5		1708	586.475	1913.19												1680	708.875	81.8382		1753	6.17763	856.092			1837	657.61	40.4853		2127	690.344	11.2812			1771	857.706	117.853		1963	2888.73	1062.08
	1879	494.105	157.105		1709	316.281	12830.2												1681	98.5395	-8.125		1754	47.5652	1331.3			1838	1084.15	63.4632		2128	1726.29	1115.59			1773	1289.89	56.5395		1964	1519.83	367.118
	1880	2594.06	1588.63		1710	448.978	8374.86												1682	1404.55	45.2431		1755	-54.9737	1684.18			1839	773.778	50.8889		2129	1687.38	203.688			1775	13797	1337.46		1965	985.684	3703.6
	1881	3004.36	824.047		1711	639.278	13962.9												1683	849.75	36		1756	-9.72396	2144.78			1840	3211.59	254.565		2130	1385.73	717.961			1776	824.088	86.9		1966	787.704	414.664
	1883	1011	6232.57		1712	650.357	25298.8												1684	1355.51	58.2171		1757	286.941	4343.88			1841	1109.85	401.431		2132	4859.3	131.7			1777	3696.84	503.54		1968	620.786	336.857
	1884	610.637	313.85		1713	2849.81	74289.2												1685	29.2273	-0.801136		1758	-4.34868	637.171			1842	1282.05	-33.3553		2133	8090.6	1409.55			1778	3018.36	1166.77		1969	603.75	-14.9241
	1885	2126.83	1149.53		1714	638.577	4810.52												1686	2027.14	-38.1364		1759	-29.8026	3429.45			1843	960.062	104.031		2134	6389.06	848.155			1779	20192.3	3390.84		1971	7612.26	1864.14
	1886	1858.42	40945.2		1715	1152.12	56694.9												1687	750.031	13.5234		1760	-41.75	2198.94			1844	1435.21	52.9524		2135	8438.5	1232			1780	19057.8	1151.71		1972	1009.93	468.322
	1888	3271.83	3712.55		1717	872.048	4601.41												1688	140.885	-11.7143		1761	-40.25	1445.79			1845	799.975	59.35		2136	2015.99	215.17			1781	6107.61	339.868		1974	864.5	468.413
	1889	789.566	262.971		1719	739.375	2355.1												1690	2.6625	-1.13636		1762	1669.89	119.947			1846	1337.15	56.2237		2137	1092.07	170.375			1782	867.516	90.7188		1975	3939.59	2342.17
	1890	1286.49	309.938		1720	2331.17	11566.2												1691	1315.71	24.9375		1763	-29.8	720			1848	717.531	-73.4444		2139	2205.51	-12.8352			1783	611.333	25796.2		1976	1990.83	2604.99
	1891	336.273	289.636		1721	103.077	15954												1692	230.812	-4.375		1765	1714.25	158.307			1849	1323.32	188.513		2140	959.789	20.9408			1785	9514.42	980.151		1977	889.45	38.375
	1892	555.885	1487.99		1722	773.169	1746.41												1693	582.463	11.9706		1766	760.25	16.675			1852	9678.8	1111.08		2142	586.605	335.961			1786	1457.14	110.994		1979	800.204	279.618
	1893	620.49	9469.38		1723	411.322	10452.1												1694	-2.75	-5.4375		1767	-26.1648	1128.89			1853	879.625	111.25		2144	2040.83	433.268			1787	4341.58	1535.53		1980	898.056	269.423
	1895	1139.06	1568.23		1724	1312.91	11669.2												1695	656.867	23.9474		1768	-57.8684	3182.68			1855	1628	-43.6056		2145	2028.32	155.842			1788	662.664	80.3095		1981	317.35	8570.36
	1896	1602.35	809.017		1725	830.438	3049.86												1696	740.176	26.2353		1769	-47.9514	1604.44			1857	8708.9	13771.8		2146	1314.74	12301.7			1789	234.667	12561.4		1983	3553.69	2510.69
	1898	3215.63	32640.3		1726	1082.43	55463												1697	702.1	26.0662		1770	1356.14	104.423			1858	1476.97	103.02		2147	3989.95	746.357			1790	864.5	-11.4328		1984	577.211	484.079
	1900	2105.1	305.147		1727	2710.73	12047.5												1698	817.674	18.7847		1771	-43.0347	1349.06			1859	3124.5	184.5		2148	1450.14	385.159			1791	576.66	7379.28		1985	2825.21	1271.09
	1901	1789.5	69.2174		1730	1510.75	5619.44												1700	27.9487	-8.25		1773	-47.375	898.125			1860	1679.12	193.421		2149	1598.58	991.868			1792	412	237.56		1986	357.556	10844.3
	1902	3137.16	790.969		1731	3322.82	5025.01												1701	292.452	-2.5625		1774	25.2083	1779.54			1861	786.569	164.375		2150	1191.57	154.395			1793	1109.88	-17.75		1987	960.316	299.658
	1903	3164.51	1860.33		1732	596.607	31098.1												1702	8.58333	-3.71429		1775	12.7778	904.743			1862	1261.25	79.25		2151	2067.86	34.5724			1794	5908.72	564.824		1989	1173.04	522.958
	1904	1217.68	285.375		1733	2455.69	7132.26												1704	165.825	0.8		1776	-58.4079	2205.74			1863	11795.5	691.875		2152	4564.8	759.4			1795	3633.92	267.539		1990	1533.09	1505.3
	1905	2727.57	323.187		1734	150.679	12759.8												1705	1926.71	163.493		1777	-26.8889	946.778			1865	2848.25	218.909		2155	3740.89	814.474			1796	1783.03	28.7826		1991	1782.58	757.448
	1906	2046.7	550.609		1735	291.472	19440.3												1706	22.7105	6.05263		1778	1916.1	215.691			1867	1504.63	26.2697		2156	1461.81	555.147			1797	1982.95	187.322		1992	1083.54	35465.8
	1907	133.6	16613.3		1736	892.4	2614.96												1707	960.679	88.5357		1779	1.19737	892.026			1868	1300.07	-14.5833		2158	1530.15	252.303			1798	13526	951.231		1993	529.735	483.676
	1908	450.826	15499.1		1737	1213.04	8940												1708	842.643	12.7656		1780	-46.8889	1182.22			1869	962.988	51.225		2159	312.863	23955.3			1799	1478.06	-14.9375		1994	985.846	17825
	1910	970.5	203.045		1739	738.188	4078.62												1709	844.25	35.5		1781	-54.4062	1730.88			1870	1791.49	-21.125		2162	1448.41	281.105			1800	1326.05	146.731		1996	1305.39	312.132
	1912	1494.16	277.207		1740	1621.2	7536												1710	13.5078	7.42969		1782	-14.8421	857.868			1871	680.576	983.386		2163	1588.27	162.483			1801	3554.07	176.895		1997	1249.5	717.296
	1913	909.232	1005.09		1741	4024.75	25066.2												1711	805.286	17.2738		1783	-98.6184	2584.03			1872	1441.29	230.507		2164	2146.38	78.8125			1802	4448.65	217.077		1999	804.406	173.746
	1914	720.5	168.684		1742	816.479	4049.15												1712	877.4	1.2		1784	-374.634	18339.6			1873	2557.7	149.026		2165	1738.52	200.429			1803	910.728	337.493		2000	326.125	164.159
	1915	1982.68	1426.94		1743	1576.96	9270.56												1713	502.562	37.5		1785	-8.05263	2422.28			1874	2076.51	109.921		2166	4248.79	837.684			1804	9504.11	892.417		2001	1190.38	639.25
	1916	1391.4	-36.375		1744	1499.81	26209.9												1714	1102.74	91.4412		1786	-25.3421	1632.72			1875	4482.51	419.207		2168	2527.15	3205.49			1805	9860.05	550.093		2002	2306	643.5
	1917	884.5	6511.68		1745	1753.28	4970.59												1715	1760.55	20.2727		1787	-85.3906	2122.89			1876	2236.63	241.421		2169	761.62	2596.14			1806	727	24.3731		2003	1264.25	623.38
	1918	2631	2968.75		1746	2705.3	55993												1716	866.973	-40.8158		1788	-17.8289	785.914			1877	1042.59	195.013		2170	540.139	18432			1807	858.441	12.7941		2004	721.956	189.831
	1919	1067.37	64.3696		1747	1038.02	4409.7												1717	0	0		1789	1029.51	24.4167			1878	1109.5	57.8824		2172	2720.42	3611.29			1808	1053.39	224.887		2005	3785.45	441.646
	1920	1020.85	3317.64		1748	1628.29	4696.62												1718	59.4857	17.3333		1790	-22.7083	786.917			1879	803.737	18.1053		2174	13158.5	2941.72			1809	9120.54	903.605		2006	1066.5	43126.3
	1921	3508.99	755.854		1749	377.87	12186.5												1719	990.411	3.46094		1791	-9.34028	666.028			1880	1202.68	88.2353		2175	2924.75	268.182			1810	811.889	12.9583		2007	410.288	7226.4
	1922	189.486	4999.83		1750	615.175	3702.78												1720	1400.38	106		1792	46	1250.14			1881	1082.99	26068.5		2176	2406.93	347.13			1811	899.736	-19.0972		2009	394.046	255.375
	1923	4307.83	69740.1		1751	2007.26	3589.58												1721	1361.81	-3.04762		1793	-29.0139	1328.22			1882	808.625	175.125		2177	1659.74	486.053			1812	4121.11	128.674		2010	1253.41	270.176
	1924	265.57	7929.76		1752	3959.22	11403.7												1722	48.54	6.99		1794	9.31579	1354.47			1883	2176.42	274.295		2178	666.033	23994.2			1813	1277.82	199.514		2013	5085.29	2290.67
	1925	1758.65	696.25		1753	3532.38	17585.7												1724	-189.062	-13.2625		1796	-40.9013	1170.38			1884	1069.28	122.317		2180	5155.37	711.579			1814	1664.42	64.2895		2014	1520.42	128.737
	1926	1886.74	2041.25		1754	1711.92	3720.52												1725	222.071	56.0476		1797	634.789	559.816			1885	33964.5	1905.93		2181	2702.35	432.093			1815	990.188	111.583		2015	674.449	27252.8
	1928	1110.33	881.891		1755	645.231	2516.59												1726	472.93	63.5156		1798	-18.2375	1046.86			1886	679.664	220.572		2182	2881	651.684			1816	1801.27	76.3696		2016	728.368	299.474
	1929	1797.19	1292.31		1756	687.562	1630.4												1727	592.82	-19.525		1799	-57.2368	1121.08			1887	1670.85	165.396		2183	340.606	13626.2			1817	658.039	71.7829		2017	1493.75	753.517
	1931	2885.07	1566.18		1757	3724.25	10800.6												1729	695.75	-2.31579		1800	737.088	-9.29412			1888	19887.1	1699.8		2184	758.895	341.24			1818	1073.81	116.274		2018	4331.78	2631.22
	1932	1034.86	698.794		1758	1338.73	17811												1730	23.725	22.6125		1801	-23.1875	794.25			1889	3950.5	222		2185	3723.37	623.158			1819	4517.7	366.901		2019	1547.81	533.5
	1933	3240.5	1061.75		1759	1320	7209.32												1731	1500.87	13.0921		1803	-110.474	2764.92			1891	1074.83	79.0833		2186	3218.97	1478.27			1820	362.019	27693.1		2020	1297.36	241.053
	1934	617.159	575.295		1760	2537.19	12184.7												1732	46.4828	3.42045		1804	8.875	1537.77			1892	3707.44	335.375		2188	1174.16	284.026			1821	5395.16	730.076		2021	1131.61	641.579
	1935	3089.62	1156.5		1761	1625.27	12052.8												1733	1509.76	14.25		1805	-16.5441	725.919			1893	1531.01	206.625		2189	1452.55	308.513			1822	3298.42	7442.46		2022	1175.77	481.886
	1937	897.52	647.895		1762	716.915	39719.3												1734	15.881	-6.82812		1806	52.7059	748.647			1894	628.969	-252.742		2190	824.868	91.5441			1823	593.579	28.0921		2023	4178.85	1801.66
	1938	4539.92	1432.08		1763	1925.84	39046.1												1735	2478.08	40.5789		1807	-128.443	3015.02			1895	1400.02	112.201		2191	2354.02	1451.14			1824	1361.96	67.1711		2024	753.546	98.54
	1939	1153.51	148.019		1764	2995.59	55293.3												1736	62.0506	-24.1		1808	-53.24	2416			1896	639.735	20.5373		2193	942.789	119.053			1825	605.965	80		2025	1774.96	698.961
	1940	2356.79	222.787		1765	1031.74	70462.5												1737	1066.66	40.8889		1809	-38.0761	1951.02			1897	2907.72	278.783		2194	1281.6	153.139			1826	1009.42	148.368		2026	957.688	877.477
	1941	1059	466.75		1766	767.042	2520												1738	1293.24	-36.7059		1810	-29.7011	1095.03			1898	828.688	-144.187		2195	478.662	124.838			1827	0	0		2027	755.579	309.316
	1942	1090.18	919.091		1767	177.08	10103.3												1739	986.014	-36.2292		1812	1422.89	27.0682			1899	1200.45	169.721		2198	2486	250.676			1829	2630.18	149.3		2028	526.271	2437.85
	1943	971.457	339.935		1768	466.375	1369.5												1740	1368.49	-93.7237		1813	61.4211	2446.84			1900	1284.08	17.1184		2201	758	7130.38			1830	1594.48	224.011		2029	773.295	775.659
	1944	3330.52	2250.48		1770	699.708	1684.79												1741	712.136	29.4559		1814	1469.76	201.941			1902	846.764	4673.48		2202	3229.04	492.63			1831	1147.94	252.279		2031	1283.56	854.98
	1945	1675.84	612.575		1771	623.645	1745.7												1743	239.55	42.9		1815	-34.6645	991.303			1904	1072.47	112.329		2203	712.211	229.026			1832	1239.8	29.8158		2032	1100.66	1178.46
	1946	4416.54	68713.4		1772	590.125	2569.83												1744	762.224	41.3421		1816	-0.921053	573.618			1905	739.605	-4.55263		2205	920.882	333.697			1833	14081.1	4207.48		2034	619.906	137.812
	1947	635.3	535		1773	1401.52	2944.72												1745	1979.15	25.3807		1817	-10.1765	1106.49			1906	1587.29	-51.7159		2207	925.68	155.203			1835	689.118	191.132		2035	1091.94	263.647
	1948	1060.44	0.909091		1774	1836.98	28371.6												1746	207.05	11.275		1818	-8.82812	1728.5			1907	1530.5	108.5		2210	966.455	29332.8			1836	3895.27	2348.38		2036	1973.73	3377.41
	1949	1261.86	209.925		1775	169.75	7057.56												1747	-39.525	-47.275		1819	-23.4605	1069.76			1908	5788.23	11594.8		2211	1508.85	205.716			1838	34216.5	2664		2038	703.474	448.947
	1950	1839.15	475.5		1776	257.043	9666.64												1748	583.537	21.3971		1820	302.974	165.842			1909	1470.47	498.905		2213	1023.1	101.507			1840	1169.97	151.658		2039	1261.58	590.375
	1951	2979.09	951.5		1777	850.264	5906.18												1749	331.875	21.625		1821	-21.9474	589.007			1911	2043.07	33.8309		2214	749.125	170.438			1841	886.007	247.75		2040	1795.95	389.703
	1952	418.167	1022.79		1778	1042.21	6551.5												1750	582.235	33.8088		1822	623.493	35.5658			1912	4981.62	342.292		2216	502.75	19498.8			1842	1384.53	23.9583		2041	1126.76	698.794
	1953	840.375	164.875		1779	471.375	19600.4												1751	769.45	-21.2125		1823	1000.52	330.668			1913	1410.14	111.919		2217	518.553	178.408			1843	1541.4	106.77		2042	961.75	1173.71
	1954	1269	763.25		1780	256.375	6916.38												1752	2137.08	19.2045		1824	14.2632	1108.26			1914	1146.84	48.3125		2219	1121.38	679.237			1844	1851.62	185.401		2043	1807.29	423.026
	1955	556	11659		1781	3597.47	8148.06												1753	871.507	16.0486		1825	-25.2434	774.046			1917	882.444	252.931		2220	2741	616.5			1845	4051.43	245.239		2044	1386.95	560.474
	1956	1454.9	361.9		1782	1420.44	13694.1												1754	-6.42683	26.1071		1826	14.1389	905.569			1918	1244.55	272.196		2221	1228.82	89.5			1846	571.359	115.422		2045	853.375	463.592
	1958	4470.93	1426.48		1783	1661.07	6860.17												1755	0	0		1827	-114.18	5062.15			1919	1127	-20.8947		2222	1170.64	140.444			1847	1986.35	24.9125		2046	491.408	314.333
	1959	2092.7	3263.31		1784	1102.73	17888.2												1756	-0.947368	-2.8125		1828	-73	2126.06			1920	21764.4	1328.94		2224	640.797	114.953			1848	3044.25	252.875		2047	801.5	578.688
	1960	1530.4	871.225		1785	572.241	7193.96												1758	6.75	-5		1829	-57.4211	2224.11			1921	861	39.9779		2225	1027.75	1565.75			1849	2076.72	68		2048	502.471	443.721
	1961	3227.92	515.625		1786	1425.7	8920.78												1759	907.605	8.30921		1831	-14.1324	568.846			1922	887.066	46.4403		2227	3182.05	561.409			1850	1227.05	416.118		2050	18.9787	-4.71277
	1962	1145.19	348.043		1787	501.256	1409.31												1760	125	-22.1591		1832	823.322	109.257			1923	656.906	155.188		2228	1799.57	882.13			1851	679.734	49.375		2052	3865.36	1443.84
	1963	219	6165.6		1788	1123.85	4756.31												1761	53.1579	14.6458		1833	-21.5	913.625			1924	1109.4	-165.2		2229	245.683	10190.6			1852	934.844	11.0938		2053	4861.6	2154.29
	1964	1998.07	808.1		1790	1052.26	6901.98												1762	1517.91	-5.6087		1834	26.9853	969.287			1925	3320.57	443.263		2230	791.441	529.355			1853	1214.65	20.7125		2054	3196.2	5239.28
	1966	701.975	112.237		1791	852.226	17195.4												1764	747.833	-8.25		1835	539.278	88.3403			1926	11370.8	648.406		2231	2051.98	21727			1854	2580.82	164.046		2056	951.368	240.598
	1967	1618.67	1342.22		1792	1785.06	7831												1765	38.3667	1.16667		1836	2041.18	138.618			1928	4654.24	297.43		2232	5713.52	1689.21			1855	1179.83	3454.9		2057	829.478	815.413
	1968	4243.27	2753.27		1793	1092.61	6768.99												1766	-0.55	11.9		1837	-30.0652	1702.74			1929	901.611	154.424		2233	1226.28	10835.6			1856	1316.22	171.219		2058	1440.92	273.875
	1969	798.042	-42.875		1794	1144.2	5110.93												1767	29.1364	-2.11932		1838	1853.33	87.7566			1930	1561.12	84.875		2234	1631.38	248.625			1858	2936.14	33.505		2059	656.71	4347.48
	1970	1010.88	319.875		1795	606.26	16394												1768	16.9	-7.2		1839	-54.1711	1193.7			1931	925.219	-30.7188		2235	401.889	83.2222			1859	2154.85	153.434		2064	874.992	28678.2
	1971	359.708	9596.04		1796	695.6	1578.36												1769	750.183	18.1484		1840	-19.0536	1204.89			1932	1111.95	90.3603		2236	1064.72	115.328			1861	4618.69	-955.01		2065	3145.36	2250.06
	1972	228.25	11312.5		1797	269.435	10043.5												1770	37.35	-14.15		1841	-27.8487	2056.43			1933	1187.41	530.296		2238	5574	4570.91			1863	1943.54	173.63		2067	694.424	48.7113
	1973	1228.11	309.737		1798	1365.18	5695.75												1771	1105.8	41.75		1842	-17.5729	1998.98			1934	826.386	9.45455		2239	1430.41	278.142			1865	2520.58	416.917		2070	475.706	125.853
	1974	1804.02	1486.9		1799	1280.15	20446.5												1772	92.4286	7.1875		1843	15289.1	5910.37			1935	708.972	346.785		2240	1756.98	1104.75			1866	769.109	15.9766		2071	1444.88	283.855
	1975	471.368	65.3971		1800	710.083	2035.95												1775	249.85	19.65		1844	-36.3456	857.125			1936	4514.92	309.417		2241	682.757	68.3289			1867	2819.68	-291.619		2072	1458.86	475.667
	1976	1312.55	475.73		1801	506.528	11758.8												1777	2172.32	19.8352		1845	126.963	7.1625			1937	1080.53	19.0588		2244	2759.66	506.505			1868	2133.89	-36.1053		2073	1694.73	945.818
	1977	2786.67	5046.64		1802	350.25	16167.4												1779	81.0376	-5.375		1846	-113.797	4185.73			1938	1424	49.5		2245	270.73	3458.96			1869	8299.68	1037.16		2074	661.528	168.722
	1978	1107.13	3099.07		1803	2013	7204												1780	763.769	-10.4125		1847	5.275	9.7875			1939	9540.59	679.365		2246	867.475	23374.9			1870	982.354	625.326		2075	684.25	342.517
	1979	2458	4346.44		1804	254.775	16613.4												1781	809.65	21.9187		1848	-36.5417	2058.62			1940	1189.06	59.7841		2247	5015.88	944.25			1871	822.053	28.4211		2076	941.736	316.139
	1980	3314.79	1471.58		1805	2234.9	10129.5												1782	1213.49	-24.1316		1849	1676.32	199.855			1941	1060.01	374.98		2248	1007.17	19899.4			1872	583.375	33.25		2080	6848.01	5885.95
	1981	2345.38	829.675		1806	2517.18	46587.4												1783	40.5455	23.5		1850	6.38043	855.364			1942	4380.68	438.388		2249	608.5	245.625			1874	903.074	146.706		2081	1117.77	360.589
	1982	657.776	293		1807	1216.93	4696.81												1785	1034.25	0.15		1851	364.211	745.066			1944	2402.34	145.289		2250	1143	135.921			1875	578.075	22.525		2082	3454.04	1980.13
	1983	1609.64	657.342		1808	1864.08	12083.4												1786	380.438	36.2292		1852	1445.71	72.5952			1945	1883.26	124.125		2251	2348.32	557.414			1876	5930.05	342.9		2083	1311.07	1308.29
	1984	4844.93	18237.4		1810	1027.88	5352.92												1787	660.487	69.05		1853	20.8315	1440.34			1946	1189.16	-8.81579		2252	3046.87	3.14474			1877	1020.69	25.5556		2084	1296.39	1525.82
	1985	370.184	245.632		1811	631.08	24312.9												1788	365.375	35.0375		1854	722.829	13.1382			1947	1514	124.882		2253	2065.69	892.726			1878	662.965	16.375		2085	634.521	173.704
	1986	1397.05	546.738		1812	144.125	29183.8												1789	824.974	34.1711		1855	-128.12	3721.4			1948	969	44.5		2254	3610.88	617.184			1879	12333.7	912.592		2086	2946.06	1276.41
	1987	4262.08	881.797		1813	2346.4	7234.33												1790	157.262	-6.625		1856	-83.7969	2295.61			1949	5124	130		2255	2068.51	1962.62			1880	3331.13	167.816		2087	1476.2	513.433
	1989	2080.5	872.037		1814	1154.12	29524.5												1791	146.188	14.8125		1857	707.388	119.572			1950	3178.36	68.7727		2257	421.833	130.139			1881	1761.12	222.292		2088	5377.16	27380.8
	1990	3337.04	833.929		1815	398.94	7945.08												1792	-0.975	-12.05		1858	12.6	13.7			1951	5407.59	1150.97		2258	6929.84	1076.47			1882	806.667	27.6667		2089	795.605	500.267
	1991	4255.12	5221.72		1816	1854.78	7803.87												1793	1340.88	15.875		1859	675	79.0526			1952	4982.44	319.61		2259	380.61	124.824			1883	848.799	107.319		2090	3807.78	2114.86
	1992	749.965	180.667		1817	1454.5	4138.12												1794	798.487	69.9688		1860	939.312	195.562			1953	1466.53	36.6875		2260	952.235	150.206			1884	951.25	80		2091	3673.5	3289.5
	1993	1715.44	213.68		1818	1132.98	29664												1795	1182.5	13.4792		1861	1.76316	1998.01			1954	753.711	1960.15		2261	5927.26	3612.92			1885	2218.84	238.091		2092	3115.32	802.691
	1996	459.461	213.743		1819	589.214	9701.93												1796	387.915	-0.354167		1862	100.781	1170.94			1955	980.654	-18.0147		2262	1137	89.1111			1886	1689.02	109.238		2093	2427.5	953
	1997	800.829	352.267		1820	1393.38	16484.8												1797	763.35	-28.25		1863	1040.14	70.6842			1956	2236.71	165.152		2264	1655.62	264.75			1887	2483.64	192.276		2094	534.896	522.296
	1998	1436.57	241.428		1821	702.005	8862.26												1798	1460.93	15		1864	1087.28	-1.75			1957	1698.75	173.5		2265	5229.53	1214.11			1888	1566.26	175.789		2096	8004.52	4157.88
	1999	1996.2	642.348		1822	350.694	8662.74												1799	576.713	-6.38158		1865	-49.75	2482.47			1958	2355.22	168.875		2266	630.257	184.287			1889	1597.91	88.5263		2097	782.586	4753.12
	2000	714.74	14641		1823	1392.08	22399.4												1800	63.2105	-4		1866	-50.315	2723.15			1959	1333.29	95.3958		2267	589.954	59.7105			1891	667.797	43.2031		2098	770.579	272.36
	2001	430.458	15314.8		1824	419.044	747.806												1801	952.75	25.7153		1867	-2.23684	708.737			1960	4344.92	270.184		2268	1653.72	2671.6			1892	14355.2	-351.75		2099	2089.08	25055.1
	2002	1585.04	363.519		1825	1116.17	8322.82												1802	1343.74	30.5789		1868	1778.88	518.765			1962	769.987	472.171		2269	1472.07	245.466			1893	1053.1	-146.231		2101	597.688	220.063
	2003	1332.12	908.608		1826	862.375	16515.4												1803	893.056	15.7778		1869	1618.51	1048.64			1963	6083.72	248.625		2270	696.16	2788.24			1894	1146.39	109.487		2102	2022.63	599.895
	2004	1774.43	2493.59		1827	1082.32	4760.48												1804	2307.4	33.7279		1870	46.2	5866			1964	2403.13	-3.86		2271	1120.6	296.787			1896	2928.38	144.908		2103	4020.34	2127.31
	2005	2993.7	790		1828	321	13070.2												1805	1868.87	-17.1875		1871	1805.5	16			1965	1742.43	220.033		2272	2439.9	1052.42			1897	884.711	-14.2895		2104	2123.34	922.446
	2006	549.292	274.464		1829	268.805	29468.5												1806	85.4444	1.3		1872	-15.6597	787.062			1966	1133.59	13.3529		2273	6405.48	1924.82			1898	2103.28	253.132		2106	2321.5	901.826
	2008	510.583	166.458		1830	758.05	3048.37												1807	225.875	-18.75		1873	1204.89	70.6447			1967	5862.14	492.899		2275	1437.82	254.171			1899	1162.38	1024.08		2109	2823.32	1466.58
	2009	2155.49	572.656		1831	672.552	2614.54												1808	623.753	17.0536		1874	102.211	661.592			1968	952.667	94		2277	2362.62	378.609			1900	843.53	15956.6		2110	1309.27	514.757
	2010	415.599	1320.71		1832	1323.04	6440.57												1809	931.013	53.3289		1875	-13.0526	804.526			1969	730.688	58.1319		2278	216.577	10560.1			1901	7986.93	680.704		2111	5978.17	4782.17
	2012	720.105	329.52		1833	165.875	8138.08												1810	122.636	-41.7279		1876	-13.2727	896.182			1970	1772.09	178.182		2281	841.526	1882.35			1902	6035.25	99.25		2112	5004.16	3553.66
	2013	484.118	70		1834	799.156	1698.37												1813	948.667	17.1111		1877	1.73684	695.421			1971	2889.2	185.4		2282	2710.5	3981.84			1904	3383.31	454.375		2113	759.111	694.444
	2014	2244.7	496.855		1835	687.821	12326.6												1814	579.628	-19.1313		1878	3595.31	112.138			1972	711.405	362.357		2283	668.819	80.1806			1905	850.5	204.188		2114	851.547	129.952
	2015	1290.75	249.197		1836	1233.57	7313.4												1815	17.2625	11.5875		1880	-31.3947	1278.97			1973	3141.84	319.947		2285	4819.41	851.132			1906	694.07	149.672		2115	771	467.424
	2016	1199.4	246.932		1838	1745.78	47922.7												1816	1286.33	46.1111		1881	-136.958	2871.35			1974	992.417	144.271		2286	4179.12	645			1907	2577.74	462.803		2116	1673.3	70955.6
	2017	942.738	877.775		1839	854.069	2620.66												1817	603.31	-15.7569		1882	-17.9706	675.801			1975	3527.65	5.94022		2288	4888.56	314.47			1908	2221.71	146.088		2117	202.094	10650.8
	2018	2485.45	291.649		1840	2395.29	10019.8												1818	1484.53	32.2237		1883	27.375	952.086			1976	4277.93	327.967		2291	3050.19	1305.06			1909	929.703	2320.18		2118	1008.5	496.026
	2019	871.587	1024.77		1841	2990.18	9245.43												1819	40.8125	-8.375		1884	726.65	12.3			1977	1322	95.4737		2292	9008.11	1980.04			1910	1070.65	177.292		2119	827	112.851
	2021	959.646	346.979		1842	278.327	8652.12												1820	611.114	25.9632		1885	-55.75	1631			1978	1342.12	163.338		2293	655.833	74			1912	2251.44	246.667		2121	1514.88	1536.12
	2022	1735	1922.62		1843	897.742	10713.8												1821	21.3095	1.57143		1887	50.2763	1266.07			1979	1436.25	44		2294	895.94	7269.45			1913	1516.58	-0.375		2124	1141.22	172.781
	2023	2060.6	575.825		1844	2759.69	11715.2												1822	895.272	40.1625		1888	909.875	271.236			1980	1002.09	64.1562		2296	865.5	726.476			1914	5429.3	364.043		2125	461.605	1004.3
	2024	1950.08	613.87		1845	2609.52	33867.1												1823	1395.32	17.3929		1889	-38.8967	1506.17			1982	4091.53	270.935		2297	2808.09	480.336			1915	955.094	16.8906		2126	62.54	11068.6
	2025	267.111	5568.82		1846	1863.83	46998												1824	76.2143	1.47619		1890	25.1944	708.042			1983	680.079	167.467		2298	3569.84	586.29			1916	5830.72	338.935		2127	1038.21	169.324
	2026	459.756	840.863		1847	871.45	1621.95												1825	1157.39	8.76316		1891	9.07895	545.066			1984	1592.08	90.1736		2299	2411.17	461.902			1917	733.038	113.294		2128	680.263	353.676
	2028	1101.82	156.816		1848	214.429	17859.6												1826	503.975	17.45		1892	-56.5526	2039.93			1985	814.697	133.382		2300	4465.84	678.36			1919	13589.6	915.243		2129	1129.09	2026.1
	2029	1073.09	1635.56		1849	524.8	3371.7												1827	455.05	17.25		1893	-29.5197	1068.12			1986	6941	171.423		2301	1587.84	188.842			1920	4866.42	89.1053		2130	1020.72	1780.08
	2030	3258.1	2722.42		1850	1027	31400.9												1828	1459.44	83.4375		1894	-16.224	1339.12			1987	755.721	76.375		2303	1077.24	1235.59			1921	1553.19	107.309		2131	1822.63	7588.63
	2031	2402.31	767.379		1851	719.15	2561.39												1829	1547.24	128.697		1895	-115.2	3870.55			1989	923.641	96.7422		2306	495.338	132.309			1922	1011.9	68.175		2132	296.917	20984.9
	2032	518.2	203.8		1852	3530	63760.3												1830	1552.21	-9.78947		1896	43.6184	1684.78			1990	1305.08	77.8125		2307	11084.9	1715.56			1924	1126.12	123.65		2133	750.485	515.632
	2033	517.889	4020.74		1853	3398.32	14266.3												1831	1468.66	11.25		1897	2258.07	852.092			1991	2746.14	179.857		2308	3154.63	415.158			1926	750.419	85.1176		2134	1133.72	287.921
	2034	1864.75	1393.31		1854	854.923	4005.81												1832	1058.6	-14.4		1898	-20.3158	1586.37			1992	2559.3	238.636		2309	2214.64	1297.76			1927	456.365	1781.93		2135	155.13	8196.04
	2035	1032.1	4080.2		1855	2913.34	66687												1833	520.175	-0.8		1899	18.3882	1898.11			1993	3439.06	19206		2311	2186.13	431.5			1928	1621.89	68.2222		2139	1407.56	401.132
	2036	1816.39	287.739		1856	2162.68	22422.8												1834	21.2216	1.52841		1900	993.703	12.8438			1994	1608	129.789		2312	34169	38044.3			1929	4889.61	448.159		2140	375.737	385.947
	2037	961.6	208.35		1857	675.675	4359.24												1835	1115.22	90.1447		1901	811.737	76.4737			1995	6791.75	1028.9		2313	5177	510.562			1930	1224.5	32.5		2141	698.579	547.52
	2038	477.875	9094		1858	591.125	3745.84												1836	807.75	53.0417		1904	727	44.6667			1996	1237.29	115.333		2314	1331.5	137.75			1931	6132.33	182.769		2143	670.344	33428.5
	2040	2489.56	545.438		1859	1328.87	27206.3												1837	73.2963	8.1875		1905	-42.1711	1086.68			1997	1228.78	133.706		2315	574.081	-72.057			1932	2377.9	138.963		2144	1638.86	5018
	2041	3509.6	3069.11		1860	1600.75	15516.7												1838	1659.74	-4.34211		1906	-38.4408	3319.16			1998	849.148	107.203		2316	2725.64	526.119			1933	14017.9	819.489		2145	556.066	985.264
	2042	356.807	641.182		1861	2232.45	7113.01												1839	857.64	-70.1316		1907	-20.733	1397.99			1999	5117.66	457.447		2317	979.946	18886.3			1934	3702.74	344.966		2146	561.431	155.07
	2043	330.132	477.632		1862	771.363	11241.3												1840	2.06024	-108		1908	4137.22	290.03			2000	1767.51	84.8158		2318	2699	1608			1935	4515.53	340.895		2147	4204.22	1829.34
	2044	2185.15	90.6188		1863	528.321	28025.8												1841	4375.14	30.7548		1909	776.757	39.3553			2001	2110.41	236.875		2319	1437.62	377.605			1936	9419.09	679.594		2148	2038.86	442.167
	2045	2375.5	603.375		1864	3372.24	23071.7												1842	641.507	-0.427632		1910	705.074	32.0147			2002	1169.21	68.2895		2320	238.774	12109.9			1937	2519.78	60.9896		2149	249.022	9001.57
	2046	737.895	223.388		1865	542.762	1999.06												1846	1527.32	19.8882		1911	1.31579	1394.43			2003	1162.12	75.8235		2321	704.426	144.075			1938	8045.54	2174.5		2150	187.183	6098.55
	2047	1226.17	346.833		1866	638	29813.7												1848	925.956	14.6471		1913	-81.5761	2189.24			2004	7561.94	687.187		2322	1206.71	78.7222			1939	1743.09	182.678		2151	1400.55	556.698
	2048	1160.25	2514.75		1867	3099.89	11343.9												1850	0	0		1914	-120.154	6894			2005	585.897	42.8		2323	6381.7	758.114			1940	12617.2	2825.73		2152	2401.58	2831.68
	2049	266.831	29.65		1868	922	18872												1851	13.25	-2.83333		1915	80.8205	1.425			2006	7251.04	716.968		2324	2705.47	4384.03			1941	1488.5	191		2153	272.979	7361.05
	2050	875.281	335.513		1870	143.513	12129.9												1852	1434.62	17.5966		1916	-7.11364	1273.18			2007	3602.05	726.697		2325	6377.67	1256			1942	531.913	959.63		2154	1527	545.75
	2051	-151.982	32841.4		1871	1075.37	8162.54												1853	143.3	-2.275		1917	-36.4062	1311.96			2008	7464.07	500.083		2326	553.715	226.972			1943	1781.55	-24.7216		2156	497.125	144.271
	2052	2316.69	1180.18		1872	1058.74	29287.2												1854	28.8085	-2.14583		1918	3219.96	730.36			2010	875.014	-10.8056		2327	15918.8	2651.22			1944	636	1221.59		2157	2368.78	1155.83
	2054	727.269	10152		1873	1456.46	6578.67												1856	577.901	30.1382		1919	664.359	17.0938			2011	960.281	105.75		2331	2515.76	509.193			1945	1131.5	-165		2158	2123.16	526.359
	2055	780.4	287		1874	2728.22	13326												1857	2216.64	35.25		1920	-30.2321	801.607			2012	1326.24	26.4118		2332	1703.71	226.647			1946	865.617	262.156		2159	3510.04	24.901
	2057	1872.33	716.173		1875	1703.75	4959.69												1858	145.325	27.425		1921	-197.239	5434.72			2014	700.789	1993.08		2333	2345.12	397.837			1947	1658.42	1784.37		2160	1100.68	8784.15
	2058	860.852	109.693		1876	2674.52	6272.71												1859	371.808	10.5385		1922	-2.79167	845.333			2015	2915.32	563.421		2334	560.824	117.529			1948	8198.53	562.542		2161	882.75	105.107
	2059	1052.95	588.931		1877	2382.04	19990.8												1860	1010.02	39.6		1923	1635.75	25.8026			2016	2599.58	-110.202		2335	3327.53	448.039			1949	3938.7	961		2162	505.401	268.013
	2060	1489.67	761.08		1878	2046.67	7735												1861	830.929	33		1924	-20.6176	636.706			2017	3717.18	481.154		2336	1066.78	352.375			1950	1730.66	18.7368		2163	366.667	596.667
	2061	220.317	9286.38		1879	149	10144.2												1862	300.885	27.8375		1925	-143.263	4602.26			2018	2547.09	372.455		2337	534.263	121.842			1951	5852.61	395.087		2165	4743.16	8189.63
	2063	1023.83	544.775		1880	2971.58	63603												1863	489.013	19.5066		1926	113.25	545.319			2019	1118.53	118.088		2339	1208.42	225.597			1952	1322.06	64		2166	1121.22	1601.71
	2064	982.667	224.271		1881	4451.3	57021.1												1864	1498.7	14.5694		1927	-20.2222	1153.11			2020	9412.53	1677.18		2342	2350.71	205.211			1954	2116.54	95.1711		2167	689	248.125
	2065	804.812	388.5		1882	1760.57	3789.5												1865	32.1026	-20.25		1928	377.717	934.921			2021	835.625	30.3786		2344	1173.15	950.793			1955	1096.37	28.7578		2168	911.967	384.618
	2066	1857.96	543.8		1884	2987.01	15327.6												1867	548.844	-30.7812		1929	-10.4688	3335.63			2022	1575.01	12.0987		2345	724.13	4547.8			1956	1026.97	57.7778		2169	337.433	14275.3
	2067	1178.87	589.597		1885	2709.93	12002.2												1868	1080.37	75.3684		1930	1053.92	-23.3068			2023	3227.84	204.198		2346	2142.79	808.88			1957	616.667	17.6338		2170	1201.08	1293.63
	2068	603.566	88.4079		1886	587.72	7355.29												1869	615.656	25.2188		1931	-70.0573	1352.05			2024	2173.65	179.375		2347	739.75	80.75			1958	1957.71	-169.172		2171	706.389	176.319
	2069	767.868	146.829		1887	1444.41	13929.4												1870	257.062	17.6937		1932	1081.59	17.0329			2025	2148.59	68.1053		2348	8530.5	1187.92			1959	543.572	61.9408		2172	1922.99	3547.68
	2070	893.835	741.148		1888	2810.87	14309												1871	743.143	10.8571		1933	708.645	153.526			2026	2232.39	221.658		2349	3844.45	530.727			1961	1403.62	120.69		2173	5357.95	7959.34
	2072	1431.76	482.826		1889	700.219	2197.5												1872	445.082	-5.8		1934	197.597	205.062			2027	2339.12	208.575		2350	944.618	911.763			1962	2185.25	188.254		2174	975.451	341.979
	2073	597.194	2898.91		1890	775.243	48833.1												1873	20.6	18.1		1935	-56.7065	1151.93			2028	12270.5	852.806		2351	2449.96	335.697			1964	1461.62	213.307		2175	168.88	10018
	2074	2651.87	6027.64		1891	2193.22	15927.2												1874	855.729	-6.14583		1936	446.75	51.5			2029	1359.23	173.476		2352	592.238	135.5			1965	1281.4	168.014		2176	768.413	66.3375
	2075	1002.14	439.3		1892	1369.71	24129.6												1875	1637.8	48.6739		1937	-23.7368	2657.09			2031	2508.53	250.421		2353	1255.28	232.699			1966	1268.18	130.529		2177	477.656	270.414
	2076	865.787	370.175		1893	463.734	27091.8												1876	1161.86	-38.0938		1939	-48.4792	788.771			2032	1444.72	-31.3947		2356	3208.05	53.2632			1967	1150.27	469.455		2178	1309.12	678.112
	2077	1321.27	331.619		1896	1251	2395.74												1877	1645.21	75.9474		1940	19.0761	707.717			2033	1075.26	13.4706		2357	1287.28	62.4934			1968	1002.22	86.2171		2179	1026.35	738.542
	2078	748.395	288.132		1897	1074.32	4057.72												1878	26.875	-9.67857		1941	-30.9803	1183.32			2034	733.441	75.1985		2358	844.434	275.5			1969	797.109	1007.2		2180	1222.18	306.929
	2080	1889.89	1801.08		1898	1962.09	7313.03												1879	0	0		1942	-54.14	2301.26			2035	1483.46	238.458		2359	2279.84	3808.4			1970	2160.29	142.167		2181	2067.66	851.728
	2081	1521.72	3294.76		1899	682.4	3315.26												1880	856.118	-26.3056		1943	165.158	1623.82			2036	1045.88	97.875		2361	4870.99	815.776			1971	7993.47	885.353		2182	4394.62	1119.08
	2082	1935.42	1987.12		1900	1615.92	7390.65												1881	1014.51	-10.1687		1944	-88.9868	2016.46			2037	1817.44	20.125		2362	3394.3	877.13			1972	752.375	186.437		2183	715.868	258.171
	2083	1270.03	249.691		1901	607.387	30619.8												1882	1803.81	13.619		1945	51.2105	1678.42			2038	6248.7	618.13		2363	1033.24	14896.4			1973	1321.14	139.732		2184	4755.13	3427.62
	2084	3143.4	617.385		1902	954.657	3561.27												1883	46.6375	-10.2312		1946	9.53947	1271.63			2039	1845.51	8.94737		2364	560.059	78.2647			1974	4783.62	297.42		2185	5570.44	2537.64
	2086	1460.45	1469.59		1903	1469.55	9588.55												1884	77	17.75		1947	-73.6579	1945.05			2040	434.289	1149.9		2365	5878.03	985.921			1976	3266.81	682.104		2186	3032.48	3816.37
	2087	1331	273		1904	910.625	1792.12												1885	800.404	4.49265		1948	3639.47	324.786			2041	843.944	45.6667		2366	2036.86	71.8224			1977	792.581	112.132		2187	621.471	281.896
	2088	2372.79	808.662		1905	441.6	1103.58												1886	291.175	23.45		1949	-47.1579	2867.79			2042	2010	62.75		2367	2547.75	263.943			1978	1172.47	8635.26		2188	192.556	8206.7
	2089	2293	697.208		1906	2173.61	9327.69												1887	701.515	22.6765		1951	1448.34	60.7784			2043	8706.08	323.598		2368	2355.76	95.3667			1979	2760.57	29540.9		2190	6798.75	1731.22
	2090	916.5	1297.5		1907	437.125	13581.9												1888	773.861	33.2829		1953	-82.3478	3649.09			2044	1373.12	170.737		2369	570.789	657.88			1980	795	6		2191	580.211	41.8947
	2092	775.396	1444.97		1908	3376.54	9036.54												1889	989.773	-33.8438		1954	-63.9474	1488.36			2045	1810.61	123.316		2370	1927.15	186.105			1981	814.641	91.9922		2193	1302.88	3236.62
	2093	2134.34	320.85		1909	902.699	36925.5												1890	1249.07	-15.3088		1955	-75.0217	1266.28			2046	151.045	11.8889		2371	909.04	1250.68			1982	5689.42	588.923		2194	606.755	4521.88
	2094	1184.79	666.838		1910	4074.55	8939.3												1891	199.275	-54.1		1956	-37	1199.04			2047	3991.08	264		2374	1045.49	71.3456			1983	630.721	7749.27		2195	446.194	15991.2
	2096	1312.45	323.969		1911	1205.4	4756.4												1892	1559.43	49.9286		1957	-88.4375	2358.83			2048	2705.06	11.3977		2376	2851.46	569.079			1984	1355.99	58.2		2197	427.603	356.246
	2097	717.5	403.125		1912	1041.28	5221.51												1893	797.684	-5.75658		1958	1191.26	77.4211			2049	639.066	3.93421		2377	1085.59	216.971			1986	507.592	33.6974		2198	1045.17	815.428
	2098	880.787	462.088		1913	761.14	2957.27												1896	1010	10.25		1959	15.4271	923.125			2050	4194.12	292.375		2378	3346.94	587.313			1988	2993.5	2920		2199	843.472	328.914
	2099	1087.25	273.5		1915	1235.57	6785.89												1897	96.2	17.4		1960	864.833	391.111			2051	11801.5	853.198		2380	195.236	8562.89			1990	4062.68	49.775		2200	6321.87	2301.03
	2100	1475.2	781.68		1916	457.847	2538.5												1899	1135.93	17.375		1961	-41.6842	936.684			2052	2497.39	501.474		2381	838.944	1065.78			1991	1611.58	32.7083		2202	729.5	634.201
	2101	1867.63	582.867		1917	662.407	2765.69												1900	665.8	-13.25		1962	422.571	10.5357			2053	18769.2	1122.98		2382	2235.89	503.868			1992	8372.19	805.21		2203	483.353	217.412
	2102	3677.75	3633.31		1918	298.571	8510.3												1901	2315.6	29.8026		1963	-9	702			2054	1516.5	154.5		2383	1977.5	82			1993	664.092	1368.12		2204	488.118	498.013
	2104	2081.55	493.475		1919	4012.06	10582												1902	39.9375	2.2875		1964	-76.3056	1657.11			2055	13841.6	885.389		2384	4285.88	2758.44			1994	2807.19	65.3125		2205	4973.71	1952.82
	2105	2036.68	6.04217		1920	738.731	4184.35												1903	466.522	-11.2941		1965	-103.5	3051.88			2056	2043	273.875		2385	1189.2	32760.1			1995	2325.62	-0.0852273		2206	2884.75	5014.12
	2106	1450	11490.4		1921	509.375	16714.7												1904	7.725	0.9		1966	-16.1974	595.526			2057	608.105	163.474		2386	3185.62	3264.58			1996	3145.71	217.605		2207	1276.3	865.342
	2107	1754.35	434.87		1922	825.75	10237												1905	1267.11	-15.125		1967	-82.75	3899.05			2058	1610.22	115.778		2389	5369.3	1576.2			1997	171	52		2209	2384.77	1244.53
	2108	901.425	83.9		1923	1848.92	10046.4												1906	748.125	-12.6875		1968	-20.375	622.194			2059	2564.01	177.926		2391	2841.33	1878.5			1998	2782.12	129.712		2210	436.111	8454
	2109	1366	1821.95		1924	599.167	9938.61												1907	143.105	-0.385417		1969	-106.829	1876.05			2060	11563.1	4796.82		2393	2167.67	350.667			1999	1312.5	28.875		2211	446.887	291.596
	2110	174.148	10883.8		1926	3462	12588												1908	75.625	-8.575		1970	-28.1	3576.07			2061	728.37	529.152		2395	352.029	114.059			2000	2256.61	152.722		2212	374.87	10529.9
	2111	2335.65	1392.15		1927	484.69	1656.33												1909	2085.41	-38.8636		1971	-49.035	7869.2			2062	1733.86	4493.21		2396	1793.99	266.199			2001	1185.72	-10.0556		2213	4377.66	2920.03
	2112	1158.7	891.078		1928	1000.26	4198.78												1910	532.042	-24.9167		1972	-2	684.632			2063	615.656	67.6719		2398	3493.72	1436.28			2002	20067.9	1329.91		2215	1618.64	1111.29
	2113	1114.35	268.465		1929	799.476	18282.3												1911	1.91667	-6		1973	387.783	117.349			2064	929.773	83.1937		2399	1067.07	295.592			2003	1352.06	122.762		2217	1555.65	1685.31
	2114	2667.88	2480.92		1930	2047.13	8731.04												1912	291.262	18.2875		1974	1424.7	75.6118			2066	36789.8	2076.15		2402	2992.9	807.318			2004	6459.36	2381.91		2219	1022.82	580.427
	2115	4593.25	1380.66		1931	640.5	12799.8												1913	1034.62	-35.25		1975	-13.9943	909.699			2067	1097.17	172.375		2403	1202.72	6081.8			2005	563.478	-23.3088		2220	679.457	2039.29
	2117	3618.34	881.05		1932	1942.97	11454												1914	765.325	89.675		1976	1592.49	137.579			2069	998.151	66.7703		2404	4991.9	659.885			2006	13048.6	900.944		2221	1206.78	3096.79
	2118	1027.59	436.762		1933	1932.42	7734.51												1916	654.417	-17.3472		1978	-0.5	689.566			2070	3534.55	142.355		2405	284.435	23998.9			2007	2205.79	299.632		2222	4899.65	1890.57
	2119	1157.36	460.819		1934	895.483	21647.7												1917	432.769	-62		1979	-17.9583	1086.21			2072	2620.17	1059.35		2408	1031.17	5383.97			2008	636.931	342.486		2223	2986.8	1366.16
	2121	1161.25	1722.27		1935	1086.71	47516.3												1918	207.5	-12.375		1980	46.995	3207.73			2073	1383.38	86.3333		2409	3535.12	102.295			2009	576.806	-6.63194		2224	1878.74	771.92
	2122	1208.5	656.443		1936	411.786	35158.3												1919	0	0		1981	-165.12	7005.13			2074	1125.57	-11.8684		2412	4664.44	533.167			2010	456.559	815.669		2225	1250.51	956.737
	2123	2687.35	30283.4		1937	1076.51	3207.46												1920	0	0		1982	-29.3421	1346.61			2075	441	4181.07		2414	7311.81	962.712			2011	1230.33	103.205		2226	2379.32	1118.55
	2124	1061.43	631.586		1938	1976.2	5903.61												1921	1206.67	-10.3333		1983	-24.3684	1161.95			2076	1784.61	147.667		2415	1704.02	14171.4			2012	1035.55	81.5733		2228	595.062	113.675
	2125	1230.75	234.767		1939	861.382	53422.4												1922	1376.42	97.1053		1984	-5.01974	1196.89			2077	2252.78	86.1389		2416	3295.11	615.427			2013	980.382	-20.7059		2229	785.637	190.613
	2126	1337.84	429.531		1940	2403.12	10236.4												1923	12.3438	-7.96875		1985	15.9079	1132.57			2078	940.158	146.421		2417	137.481	16511.8			2014	763.199	32.6471		2230	836.639	524.775
	2127	2510.85	247.62		1941	1825.37	5786.59												1924	210.5	-35.6875		1986	603.263	1254.63			2079	2553.67	101.579		2418	2757.94	0.9375			2015	2655.35	483.586		2231	3911.46	1364.8
	2128	-56.9483	22072.6		1942	1069.59	2803.79												1925	11.375	-28.1625		1987	605.158	354.632			2080	6967.51	9507.87		2421	2818	192.25			2016	1137.58	33.9841		2232	1297.61	437.691
	2130	1827.64	601.163		1943	1107.66	4633.97												1926	1253.06	21.375		1988	885.088	53.2059			2081	1758	-2.125		2422	1077.17	298.182			2017	3269.37	156.526		2233	1336.14	847.235
	2131	2624.53	475.021		1944	625.688	6157.42												1927	895.862	0.348684		1989	1870.24	45.8088			2082	14540.4	1196.94		2423	3664.04	8406.67			2019	851.487	27.8684		2234	501	355.5
	2132	946.026	417.105		1945	2331.69	11459.8												1928	875.526	143.895		1990	-110.8	2585.72			2083	28787.8	1690.26		2424	4187.08	683.071			2020	23833.5	3463.38		2235	1881.11	656.895
	2135	1282.45	317.321		1946	2418.2	13928.5												1929	766	45		1991	39.7135	1837.2			2084	3976.89	428.071		2427	1054.75	351.697			2021	4988.05	492.896		2236	3986.36	2340.2
	2136	2765.26	705.739		1947	460.15	12601.4												1930	25.1562	5.03906		1992	-14.5588	961.647			2085	1162.38	77.7647		2428	1517.43	101.714			2022	29363.1	1660.23		2237	1924.47	689.137
	2137	412.458	594.708		1948	1092.62	3675.23												1931	6.96429	-0.892857		1993	652.5	-5.375			2086	1096.9	73.9211		2429	645.987	2412.33			2023	591.531	1179.47		2238	1311.98	530.882
	2138	829.319	502.106		1949	1738.4	10519.4												1932	48.2727	-10.75		1994	-130.868	1900.64			2087	2876.8	206.403		2431	839.849	465.263			2024	939.647	-42.4485		2240	6125.22	2276.68
	2139	1258.21	13265.8		1950	4433.59	16588.8												1933	653.094	4.75		1995	999.033	30.9737			2088	647.941	66.4118		2433	729	248.5			2025	886.947	50.5263		2241	5525.48	1914.81
	2140	759.312	152.137		1951	2186.27	7394.05												1934	1024.84	22.5526		1996	-43.3478	1425.78			2089	1763.33	290.487		2434	808.89	3867.93			2027	10306.2	1689		2242	1016.86	790.307
	2142	1748.71	430.549		1952	593.4	2492.32												1935	1183.53	-3.78906		1997	-6.47368	961.421			2090	1235.61	99.4737		2435	679.904	9803.48			2028	584.265	258.576		2243	1542	405.047
	2143	4769	9151.69		1954	832.15	4509.09												1936	1426.31	-29.5417		1998	1593.32	46.0163			2091	2313.62	163.013		2436	4924.52	1180.56			2029	1747.73	311.25		2244	640.086	1142.3
	2144	4414.13	19008.4		1955	1470.92	5837.82												1937	1166.04	160.415		1999	-12.7632	2890.42			2092	16572.6	1529.36		2437	741.816	98.5067			2030	1801	488.5		2245	805.737	1001.66
	2146	3903.97	1268.1		1956	1766.74	7689.71												1938	5954.02	75.0521		2000	-68.1053	2558.5			2094	649.195	0.96875		2438	888.562	177.328			2031	1320.43	500.615		2246	1047.68	211.737
	2147	479.8	405.4		1957	2995.74	80873.9												1939	25.375	0.8125		2001	222.822	732.388			2095	1360.61	184.737		2439	5149.21	871.816			2032	1462.17	100.031		2247	555.588	643.324
	2148	1036.94	585.406		1960	680.087	14966												1940	927.111	17.0938		2002	-110.656	1792.99			2096	681.806	28.0833		2440	923.333	431.479			2033	892.431	52		2249	509.181	896.714
	2149	1030.03	205		1961	1525.35	10497.2												1941	68.5375	-1.76136		2004	-41.7303	912.836			2097	937.079	0.105263		2441	2182.47	135.474			2034	1404.79	264.982		2250	1610.57	390.586
	2150	3435	706.262		1962	762.887	2964.82												1942	759.105	15.0526		2005	458.618	76.4276			2098	1216.44	112.072		2442	4838.18	2999.38			2035	1016.87	51.7868		2252	519.138	191.88
	2151	405.835	547.835		1964	1738.18	25847.9												1943	873.324	-60.6471		2007	1421.37	78.0855			2099	3531.67	210.72		2443	1380.49	1166.05			2036	848	108.279		2253	189.951	6922.26
	2152	1037.8	251.962		1966	1058.46	3884.01												1944	-24.3	-1.8625		2008	2427.6	177.6			2100	5784.8	186.755		2444	4490.53	838.211			2037	1021.79	13989.9		2255	404.67	443.403
	2153	2568.98	796.594		1967	1883.09	6675.6												1946	30.3214	9.82143		2009	-12.7647	691.559			2101	814.132	187.132		2445	967.021	128.715			2038	2165.6	424.033		2256	4645.68	1254.33
	2154	1901.33	956.333		1968	960.714	3703.05												1947	792.604	63.0556		2010	-54.5263	1833.11			2102	677.85	53		2446	8005.23	1312.77			2039	1353.4	108.583		2257	2180.18	637.947
	2155	3600.39	1038.09		1972	1718.52	2091.33												1948	559.059	17.3529		2011	9.34211	949.342			2103	2842.93	295.75		2448	1926.32	351.579			2041	630.2	24206.7		2259	865	51.3333
	2157	1310.01	242.705		1973	1435.92	22944.7												1949	582.735	83.0147		2012	-50.6447	1672.32			2104	1766.12	176.822		2449	7684.03	1012.43			2042	20728.3	8919.92		2261	781.736	372.542
	2158	4828.25	3711.15		1974	1617.75	4937.76												1950	1028.74	61.4853		2013	1158.73	2.36029			2105	3639.5	874.875		2450	953.097	316.847			2043	8097.87	617.423		2262	3516.59	1230.47
	2159	1614.38	515.125		1975	263.562	10486.8												1951	8.125	-16		2014	-60.1053	3165.37			2106	15588.4	792.972		2452	682.533	840.961			2044	3314.28	320.03		2265	543.786	365.048
	2160	1023.05	933.364		1976	828.652	4284.38												1952	21.125	-17.375		2015	-25.1111	719.694			2107	984.619	30.4699		2453	3110.11	547.75			2045	3785.94	177.759		2266	4647.12	11124
	2161	2396.28	735.175		1977	981.38	6199.8												1953	627.625	-47.2014		2016	709.625	2.3125			2108	1340.53	-0.147059		2454	1618.65	99.5197			2046	621.105	95.1053		2268	5914.67	3116.81
	2162	426.915	4168.49		1979	734.191	784												1954	6.7907	3.73864		2017	1134.62	174			2109	4550.4	207.618		2457	1646.94	235.824			2047	7568.59	742.32		2269	1046.88	152.941
	2163	551.281	1044.23		1980	1035.96	17004.2												1955	1314.9	6.9375		2018	1046.78	127.095			2110	846.958	-29.4444		2459	575.595	11234.4			2048	384.73	10993.4		2270	499.458	157
	2164	710.77	93.4408		1981	2192.97	14627.5												1956	82.2059	7.21324		2019	874.75	155.75			2111	473.941	67.3529		2460	4573.09	3167.12			2049	785.775	-817.775		2272	1322.11	1906.68
	2165	1405.59	630.156		1982	349.179	10615.1												1957	817.618	92.6579		2020	1032.79	60.8421			2112	1330.08	64.0417		2461	26209.7	18428.6			2050	1612.12	-0.316901		2274	1000.5	375.831
	2166	1787.67	61181.3		1983	1897.12	6394.69												1958	57.1194	0.308824		2021	-123.656	3205.11			2115	871.059	-22.9632		2462	1065.1	174.23			2051	-73.4773	352.75		2275	384.625	5516.13
	2167	1094.12	44529.3		1984	1931.17	41103.4												1959	669.789	-5.84211		2022	1676.16	24.96			2116	5745.87	-31.5		2464	1365.7	171.118			2052	4804.14	542.035		2276	489.809	137.599
	2169	2161.06	717.354		1985	1143.56	14255.7												1960	171.575	-10.6		2023	1758.45	79.9265			2118	3032.92	120.645		2468	16217.6	2215.8			2053	796.059	-34.5921		2277	617.132	435.046
	2170	938.818	573.182		1986	1159.87	5396.66												1961	721.602	26.3155		2024	1411.72	48.2778			2119	1882.76	129.279		2469	1877.72	142.23			2055	724.975	-39.1582		2278	767.132	2839.55
	2172	1183.5	105		1987	2757.61	37288.4												1962	1014.36	10.0556		2025	692.75	12.6397			2120	1191.66	3580.43		2470	1423.25	223.083			2056	1454.28	249.579		2279	525.31	16278.2
	2173	3632.86	327.714		1988	926.859	4841.26												1963	81.575	-13.175		2026	-33.7632	1214.79			2121	783.569	407.056		2473	7026.99	3746.21			2057	1750.95	113.346		2280	1335.14	-31.4634
	2174	921.379	3084.78		1989	2391.97	60773.9												1964	760.377	22.3472		2027	471.5	-18			2122	3803.6	344.292		2474	950.581	304.103			2058	1335.82	329.043		2281	6399.98	2799.97
	2175	942.856	2713.11		1990	549.021	1758.22												1966	1077.14	0.157895		2029	1022.97	40.7063			2123	833.684	37.0921		2475	887	26588.7			2059	27054.6	1712.27		2282	1300.16	3352.53
	2176	1093.05	920.188		1991	1551.56	7430.02												1967	79.95	-4.0375		2030	-50.3618	1725.7			2124	5708.35	437.76		2476	908.844	175.281			2060	2876.47	154.895		2284	989.118	253.934
	2177	788.132	98.8		1992	594.925	1915.84												1968	1932.56	7.49306		2031	-37.4474	889.579			2125	6236.22	408.723		2477	585.632	459			2061	4299.69	254.696		2285	727.688	-81.125
	2178	1628.98	878.387		1993	881.773	10769.7												1969	733.651	13.1842		2033	-35.7171	862.724			2126	6991.24	502.572		2478	4056.77	419.021			2062	903.938	99.6268		2286	2808.44	1547.18
	2179	2143.1	442.9		1995	1365.22	3830.39												1970	7.1	-2		2034	3399.36	378.579			2127	670.029	52.0074		2479	715.979	742.646			2063	2730.61	91.2667		2287	2165.04	3746.25
	2180	1268.73	269.04		1996	659.663	1623.85												1971	869.322	-65.25		2035	-71.2632	1733.78			2128	8659.67	623.612		2480	2011.2	617.648			2064	1848.66	137.534		2288	4691.71	1346.03
	2181	513.163	403.631		1997	599.444	10813.7												1972	2151.15	95.4063		2036	-35.9868	2917.41			2129	1561.85	916.337		2481	574.015	13.5588			2065	2106.42	111.607		2290	715.785	186.375
	2182	716.511	542.835		1998	747.194	45670.4												1973	0	0		2037	1103.64	-48.0724			2130	1051.56	3039.34		2482	832.375	102.688			2066	5901.56	508.521		2291	7293.25	2760.56
	2183	2876.52	6117.33		1999	1025.73	5312.09												1975	-132.475	-12.825		2038	-1.58523	1313.72			2131	758.594	21.125		2483	1165.42	142.363			2067	1550.86	354.964		2292	141.925	9629.63
	2184	828.956	514.975		2000	1263.27	29683.6												1976	583.812	87.5625		2039	5785.28	115.55			2133	5164.42	401.02		2486	1117.22	23198.1			2068	809.428	54.4013		2293	485.115	16357.9
	2185	1645.34	1154.62		2001	1494.78	51747.3												1977	115.435	-23.7391		2040	4397.16	165.178			2134	1320.62	30.25		2487	737	1095.38			2069	589.083	386.125		2294	1661.18	2404.03
	2187	518.844	7243.21		2002	4181.77	21529.6												1978	2915.34	8.51705		2041	-63.9276	3105.66			2135	969.118	67.9412		2488	2183.07	201.602			2070	1878.26	93.3158		2295	1344.83	1204.85
	2188	952.763	338.75		2004	2042.12	37990.1												1979	1076.78	-17.1912		2042	939.178	93.7105			2136	1313.83	174.862		2489	1069.95	80.6875			2071	9083.14	1317.87		2296	2074.24	2214.6
	2189	2357.12	1041.24		2005	621.154	5532.27												1980	397	4.75		2043	-21.3611	1287.24			2137	2810.92	160.833		2491	1288.04	125.395			2072	2107.66	599.242		2297	2612.77	21853.4
	2190	1561.41	577.837		2006	2487.43	13987.6												1981	1276.18	15.5882		2044	-280.569	10437.7			2138	5371.53	448.25		2493	804.18	314.141			2073	3408.44	431.661		2298	504.773	15206.9
	2191	3128.42	4860.24		2007	660.114	25029.3												1982	808.6	7.4		2045	-47.7	2417.1			2139	1003.86	96.4531		2494	591.329	445.026			2074	10485.9	1167.68		2301	461.949	321.119
	2192	983.625	1593.12		2009	3455.73	5072.77												1984	1167.58	106.944		2046	-57.54	1615.82			2140	739.947	-34.4737		2496	939.085	23150.2			2075	4063.91	319.277		2303	1831.9	886.18
	2193	1670.28	214.169		2010	1058.3	3438.52												1985	8.6375	-31.2125		2047	1023.09	61.0903			2141	1442.45	149.974		2498	1852.29	-64.4934			2076	3307.95	274.84		2304	340.956	122.294
	2194	678.21	438.875		2011	854.226	39945.8												1986	504.971	-41.8529		2048	-92.976	4842.88			2143	955.719	121.719		2499	3079.67	3072.89			2079	1577.72	128.59		2305	975	152.563
	2197	918.258	29051		2012	1303.87	10440.4												1987	925.994	-69.375		2051	3187.18	272.227			2144	1169.06	79.6338		2500	558.151	347.296			2080	3465.53	244.816		2306	2974.2	1382.89
	2198	1122.29	57.6667		2013	1021.6	2776.07												1988	3528.51	106.456		2052	-29.5789	1844.34			2145	1431.94	519.375		2501	850.263	7742.37			2082	1368.27	64.6585		2308	926.8	31351.5
	2199	2008.65	1182.74		2014	2659.7	2609.67												1989	859.513	0.947368		2054	17.267	960.682			2146	2446.95	188.039		2502	440.672	8890.68			2083	2691.54	256.368		2309	558.224	210.691
	2200	1884.5	1071		2015	1595.39	7854.95												1990	1311.25	36.5		2055	56.8462	-2.0125			2147	3162.89	257.026		2504	1234.31	79.4514			2084	2540.56	30.2102		2310	2767.98	1538.46
	2201	1915.5	368.17		2016	816.74	3227.71												1991	83.1974	-1.225		2056	-31.3355	1354.93			2148	2542	200.52		2505	3264.11	450.211			2085	1072.25	62.0635		2311	723.829	2750.71
	2202	1673.19	461.5		2017	1777.92	48636.9												1992	493.462	26.1375		2057	-42.3553	2815.63			2150	1134.04	5107.04		2506	13326.6	5218.96			2086	1343.66	104.136		2312	475.406	9873.53
	2203	1785.41	1302.66		2018	1369.43	27331												1993	498.955	18.6618		2058	507.029	18.4118			2152	2603.73	-196.091		2507	1638.59	281.235			2087	763.901	40.1382		2313	647.066	444.396
	2204	528.085	16396.1		2022	656.964	22685.1												1994	594.93	-32.1406		2059	4416.34	364.243			2153	1112.19	8.27703		2508	1245.75	1912.72			2088	1168.44	17.1667		2314	1525.34	642.263
	2205	3199.96	1134.36		2023	2015.08	47458.4												1995	2400.47	-8.5		2060	-13.5294	869.529			2154	1489.82	280.026		2510	857.812	17870.6			2089	7555.1	250.875		2315	887.039	300.627
	2207	3675.46	2541.53		2024	2301.45	4409.89												1996	835.493	69.2647		2061	-34.0972	920.868			2156	1171.85	30.8403		2511	1474.5	399.5			2090	1496.42	62.1549		2317	12836.5	3622.21
	2208	2968.12	1131.61		2026	4805.3	22513												1997	2675.41	204.136		2062	-48.2895	1294.17			2157	2565.27	390.737		2512	1676.32	264.063			2091	1571.08	106.026		2318	1035.46	294.257
	2209	2206.24	782.473		2028	644.453	6981.42												1998	1323.11	56.4722		2063	54.3421	1096.7			2158	2232.55	120.526		2513	21297.5	2573.66			2092	1905.77	257.224		2320	771.842	1039.79
	2210	1251.88	399.594		2029	1314.79	76.875												1999	537.25	-38.4875		2064	19.2222	19422.2			2159	869.678	36.2368		2514	16359.8	4930.3			2093	3567.26	11.5329		2321	518.471	205.676
	2211	1733.76	623.382		2030	518.542	2134.71												2000	653.387	-3.2375		2065	1269.2	66.6184			2160	5541.66	662.074		2515	886.194	43.6528			2094	3589.03	410.513		2322	447.059	281.941
	2212	624.406	412.812		2031	174.875	14504.8												2001	1287.76	-34.6625		2066	20.8947	832.684			2161	1549.83	96.4531		2516	381.923	6190.85			2095	2405.74	-299.72		2323	870.875	1840.12
	2213	3824.25	1775.12		2032	3335.56	21596.4												2002	10.5	-23.5		2067	5555.16	481.234			2162	1633.17	119.5		2518	574.395	564.401			2096	1748.22	16.7895		2324	1604.67	125.108
	2214	1721.39	420.011		2033	2498.61	13743.2												2003	530	-92.6618		2068	-38.9783	2755.87			2163	1372.33	87		2519	951.176	46.5882			2098	501.694	125.778		2325	2022.75	1169.93
	2215	1408.26	274.804		2034	75.1779	6232.67												2004	0	0		2069	-53.25	1223.75			2164	1269.21	92.0735		2520	1321.5	110.224			2099	6494.93	-31.4		2326	781.941	142.765
	2216	1377.81	1807.38		2035	938.306	4040.42												2005	1555.69	15.45		2070	-44.9583	1524.32			2165	1108.78	-6.11184		2523	1238.7	650.222			2100	752.059	48.9851		2328	364.632	220.947
	2217	584.5	350.562		2036	1417.92	8191.19												2006	870	-19		2071	-73	1749.03			2166	953.5	77.7266		2524	2431.88	1084.72			2101	654.611	10428.7		2329	756.958	31474.9
	2218	665.414	423.566		2037	863.984	42016.4												2007	5.13636	-27.6818		2072	-40.745	1595.01			2167	1543.25	22		2525	869.809	321.421			2102	1973.3	59.0789		2331	6532.59	6305.12
	2219	1025.42	551.705		2038	346.033	15014.7												2008	493.891	-20.4844		2073	-3.77941	628.794			2168	10353.1	795.76		2526	2801.36	2059.57			2103	476.1	119.8		2332	798.385	6298.15
	2221	1193.06	371.313		2040	2896	7142.63												2009	396.96	-26.4145		2074	2130.69	36.625			2169	750.185	32644.3		2527	824.316	152.842			2104	1375.8	-53.8228		2334	401.493	1455.28
	2222	2796.1	1328.42		2041	736.255	5013.39												2010	562.693	14.5		2075	2103.03	-2.2			2170	829.105	105.559		2528	885.456	97.9044			2105	784.25	118.375		2335	806.913	3005.61
	2223	3650.05	610.42		2042	405.077	8695.85												2011	719.525	48.7062		2076	1740.76	-9.75694			2171	63484.1	3614.26		2531	2863.81	280.599			2106	5598.2	71.22		2336	635.5	476.506
	2224	1060.54	52.875		2043	348.606	20161.9												2012	469.75	-34.8558		2078	-9.82237	1350.62			2172	14061.3	974.345		2532	1563.13	3729.21			2107	1024.91	-3.03125		2337	798.533	4069.5
	2225	773.812	384.481		2044	1316.65	5257.82												2013	24.1136	2.76705		2079	-15.5658	640.303			2173	20080.9	1312.13		2534	1798.51	455.648			2108	892.236	52.6875		2338	866.368	314.895
	2226	4004.61	1170.86		2045	765.442	3031.84												2014	1235.11	11.3158		2081	-91.0833	2157.23			2174	2171.75	655.345		2536	1231.25	298.5			2109	938.905	37.4286		2340	867.681	273.169
	2227	2246.13	414.043		2046	709.407	22479.2												2015	707.333	114.5		2082	-12.8478	1191.02			2175	2120.25	163.83		2537	3020.07	678.178			2110	915.618	90.3816		2341	3557.3	1186.55
	2228	809.068	242.864		2047	1071.8	8433.35												2016	552.234	-60.2969		2083	-26.4402	1409.73			2176	780.281	58.75		2539	1067.36	8710.32			2111	14731.7	655.778		2343	926.663	3237.89
	2229	2180.28	1786.5		2049	1100.95	4975.06												2017	80.7407	4.42857		2084	-52.4474	1333.5			2177	2088.93	19.7171		2540	754.972	2583.36			2112	3663.15	122.224		2345	1644.68	1892.15
	2231	1058.79	148.864		2050	289.06	12385.5												2018	1007	-10		2085	212.211	836.789			2178	3704	624.5		2541	1142.78	316.444			2113	1206.38	211.105		2346	367.5	8829.62
	2232	2408.45	803.475		2051	866.609	3444.22												2019	173.275	12.1		2087	-19.9211	728.118			2179	1475.3	119.5		2543	1177.48	5510.02			2114	22584.2	1750.48		2347	654.125	299.75
	2233	573.511	1428.4		2052	1158	11558.1												2020	634.699	-11.5221		2088	33.4375	779.778			2180	930.5	85		2544	840.901	240.704			2115	11890	338.854		2349	1543.11	433.822
	2234	1818.59	698.527		2053	3058.03	9588.19												2021	833.651	215.141		2089	1396.84	126.785			2181	3966.41	196.316		2545	3112.11	355.158			2116	10348.4	985.308		2350	2279.28	1331.27
	2235	2415.93	876.125		2054	2802.38	14905.4												2022	0	0		2090	631.703	78.2031			2182	1097.09	36.8125		2547	3967.05	2955.32			2117	3245.89	317.132		2351	1279.54	611.603
	2237	177.458	6491.24		2055	3353.48	18199.9												2023	518.627	-11.7941		2091	172.038	10942.2			2183	1227.2	66.3203		2549	1330.82	4826.39			2118	1072.19	187.309		2352	1833.74	467.25
	2238	893.541	366.366		2056	625.775	2555.66												2024	22.7216	-6.84659		2092	9.26087	1420.43			2184	6566.99	511.98		2550	977.947	-24.24			2119	2409.91	-144.913		2354	900.229	168.312
	2239	806.587	528.937		2057	2123.55	30605.6												2025	9.6875	-22.875		2093	-53.64	1589.79			2186	615.764	92.5139		2551	977.588	170.191			2120	3134.75	35.6667		2355	858	309.375
	2241	1071.72	387.225		2058	321.056	13855.8												2026	814.143	49.619		2094	3728.31	492.56			2187	2141.89	850.5		2552	333.167	8492.83			2121	637.875	105.097		2356	653.875	24967.8
	2242	910.225	232.375		2060	1769.22	10685.5												2027	82.75	-0.5		2095	1588.03	233.125			2188	4728.05	347.663		2554	1373.12	1617.5			2122	1848.12	1695.3		2357	5814	1411.87
	2243	959.861	450.333		2061	2164.57	6578.85												2028	652.7	41.1125		2096	107.25	11984			2189	1070.21	-2.04861		2555	1224.38	299.171			2123	848.5	16.75		2358	5202.7	6396.84
	2244	1769.67	3337.72		2062	1270.75	7522.67												2029	637.546	46.0658		2097	-37	1202			2190	976.224	33.9868		2556	562.986	314.278			2124	4379.48	508.888		2359	2487.39	1348.07
	2245	2392.45	2651.89		2063	372.636	22940												2030	-62.0128	-9.775		2098	1521.77	330.73			2191	537.979	19.2083		2557	2950.6	288.168			2125	1091.81	4.14286		2361	851.069	11264.2
	2246	808.432	1683.54		2064	493.1	5225.82												2033	1231.29	51.6667		2099	2	1054.18			2192	1685.65	61.5625		2559	637.658	162.526			2126	6412.16	252.048		2362	2099.25	801.987
	2247	3045.28	928.613		2065	926.154	3095.23												2034	1030.81	57.625		2100	243.472	58.2361			2193	2106.94	89.381		2561	3483.75	613.875			2127	3326.55	186.25		2364	238.908	5269.61
	2248	3020.4	1961.2		2066	698.25	7408.06												2035	5399.5	171.75		2101	822.474	58.2105			2194	12275.5	905.817		2562	686.5	86			2128	1051.56	-94.0833		2365	2047.95	1678.97
	2250	1825.35	837.739		2067	866.67	3375.07												2036	10.9489	3.53409		2104	-27.0435	1248.19			2195	6857.53	341.052		2563	530.875	382.875			2129	1910.39	71.7895		2366	9017.59	3733.31
	2251	1050.99	551.83		2068	2517.9	22202.5												2037	612.406	-55.4688		2105	-29.6184	892.816			2196	1267.72	229.278		2565	2525.63	350.21			2130	1945.73	113		2367	545.362	160.447
	2253	797.804	169.272		2069	696.375	4751.65												2038	97.8333	-29		2106	-71.5132	2367.74			2197	1994.97	150.861		2566	1105.89	258.208			2131	1572.89	15.7368		2368	3359.2	8085.1
	2254	1391.38	308		2070	891.287	1595.09												2039	105.713	2.55		2108	-34.29	3679.84			2198	3064.09	184.522		2567	2940.36	826.88			2132	1418	42.5789		2369	1263.03	948.73
	2255	1474.01	554.359		2071	1219.58	18933.2												2040	20.7589	5.8125		2109	-78.5312	3235.12			2199	1158.94	-33.5417		2570	3651.11	430.79			2133	2664.82	158.408		2371	502.362	137.474
	2256	749.6	174.881		2072	631.789	2635.33												2041	-194.214	2179.93		2110	543.971	21.4559			2200	1081.37	125.145		2571	8783.98	255.093			2134	832.717	136.77		2372	989.316	469.44
	2257	971.4	411.6		2073	812.1	26853.2												2042	925.806	14.7361		2111	775.062	814.125			2201	13378	915.24		2572	22187.2	14278.3			2135	551.965	274.931		2373	1577.08	1024.18
	2259	4855.17	1974.14		2074	1985.75	23232.6												2043	1028.43	29.9474		2112	-102.895	1648.69			2202	2356.05	259.429		2575	313.276	6036.62			2136	1423.1	-4.08125		2374	254.722	16480.2
	2260	2097.5	613.437		2076	370.942	11664.6												2044	444.205	-10.9		2113	-72.9091	1408.25			2203	1235.03	206.083		2576	1128.75	221.458			2137	748.125	187.143		2375	1490.33	677.714
	2261	965.506	267.733		2077	1786	12676.1												2045	178.887	29.7375		2114	1043.23	117.776			2204	1060.1	43.2569		2579	1800.88	301			2138	644.801	856.489		2377	742.966	3686.45
	2262	1266.14	279.734		2079	1262.62	8895.13												2046	771.44	31.3393		2115	719.094	-1.125			2205	1812.67	1229.71		2581	3103.66	612.245			2139	838.469	81.8438		2379	503.425	179.897
	2264	4491.21	2596.96		2080	2787.19	36188.4												2047	992.529	76.5809		2116	15.3421	630.289			2206	772.11	51.4926		2583	2575.85	286.659			2140	1231.75	218.062		2380	1204.45	658.743
	2265	1013.24	16866.4		2081	1107.1	3178												2048	1586.05	172.329		2117	835.737	55.0526			2207	2519.8	-9.74405		2585	964.312	102.417			2141	1901.62	115.223		2381	6927.34	10210.7
	2266	1471.89	1438.92		2083	750.3	1559.23												2049	580.08	25.9211		2118	698.909	399.727			2208	855.75	90.2891		2586	3490.07	478.705			2142	4394.2	474.197		2382	918.362	304.507
	2267	1190.81	39220		2084	986.779	7126.9												2050	786.191	28.1908		2119	4473.5	24			2209	5944.58	422.033		2587	2307.18	986.658			2143	494.375	1785.72		2383	2171.08	1492.78
	2268	575.65	413.075		2085	989.556	4461.19												2051	1100.07	176.25		2120	-100.75	3656.88			2210	1439.58	24.1944		2588	5345.16	538.211			2144	3139.25	285		2384	2020.82	893.149
	2270	1639.88	1327.73		2086	271.51	10762.9												2052	14.45	-2.45		2121	713.737	70.5263			2211	1902.32	225.227		2589	220.074	8686.35			2146	4179.5	433.318		2385	537.77	359.953
	2271	3833.13	702.293		2087	784.438	4632.79												2053	657.054	40.4559		2122	23.1316	-24.875			2212	1171.91	132.031		2590	1356.36	275.75			2147	5036	203		2386	956.381	479.289
	2272	1228.04	732.725		2088	342.071	25324.9												2054	31.2708	-1.77083		2123	-45.1014	901.105			2213	15705.7	1218.44		2592	2010.99	317.409			2148	3088.03	145.934		2387	839.316	293.703
	2273	1538.97	240.944		2089	3937.41	10212.8												2055	576.5	7.125		2124	-98.3026	2557.17			2214	1189.54	64.0208		2593	2244.05	17480			2149	2073.53	105.528		2388	819.602	706.875
	2275	2792.22	723.188		2090	1160.97	6539.04												2056	818.042	62.7262		2125	743.181	113.833			2215	1274.22	9.58553		2594	2807.97	460.69			2150	475.266	159.172		2389	6938	10225
	2276	-115.787	7385.99		2091	663	1606.51												2057	2063.35	41.9		2128	18.6711	675.954			2217	1703.74	198.83		2596	824.487	166.987			2153	2076.27	218.886		2390	2939.5	1724.02
	2278	465.571	537.143		2092	590.946	2094.19												2059	56.0086	-0.725		2129	1086.94	75.2794			2218	2507.6	233.651		2597	2835.05	761.613			2154	2925.25	233.026		2391	1833.57	1512.22
	2279	2822.08	1708.62		2093	484.465	8865.64												2060	14.3182	-4.43182		2130	5.25	687.167			2219	5367.11	357.5		2598	2158.49	1064.95			2155	1040.78	6127.76		2392	37.32	7696.06
	2280	3222.58	1487.3		2094	1049.29	4667.56												2063	689.3	-7.46875		2131	2704.23	140.12			2220	1537.19	570.667		2599	878.583	15076.3			2156	20435.6	1188.24		2393	790.667	307
	2281	601.833	174.5		2096	-529.6	13338.7												2064	650.879	25.0547		2132	-27.8088	524.272			2221	5384.65	418.763		2600	3993.82	3622.25			2157	654.132	50.2569		2394	1726.65	150.259
	2282	1016.96	1300.51		2097	2209.41	8535.57												2065	874.363	9.7		2134	-95.6552	7020.29			2223	738.775	78.8		2601	2724.39	859.63			2158	1883.84	161.261		2395	4851.42	1419.63
	2283	1422.45	7715.04		2098	3410.3	16792.2												2066	936.9	-22.1875		2135	696.2	0.2			2224	899.875	26.1875		2602	520.389	454.25			2159	976.889	230.592		2396	643.789	2025.24
	2284	758.073	759.089		2099	663.177	2609.78												2067	22.875	-3.1		2136	733.988	-6.20625			2225	2576.32	174.855		2603	536.728	-37.7059			2160	969.125	124.5		2397	1062.53	632.405
	2285	822.601	203.232		2101	1089.71	2767.95												2068	685.224	44.9342		2137	1412.48	6.6875			2226	4527	114.721		2604	4373.25	466.583			2161	9524.38	1296.59		2398	5017.88	1254.55
	2286	998.756	65.8063		2102	151.885	12262.2												2071	618.027	-11.25		2138	1720.56	464.789			2227	834.597	62.0694		2605	898	245.882			2162	1045.93	140		2399	721.75	22185.5
	2287	530.819	-196.925		2103	3176.5	31846.1												2072	1612	46.3158		2139	-65.7031	1306.73			2228	1760.58	134.771		2606	5371.88	783.342			2163	1731.1	142.395		2400	2434.9	1260.42
	2289	912.947	153.704		2104	1089.2	3611.01												2073	-2.36364	-6		2140	810.132	53.3421			2229	4033.8	332.118		2607	323.067	11967.4			2164	937.263	99.5921		2401	325.319	18252.1
	2290	1030.36	145.647		2105	644.462	11668.2												2074	5809.01	39.2228		2142	-130.037	4657.99			2230	847.492	85.3594		2609	4874.53	954.766			2165	2220.03	69.0333		2403	12286	6633.69
	2291	2673.25	478.033		2106	1865.73	35542.5												2075	1636.82	58.3421		2143	-55.5	1020			2231	991.062	19418.2		2610	14437.6	2371.81			2166	3963.31	815.4		2404	2058.86	771.297
	2292	2150.53	233.656		2107	5159.32	13952.2												2076	137	10		2145	1322.9	125.48			2232	1027.84	94.5312		2611	1411.96	21828.9			2167	7773.48	513.588		2405	1080.13	244.316
	2294	1058.07	795.631		2108	1858.14	6757.09												2077	905.868	-24.2059		2146	1044	45.5			2233	777.075	117.681		2612	5131.41	9329.98			2168	1116.49	55.0278		2406	8745.81	4978.35
	2295	448.014	210.833		2109	661.2	2352.11												2078	975.667	88.6667		2147	1855.14	234.762			2234	1760.65	9435.48		2613	1172.31	193.188			2169	1791.69	81.9583		2407	924.429	372.571
	2296	163.75	5048.8		2110	1444.11	5458.31												2079	-131.312	-24.6875		2148	617.25	118.398			2235	1336.65	20.5882		2615	6346.65	732.406			2170	3058.54	659.837		2408	814.281	304.5
	2297	417.724	1365.55		2111	1222.5	10578.5												2080	3503.52	49.5652		2149	31.5526	-0.763158			2236	959.618	100.824		2616	2227.12	775.182			2171	2246.94	177.875		2409	724.375	316.875
	2299	1046.7	6097.7		2112	865.964	31239.4												2081	533.719	7.82812		2150	15.8553	852.474			2237	1209.36	119.051		2617	541.765	188.588			2172	46810.9	7793.7		2410	591.35	5014.4
	2300	592.112	908.691		2113	1991	7152.97												2082	199.75	-24.75		2151	-50.0263	1006.34			2238	1812.86	56.3158		2619	3299.61	767.342			2173	2900.2	181.401		2413	475.115	9326.68
	2301	3666.75	1476		2114	1083.55	8270.24												2083	779.555	-0.40625		2152	-190.801	8727.93			2239	1515.92	-36		2620	1019.79	493.014			2175	1029.16	147.8		2414	1589.81	38067.3
	2302	999	450.359		2115	3170.39	80441.3												2084	5.375	-10.125		2153	-197.806	5137.75			2240	3988.54	669.489		2622	19426.2	2413.47			2176	813.75	213.41		2415	1095.95	1635.2
	2303	1758	364		2116	1210	4269.58												2085	1115.47	56.9812		2154	586.066	246.801			2241	565.316	108.368		2623	1217.62	50616.3			2177	882.854	179.079		2416	1685.21	1786.58
	2305	666.461	111.868		2117	2062.86	10393.3												2087	44.2391	1.47826		2155	-16.7105	1535.86			2243	1528.59	29.7083		2624	4356	859			2178	4592.44	429.411		2417	1005.09	255.075
	2306	461.587	1063.41		2118	1690.25	7050.5												2088	1015.3	29.4766		2156	-39.0526	2231.74			2244	2506.93	107.391		2625	383.836	14282.3			2179	3559.97	203.079		2418	2472.33	3183.67
	2307	1039.79	1377.82		2119	3306.3	63216.8												2089	1162.67	-66.2105		2157	-50.8947	1000.89			2245	1077.24	20.4276		2626	2950.63	563.667			2180	906.25	-177.536		2419	2940.2	1860.88
	2308	214.643	5973.29		2120	1665.43	35164.2												2090	945.75	46.7917		2158	-79.4013	1877.44			2247	2576.18	126.844		2627	1443.22	363.111			2181	2422.17	203.478		2420	3847.04	3201.38
	2309	1054.98	298.013		2121	356.34	11276.7												2091	1081.4	25.7917		2159	433.562	56.875			2248	2122.61	116.783		2628	270.875	13994.2			2182	779.594	101.75		2422	1619.65	458.888
	2310	3950.43	608.505		2122	785.56	3270.53												2092	852	83.5		2160	961.412	-1.0125			2249	5213.74	263.724		2630	890.465	184.181			2183	1352.24	51.5		2423	1067.68	422.303
	2311	3458.86	1145.87		2123	667.75	1939.11												2093	636.875	93.95		2161	-7.58824	474.412			2250	1018.58	50.1944		2631	700.927	4291.23			2184	811.059	-12.8382		2424	1236.85	332.58
	2312	845.977	270.25		2124	310.675	18194												2094	685.849	39.8947		2162	1.38816	703.066			2252	1018.78	120.833		2632	875.592	2076.01			2185	880.75	40.4531		2425	6222.15	1699.07
	2313	3765.94	663.083		2125	1140	22954.8												2095	629.792	39.7083		2164	13.125	3125.12			2254	908.125	-8.71053		2633	858.837	294.113			2186	948.164	11.3092		2426	628.702	5510.14
	2314	1054.35	588.05		2126	878.179	39358.3												2096	1344.25	64.25		2165	1005.63	0.736111			2255	4744.76	540.854		2634	3465.38	648.283			2187	1609.56	32.5395		2427	798.833	280.208
	2315	3737.69	1715.29		2127	2068.87	51771.2												2097	1083.12	53.0139		2166	-8.31579	833.474			2256	1585.17	77.6964		2635	5951.42	1428.8			2188	2885.88	309.625		2428	1664.85	692.167
	2316	784.214	192.324		2128	1404.24	2981.82												2098	463.275	5.92105		2167	-86	1513.18			2257	1294.16	43.3438		2636	435.922	98.0469			2189	1211.47	80.7812		2429	1584.76	884.346
	2317	640.303	36777.5		2129	270.269	13867.6												2100	649.566	96.1029		2168	1119.32	71			2258	1388.97	250		2637	1769	2307.08			2190	3092.27	111.924		2430	1414.42	322
	2318	2194.27	15086.6		2130	586.2	7703.35												2101	1094.91	130.031		2169	-193.04	6654.47			2259	2655.45	190.205		2638	1047.44	298.762			2191	1010.5	127.25		2431	5443.32	2943.76
	2319	448.625	142.229		2131	1250.03	4558.97												2102	9.5625	-3.60417		2170	-12.7171	928.632			2260	4537.53	917.091		2639	1172.66	1606.72			2192	288.743	1199.57		2434	760.658	653.8
	2320	792.481	3323.19		2132	807.846	3169.85												2103	1798.32	32.6176		2171	-62.1793	1776.45			2261	2046.3	187.625		2643	2184.4	426.724			2193	3682.69	1272.56		2435	1010.19	420.176
	2322	805.549	84.7817		2133	1199.6	34541.4												2104	240.571	27.375		2172	-31.4402	1273.95			2262	747.194	97.4306		2644	869.625	193.078			2194	2787.36	190.571		2436	790.944	517.833
	2323	1032.17	228.458		2134	1636.94	10039.7												2105	590.75	29.25		2173	-32.125	2002.44			2263	855.443	277.031		2645	2906.53	385.476			2196	1603.63	67.3		2438	2713.09	1450.82
	2324	3159.9	1011.65		2135	532.75	23756.8												2106	490.776	7.71053		2174	527	-26.0833			2265	2236.43	304.995		2647	1668.29	806.348			2197	1065.55	-5.13125		2439	886.615	9069.27
	2326	1059.86	552.453		2136	1083.7	4126.05												2107	363.675	-39.6875		2175	14.788	1655.2			2266	4172.86	146.7		2648	4790.06	707.719			2198	713.917	11.4167		2440	752.761	26488.1
	2327	650.987	116.519		2137	600.45	1784.75												2108	965.244	114.637		2176	1740.57	16.2105			2267	342.436	282.5		2649	1401.47	290.263			2199	823.816	81.5921		2442	1287.65	385.542
	2328	2537.69	3325		2138	474.569	23189.9												2109	66.0875	-12.05		2177	1331.19	48.75			2268	927.745	37.2375		2650	1631.16	6307.31			2200	841.154	142.132		2443	734.526	401.493
	2329	2307.87	414.781		2139	818.275	4340.13												2110	1350.86	-71.3026		2179	-14.2989	981.571			2269	797	30.8		2651	2992.52	4941.94			2201	1410.82	100.721		2445	7452.39	5803.14
	2330	949.842	218.3		2140	3288.77	12233.4												2111	547.778	16.7153		2180	-25.6974	1048.38			2270	1188.68	330.105		2652	553.842	2002			2202	1374.59	86.6316		2446	636.732	275.304
	2331	941.062	525.563		2141	711.486	1971.61												2112	1489.71	12.7083		2181	-49.8816	2415.45			2271	1316.18	18.0882		2653	4707.84	826.391			2203	1131.82	-11.8824		2447	2382.72	615.128
	2332	1197.43	1004.72		2142	1123.67	5096.4												2114	-15.0417	-10.6875		2182	5040.78	128.222			2272	3272.5	268.625		2654	5655.34	775.473			2205	3445.97	233.824		2449	1314.5	2388.26
	2333	3321.78	858.045		2143	1070.37	2632.26												2115	25.3352	-6.35227		2183	-2.57895	644			2273	1102.83	44.0438		2655	1503.8	2133.22			2206	686.5	169.947		2450	2978.09	1000.45
	2334	3247.99	838.598		2145	1863.31	5345.98												2116	731.11	25.9779		2184	-43.6319	1014.26			2274	6839.88	392.266		2657	24198.7	5856.31			2207	3601.17	117.341		2453	1257.19	132.162
	2336	2826.22	631		2146	931.575	7011.04												2117	693.381	-34.1094		2185	1299.88	5.875			2275	3579.62	227.507		2658	5979.87	1069.65			2208	1885.12	208.125		2454	559.756	9.12048
	2339	285.938	5561.37		2147	490.8	668.725												2118	958.934	2.17105		2186	-2.19737	1076.91			2276	4118.25	203.25		2659	1284.89	206.75			2209	961.242	-15.6917		2456	8680	2137.99
	2340	691.554	-205.054		2148	483.96	2100.84												2120	11.5455	-0.409091		2187	-26.8158	1867.39			2277	1730.92	117.333		2661	1052.34	118.64			2210	950.762	-0.097561		2458	517.413	7903.04
	2341	724.176	360.938		2149	669.667	14919												2121	1022.31	-31.1053		2188	2091.08	413.296			2278	1418.25	30.25		2662	1324.3	151.932			2211	1863.43	142.069		2459	6309.75	3298.38
	2342	2371.48	104.38		2150	2190.62	15427												2122	0	0		2189	946.049	30.7292			2279	1314	23.6338		2663	2137.9	119.91			2213	1093.93	88.1642		2460	967.164	241.092
	2343	338.776	5166.96		2151	2856.21	42625.7												2123	534.363	-15.125		2190	-66.3646	1425			2280	4797.41	165.237		2664	901.211	66.7368			2214	2087.71	34.2917		2461	586.704	1550.29
	2344	342.961	6229.16		2152	1067	2515.84												2125	13.5625	-10.875		2191	1402.36	69.2727			2281	1332.87	83.5208		2665	1214.51	120.187			2215	606.8	7367.74		2464	851.053	760.086
	2345	1127.2	220.526		2153	469.175	10821.2												2126	0	0		2192	889.875	44.5188			2282	1267.75	180.5		2666	7598.38	1036.75			2216	313.226	14322.1		2465	1111.12	1525.94
	2346	2069.55	505.525		2154	1631.5	5610.53												2127	1060.35	1.63235		2193	1337.66	132.676			2283	750.316	45.3456		2667	2429.11	440.474			2217	2736.7	36.087		2466	1172.34	620.186
	2347	1232.3	46658.9		2155	1562.92	6722.28												2128	100.706	3.23529		2194	3600.73	5.83			2284	923.047	153.172		2668	1093.83	155.171			2218	1249.05	42.4408		2468	862.411	1581.19
	2348	909.963	845.525		2156	1154.32	7452.5												2129	937.667	60		2195	-249.63	10341.3			2285	1780	66.2857		2669	816.521	267.639			2220	621.538	48.6923		2469	1263.14	1194.96
	2349	500.024	148.482		2157	704	2541.19												2130	250.625	-0.6875		2198	-165.2	4528.8			2286	6185.8	270.87		2671	4905.45	681.105			2221	2414.26	252.841		2470	1733.86	509.409
	2350	2562.6	953.56		2158	1099.59	24934.5												2131	560.889	8.55556		2199	-128.295	2436.4			2287	907.971	54.6765		2676	4309.47	807			2222	625.993	43.2434		2471	966.727	16847.6
	2351	1495.38	497.891		2159	2498.41	12128.2												2132	2006.61	35.1985		2200	976.972	136.583			2288	1684.57	156.857		2677	1731.31	302.653			2223	27513.2	3671.94		2474	501.445	225.344
[truncated: 7,427 more rows]
