# Supplementary material for: ATP and large signaling metabolites flux through caspase-activated Pannexin 1 channels
Source: eLife. 2021 Jan 7;10:e64787. doi: 10.7554/eLife.64787 (PMC7806264; doi:10.7554/eLife.64787)
Supplement: Figure 3—source data 1. [file elife-64787-fig3-data1.xlsx]

## Sheet: Sheet1
	Figure 3B Time Course of Representative Liposome SR-B Release							Figure 3 C Steady state change in normalized fluorescence intensity for SR-B (left) and GFP (right)														Figure 3D Time Course of Representative Liposome Rhodamine-B Release								Figure 3 E Steady state change in normalized fluorescence intensity for Rhodamine-B (left) and GFP (right)														Figure 3 F Rate of Dye Efflux (SR-B and RhB)

	Time (s)	Sulforhodamine B	GFP						Left (SR-B)								Right (GFP)					Time (s)	Rhodamine B	GFP							Left (Rhodamine B)								Right (GFP)					SR-B			Rh-B
	0	1.15507	0.994231					Panx1	+	+	+	+	+	-			Panx1	+	+	+		0	1.013	0.992199						Panx1	+	+	+	+	+	-			Panx1	+	+	+		Fraction of GFP Cleaved	-k (s-1) Sulforhodamine B		Fraction of GFP Cleaved	-k (s-1) Rhodamine B
	10	1.08489	1.00577					Casp3	+	+	+	-	-	+			Casp3	+	+	-		10	0.977489	0.997527						Casp3	+	+	+	-	-	+			Casp3	+	+	-		0.652004	0.0112		0.649289	0.00652
	20	0.888378	1.00577					Classification	(Cleaved)	(Uncleaved)	(NoPanx1)	(Uncleaved)	(NoPanx1)	(No Panx1)			Classification	(Cleaved)	(Uncleaved)	(Uncleaved)		20	0.977489	1.00285						Classification	(Cleaved)	(Uncleaved)	(NoPanx1)	(Uncleaved)	(NoPanx1)	(No Panx1)			Classification	(Cleaved)	(Uncleaved)	(Uncleaved)		0.209091	0.00574		0.366993	0.00204
	30	1.08463	1.00192						0.362517	0.17734	0.007364	0.088083	0	0				0.652004	0.021113	0.088083		30	1.04015	0.986872							0.589494	0.088346	0.082126	0	0.007472	0.006431				0.649289	0.006667	0.005348		0.663636	0.0133		0.402116	0.00209
	40	1.00067	1						0.491866	0.148907	0.003106	0.091537	0.041379	0.04769				0.209091	0.00277	0.091537		40	0.935716	1.00951							0.426136	0.055164	0.045455	0.012539	0.027203	0.009868				0.366993	0	0.002695		0.588525	0.00717		0.429543	0.00261
	50	0.944524	1.00385						0.347469	0.057031	0.030769	0.155963	0.000515	0.095308				0.663636	0.051111	0.155963		50	0.987932	1.01484							0.5	0.121094	0	0.020055	0.008089	0.006522				0.402116	0.030303	0		0.797129	0.04963		0.638323	0.00851
	60	1.08021	0.994231						0.514675	0.163424	0.012857	0.108721	0.045374	0.067823				0.588525	0.014599	0.108721		60	0.973312	0.996195							0.568627	0.070313	0.028025	0.020656	0	0.002227				0.429543	0.009174	0.009434		0.662162	0.0077		0.392196	0.00321
	70	0.986632	0.996154						0.414678	0.140584	0	0.092391	0.006349	0.036232				0.797129	0.042146	0.092391		70	1.11534	0.320967							0.394892	0.078125	0.027174	0.011423	0.029463	0				0.638323	0.010667	0.003407		0.368462	0.0096		0.933489	0.01623
	80	1.02406	1.00192						0.41425	0.020652	0	0.134328	0.004208	0.0625				0.662162	0.0125	0.134328		80	0.979578	0.314307							0.5	0.041096	0.023256	0.017621	0.007042	0.007519				0.392196	0.020513	0.023952		0.485366	0.01356		0.687849	0.00615
	90	1.07553	0.425						0.338924	0.027273	0.015	0.060071	0.073248	0.020301				0.368462	0.01387	0.060071		90	1.02762	0.302321							0.389151	0.011725	0.006024	0	0.011765	0				0.933489	0.019847	0.003607		0.5	0.00686		0.661736	0.01061
	100	0.953881	0.423077						0.402724	0.020045	0.008322	0.086022	0.039906	0.030668				0.485366	0.086266	0.086022		100	1.02971	0.295662							0.783742	0		0.014745	0.026759	0.003077				0.687849	0.012329	0		0.507692	0.01272		0.524596	0.0077
	110	0.888378	0.425						0.666321	0.096756	0.004042	0.128702	0.035639	0				0.5	0.047368	0.128702		110	1.00882	0.298326							0.637854	0.016667		0.001818	0	0.008759				0.661736	0.006211	0.034527		0.555556	0.01999		0.612648	0.00604
	120	0.80884	0.423077						0.459305	0.073555	0.02823	0.039405	0.021665	0.082071				0.507692	0.0625	0.039405		120	0.958691	0.304985							0.85	0.018478		0.014419	0.021459	0.000912				0.524596	0.02381	0.023945		0.566234	0.0137		0.203242	0.00228
	130	0.668477	0.432692						0.561043	0.162393	0.011385	0.110904	0.06682	0.023256				0.555556	0.009524	0.110904		130	0.92945	0.299658							0.747253	0.01662		0.010217	0	0.074016				0.612648	0.02027	0.015094		0.561528	0.01804		0.407087	0.00328
	140	0.682513	0.434615						0.535354	0.069971	0.020408	0.0887	0	0.026641				0.566234	0.095238	0.0887		140	0.86679	0.29433							0.771333			0.003831	0.013158	0.003963				0.203242		0.007752		0.676512	0.01622		0.446723	0.00466
	150	0.425182	0.423077						0.404916	0.131378	0.01464	0.1019	0.002732	0.031469				0.561528	0.011407	0.1019		150	0.739383	0.298326							0.567108			0.020732	0.027001	0.003311				0.407087		0.005629		0.866	0.0258		0.227528	0.00148
	160	0.546829	0.432692						0.389061	0.025413	0.05482	0.101761	0.025602	0.052331				0.676512	0.011299	0.101761		160	0.762358	0.299658							0.728608			0.014995	0.022526	0.004684				0.446723		0.015385		0.910569	0.043		0.346667	0.00276
	170	0.223995	0.430769						0.429317	0.07018	0.024444	0.129555	0.085957	0.082583				0.866	0.015587	0.129555		170	0.793688	0.312976							0.554098			0.009569	0.009018	0.002125				0.227528		0.008889		0.782609	0.02398		0.495495	0.00587
	180	0.209959	0.421154						0.4329	0.08869	0	0.038095	0.075941	0.04065				0.910569	0	0.038095		180	0.687166	0.327626							0.322034			0	0	0.002211				0.346667		0.001883		0.621302	0.01643		0.550388	0.00906
	190	0.191244	0.423077						0.425422	0.124273	0.007782	0	0.030249	0.038961				0.782609	0.010327	0		190	0.791599	0.29433							0.56821			0.009479	0.015407	0.018667				0.495495		0.007634		0.691275	0.01415		0.609195	0.00684
	200	0.102348	0.421154						0.674884	0.201502	0.005848	0.114094	0.061594	0.048544				0.621302	0.003984	0.114094		200	0.82084	0.311644							0.826357			0.004841		0.005882				0.550388		0.002871		0.378947	0.01484		0.530233	m
	210	0.116384	0.426923						0.485714	0.14922	0.00103	0.107366	0.024211	0.031469				0.691275	0.013158	0.107366		210	0.69761	0.32363							0.490132			0.007241		0.010045				0.609195		0.004739		0.4	0.00656		0.442105	0.00884
	220	0.191244	0.428846						0.66499	0.181718	0	0.122776	0.06658	0.015152				0.378947	0.011538	0.122776		220	0.795776	0.322298							0.77565			0.009709		0.004401				0.530233		0.007865		0.243187	0.00375		0.573333	0.00679
	230	0.179596	0.438462						0.707358	0.252001	0.008607	0.157774	0.092527	0				0.4	0	0.157774		230	0.751915	0.304985							0.666667			0.060948		0.005249				0.442105		0.020113		0.617225	0.01543		0.732394	0.01173
	240	0.146845	0.425						0.562763	0.13725	0.034911	0.048295	0.021438	0.042373				0.243187	0	0.048295		240	0.695521	0.318303							0.640625			0.013006		0				0.573333		0.005148		0.546752	0.01072		0.503356	0.00507
	250	0.179596	0.419231						0.512367	0.189371	0.028532	0.09871	0.027732	0				0.617225	0.017341	0.09871		250	0.672546	0.29433							0.606557			0.01233		0				0.732394		0		0.443709	0.00566		0.622951	0.00787
	260	0.151524	0.428846						0.691498	0.107264	0.032564	0.075388	0.026846	0.033624				0.546752	0.007368	0.075388		260	0.695521	0.302321							0.68655			0.003205		0.010767				0.503356		0.030252		0.479675	0.01378		0.581818	0.00703
	270	0.231063	0.413462						0.726804	0.115317	0.08655	0.139344	0.05814	0.025046				0.443709	0.030899	0.139344		270	0.655837	0.304985							0.607623			0.018841		0.006897				0.622951		0.023762		0.675313	0.01579		0.550781	0.00923
	280	0.142166	0.426923						0.626305	0.08583	0.038692	0.092369	0	0.044248				0.479675	0	0.092369		280	0.649571	0.292998							0.713643			0.013661		0.014041				0.581818		0.014859		0.702918	0.01223		0.485981	0.0052
	290	0.132809	0.442308						0.606534	0.107434	0.071046	0.121429	0.026984	0.064159				0.675313	0.07045	0.121429		290	0.643305	0.296994							0.43617			0.028986		0.005155				0.550781		0.006928		0.631829	0.01354		0.709213	0.00782
	300	0.137488	0.434615						0.848028	0.158469	0.094653	0.079365	0.022006	0.022222				0.702918	0.003215	0.079365		300	0.624507	0.296994							0.554054			0		0.002372				0.485981		0.009434		0.596241	0.01424		0.559387	0.00349
	310	0.132809	0.425						0.779359	0.160508	0.014286	0.119812	0.045374	0.027893				0.631829	0.0181	0.119812		310	0.578556	0.29433							0.497238			0		0.005336				0.709213		0		0.689873	0.00779		0.378079	0.00453
	320	0.142166	0.425						0.883921	0.220116	0.007782	0.140845	0.036286	0				0.596241	0	0.140845		320	0.611975	0.296994							0.382955			0.031667		0.003425				0.559387		0.004093		0.54375	0.01298		0.586667	0.00845
	330	0.179596	0.425						0.86648	0.180305	0.047059	0.07085	0.027508	0.026641				0.689873	0.036364	0.07085		330	0.570202	0.299658							0.614973			0.020353		0.002123				0.378079		0		0.67437	0.01928		0.4375	0.00344
	340	0.12813	0.423077						0.828667	0.095745	0.016374	0.046448	0.022959	0.022526				0.54375	0.067901	0.046448		340	0.520074	0.29433							0.415709			0.011925		0.010884				0.586667		0.002037		0.575342	0.01158		0.452381	0.00642
	350	0.151524	0.426923						0.741073	0.103713	0.00996	0.164072	0.002134	0.052331				0.67437	0.027273	0.164072		350	0.532606	0.295662							0.75705			0.030963		0.012987				0.4375		0.001364		0.563107	0.01384		0.452381	0.00409
	360	0.16556	0.421154						0.647211	0.148515	0.011429	0.07489	0.05977	0.019886				0.575342	0.075	0.07489		360	0.513808	0.292998							0.333333			0.024631		0.005365				0.452381		0.010256		0.788462	0.01319		0.422222	0.00505
	370	0.160881	0.421154						0.594635		0.011407	0.065975	0.016478	0.023569				0.563107		0.065975		370	0.513808	0.291667							0.6179			0.000977		0.004785				0.452381		0.009371		0.597561	0.01714		0.590604	0.00462
	380	0.123451	0.425						0.763388		0.00979	0.056478	0.039474	0.04232				0.788462		0.056478		380	0.505454	0.292998							0.612069			0.015358		0.008801				0.422222		0.003209		0.663636	0.01266		0.47619	0.00697
	390	0.118773	0.423077						0.614251		0	0.045872	0.039906	0.037448				0.597561		0.045872		390	0.515897	0.296994							0.503828			0.023001		0.006672				0.590604		0.00289		0.862651	0.02334		0.506699	0.00822
	400	0.123451	0.436538						0.793651		0.009009	0.197065	0.069331	0.033694				0.663636		0.197065		400	0.503365	0.295662							0.750859			0.011236		0.012129				0.47619		0.013158		0.67375	0.01225		0.393023	0.00256
	410	0.114094	0.421154						0.859044		0.003322	0.066327	0.051205	0.044248				0.862651		0.066327		410	0.520074	0.295662							0.684411			0		0.016432				0.506699		0.022034		0.580645	0.01373		0.569378	0.0081
	420	0.151524	0.421154						0.718167			0.104016	0.015843	0.024434				0.67375		0.104016		420	0.538872	0.290335							0.663763			0.009298		0.002075				0.393023		0.004739		0.695291	0.01364		0.294964	0.00209
	430	0.132809	0.425						0.891607			0.097064	0.02376	0.045267				0.580645		0.097064		430	0.501276	0.29433							0.723858			0.012195		0.002312				0.569378		0.001976		0.704	0.01471		0.577889	0.00877
	440	0.118773	0.438462						0.666935			0.081439	0	0.031469				0.695291		0.081439		440	0.536783	0.29433							0.726989			0.027188		0.013548				0.294964		0.008208		0.426796	0.01629		0.885714	0.0124
	450	0.151524	0.432692						0.78894			0.059701	0.046512	0.011161				0.704		0.059701		450	0.505454	0.311644							0.417946			0		0.004045				0.577889		0.002558		0.444867	0.0125		0.372694	0.00344
	460	0.118773	0.448077						0.623371			0.060302	0.003517	0.030303				0.426796		0.060302		460	0.49501	0.298326							0.7017			0.014085		0.007267				0.885714		0.002339		0.86618	0.02394		0.624183	0.00707
	470	0.123451	0.423077						0.763416			0.039474	0.026275	0.025641				0.444867		0.039474		470	0.499188	0.296994							0.693487			0.022599		0.008421				0.372694		0		0.545455	0.01286		0.594667	0.00304
	480	0.12813	0.428846						0.82781			0.096063	0.031813	0.013514				0.86618		0.096063		480	0.499188	0.296994							0.673333			0.012658		0.003476				0.624183		0.021277		0.643692	0.0149		0.484848	0.00832
	490	0.118773	0.440385						0.734552			0.024096	0.035419	0.024793				0.545455		0.024096		490	0.497099	0.295662							0.673567					0.003012				0.594667				0.662921	0.01308		0.572881	0.00713
	500	0.12813	0.421154						0.577054			0.10859	0.043584	0.022845				0.643692		0.10859		500	0.501276	0.29433							0.713911					0				0.484848				0.387755	0.01204		0.664122	0.00372
	510	0.123451	0.434615						0.660329			0.036419	0.021596	0				0.662921		0.036419		510	0.501276	0.303653							0.651403					0.010204				0.572881				0.4	0.01601		0.619048	0.00524
	520	0.100058	0.425						0.629623			0.025586	0.023398	0.041558				0.387755		0.025586		520	0.509631	0.29433							0.642935					0.004744				0.664122				0.716216	0.01588		0.603604	0.00531
	530	0.123451	0.425						0.601833			0.026027	0.001406	0.012987				0.4		0.026027		530	0.49501	0.290335							0.603538					0.013514				0.619048				0.810427	0.03897		0.83432	0.01056
	540	0.123451	0.419231						0.811107			0.009585	0.023622	0.008857				0.716216		0.009585		540	0.505454	0.29433							0.685577					0.01763				0.603604				0.645022	0.01194		0.84	0.00923
	550	0.104736	0.425						0.728198			0.037681		0.016807				0.810427		0.037681		550	0.499188	0.29433							0.794231					0				0.83432				0.378571	0.01331
	560	0.109415	0.428846						0.630305					0.033503				0.645022				560	0.499188	0.299658							0.75891					0.007821				0.84				0.931373	0.03055
	570	0.114094	0.419231						0.641084					0.026316				0.378571				570	0.499188	0.291667												0								0.765166	0.01078
	580	0.109415	0.425						0.679748					0.017857				0.9				580	0.51172	0.29433												0.081967								0.7646	0.0269
	590	0.104736	0.423077						0.571139					0.056507				0.931373				590	0.484567	0.29433												0.006993								0.639344	0.01318
	600	0.0907	0.425						0.530685					0.028169				0.765166				600	0.497099	0.287671												0.029508								0.684211	0.01974
									0.651135					0.033708				0.7646																		0								0.673098	0.01515
									0.550203					0.058719				0.639344																		0.024217								0.888337	0.03764
									0.677314					0.030303				0.684211																		0.012487								0.706963	0.01631
									0.566468					0.025316				0.673098																		0.009333								0.625352	0.01582
									0.703722					0.00813				0.888337																										0.677104	0.01453
									0.638327					0.044018				0.706963																										0.836289	0.0282
									0.72737					0.03664				0.625352																										0.635036	0.0134
									0.454656					0.059406				0.677104																										0.449664	0.00939
									0.559682					0.02148				0.836289																										0.907814	0.03866
									0.745221					0.013158				0.635036																										0.493204	0.01368
									0.581905					0				0.449664																										0.655172	0.01268
									0.798336					0.067449				0.907814																										0.482866	0.01541
									0.454514					0.0107				0.493204																										0.496032	0.01441
									0.567568					0.027893				0.655172																										0.618273	0.01488
									0.516895					0.03664				0.482866																										0.615789	0.01441
									0.882242					0.028693				0.496032																										0.860208	0.04415
									0.534861					0.038033				0.618273																										0.511848	0.01394
									0.726182					0.029573				0.615789																										0.863744	0.02157
									0.873997					0.014257				0.860208																										0.412322	0.00585
									0.716914					0.019565				0.511848																										0.81629	0.02427
									0.579989					0.027893				0.863744																										0.761614	0.02794
									0.768295					0				0.412322																										0.449664	0.00725
									0.870959					0.024434				0.81629																										0.75	0.01635
									0.861464					0.03062				0.761614																										0.496612	0.00925
									0.744059					0.027001				0.449664																										0.610879	0.0122
									0.70564					0				0.75																										0.677249	0.01609
									0.6946									0.496612																										0.538012	0.01076
									0.834973									0.610879																										0.479263	0.0078
									0.701351									0.677249																										0.860789	0.0312
									0.79237									0.538012																										0.727517	0.00722
									0.526631									0.479263																										0.567179	0.01151
									0.669017									0.860789																										0.677519	0.01366
									0.65178									0.727517																										0.658333	0.01722
									0.596726									0.567179																										0.801896	0.01503
									0.688094									0.677519																										0.76587	0.03162
									0.777602									0.658333																										0.764151	0.01303
									0.867985									0.801896																										0.734104	0.01433
									0.871012									0.76587																										0.580952	0.02034
									0.879434									0.764151																										0.418283	0.01238
									0.611975									0.734104																										0.746988	0.01509
									0.718686									0.580952																										0.578704	0.00833
									0.516906									0.418283																										0.669935	0.01423
									0.76773									0.746988																										0.529086	0.01317
									0.514793									0.578704																										0.66557	0.01321
									0.845347									0.669935																										0.84031	0.01764
									0.492308									0.529086																										0.707865	0.01211
									0.812245									0.66557																										0.631829	0.01097
									0.637224									0.84031																										0.481982	0.00537
									0.633028									0.707865																										0.711538	0.01568
									0.756592									0.631829																										0.737288	0.01556
									0.698565									0.481982																										0.875	0.03037
									0.675227									0.711538																										0.710059	0.01706
									0.717105									0.737288																										0.798198	0.02428
									0.649215									0.875																										0.780967	0.02145
									0.694981									0.710059																										0.613924	0.01358
									0.712329									0.798198																										0.457364	0.00833
									0.738144									0.780967																										0.547872	0.01499
									0.729499									0.613924																										0.445215	0.00911
									0.569444									0.457364																										0.408994	0.00816
									0.022989									0.547872																										0.159375	0.01488
									0.035907									0.445215																										0.195313	0.00514
									0.086364									0.408994																										0.171429	0.00491
									0.105099									0.159375
									0.04886									0.195313
									0.054795									0.171429
[truncated: 36 more columns]
