# Supplementary material for: ATP and large signaling metabolites flux through caspase-activated Pannexin 1 channels
Source: eLife. 2021 Jan 7;10:e64787. doi: 10.7554/eLife.64787 (PMC7806264; doi:10.7554/eLife.64787)
Supplement: Figure 4—figure supplement 2—source data 1. [file elife-64787-fig4-figsupp2-data1.xlsx]

## Sheet: Sheet1
	Figure 4 Supplement 2 ATP and Spermidine Concurrent Flux in Proteoliposomes (picomoles)
	B) ATP						C) Spermidine
Panx1	-	-	+	+		Panx1	-	-	+	+
Casp3	-	+	-	+		Casp3	-	+	-	+
	75.8399	37.5537	80.2654	705.365			74.0038	58.3501	67.7115	135.305
	241.404	254.168	127.206	357.281			89.7324	89.1324	72.9762	117.007
	67.4752	185.783	94.269	429.993			95.7023	76.5073	75.1676	154.744
	194.891	270.054	381.155	912.849			109.875	105.744	138.415	164.399
	145.491	355.166	234.895	613.167			86.9173	96.0484	97.4311	110.409
