# Supplementary material for: ATP and large signaling metabolites flux through caspase-activated Pannexin 1 channels
Source: eLife. 2021 Jan 7;10:e64787. doi: 10.7554/eLife.64787 (PMC7806264; doi:10.7554/eLife.64787)
Supplement: Figure 4—source data 1. [file elife-64787-fig4-data1.xlsx]

## Sheet: Sheet1
	Figure 4 B,C,D Metabolite Flux in Proteoliposomes (picomoles)
	B) ATP						C) Glutamate						D) Spermidine
Panx1	-	-	+	+		Panx1	-	-	+	+		Panx1	-	-	+	+
Casp3	-	+	-	+		Casp3	-	+	-	+		Casp3	-	+	-	+
	819.128	385.789	426.598	2131.96			213.876	168.255	138.288	357.816			123.404	120.018	138.596	228.64
	358.314	1459.39	446.942	1882.54			51.7303	38.8217	39.6487	129.816			117.125	124.73	149.894	221.389
	350.047	270.558	289.949	637.022			59.0636	36.875	26.7397	93.8886			159.64	93.8207	135.825	303.713
	239.32	384.016	319.264	643.983			49.2164	51.7805	40.2244	233.868			117.938	75.4197	95.5498	280.452
	432.473	490.337	285.557	690.275			88.2631	111.064	144.073	208.044			136.239	96.8432	120.985	273.353
	206.609	209.206	152.635	860.577			158.157	229.747	210.238	368.628
	143.754	531.967	314.565	1237.84
	219.351	341.534	176.105	1381.43
